# Supplementary material for: Pyridine-enabled copper-promoted cross dehydrogenative coupling of C(sp2)–H and unactivated C(sp3)–H bonds
Source: PubMed Central journal article supplement (PMC5950755; doi:10.1039/c5sc02143j), 2015-07-20

# Pyridine-Enabled Copper-Promoted Cross Dehydrogenative Coupling of C(sp<sup>2</sup>)-H and C(sp<sup>3</sup>)-H Bonds

Xuesong Wu, Yan Zhao, and Haibo Ge\*

## Table of Contents

|                                                                                            |     |
|--------------------------------------------------------------------------------------------|-----|
| <b>General Information</b> .....                                                           | S2  |
| <b>Structures of Starting Materials</b> .....                                              | S3  |
| <b>General Procedure for Copper-Promoted Cross Dehydrogenative Coupling of Amides</b> .... | S4  |
| <b>Analytical Data</b> .....                                                               | S4  |
| <b>Deuterium Labeling Experiment</b> .....                                                 | S20 |
| <b>Parallel KIE Experiment</b> .....                                                       | S22 |
| <b>References</b> .....                                                                    | S23 |
| <b><sup>1</sup>H, <sup>13</sup>C and <sup>19</sup>F NMR Spectra</b> .....                  | S24 |

## General Information

$^1\text{H}$ ,  $^{13}\text{C}$  and  $^{19}\text{F}$  NMR spectra were recorded on a Bruker 500 MHz NMR Fourier transform spectrometer (500 MHz and 125 MHz, respectively) using tetramethylsilane as an internal reference, and chemical shifts ( $\delta$ ) and coupling constants ( $J$ ) were expressed in ppm and Hz, respectively. Infrared spectra were obtained using a Thermo Nicolet IR 330 spectrometer. Mass (MS) analysis were obtained using Agilent 1100 series LC/MSD system with Electrospray Ionization (ESI). All the solvents and commercially available reagents were purchased from commercial sources and used directly.

Starting materials **1a-d**, **1f-n**,  $[\text{D}_3]$ -**1b** and **4-7** were prepared according to literature procedures.<sup>1,2</sup> **1e** were prepared from **1b** based on reported reaction protocol.<sup>2</sup>

## Structures of Starting Materials

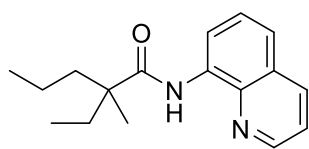

**1a**

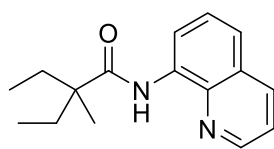

**1b**

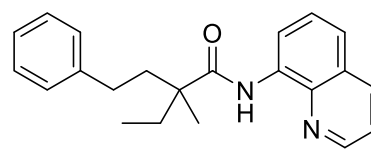

**1c**

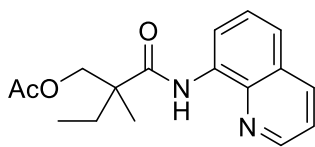

**1d**

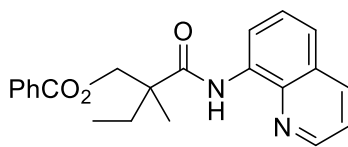

**1e**

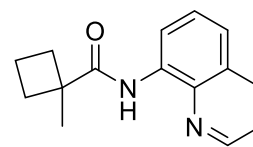

**1f**

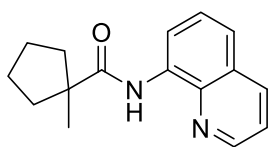

**1g**

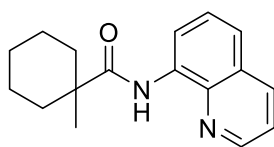

**1h**

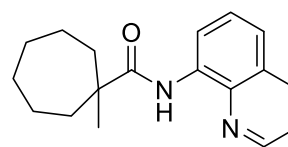

**1i**

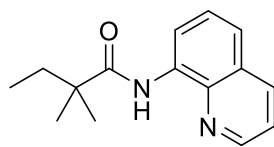

**1j**

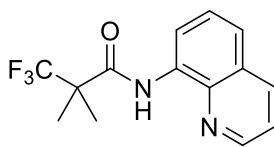

**1k**

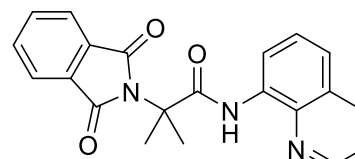

**1l**

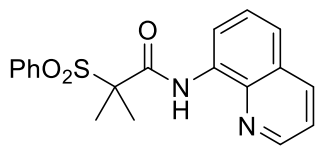

**1m**

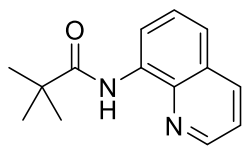

**1n**

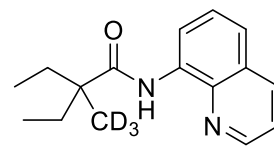

**[D<sub>3</sub>]-1b**

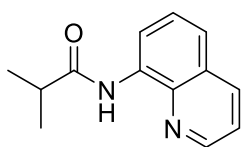

**4**

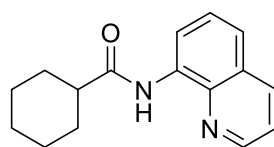

**5**

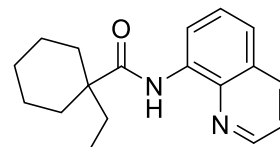

**6**

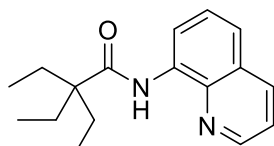

**7**

## General Procedure for Copper-Promoted Cross Dehydrogenative Coupling of Amides

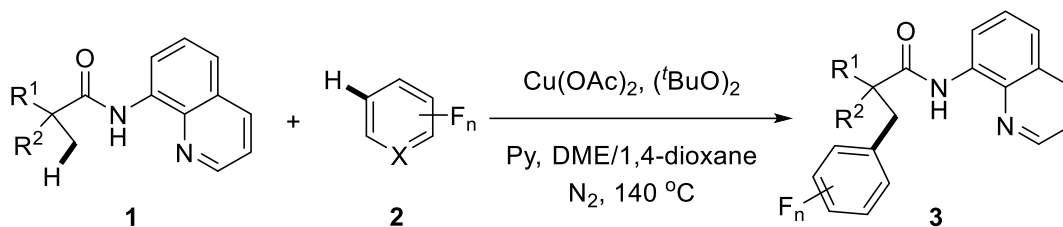

A 50 mL Schlenk tube was charged with amide (**1**, 0.30 mmol),  $\text{Cu}(\text{OAc})_2$  (54.5 mg, 0.30 mmol), DME/1,4-dioxane (7:3, v/v, 1.0 mL), pyridine (72  $\mu\text{L}$ , 71 mg, 0.90 mmol), *tert*-butyl peroxide (138  $\mu\text{L}$ , 110 mg, 0.75 mmol) and fluoroarene (0.60 mmol) in sequence under  $\text{N}_2$  atmosphere. The tube was capped with a Teflon screw cap, and stirred at 140  $^\circ\text{C}$  for 16h. Then the reaction mixture was cooled to room temperature, diluted with EtOAc (30 mL). The organic layer was washed with 5% aqueous NaOH (10 mL), water (20 mL), brine (10 mL), dried over anhydrous sodium sulfate, and concentrated under reduced pressure. The residue was purified by flash column chromatography on silica gel, eluting with  $\text{CH}_2\text{Cl}_2$ /Hexane (1:2 ~ 3:1, v/v), to afford corresponding product **3**.

## Analytical Data

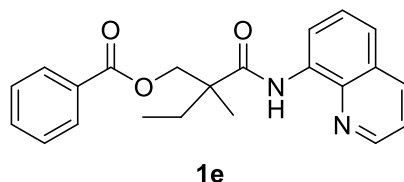

Compound **1e**, colorless oil,  $R_f = 0.33$  (hexane/EtOAc 4:1).  $^1\text{H}$  NMR (500 MHz,  $\text{CDCl}_3$ )  $\delta$  10.50 (brs, 1H), 8.83 (dd,  $J = 7.4, 1.5$  Hz, 1H), 8.57 (dd,  $J = 4.2, 1.7$  Hz, 1H), 8.15 (dd,  $J = 8.3, 1.6$  Hz, 1H), 8.08 (dd,  $J = 8.3, 1.2$  Hz, 2H), 7.56 – 7.49 (m, 3H), 7.41 (dd,  $J = 8.3, 4.2$  Hz, 1H), 7.36 – 7.31 (m, 2H), 4.58 (d,  $J = 11.2$  Hz, 1H), 4.50 (d,  $J = 11.2$  Hz, 1H), 2.10 – 2.01 (m, 1H), 1.88 – 1.78 (m, 1H), 1.53 (s, 3H), 1.04 (t,  $J = 7.5$  Hz, 3H);  $^{13}\text{C}$  NMR (125 MHz,  $\text{CDCl}_3$ )  $\delta$  173.7, 166.5, 148.3, 138.9, 136.4, 134.7, 133.1, 130.1, 130.0, 128.4, 128.1, 127.6, 121.7 (2C), 116.7, 69.9, 47.9, 29.5, 19.7, 8.8; IR (neat)  $\nu$  3359, 2968, 1722, 1682, 1529, 1487, 1424, 1384, 1325, 1270, 1111, 826, 791, 711; Ms (ESI):  $m/z = 363.2$  [ $\text{M}+\text{H}$ ] $^+$ .

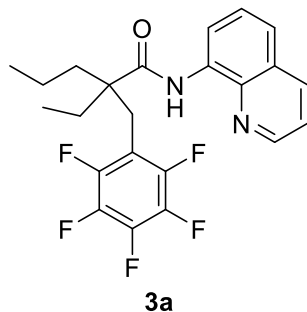

Compound **3a**, colorless oil, yield: 92%,  $R_f = 0.55$  (hexane/EtOAc 5:1).  $^1\text{H}$  NMR (500 MHz,  $\text{CDCl}_3$ )  $\delta$  10.06 (brs, 1H), 8.76 – 8.71 (m, 2H), 8.12 (dd,  $J = 8.3, 1.6$  Hz, 1H), 7.55 – 7.40 (m, 3H), 3.11 – 3.03 (m, 2H), 1.97 – 1.88 (m, 1H), 1.87 – 1.79 (m, 2H), 1.76 – 1.68 (m, 1H), 1.50 – 1.39 (m, 2H), 1.05 (t,  $J = 7.4$  Hz, 3H), 1.00 (t,  $J = 7.3$  Hz, 3H);  $^{13}\text{C}$  NMR (125 MHz,  $\text{CDCl}_3$ )  $\delta$  173.3, 148.2, 145.9 (dm,  $J = 244.9$  Hz), 140.0 (dm,  $J = 250.8$  Hz), 138.8, 137.4 (dm,  $J = 249.0$  Hz), 136.4, 134.3, 128.0, 127.6, 121.6, 121.5, 116.6, 111.7 (m), 51.7, 36.4, 29.6, 27.1, 17.6, 14.7, 8.7;  $^{19}\text{F}$  NMR (471 MHz,  $\text{CDCl}_3$ )  $\delta$  -139.6 (dd,  $J = 22.6, 7.5$  Hz, 2F), -156.7 (t,  $J = 20.9$  Hz, 1F), -163.2 (m, 2F); IR (neat)  $\nu$  3357, 2964, 2875, 1683, 1520, 1424, 1385, 1325, 1263, 1124, 1022, 959, 908, 826, 791, 737; Ms (ESI):  $m/z = 437.2$   $[\text{M}+\text{H}]^+$ .

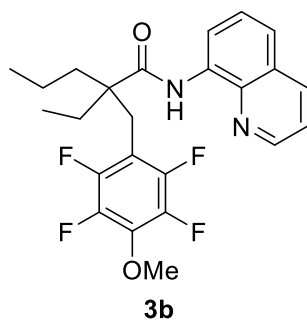

Compound **3b**, white solid, yield: 71%,  $R_f = 0.45$  (hexane/EtOAc 5:1).  $^1\text{H}$  NMR (500 MHz,  $\text{CDCl}_3$ )  $\delta$  10.06 (brs, 1H), 8.76 – 8.72 (m, 2H), 8.14 (dd,  $J = 8.3, 1.6$  Hz, 1H), 7.56 – 7.52 (m, 1H), 7.48 (dd,  $J = 8.3, 1.3$  Hz, 1H), 7.43 (dd,  $J = 8.2, 4.2$  Hz, 1H), 3.95 (t,  $J = 1.1$  Hz, 3H), 3.12 – 3.02 (m, 2H), 1.95 – 1.87 (m, 1H), 1.85 – 1.77 (m, 2H), 1.74 – 1.66 (m, 1H), 1.50 – 1.40 (m, 2H), 1.04 (t,  $J = 7.4$  Hz, 3H), 0.99 (t,  $J = 7.3$  Hz, 3H);  $^{13}\text{C}$  NMR (125 MHz,  $\text{CDCl}_3$ )  $\delta$  173.7, 148.2, 146.2 (dm,  $J = 243.0$  Hz), 140.8 (dm,  $J = 244.9$  Hz), 138.8, 137.0 (m), 136.4, 134.5, 128.0, 127.7, 121.6, 121.4, 116.6, 109.9 (m), 62.1, 51.7, 36.7, 29.5, 27.2, 17.7, 14.8, 8.8;  $^{19}\text{F}$  NMR (471 MHz,  $\text{CDCl}_3$ )  $\delta$  -141.3 (dd,  $J = 21.7, 8.3$  Hz, 2F), -159.0 (dd,  $J = 21.7, 8.3$  Hz, 2F); IR (neat)  $\nu$  3357, 2963, 2874, 1682, 1529, 1489, 1385, 1325, 1131, 1015, 960, 826, 792, 733; Ms (ESI):  $m/z = 449.2$   $[\text{M}+\text{H}]^+$ .

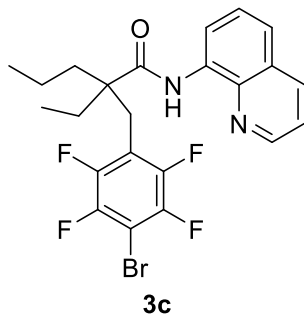

Compound **3c**, colorless oil, yield: 80%,  $R_f = 0.55$  (hexane/EtOAc 5:1).  $^1\text{H}$  NMR (500 MHz,  $\text{CDCl}_3$ )  $\delta$  10.03 (brs, 1H), 8.73 – 8.70 (m, 2H), 8.15 (dd,  $J = 8.3, 1.6$  Hz, 1H), 7.56 – 7.48 (m, 2H), 7.43 (dd,  $J = 8.2, 4.2$  Hz, 1H), 3.14 – 3.06 (m, 2H), 1.97 – 1.89 (m, 1H), 1.87 – 1.79 (m, 2H), 1.77 – 1.69 (m, 1H), 1.50 – 1.39 (m, 2H), 1.05 (t,  $J = 7.4$  Hz, 3H), 1.00 (t,  $J = 7.3$  Hz, 3H);  $^{13}\text{C}$  NMR (125 MHz,  $\text{CDCl}_3$ )  $\delta$  173.3, 148.3, 146.0 (dm,  $J = 246.8$  Hz), 144.8 (dm,  $J = 245.0$  Hz), 138.8, 136.7 (m), 136.4, 134.3, 128.0, 127.6, 121.7, 121.5, 166.6, 98.1 (m), 51.8, 36.5, 30.2, 27.2, 17.7, 14.8, 8.7;  $^{19}\text{F}$  NMR (471 MHz,  $\text{CDCl}_3$ )  $\delta$  -134.6 (m, 2F), -138.2 (dd,  $J = 21.5, 8.6$  Hz, 2F); IR (neat)  $\nu$  3356, 2964, 2874, 1678, 1529, 1485, 1385, 1325, 1261, 1142, 948, 909, 826, 791, 733; Ms (ESI):  $m/z = 497.1$   $[\text{M}+\text{H}]^+$ .

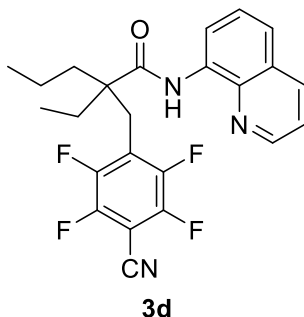

Compound **3d**, colorless oil, yield: 85%,  $R_f = 0.36$  (hexane/EtOAc 5:1).  $^1\text{H}$  NMR (500 MHz,  $\text{CDCl}_3$ )  $\delta$  10.06 (brs, 1H), 8.75 (dd,  $J = 4.2, 1.7$  Hz, 1H), 8.68 (dd,  $J = 7.0, 1.9$  Hz, 1H), 8.18 (dd,  $J = 8.3, 1.6$  Hz, 1H), 7.57 – 7.51 (m, 2H), 7.48 (dd,  $J = 8.3, 4.2$  Hz, 1H), 3.18 – 3.10 (m, 2H), 2.00 – 1.91 (m, 1H), 1.90 – 1.81 (m, 2H), 1.78 – 1.71 (m, 1H), 1.52 – 1.36 (m, 2H), 1.06 (t,  $J = 7.4$  Hz, 3H), 1.02 (t,  $J = 7.3$  Hz, 3H);  $^{13}\text{C}$  NMR (125 MHz,  $\text{CDCl}_3$ )  $\delta$  172.7, 147.3, 146.9 (dm,  $J = 259.8$  Hz), 145.7 (dm,  $J = 247.0$  Hz), 138.8, 136.6, 134.1, 128.0, 127.7, 124.9 (m), 121.8 (2C), 116.7, 107.7, 92.7 (m), 52.2, 36.4, 31.0, 27.1, 17.7, 14.8, 8.7;  $^{19}\text{F}$  NMR (471 MHz,  $\text{CDCl}_3$ )  $\delta$  -133.7 (m, 2F), -136.4 (m, 2F); IR (neat)  $\nu$  3361, 2965, 2875, 2246, 1675, 1530, 1491, 1385, 1325, 1298, 956, 826, 792, 738; Ms (ESI):  $m/z = 444.2$   $[\text{M}+\text{H}]^+$ .

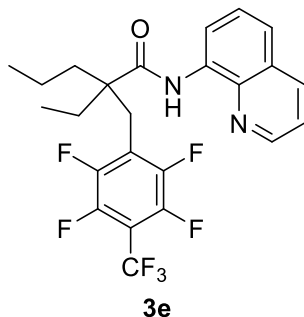

Compound **3e**, colorless oil, yield: 94%,  $R_f = 0.54$  (hexane/EtOAc 5:1).  $^1\text{H}$  NMR (500 MHz,  $\text{CDCl}_3$ )  $\delta$  10.06 (brs, 1H), 8.73 – 8.70 (m, 2H), 8.16 (dd,  $J = 8.3, 1.6$  Hz, 1H), 7.56 – 7.49 (m, 2H), 7.44 (dd,  $J = 8.3, 4.2$  Hz, 1H), 3.18 – 3.10 (m, 2H), 1.99 – 1.90 (m, 1H), 1.89 – 1.81 (m, 2H), 1.78 – 1.71 (m, 1H), 1.52 – 1.39 (m, 2H), 1.06 (t,  $J = 7.4$  Hz, 3H), 1.01 (t,  $J = 7.3$  Hz, 3H);  $^{13}\text{C}$  NMR (125 MHz,  $\text{CDCl}_3$ )  $\delta$  173.0, 148.3, 146.1 (dm,  $J = 246.1$  Hz), 143.9 (dm,  $J = 257.4$  Hz), 138.8, 136.5, 134.2, 128.0, 127.6, 122.0 (m), 121.7, 121.6, 120.9 (q,  $J = 269.6$  Hz), 116.6, 108.6 (m), 52.0, 36.5, 30.4, 27.2, 17.7, 14.8, 8.7;  $^{19}\text{F}$  NMR (471 MHz,  $\text{CDCl}_3$ )  $\delta$  -56.3 (t,  $J = 21.4$  Hz, 3F), -137.77 (m, 2F), -141.9 (m, 2F); IR (neat)  $\nu$  3357, 2965, 2876, 1683, 1530, 1492, 1331, 1147, 960, 826, 792, 715; Ms (ESI):  $m/z = 487.1$   $[\text{M}+\text{H}]^+$ .

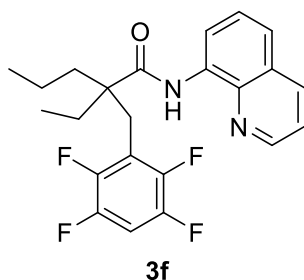

Compound **3f**, colorless oil, yield: 88%,  $R_f = 0.52$  (hexane/EtOAc 5:1).  $^1\text{H}$  NMR (500 MHz,  $\text{CDCl}_3$ )  $\delta$  10.08 (brs, 1H), 8.76 – 8.72 (m, 2H), 8.14 (dd,  $J = 8.3, 1.6$  Hz, 1H), 7.56 – 7.41 (m, 3H), 6.90 – 6.82 (m, 1H), 3.18 – 3.10 (m, 2H), 1.96 – 1.88 (m, 1H), 1.87 – 1.78 (m, 2H), 1.76 – 1.68 (m, 1H), 1.50 – 1.41 (m, 2H), 1.05 (t,  $J = 7.4$  Hz, 3H), 0.99 (t,  $J = 7.3$  Hz, 3H);  $^{13}\text{C}$  NMR (125 MHz,  $\text{CDCl}_3$ )  $\delta$  173.6, 148.2, 145.7 (dm,  $J = 246.6$  Hz), 138.9, 136.4, 134.5, 128.0, 127.7, 121.6, 121.4, 117.7 (m), 116.6, 104.5 (m), 51.8, 36.8, 29.9, 27.3, 17.7, 14.8, 8.8;  $^{19}\text{F}$  NMR (471 MHz,  $\text{CDCl}_3$ )  $\delta$  -140.1 (m, 4F); IR (neat)  $\nu$  3357, 3054, 2964, 2875, 1683, 1505, 1386, 1325, 1253, 1171, 938, 826, 792, 738; Ms (ESI):  $m/z = 419.2$   $[\text{M}+\text{H}]^+$ .

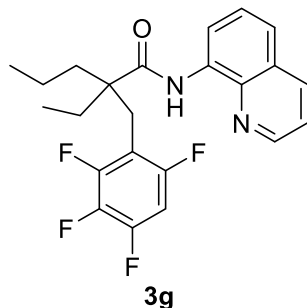

Compound **3g**, colorless oil, yield: 84%,  $R_f = 0.52$  (hexane/EtOAc 5:1).  $^1\text{H}$  NMR (500 MHz,  $\text{CDCl}_3$ )  $\delta$  10.04 (brs, 1H), 8.75 – 8.71 (m, 2H), 8.15 (dd,  $J = 8.3, 1.6$  Hz, 1H), 7.56 – 7.47 (m, 2H), 7.43 (dd,  $J = 8.2, 4.2$  Hz, 1H), 6.62 – 6.55 (m, 1H), 3.09 – 3.00 (m, 2H), 1.95 – 1.87 (m, 1H), 1.85 – 1.77 (m, 2H), 1.74 – 1.67 (m, 1H), 1.48 – 1.39 (m, 2H), 1.04 (t,  $J = 7.4$  Hz, 3H), 0.99 (t,  $J = 7.3$  Hz, 3H);  $^{13}\text{C}$  NMR (125 MHz,  $\text{CDCl}_3$ )  $\delta$  173.7, 156.3 (dm,  $J = 244.0$  Hz), 150.8 (dm,  $J = 247.6$  Hz), 149.4 (dm,  $J = 248.0$  Hz), 148.2, 138.8, 137.2 (dm,  $J = 246.3$  Hz), 136.4, 134.5, 128.0, 127.6, 121.6, 121.4, 116.5, 111.6 (m), 100.3 (m), 51.6, 36.5, 29.5, 27.1, 17.6, 14.8, 8.7;  $^{19}\text{F}$  NMR (471 MHz,  $\text{CDCl}_3$ )  $\delta$  -114.6 (t,  $J = 10.0$  Hz, 1F), -132.2 (d,  $J = 18.9$  Hz, 1F), -134.8 (m, 1F), -165.7 (m, 1F); IR (neat)  $\nu$  3357, 3052, 2964, 2874, 1678, 1528, 1385, 1325, 1254, 1114, 1052, 909, 826, 791, 734; Ms (ESI):  $m/z = 419.2$   $[\text{M}+\text{H}]^+$ .

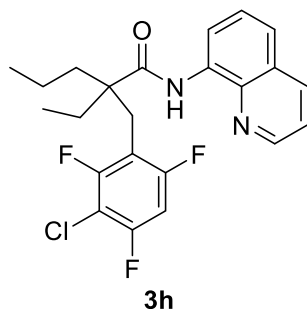

Compound **3h**, colorless oil, yield: 73%,  $R_f = 0.50$  (hexane/EtOAc 5:1).  $^1\text{H}$  NMR (500 MHz,  $\text{CDCl}_3$ )  $\delta$  9.99 (brs, 1H), 8.74 (dd,  $J = 7.6, 1.3$  Hz, 1H), 8.69 (dd,  $J = 4.2, 1.7$  Hz, 1H), 8.14 (dd,  $J = 8.3, 1.6$  Hz, 1H), 7.56 – 7.40 (m, 3H), 6.63 – 6.57 (m, 1H), 3.08 – 2.98 (m, 2H), 1.96 – 1.86 (m, 1H), 1.85 – 1.77 (m, 2H), 1.75 – 1.67 (m, 1H), 1.49 – 1.39 (m, 2H), 1.04 (t,  $J = 7.4$  Hz, 3H), 1.00 (t,  $J = 7.2$  Hz, 3H).  $^{13}\text{C}$  NMR (125 MHz,  $\text{CDCl}_3$ )  $\delta$  173.7, 159.9 (dm,  $J = 247.1$  Hz), 158.2 (dm,  $J = 248.1$  Hz), 157.3 (dm,  $J = 248.1$  Hz), 148.2, 138.8, 136.4, 134.5, 128.0, 127.6, 121.6, 121.4, 116.5, 111.4 (m), 105.9 (m), 100.4 (m), 51.7, 36.4, 29.8, 27.0, 17.6, 14.9, 8.8;  $^{19}\text{F}$  NMR (471 MHz,  $\text{CDCl}_3$ )  $\delta$  -110.0 (m, 2F), -113.1 (m, 1F); IR (neat)  $\nu$  3357, 3053, 2963,



2874, 1682, 1527, 1486, 1436, 1385, 1149, 1047, 909, 826, 791, 736; Ms (ESI):  $m/z$  = 435.1  $[M+H]^+$ .

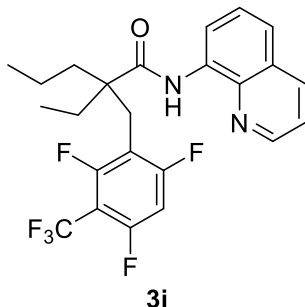

Compound **3i**, colorless oil, yield: 92%,  $R_f$  = 0.51 (hexane/EtOAc 3:1).  $^1\text{H}$  NMR (500 MHz,  $\text{CDCl}_3$ )  $\delta$  10.01 (brs, 1H), 8.73 – 8.68 (m, 2H), 8.14 (dd,  $J$  = 8.3, 1.6 Hz, 1H), 7.55 – 7.47 (m, 2H), 7.42 (dd,  $J$  = 8.2, 4.2 Hz, 1H), 6.63 – 6.57 (m, 1H), 3.06 – 2.98 (m, 2H), 1.97 – 1.88 (m, 1H), 1.87 – 1.78 (m, 2H), 1.75 – 1.68 (m, 1H), 1.50 – 1.38 (m, 2H), 1.04 (t,  $J$  = 7.4 Hz, 3H), 1.00 (t,  $J$  = 7.3 Hz, 3H);  $^{13}\text{C}$  NMR (125 MHz,  $\text{CDCl}_3$ )  $\delta$  173.4, 164.0 (dm,  $J$  = 253.1 Hz), 159.8 (dm,  $J$  = 257.0 Hz), 159.0 (dm,  $J$  = 257.8 Hz), 148.2, 138.8, 136.4, 134.4, 128.0, 127.6, 121.6, 121.5 (q,  $J$  = 272.1 Hz), 121.5, 116.5, 112.0 (m), 104.4 (m), 101.0 (m), 51.7, 36.2, 29.6, 26.9, 17.6, 14.8, 8.7;  $^{19}\text{F}$  NMR (471 MHz,  $\text{CDCl}_3$ )  $\delta$  -56.5 (t,  $J$  = 22.8 Hz, 3F), -101.3 (q,  $J$  = 9.1 Hz, 1F), -107.95 (m, 1F), -110.7 (m, 1F); IR (neat)  $\nu$  3357, 2964, 2875, 1676, 1634, 1530, 1487, 1450, 1307, 1139, 1054, 910, 826, 792, 735; Ms (ESI):  $m/z$  = 469.2  $[M+H]^+$ .

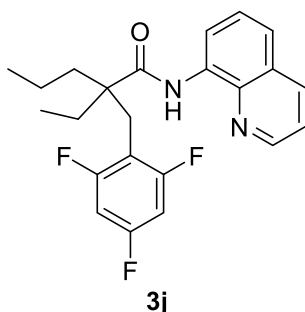

Compound **3j**, colorless oil, yield: 81%,  $R_f$  = 0.48 (hexane/EtOAc 5:1).  $^1\text{H}$  NMR (500 MHz,  $\text{CDCl}_3$ )  $\delta$  10.04 (brs, 1H), 8.76 (dd,  $J$  = 7.6, 1.1 Hz, 1H), 8.71 (dd,  $J$  = 4.2, 1.6 Hz, 1H), 8.13 (dd,  $J$  = 8.3, 1.6 Hz, 1H), 7.55 – 7.46 (m, 2H), 7.41 (dd,  $J$  = 8.2, 4.2 Hz, 1H), 6.52 – 6.46 (m, 2H), 3.07 – 2.98 (m, 2H), 1.95 – 1.86 (m, 1H), 1.85 – 1.77 (m, 2H), 1.73 – 1.66 (m, 1H), 1.48 – 1.39 (m, 2H), 1.03 (t,  $J$  = 7.4 Hz, 3H),

0.99 (t,  $J = 7.3$  Hz, 3H);  $^{13}\text{C}$  NMR (125 MHz,  $\text{CDCl}_3$ )  $\delta$  174.0, 162.3 (ddd,  $J = 248.4$ , 14.8, 11.6 Hz), 161.5 (dt,  $J = 247.8$ , 15.9 Hz), 148.2, 138.8, 136.3, 134.7, 128.0, 127.6, 121.6, 121.2, 116.4, 110.1 (m), 99.9 (m), 51.6, 36.5, 29.1, 27.1, 17.6, 14.8, 8.8;  $^{19}\text{F}$  NMR (471 MHz,  $\text{CDCl}_3$ )  $\delta$  -108.2 (t,  $J = 6.8$  Hz, 2F), -110.6 (m, 1F); IR (neat)  $\nu$  3359, 3053, 2963, 2874, 1683, 1624, 1538, 1488, 1385, 1325, 1117, 1042, 1000, 840, 791, 736; Ms (ESI):  $m/z = 401.2$   $[\text{M}+\text{H}]^+$ .

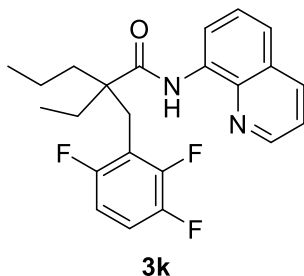

Compound **3k**, colorless oil, yield: 80%,  $R_f = 0.47$  (hexane/EtOAc 5:1).  $^1\text{H}$  NMR (500 MHz,  $\text{CDCl}_3$ )  $\delta$  10.07 (brs, 1H), 8.76 (dd,  $J = 7.6$ , 1.3 Hz, 1H), 8.72 (dd,  $J = 4.2$ , 1.7 Hz, 1H), 8.13 (dd,  $J = 8.3$ , 1.6 Hz, 1H), 7.55 – 7.51 (m, 1H), 7.48 (dd,  $J = 8.3$ , 1.3 Hz, 1H), 7.41 (dd,  $J = 8.2$ , 4.2 Hz, 1H), 6.94 – 6.87 (m, 1H), 6.67 – 6.62 (m, 1H), 3.15 – 3.07 (m, 2H), 1.96 – 1.87 (m, 1H), 1.86 – 1.77 (m, 2H), 1.75 – 1.66 (m, 1H), 1.50 – 1.41 (m, 2H), 1.05 (t,  $J = 7.4$  Hz, 3H), 0.99 (t,  $J = 7.3$  Hz, 3H);  $^{13}\text{C}$  NMR (125 MHz,  $\text{CDCl}_3$ )  $\delta$  173.9, 157.5 (dm,  $J = 242.5$  Hz), 149.9 (dm,  $J = 247.4$  Hz), 148.2, 147.2 (dm,  $J = 242.4$  Hz), 138.9, 136.3, 134.6, 128.0, 127.6, 121.6, 121.3, 116.5, 116.2 (dd,  $J = 22.5$ , 16.9 Hz), 115.1 (dd,  $J = 18.9$ , 9.7 Hz), 110.18 (m), 51.8, 36.8, 29.6, 27.4, 17.7, 14.8, 8.8;  $^{19}\text{F}$  NMR (471 MHz,  $\text{CDCl}_3$ )  $\delta$  -116.2 (m, 1F), -134.3 (dd,  $J = 21.1$ , 8.5 Hz, 1F), -142.9 (m, 1F); IR (neat)  $\nu$  3359, 2963, 2874, 1679, 1529, 1493, 1385, 1325, 1243, 1145, 1029, 942, 825, 791, 737; Ms (ESI):  $m/z = 401.2$   $[\text{M}+\text{H}]^+$ .

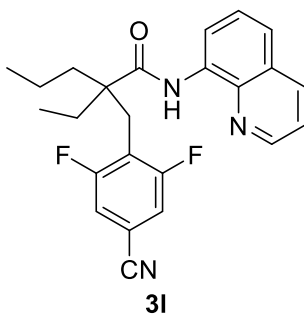

Compound **3l**, colorless oil, yield: 77%,  $R_f = 0.45$  (hexane/EtOAc 3:1).  $^1\text{H}$  NMR (500 MHz,  $\text{CDCl}_3$ )  $\delta$  10.02 (brs, 1H), 8.72 (dd,  $J = 9.0, 2.7$  Hz, 2H), 8.15 (dd,  $J = 8.2, 1.5$  Hz, 1H), 7.56 – 7.48 (m, 2H), 7.44 (dd,  $J = 8.2, 4.2$  Hz, 1H), 7.05 – 7.00 (m, 2H), 3.13 – 3.05 (m, 2H), 1.96 – 1.89 (m, 1H), 1.88 – 1.79 (m, 2H), 1.76 – 1.68 (m, 1H), 1.50 – 1.36 (m, 2H), 1.04 (t,  $J = 7.4$  Hz, 3H), 1.00 (t,  $J = 7.2$  Hz, 3H);  $^{13}\text{C}$  NMR (125 MHz,  $\text{CDCl}_3$ )  $\delta$  173.3, 162.1 (d,  $J = 249.9$  Hz), 162.0 (d,  $J = 249.9$  Hz), 148.2, 138.8, 136.4, 134.4, 128.0, 127.6, 121.7, 121.5, 121.0 (t,  $J = 20.1$  Hz), 116.8 (t,  $J = 3.4$  Hz), 116.5, 115.2 (d,  $J = 22.8$  Hz), 115.1 (d,  $J = 22.6$  Hz), 111.8 (t,  $J = 12.3$  Hz), 51.9, 36.4, 30.0, 27.1, 17.6, 14.8, 8.7;  $^{19}\text{F}$  NMR (471 MHz,  $\text{CDCl}_3$ )  $\delta$  -107.0 (d,  $J = 6.0$  Hz, 2F); IR (neat)  $\nu$  3358, 3065, 2963, 2874, 2232, 1675, 1526, 1487, 1423, 1385, 1325, 1138, 1043, 972, 861, 826, 792, 736; Ms (ESI):  $m/z = 408.2$   $[\text{M}+\text{H}]^+$ .

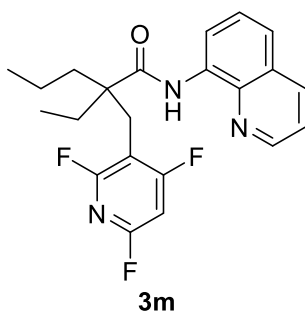

Compound **3m**, pale yellow oil, yield: 79%,  $R_f = 0.38$  (hexane/EtOAc 2:1).  $^1\text{H}$  NMR (500 MHz,  $\text{CDCl}_3$ )  $\delta$  10.08 (brs, 1H), 8.75 – 8.71 (m, 2H), 8.15 (dd,  $J = 8.3, 1.6$  Hz, 1H), 7.56 – 7.48 (m, 2H), 7.44 (dd,  $J = 8.2, 4.2$  Hz, 1H), 6.40 (dd,  $J = 8.0, 2.1$  Hz, 1H), 3.04 – 2.96 (m, 2H), 1.95 – 1.87 (m, 1H), 1.85 – 1.77 (m, 2H), 1.74 – 1.66 (m, 1H), 1.49 – 1.39 (m, 2H), 1.04 (t,  $J = 7.4$  Hz, 3H), 1.00 (t,  $J = 7.3$  Hz, 3H);  $^{13}\text{C}$  NMR (125 MHz,  $\text{CDCl}_3$ )  $\delta$  173.5, 172.0 (dm,  $J = 261.3$  Hz), 161.4 (dm,  $J = 242.1$  Hz), 160.7 (dm,  $J = 241.9$  Hz), 148.3, 138.9, 136.5, 134.4, 128.0, 127.7, 121.7, 121.5, 116.6, 105.9 (m), 95.0 (m), 51.7, 36.5, 29.0, 27.1, 17.6, 14.8, 8.7;  $^{19}\text{F}$  NMR (471 MHz,  $\text{CDCl}_3$ )  $\delta$  -66.3 (m, 1F), -67.7 (dd,  $J = 19.7, 13.4$  Hz, 1F), -92.56 (m, 1F); IR (neat)  $\nu$  3357, 2963, 2874, 1675, 1616, 1528, 1472, 1414, 1385, 1142, 1018, 826, 792, 733; Ms (ESI):  $m/z = 402.2$   $[\text{M}+\text{H}]^+$ .

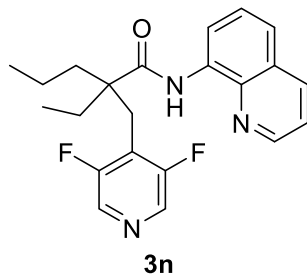

Compound **3n**, pale yellow oil, yield: 83%,  $R_f = 0.33$  (hexane/EtOAc 2:1).  $^1\text{H}$  NMR (500 MHz,  $\text{CDCl}_3$ )  $\delta$  10.07 (brs, 1H), 8.75 – 8.70 (m, 2H), 8.17 (s, 2H), 8.14 (dd,  $J = 8.3, 1.6$  Hz, 1H), 7.56 – 7.47 (m, 2H), 7.42 (dd,  $J = 8.2, 4.2$  Hz, 1H), 3.17 – 3.09 (m, 2H), 1.94 – 1.86 (m, 1H), 1.85 – 1.76 (m, 2H), 1.75 – 1.67 (m, 1H), 1.50 – 1.40 (m, 2H), 1.05 (t,  $J = 7.4$  Hz, 3H), 0.98 (t,  $J = 7.3$  Hz, 3H);  $^{13}\text{C}$  NMR (125 MHz,  $\text{CDCl}_3$ )  $\delta$  173.4, 158.8 (d,  $J = 257.9$  Hz), 158.7 (d,  $J = 258.0$  Hz), 148.3, 138.8, 136.4, 134.4, 134.0 (d,  $J = 24.6$  Hz), 133.9 (d,  $J = 24.8$  Hz), 128.0, 127.6, 122.8 (t,  $J = 17.3$  Hz), 121.7, 121.5, 116.5, 51.8, 36.9, 28.9, 27.5, 17.6, 14.8, 8.7;  $^{19}\text{F}$  NMR (471 MHz,  $\text{CDCl}_3$ )  $\delta$  -126.3 (2F); IR (neat)  $\nu$  3357, 3049, 2963, 2874, 1682, 1527, 1486, 1421, 1385, 1325, 1140, 1040, 909, 826, 791, 733; Ms (ESI):  $m/z = 384.2$   $[\text{M}+\text{H}]^+$ .

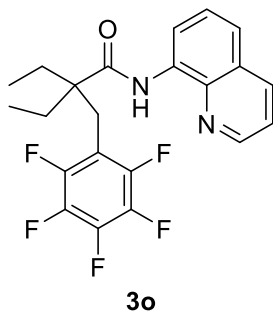

Compound **3o**, colorless oil, yield: 93%,  $R_f = 0.53$  (hexane/EtOAc 5:1).  $^1\text{H}$  NMR (500 MHz,  $\text{CDCl}_3$ )  $\delta$  10.05 (brs, 1H), 8.75 – 8.71 (m, 2H), 8.14 (dd,  $J = 8.3, 1.6$  Hz, 1H), 7.55 – 7.41 (m, 3H), 3.07 (s, 2H), 1.98 – 1.89 (m, 2H), 1.86 – 1.77 (m, 2H), 1.04 (t,  $J = 7.4$  Hz, 6H);  $^{13}\text{C}$  NMR (125 MHz,  $\text{CDCl}_3$ )  $\delta$  173.2, 148.2, 146.0 (dm,  $J = 244.8$  Hz), 140.0 (dm,  $J = 250.8$  Hz), 138.8, 138.4 (dm,  $J = 245.5$  Hz), 136.4, 134.3, 128.0, 127.6, 121.6, 121.5, 116.6, 111.7 (m), 51.9, 29.4, 26.6, 8.6;  $^{19}\text{F}$  NMR (471 MHz,  $\text{CDCl}_3$ )  $\delta$  -139.3 (dd,  $J = 22.6, 7.7$  Hz, 2F), -156.7 (t,  $J = 20.9$  Hz, 1F), -163.2 (m, 2F); IR (neat)  $\nu$  3358, 3051, 2927, 2883, 1683, 1505, 1385, 1325, 1003, 949, 826, 792, 736; Ms (ESI):  $m/z = 423.1$   $[\text{M}+\text{H}]^+$ .

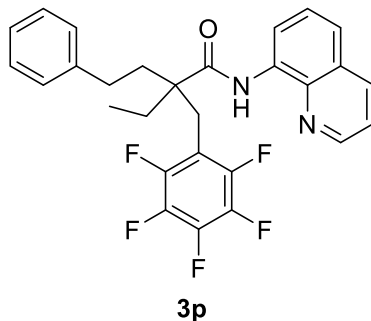

Compound **3p**, pale yellow oil, yield: 84%,  $R_f = 0.51$  (hexane/EtOAc 5:1).  $^1\text{H}$  NMR (500 MHz,  $\text{CDCl}_3$ )  $\delta$  10.14 (brs, 1H), 8.76 – 8.73 (m, 2H), 8.17 (dd,  $J = 8.3, 1.6$  Hz, 1H), 7.58 – 7.44 (m, 3H), 7.31 – 7.24 (m, 4H), 7.21 – 7.17 (m, 1H), 3.15 (dd,  $J = 32.0, 14.1$  Hz, 2H), 2.79 – 2.66 (m, 2H), 2.19 – 2.12 (m, 1H), 2.08 – 1.97 (m, 2H), 1.95 – 1.87 (m, 1H), 1.14 (t,  $J = 7.4$  Hz, 3H);  $^{13}\text{C}$  NMR (125 MHz,  $\text{CDCl}_3$ )  $\delta$  172.9, 148.3, 146.0 (dm,  $J = 245.4$  Hz), 141.9, 140.1 (dm,  $J = 251.4$  Hz), 138.8, 137.5 (dm,  $J = 246.0$  Hz), 136.5, 134.3, 128.6, 128.5, 128.1, 127.7, 126.2, 121.8, 121.7, 116.8, 111.4 (m), 51.7, 36.8, 30.9, 29.5, 27.1, 8.7;  $^{19}\text{F}$  NMR (471 MHz,  $\text{CDCl}_3$ )  $\delta$  -139.2 (dd,  $J = 22.6, 7.6$  Hz, 2F), -156.2 (t,  $J = 20.9$  Hz, 1F), -162.8 (m, 2F); IR (neat)  $\nu$  3357, 2942, 1682, 1521, 1503, 1424, 1385, 1325, 1124, 987, 826, 792, 757, 738, 699; Ms (ESI):  $m/z = 499.2$   $[\text{M}+\text{H}]^+$ .

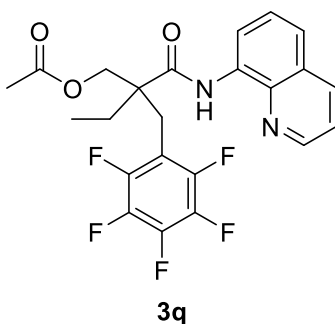

Compound **3q**, white solid, yield: 71%,  $R_f = 0.44$  (hexane/EtOAc 3:1).  $^1\text{H}$  NMR (500 MHz,  $\text{CDCl}_3$ )  $\delta$  10.41 (brs, 1H), 8.76 – 8.73 (m, 2H), 8.18 (dd,  $J = 8.3, 1.6$  Hz, 1H), 7.58 – 7.52 (m, 2H), 7.47 (dd,  $J = 8.3, 4.2$  Hz, 1H), 4.43 (d,  $J = 11.9$  Hz, 1H), 4.33 (d,  $J = 11.9$  Hz, 1H), 3.29 (d,  $J = 14.2$  Hz, 1H), 3.17 (d,  $J = 14.2$  Hz, 1H), 2.23 (s, 3H), 2.05 – 1.96 (m, 1H), 1.80 – 1.72 (m, 1H), 1.02 (t,  $J = 7.4$  Hz, 3H);  $^{13}\text{C}$  NMR (125 MHz,  $\text{CDCl}_3$ )  $\delta$  171.0, 170.7, 148.3, 146.0 (dm,  $J = 248.1$  Hz), 140.3 (dm,  $J = 255.9$  Hz), 138.9, 137.6 (dm,  $J = 245.9$  Hz), 136.6, 134.4, 128.1, 127.7, 122.0, 121.8, 117.1, 110.7 (m), 65.8, 51.3, 28.1, 26.9, 21.0, 8.9;  $^{19}\text{F}$  NMR (471 MHz,  $\text{CDCl}_3$ )  $\delta$  -139.5 (dd,  $J = 22.4, 7.6$  Hz, 2F), -155.6 (t,  $J = 20.9$  Hz, 1F), -162.4 (m, 2F); IR (neat)

$\nu$  3327, 2924, 2361, 1750, 1683, 1522, 1503, 1382, 1227, 1123, 998, 969, 826, 792, 748; Ms (ESI):  $m/z = 467.1$  [M+H]<sup>+</sup>.

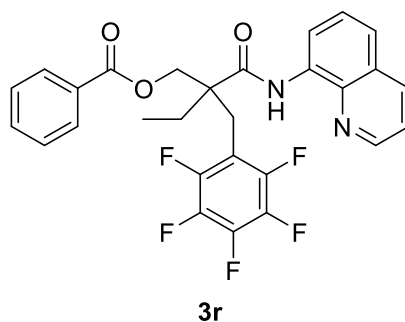

Compound **3r**, white solid, yield: 55%,  $R_f = 0.47$  (hexane/EtOAc 3:1). <sup>1</sup>H NMR (500 MHz, CDCl<sub>3</sub>)  $\delta$  10.47 (brs, 1H), 8.76 (dd,  $J = 7.3, 1.6$  Hz, 1H), 8.36 (dd,  $J = 4.2, 1.7$  Hz, 1H), 8.15 – 8.09 (m, 3H), 7.60 – 7.51 (m, 3H), 7.45 – 7.41 (m, 2H), 7.37 (dd,  $J = 8.3, 4.2$  Hz, 1H), 4.71 (d,  $J = 12.0$  Hz, 1H), 4.64 (d,  $J = 12.0$  Hz, 1H), 3.38 (d,  $J = 14.2$  Hz, 1H), 3.29 (d,  $J = 14.2$  Hz, 1H), 2.15 – 2.07 (m, 1H), 1.94 – 1.85 (m, 1H), 1.08 (t,  $J = 7.4$  Hz, 3H); <sup>13</sup>C NMR (125 MHz, CDCl<sub>3</sub>)  $\delta$  171.0, 166.3, 148.2, 146.0 (dm,  $J = 244.6$  Hz), 140.5 (dm,  $J = 252.8$  Hz), 138.8, 137.6 (dm,  $J = 244.4$  Hz), 136.4, 134.3, 133.4, 130.0, 129.8, 128.6, 128.0, 127.6, 122.0, 121.7, 117.0, 110.7 (m), 66.2, 51.7, 28.5, 27.2, 9.0; <sup>19</sup>F NMR (471 MHz, CDCl<sub>3</sub>)  $\delta$  -139.4 (dd,  $J = 22.5, 7.7$  Hz, 2F), -155.6 (t,  $J = 20.9$  Hz, 1F), -162.3 (m, 2F); IR (neat)  $\nu$  3342, 2925, 2361, 1723, 1683, 1522, 1504, 1266, 1122, 984, 913, 826, 792, 743, 711; Ms (ESI):  $m/z = 529.2$  [M+H]<sup>+</sup>.

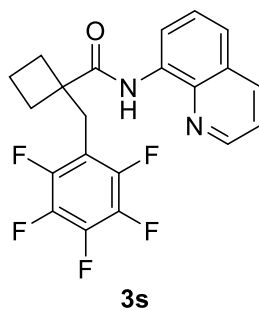

Compound **3s**, colorless oil, yield: 80%,  $R_f = 0.48$  (hexane/EtOAc 5:1). <sup>1</sup>H NMR (500 MHz, CDCl<sub>3</sub>)  $\delta$  9.75 (brs, 1H), 8.72 – 8.69 (m, 2H), 8.16 (dd,  $J = 8.3, 1.6$  Hz,

1H), 7.57 – 7.49 (m, 2H), 7.44 (dd,  $J = 8.3, 4.2$  Hz, 1H), 3.31 (s, 2H), 2.67 – 2.60 (m, 2H), 2.29 – 2.22 (m, 2H), 2.11 – 2.02 (m, 1H), 2.00 – 1.91 (m, 1H);  $^{13}\text{C}$  NMR (125 MHz,  $\text{CDCl}_3$ )  $\delta$  174.6, 148.2, 145.6 (dm,  $J = 247.0$  Hz), 140.1 (dm,  $J = 251.0$  Hz), 138.6, 137.5 (dm,  $J = 250.9$  Hz), 136.5, 134.2, 128.0, 127.6, 121.7 (2C), 116.6, 111.4 (m), 50.7, 31.2, 30.2, 15.2;  $^{19}\text{F}$  NMR (471 MHz,  $\text{CDCl}_3$ )  $\delta$  -140.9 (dd,  $J = 22.7, 8.0$  Hz, 2F), -156.3 (t,  $J = 20.9$  Hz, 1F), -162.6 (m, 2F); IR (neat)  $\nu$  3349, 2925, 2853, 1684, 1521, 1502, 1486, 1424, 1324, 1123, 986, 826, 792, 734; Ms (ESI):  $m/z = 407.1$   $[\text{M}+\text{H}]^+$ .

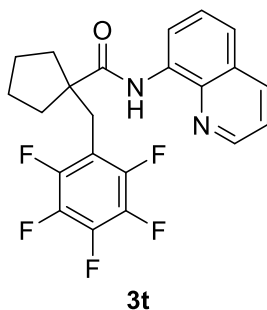

Compound **3t**, colorless oil, yield: 91%,  $R_f = 0.52$  (hexane/EtOAc 5:1).  $^1\text{H}$  NMR (500 MHz,  $\text{CDCl}_3$ )  $\delta$  9.98 (brs, 1H), 8.73 – 8.69 (m, 2H), 8.15 (dd,  $J = 8.3, 1.6$  Hz, 1H), 7.56 – 7.42 (m, 3H), 3.16 (s, 2H), 2.40 – 2.28 (m, 2H), 1.90 – 1.77 (m, 6H);  $^{13}\text{C}$  NMR (125 MHz,  $\text{CDCl}_3$ )  $\delta$  174.0, 148.2, 145.7 (dm,  $J = 245.0$  Hz), 140.1 (dm,  $J = 250.9$  Hz), 138.6, 137.5 (dm,  $J = 251.1$  Hz), 136.5, 134.4, 128.0, 127.6, 121.7, 121.6, 116.6, 111.9 (m), 57.5, 35.0, 31.1, 23.6;  $^{19}\text{F}$  NMR (471 MHz,  $\text{CDCl}_3$ )  $\delta$  -140.4 (dd,  $J = 22.7, 7.9$  Hz, 2F), -156.6 (t,  $J = 20.9$  Hz, 1F), -162.9 (m, 2F); IR (neat)  $\nu$  3354, 3050, 2961, 2878, 1682, 1521, 1424, 1385, 1324, 1123, 1022, 964, 826, 792, 757, 737; Ms (ESI):  $m/z = 421.1$   $[\text{M}+\text{H}]^+$ .

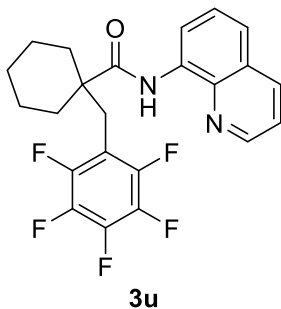

Compound **3u**, colorless oil, yield: 62%,  $R_f = 0.53$  (hexane/EtOAc 5:1).  $^1\text{H}$  NMR (500 MHz,  $\text{CDCl}_3$ )  $\delta$  10.12 (brs, 1H), 8.75 – 8.71 (m, 2H), 8.17 (dd,  $J = 8.3, 1.6$  Hz,

1H), 7.58 – 7.50 (m, 2H), 7.45 (dd,  $J = 8.3, 4.2$  Hz, 1H), 2.99 (s, 2H), 2.42 – 2.32 (m, 2H), 1.80 – 1.72 (m, 2H), 1.70 – 1.63 (m, 1H), 1.54 – 1.45 (m, 4H), 1.34 – 1.27 (m, 1H);  $^{13}\text{C}$  NMR (125 MHz,  $\text{CDCl}_3$ )  $\delta$  172.6, 148.3, 145.8 (dm,  $J = 237.4$  Hz), 140.0 (dm,  $J = 250.9$  Hz), 138.8, 137.4 (dm,  $J = 244.0$  Hz), 136.5, 134.4, 128.0, 127.7, 121.7, 121.6, 116.8, 111.1 (m), 49.8, 38.9, 34.4, 25.8, 23.5;  $^{19}\text{F}$  NMR (471 MHz,  $\text{CDCl}_3$ )  $\delta$  -139.6 (dd,  $J = 22.7, 7.8$  Hz, 2F), -156.6 (t,  $J = 20.9$  Hz, 1F), -163.1 (m, 2F); IR (neat)  $\nu$  3358, 2932, 2861, 1727, 1683, 1521, 1503, 1423, 1386, 1324, 1124, 976, 945, 826, 791, 756; Ms (ESI):  $m/z = 435.1$   $[\text{M}+\text{H}]^+$ .

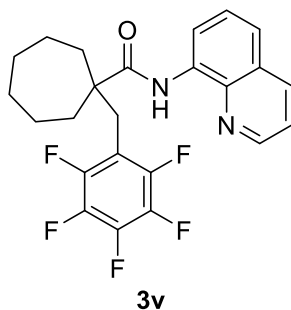

Compound **3v**, colorless oil, yield: 83%,  $R_f = 0.53$  (hexane/EtOAc 5:1).  $^1\text{H}$  NMR (500 MHz,  $\text{CDCl}_3$ )  $\delta$  10.00 (brs, 1H), 8.75 – 8.70 (m, 2H), 8.16 (dd,  $J = 8.3, 1.6$  Hz, 1H), 7.57 – 7.42 (m, 3H), 3.03 (s, 2H), 2.41 – 2.35 (m, 2H), 1.80 – 1.71 (m, 4H), 1.70 – 1.57 (m, 6H);  $^{13}\text{C}$  NMR (125 MHz,  $\text{CDCl}_3$ )  $\delta$  173.9, 148.2, 145.8 (dm,  $J = 247.3$  Hz), 140.1 (dm,  $J = 250.8$  Hz), 138.8, 137.4 (dm,  $J = 250.5$  Hz), 136.5, 134.5, 128.0, 127.7, 121.7, 121.5, 116.7, 111.5 (m), 52.2, 35.9, 34.5, 29.7, 23.6;  $^{19}\text{F}$  NMR (471 MHz,  $\text{CDCl}_3$ )  $\delta$  -139.7 (dd,  $J = 22.7, 7.8$  Hz, 2F), -156.6 (t,  $J = 20.9$  Hz, 1F), -163.1 (m, 2F); IR (neat)  $\nu$  3357, 2929, 2858, 1683, 1521, 1502, 1385, 1326, 1124, 989, 925, 826, 792, 736; Ms (ESI):  $m/z = 449.2$   $[\text{M}+\text{H}]^+$ .

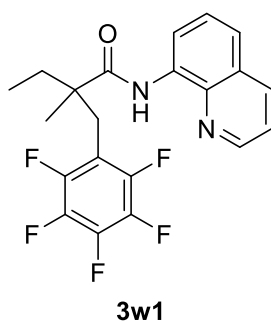

Compound **3w1**, white solid, yield: 73%,  $R_f = 0.50$  (hexane/EtOAc 5:1).  $^1\text{H}$  NMR (500 MHz,  $\text{CDCl}_3$ )  $\delta$  10.16 (brs, 1H), 8.78 – 8.75 (m, 2H), 8.17 (dd,  $J = 8.3, 1.6$  Hz,



1H), 7.57 – 7.43 (m, 2H), 7.45 (dd,  $J = 8.3, 4.2$  Hz, 1H), 3.16 – 3.08 (m, 2H), 2.14 – 2.06 (m, 1H), 1.60 – 1.52 (m, 1H), 1.42 (s, 3H), 1.00 (t,  $J = 7.4$  Hz, 3H);  $^{13}\text{C}$  NMR (125 MHz,  $\text{CDCl}_3$ )  $\delta$  173.7, 148.4, 145.8 (dm,  $J = 244.8$  Hz), 140.1 (dm,  $J = 251.0$  Hz), 138.9, 137.5 (dm,  $J = 252.4$  Hz), 136.5, 134.4, 128.1, 127.6, 121.8, 121.7, 116.6, 111.6 (m), 48.8, 32.8, 31.8, 20.4, 9.4;  $^{19}\text{F}$  NMR (471 MHz,  $\text{CDCl}_3$ )  $\delta$  -139.3 (dd,  $J = 22.6, 7.8$  Hz, 2F), -156.4 (t,  $J = 20.9$  Hz, 1F), -162.8 (m, 2F); IR (neat)  $\nu$  3360, 2971, 1683, 1521, 1502, 1424, 1385, 1324, 1123, 981, 826, 791, 756; Ms (ESI):  $m/z = 409.1$   $[\text{M}+\text{H}]^+$ .

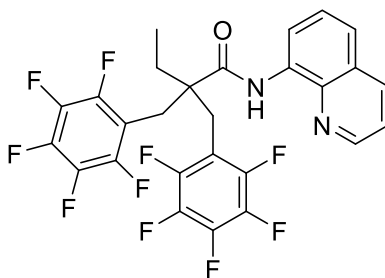

**3w2**

Compound **3w2**, white solid, yield: 12%,  $R_f = 0.54$  (hexane/EtOAc 5:1).  $^1\text{H}$  NMR (500 MHz,  $\text{CDCl}_3$ )  $\delta$  9.58 (brs, 1H), 8.73 (dd,  $J = 7.5, 1.4$  Hz, 1H), 8.53 (dd,  $J = 4.2, 1.6$  Hz, 1H), 8.16 (dd,  $J = 8.3, 1.6$  Hz, 1H), 7.59 – 7.451 (m, 2H), 7.43 (dd,  $J = 8.3, 4.2$  Hz, 1H), 3.28 (d,  $J = 14.2$  Hz, 2H), 3.19 (d,  $J = 14.2$  Hz, 2H), 1.78 (q,  $J = 7.2$  Hz, 2H), 1.16 (t,  $J = 7.3$  Hz, 3H);  $^{13}\text{C}$  NMR (125 MHz,  $\text{CDCl}_3$ )  $\delta$  170.8, 148.0, 146.1 (dm,  $J = 248.0$  Hz), 140.4 (dm,  $J = 251.9$  Hz), 138.4, 137.7 (dm,  $J = 250.9$  Hz), 136.6, 133.7, 128.0, 127.7, 122.0, 121.8, 116.7, 110.9 (m), 52.9, 28.7, 25.9, 9.0;  $^{19}\text{F}$  NMR (471 MHz,  $\text{CDCl}_3$ )  $\delta$  -138.3 (dd,  $J = 22.4, 7.3$  Hz, 4F), -155.4 (t,  $J = 20.9$  Hz, 2F), -162.4 (m, 4F); IR (neat)  $\nu$  3346, 3052, 2981, 2946, 1683, 1505, 1424, 1386, 1325, 1122, 1096, 1009, 890, 826, 792, 739; Ms (ESI):  $m/z = 575.1$   $[\text{M}+\text{H}]^+$ .

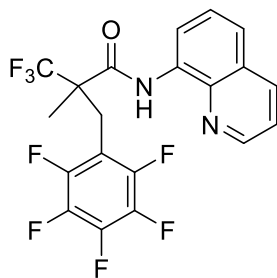

**3x1**

Compound **3x1**, colorless oil, yield: 54%,  $R_f = 0.55$  (hexane/EtOAc 5:1).  $^1\text{H}$  NMR (500 MHz,  $\text{CDCl}_3$ )  $\delta$  10.58 (brs, 1H), 8.79 (dd,  $J = 4.2, 1.7$  Hz, 1H), 8.73 – 8.68 (m, 1H), 8.19 (dd,  $J = 8.3, 1.7$  Hz, 1H), 7.59 – 7.54 (m, 2H), 7.48 (dd,  $J = 8.3, 4.2$  Hz, 1H), 3.52 (d,  $J = 14.5$  Hz, 1H), 3.39 (d,  $J = 14.5$  Hz, 1H), 1.60 (s, 3H);  $^{13}\text{C}$  NMR (125 MHz,  $\text{CDCl}_3$ )  $\delta$  165.3, 148.6, 146.0 (dm,  $J = 246.5$  Hz), 140.8 (dm,  $J = 252.9$  Hz), 138.8, 137.6 (dm,  $J = 251.5$  Hz), 136.5, 133.9, 128.0, 127.5, 126.8 (q,  $J = 281.9$  Hz), 122.6, 121.9, 117.1, 109.1 (m), 53.6 (q,  $J = 24.3$  Hz), 26.7, 16.4;  $^{19}\text{F}$  NMR (471 MHz,  $\text{CDCl}_3$ )  $\delta$  -71.9 (s, 3F), -139.1 (m, 2F), -154.4 (t,  $J = 20.9$  Hz, 1F), -161.9 (m, 2F); IR (neat)  $\nu$  3344, 1695, 1522, 1505, 1328, 1266, 1183, 1099, 992, 976, 826, 791, 756; Ms (ESI):  $m/z = 449.1$   $[\text{M}+\text{H}]^+$ .

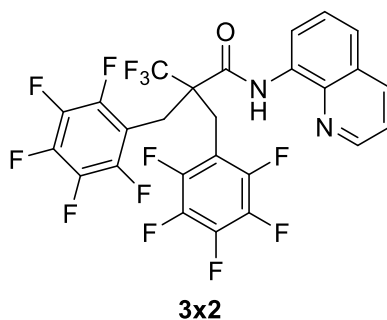

Compound **3x2**, colorless oil, yield: 36%,  $R_f = 0.57$  (hexane/EtOAc 5:1).  $^1\text{H}$  NMR (500 MHz,  $\text{CDCl}_3$ )  $\delta$  10.34 (brs, 1H), 8.73 – 8.68 (m, 1H), 8.62 (dd,  $J = 4.2, 1.6$  Hz, 1H), 8.18 (dd,  $J = 8.3, 1.6$  Hz, 1H), 7.60 – 7.56 (m, 2H), 7.45 (dd,  $J = 8.3, 4.2$  Hz, 1H), 3.60 – 3.52 (m, 4H);  $^{13}\text{C}$  NMR (125 MHz,  $\text{CDCl}_3$ )  $\delta$  163.2, 148.4, 146.2 (dm,  $J = 250.1$  Hz), 141.0 (dm,  $J = 253.5$  Hz), 138.7, 137.7 (dm,  $J = 250.4$  Hz), 136.5, 133.6, 128.0, 127.5, 126.4 (q,  $J = 282.5$  Hz), 122.9, 122.0, 117.6, 109.1 (m), 57.1 (q,  $J = 22.6$  Hz), 26.5;  $^{19}\text{F}$  NMR (471 MHz,  $\text{CDCl}_3$ )  $\delta$  -66.5 (s, 3F), -138.1 (dd,  $J = 14.9, 5.8$  Hz, 4F), -154.2 (t,  $J = 20.9$  Hz, 2F), -162.2 (m, 4F); IR (neat)  $\nu$  3336, 2929, 1694, 1506, 1426, 1388, 1267, 1180, 1068, 955, 827, 792, 741; Ms (ESI):  $m/z = 615.1$   $[\text{M}+\text{H}]^+$ .

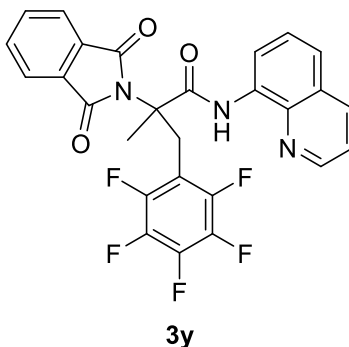

Compound **3y**, white solid, yield: 67%,  $R_f = 0.38$  (hexane/EtOAc 2:1).  $^1\text{H}$  NMR (500 MHz,  $\text{CDCl}_3$ )  $\delta$  10.23 (brs, 1H), 8.72 (dd,  $J = 7.6, 1.1$  Hz, 1H), 8.43 (dd,  $J = 4.2, 1.6$  Hz, 1H), 8.11 (dd,  $J = 8.3, 1.5$  Hz, 1H), 7.84 – 7.79 (m, 2H), 7.78 – 7.74 (m, 2H), 7.59 – 7.49 (m, 2H), 7.34 (dd,  $J = 8.2, 4.2$  Hz, 1H), 3.92 (d,  $J = 14.5$  Hz, 1H), 3.76 (d,  $J = 14.4$  Hz, 1H), 2.13 (s, 3H);  $^{13}\text{C}$  NMR (125 MHz,  $\text{CDCl}_3$ )  $\delta$  170.0, 168.9, 148.3, 146.1 (dm,  $J = 246.9$  Hz), 140.5 (dm,  $J = 252.6$  Hz), 138.7, 137.6 (dm,  $J = 251.0$  Hz), 136.5, 134.6, 134.0, 131.6, 128.0, 127.5, 123.6, 122.0, 121.7, 116.8, 110.2 (m), 65.2, 28.3, 22.5;  $^{19}\text{F}$  NMR (471 MHz,  $\text{CDCl}_3$ )  $\delta$  -140.6 (dd,  $J = 21.8, 6.4$  Hz, 2F), -154.4 (t,  $J = 20.9$  Hz, 1F), -161.7 (m, 2F); IR (neat)  $\nu$  3338, 2924, 1716, 1696, 1522, 1502, 1321, 1124, 987, 909, 825, 792, 721; Ms (ESI):  $m/z = 526.1$   $[\text{M}+\text{H}]^+$ .

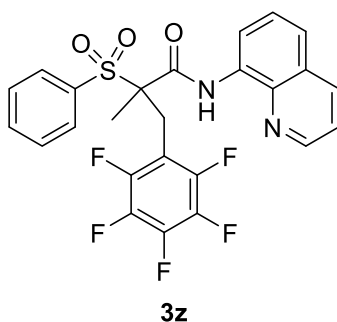

Compound **3z**, yellow solid, yield: 76%,  $R_f = 0.49$  (hexane/EtOAc 3:1).  $^1\text{H}$  NMR (500 MHz,  $\text{CDCl}_3$ )  $\delta$  11.64 (brs, 1H), 8.98 (dd,  $J = 4.2, 1.6$  Hz, 1H), 8.53 (dd,  $J = 7.6, 1.1$  Hz, 1H), 8.22 (dd,  $J = 8.3, 1.6$  Hz, 1H), 7.98 (dd,  $J = 8.4, 1.1$  Hz, 2H), 7.64 – 7.58 (m, 2H), 7.55 – 7.50 (m, 2H), 7.47 – 7.43 (m, 2H), 3.97 (d,  $J = 14.2$  Hz, 1H), 3.74 (d,  $J = 14.2$  Hz, 1H), 1.59 (s, 3H);  $^{13}\text{C}$  NMR (125 MHz,  $\text{CDCl}_3$ )  $\delta$  163.8, 149.1, 145.9 (dm,  $J = 251.4$  Hz), 140.9 (dm,  $J = 253.1$  Hz), 137.7 (dm,  $J = 251.9$  Hz), 139.3, 136.4, 135.1, 134.8, 134.2, 130.7, 129.4, 128.2, 127.3, 122.8, 122.0, 117.4, 108.5 (m), 72.4, 26.6, 17.1;  $^{19}\text{F}$  NMR (471 MHz,  $\text{CDCl}_3$ )  $\delta$  -138.4 (dd,  $J = 21.8, 6.7$  Hz, 2F), -153.8 (t,  $J = 20.9$  Hz, 1F), -161.4 (m, 2F); IR (neat)  $\nu$  3273, 2964, 1684, 1522, 1505, 1325, 1308, 1146, 991, 912, 827, 792, 738; Ms (ESI):  $m/z = 521.1$   $[\text{M}+\text{H}]^+$ .

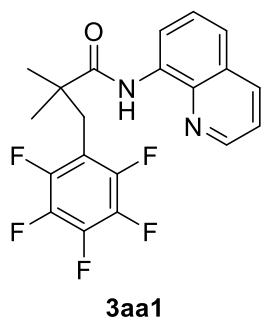

Compound **3aa1**, white solid, yield: 62%,  $R_f = 0.47$  (hexane/EtOAc 5:1).  $^1\text{H}$  NMR (500 MHz,  $\text{CDCl}_3$ )  $\delta$  10.23 (brs, 1H), 8.78 – 8.74 (m, 2H), 8.17 (dd,  $J = 8.3, 1.5$  Hz, 1H), 7.57 – 7.50 (m, 2H), 7.46 (dd,  $J = 8.2, 4.2$  Hz, 1H), 3.14 (s, 2H), 1.45 (s, 6H);  $^{13}\text{C}$  NMR (125 MHz,  $\text{CDCl}_3$ )  $\delta$  174.6, 148.4, 145.8 (dm,  $J = 242.9$  Hz), 140.1 (dm,  $J = 251.1$  Hz), 138.9, 137.6 (dm,  $J = 244.3$  Hz), 136.5, 134.4, 128.1, 127.6, 121.8, 121.7, 116.6, 111.6 (m), 44.9, 33.1, 24.8;  $^{19}\text{F}$  NMR (471 MHz,  $\text{CDCl}_3$ )  $\delta$  -139.6 (dd,  $J = 22.6, 7.7$  Hz, 2F), -156.2 (t,  $J = 20.8$  Hz, 1F), -162.7 (m, 2F); IR (neat)  $\nu$  3360, 2971, 1683, 1521, 1504, 1424, 1385, 1325, 1123, 977, 917, 826, 792, 733; Ms (ESI):  $m/z = 395.1$   $[\text{M}+\text{H}]^+$ .

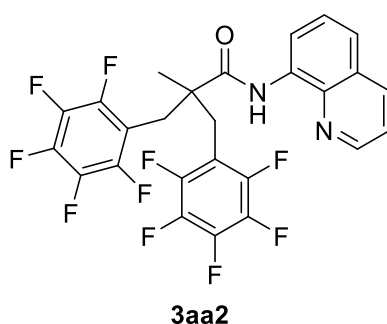

Compound **3aa2**, colorless oil, yield: 30%,  $R_f = 0.51$  (hexane/EtOAc 5:1).  $^1\text{H}$  NMR (500 MHz,  $\text{CDCl}_3$ )  $\delta$  9.95 (brs, 1H), 8.73 (dd,  $J = 7.2, 1.7$  Hz, 1H), 8.65 (dd,  $J = 4.2, 1.6$  Hz, 1H), 8.17 (dd,  $J = 8.3, 1.6$  Hz, 1H), 7.59 – 7.53 (m, 2H), 7.44 (dd,  $J = 8.3, 4.2$  Hz, 1H), 3.36 (d,  $J = 14.0$  Hz, 2H), 3.17 (d,  $J = 14.0$  Hz, 2H), 1.42 (s, 3H);  $^{13}\text{C}$  NMR (125 MHz,  $\text{CDCl}_3$ )  $\delta$  171.8, 148.3, 145.8 (dm,  $J = 248.1$  Hz), 140.4 (dm,  $J = 251.6$  Hz), 138.7, 137.7 (dm,  $J = 249.9$  Hz), 136.6, 133.8, 128.0, 127.6, 122.2, 121.8, 117.0, 110.9 (m), 49.0, 31.9, 19.6;  $^{19}\text{F}$  NMR (471 MHz,  $\text{CDCl}_3$ )  $\delta$  -138.8 (dd,  $J = 22.4, 7.5$  Hz, 4F), -155.2 (t,  $J = 20.9$  Hz, 2F), -162.0 (m, 4F); IR (neat)  $\nu$  3355, 2976, 1684, 1522, 1503, 1424, 1386, 1325, 1121, 985, 944, 826, 792, 736; Ms (ESI):  $m/z = 561.1$   $[\text{M}+\text{H}]^+$ .

## Deuterium Labeling Experiment

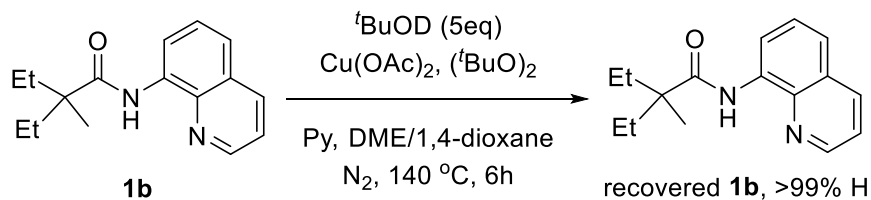

A 50 mL Schlenk tube was charged with amide **1b** (76.8 mg, 0.30 mmol), Cu(OAc)<sub>2</sub> (54.5 mg, 0.30 mmol), DME/1,4-dioxane (7:3, v/v, 1.0 mL), pyridine (72 μL, 71 mg, 0.90 mmol), *tert*-butyl peroxide (138 μL, 110 mg, 0.75 mmol) and *tert*-butan(ol-*d*) (99% D, 143 μL, 113 mg, 1.5 mmol) in sequence under N<sub>2</sub> atmosphere. The tube was capped with a Teflon screw cap, and stirred at 140 °C for 6h. Then the reaction mixture was cooled to room temperature, diluted with EtOAc (30 mL), filtered through a celite pad, and concentrated under reduced pressure. The residue was purified by flash column chromatography on silica gel, eluting with EtOAc/Hexane (1:30, v/v), to afford recovered **1b** (72.4 mg, 94% yield).

Recovered **1b**: <sup>1</sup>H NMR (500 MHz, CDCl<sub>3</sub>) δ 10.22 (brs, 1H), 8.84 – 8.81 (m, 2H), 8.15 (dd, *J* = 8.3, 1.7 Hz, 1H), 7.55 – 7.42 (m, 3H), 1.93 – 1.85 (m, 2H), 1.67 – 1.59 (m, 2H), 1.35 (s, **3H**), 0.94 (t, *J* = 7.5 Hz, 6H).

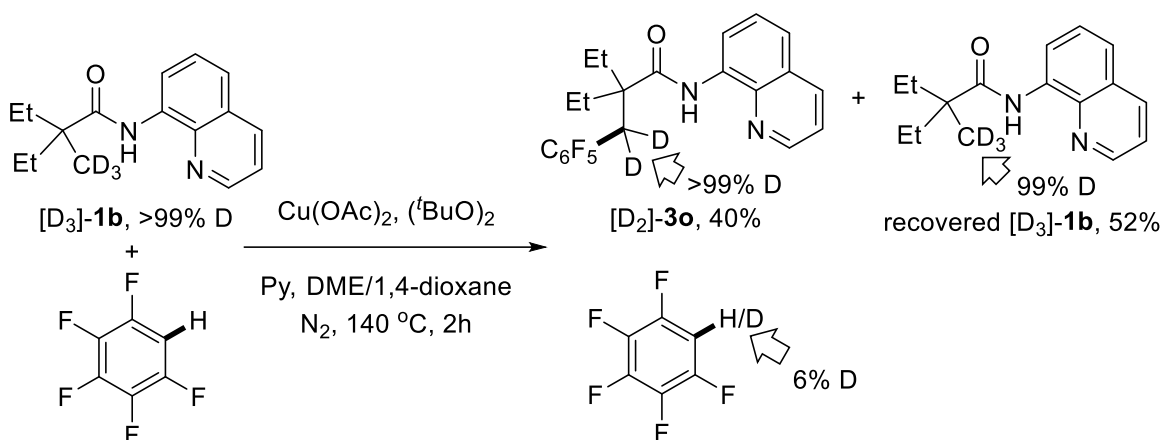

A 50 mL Schlenk tube was charged with [D<sub>3</sub>]-**1b** (77.7 mg, 0.30 mmol), Cu(OAc)<sub>2</sub> (54.5 mg, 0.30 mmol), DME/1,4-dioxane (7:3, v/v, 1.0 mL), pyridine (72 μL, 71 mg, 0.90 mmol), *tert*-butyl peroxide (138 μL, 110 mg, 0.75 mmol) and pentafluorobenzene (67 μL, 101 mg, 0.60 mmol) in sequence under N<sub>2</sub> atmosphere. The tube was capped with a Teflon screw cap, and stirred at 140 °C for 2h. Then the reaction mixture was cooled to room temperature, and analyzed by GC-MS to obtain the rate of H/D exchange of pentafluorobenzene. The resultant mixture was diluted with EtOAc (30 mL), filtered through a celite pad, and concentrated under reduced pressure. The residue was purified by flash column chromatography on silica gel, eluting with CH<sub>2</sub>Cl<sub>2</sub>/Hexane (1:2, v/v), to afford [D<sub>2</sub>]-**3o** (50.9 mg, 40% yield) and recovered [D<sub>3</sub>]-**1b** (40.4 mg, 52% yield).

[D<sub>2</sub>]-**3o**: <sup>1</sup>H NMR (500 MHz, CDCl<sub>3</sub>) δ 10.03 (brs, 1H), 8.74 – 8.71 (m, 2H), 8.16 (dd, *J* = 8.3, 1.6 Hz, 1H), 7.57 – 7.49 (m, 2H), 7.45 (dd, *J* = 8.3, 4.2 Hz, 1H), 1.97 – 1.89 (m, 2H), 1.85 – 1.77 (m, 2H), 1.04 (t, *J* = 7.4 Hz, 6H); <sup>13</sup>C NMR (125 MHz, CDCl<sub>3</sub>) δ 173.3, 148.2, 146.0 (dm, *J* = 244.8 Hz), 140.0 (dm, *J* = 250.6 Hz), 138.8,

137.4 (dm,  $J = 242.9$  Hz), 136.5, 134.4, 128.0, 127.7, 121.7, 121.6, 116.7, 111.6 (m), 51.8, 26.6, 8.7;  $^{19}\text{F}$  NMR (471 MHz,  $\text{CDCl}_3$ )  $\delta$  -139.4 (dd,  $J = 22.6, 7.9$  Hz, 2F), -156.6 (t,  $J = 20.9$  Hz, 1F), -163.1 (m, 2F); IR (neat)  $\nu$  3361, 2971, 1683, 1521, 1496, 1424, 1385, 1325, 1009, 922, 826, 791, 757; Ms (ESI):  $m/z = 425.2$   $[\text{M}+\text{H}]^+$ .

Recovered  $[\text{D}_3]$ -**1b**:  $^1\text{H}$  NMR (500 MHz,  $\text{CDCl}_3$ )  $\delta$  10.22 (brs, 1H), 8.84 – 8.81 (m, 2H), 8.15 (dd,  $J = 8.3, 1.6$  Hz, 1H), 7.55 – 7.41 (m, 3H), 1.93 – 1.85 (m, 2H), 1.67 – 1.59 (m, 2H), 1.32 – 1.28 (m, **0.04H**), 0.94 (t,  $J = 7.5$  Hz, 6H).

### Parallel KIE Experiment

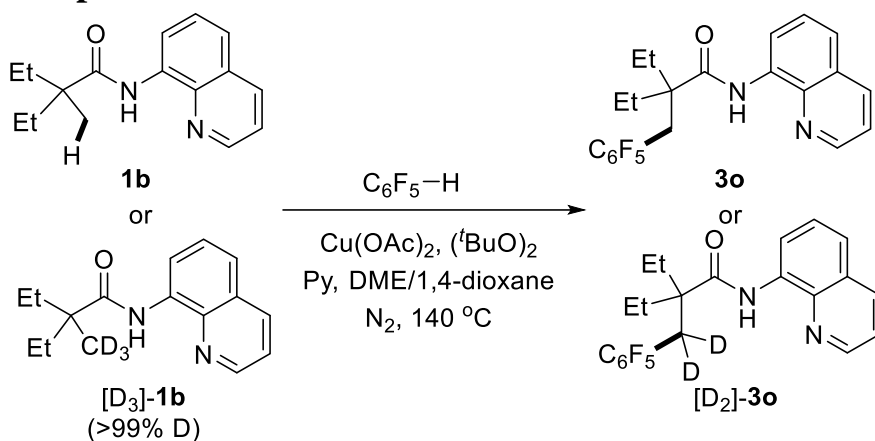

A 50 mL Schlenk tube was charged with **1b** (76.8 mg, 0.30 mmol) or  $[\text{D}_3]$ -**1b** (77.7 mg, 0.30 mmol),  $\text{Cu}(\text{OAc})_2$  (54.5 mg, 0.30 mmol), DME/1,4-dioxane (7:3, v/v, 1.0 mL), pyridine (72  $\mu\text{L}$ , 71 mg, 0.90 mmol), *tert*-butyl peroxide (138  $\mu\text{L}$ , 110 mg, 0.75 mmol) and pentafluorobenzene (67  $\mu\text{L}$ , 101 mg, 0.60 mmol) in sequence under  $\text{N}_2$  atmosphere. The tube was capped with a Teflon screw cap, and stirred at  $140^\circ\text{C}$  for 2h. The reaction was stopped by rapid cooling in the indicated reaction period, and analyzed by GC using benzophenone as the internal standard. The average GC yield was calculated after calibrating the response of GC based on five runs of each reaction. The KIE value determined from two parallel reactions is 1.1.

| Time (min)                              | 10  | 20  | 30  | 40  | 50   | 60   | 70   | 80   | 90   |
|-----------------------------------------|-----|-----|-----|-----|------|------|------|------|------|
| Yield of <b>3o</b> (%)                  | 0.1 | 0.8 | 3.3 | 6.8 | 8.2  | 14.8 | 20.9 | 28.5 | 48.0 |
| Yield of $[\text{D}_2]$ - <b>3o</b> (%) | 0.1 | 1.1 | 2.2 | 4.2 | 10.2 | 12.6 | 19.5 | 32.0 | 38.5 |

## References

1. (a) Tran, L. D.; Daugulis, O. *Angew. Chem. Int. Ed.* **2012**, *51*, 5188. (b) Shang, R.; Ilies, L.; Matsumoto, A.; Nakamura, E. *J. Am. Chem. Soc.* **2013**, *135*, 6030. (c) Wu, X.; Zhao, Y.; Ge, H. *J. Am. Chem. Soc.* **2014**, *136*, 1789. (d) Wu, X.; Zhao, Y.; Zhang, G.; Ge, H. *Angew. Chem. Int. Ed.* **2014**, *53*, 3706. (e) Wu, X.; Zhao, Y.; Ge, H. *Chem. Eur. J.* **2014**, *20*, 9530. (f) Wu, X.; Yang, K.; Zhao, Y.; Sun, H.; Li, G.; Ge, H. *Nat. Commun.* **2015**, *6*, 6462.
2. Wu, X.; Zhao, Y.; Ge, H. *Chem. Asian J.* **2014**, *9*, 2736.

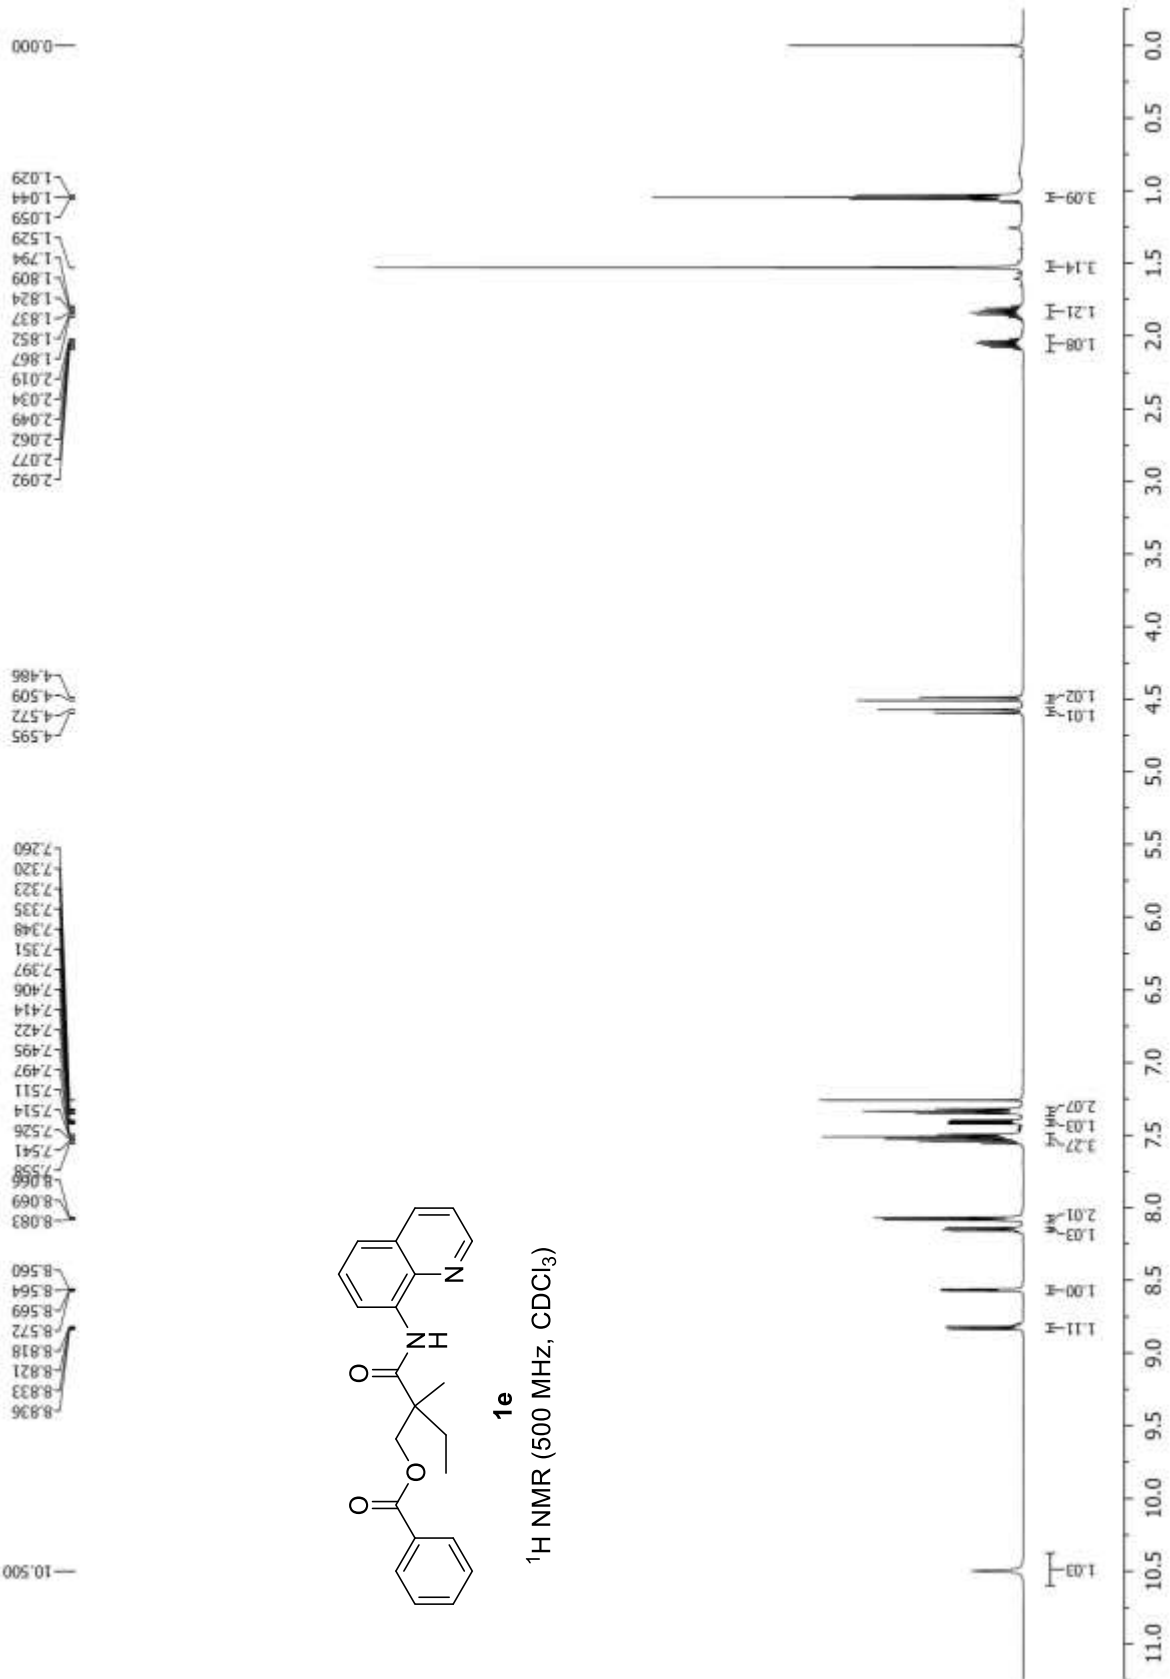



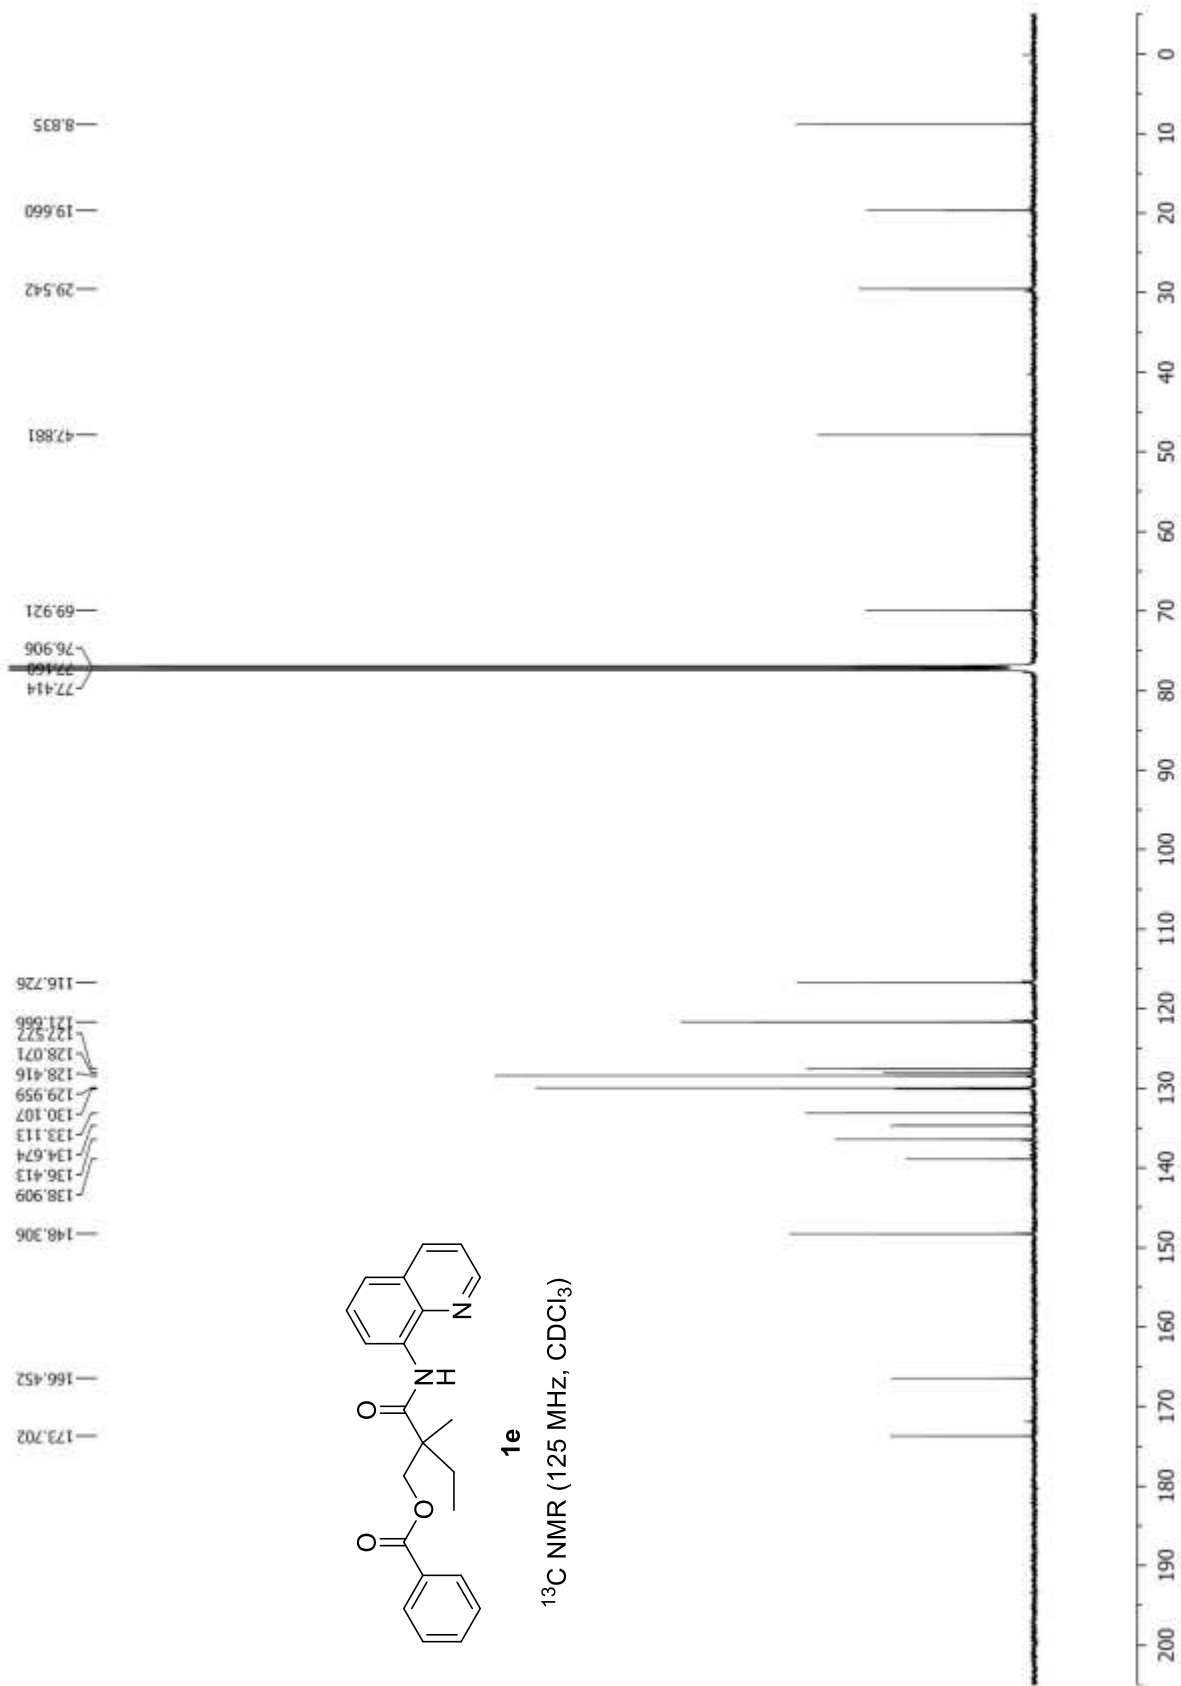

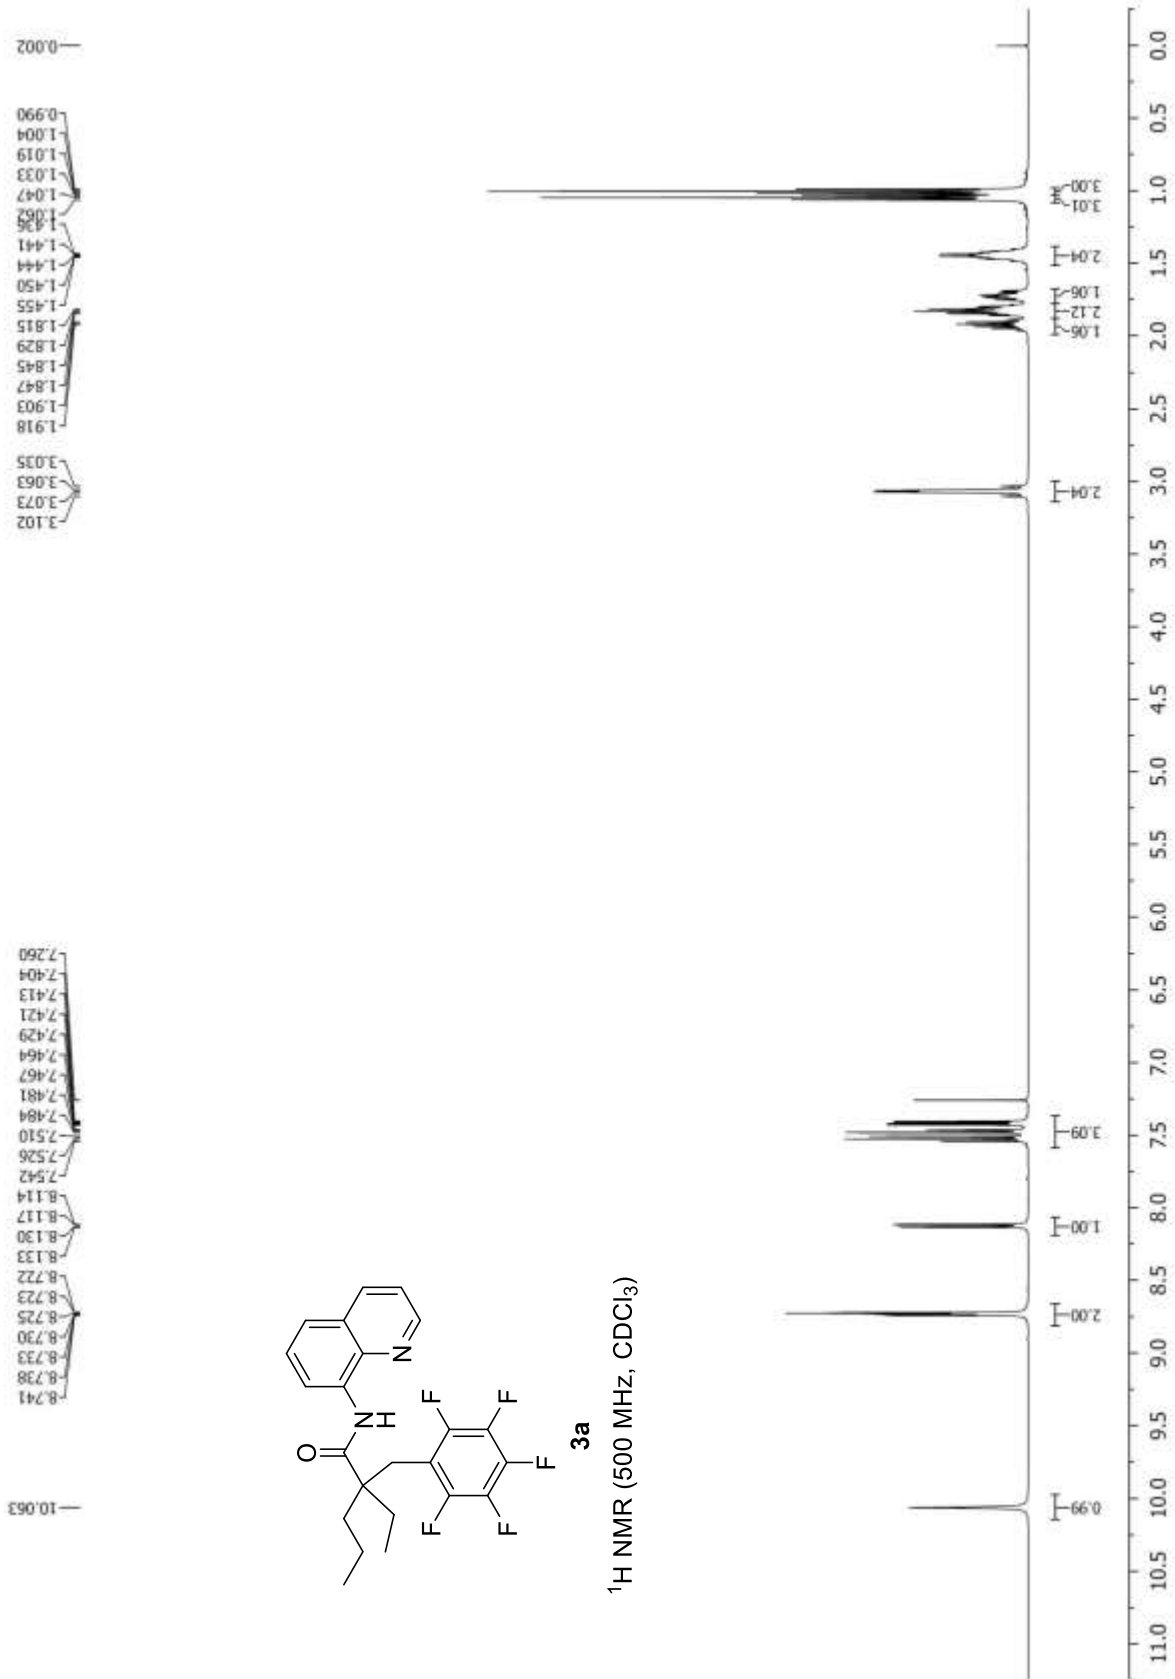

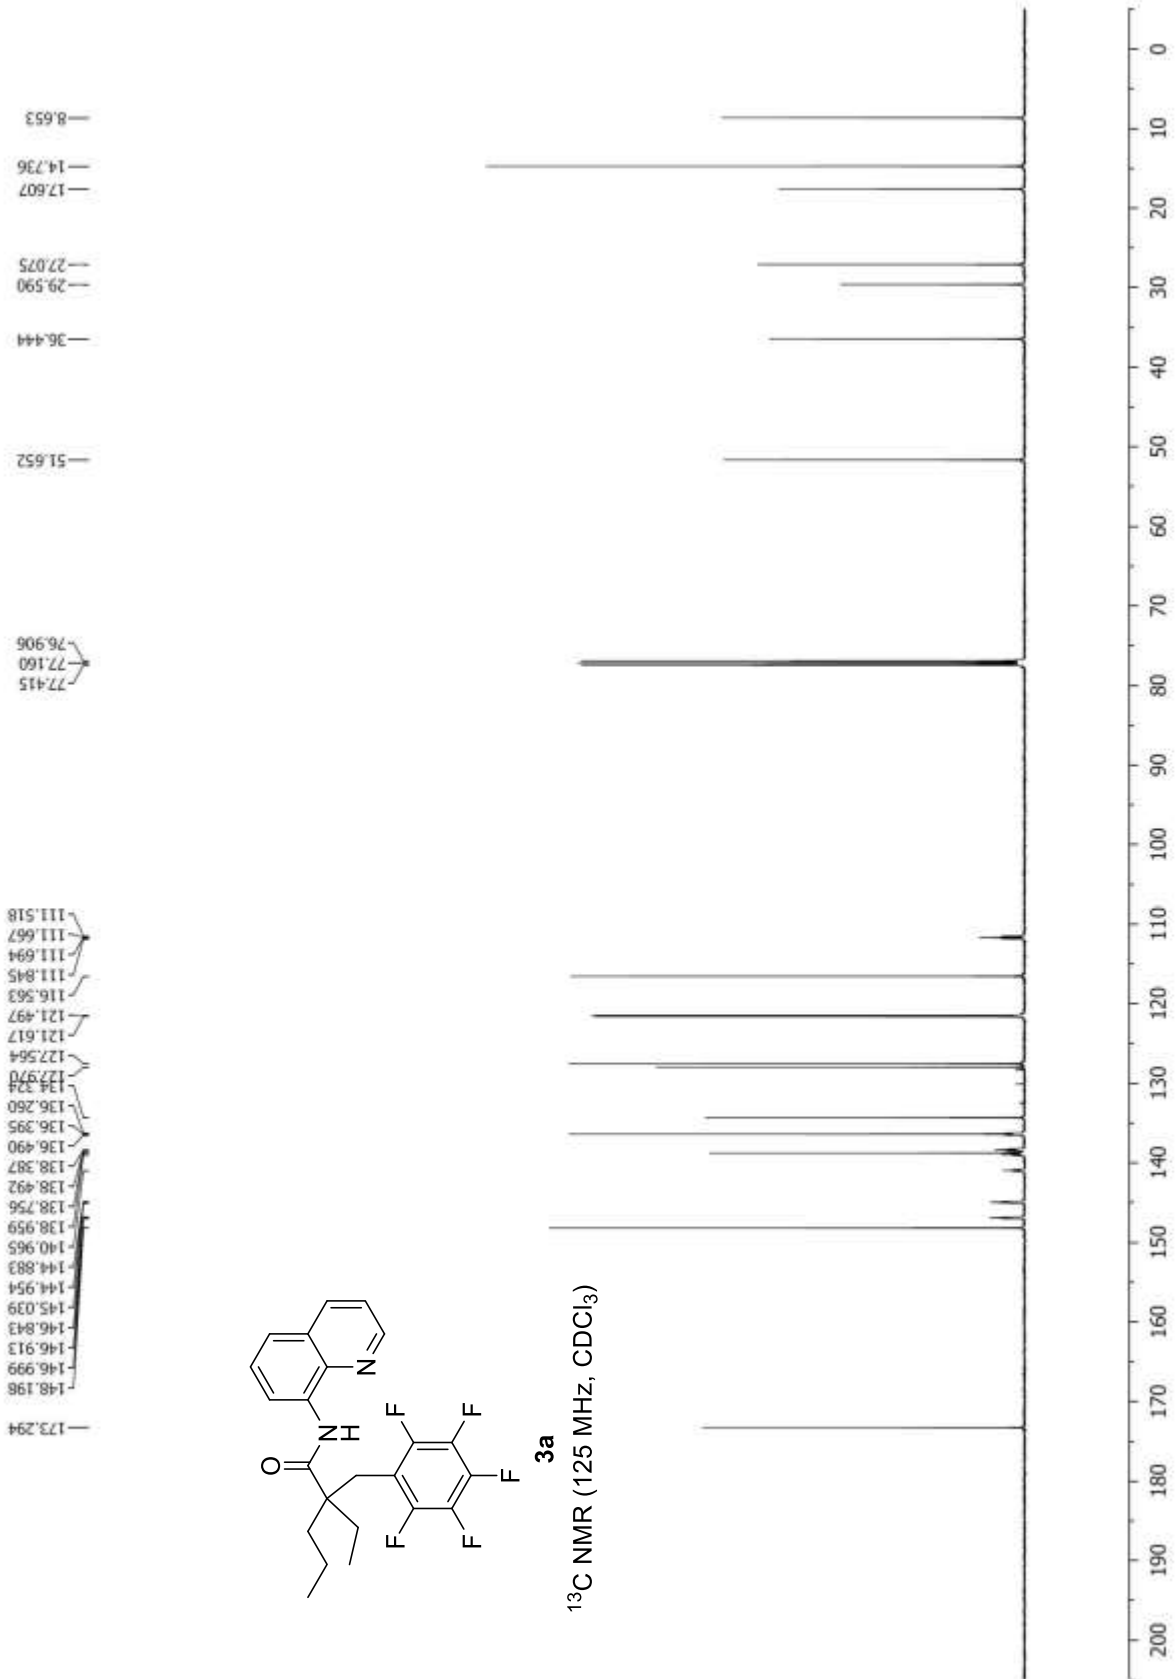

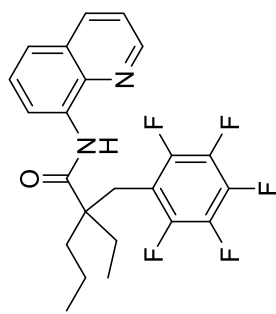

**3a**

<sup>19</sup>F NMR (471 MHz, CDCl<sub>3</sub>)

156.633  
156.677  
156.722  
163.115  
163.130  
163.161  
163.176  
163.206  
163.222

139.529  
139.544  
139.576  
139.592

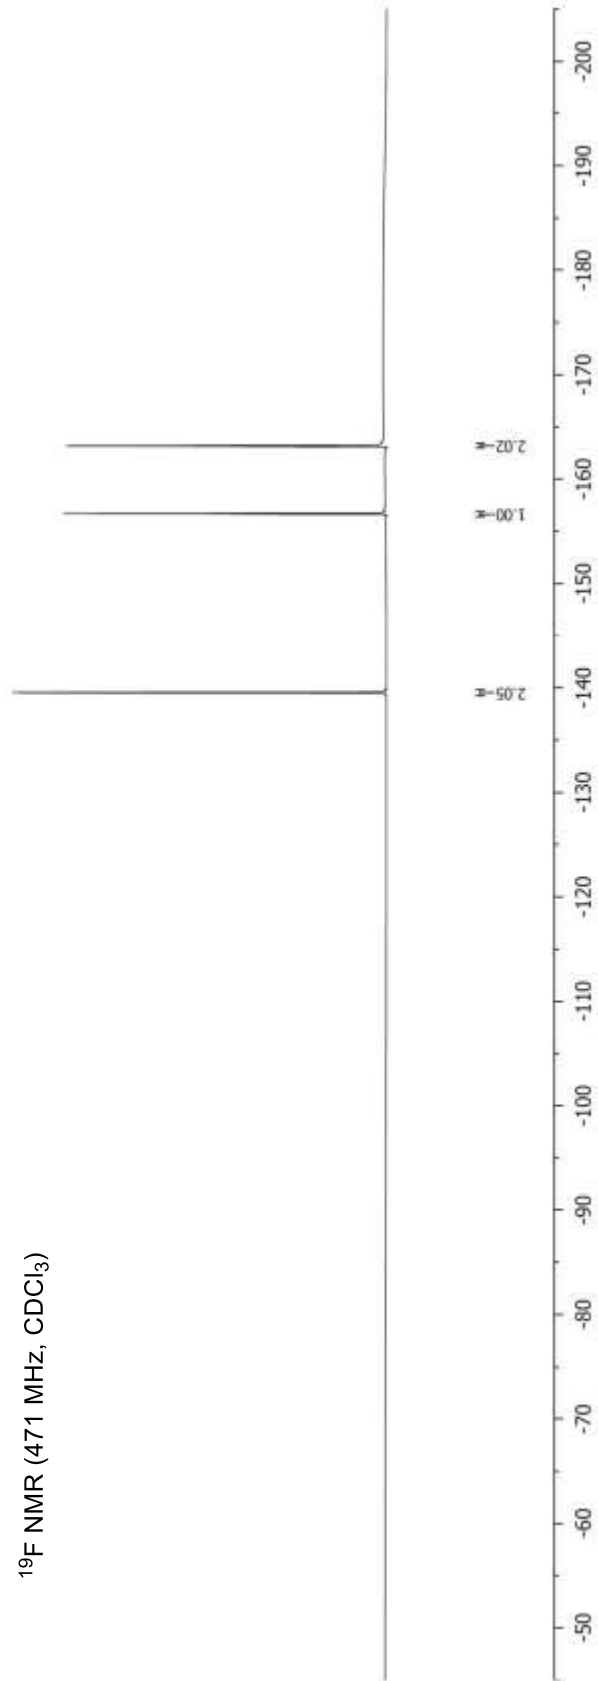

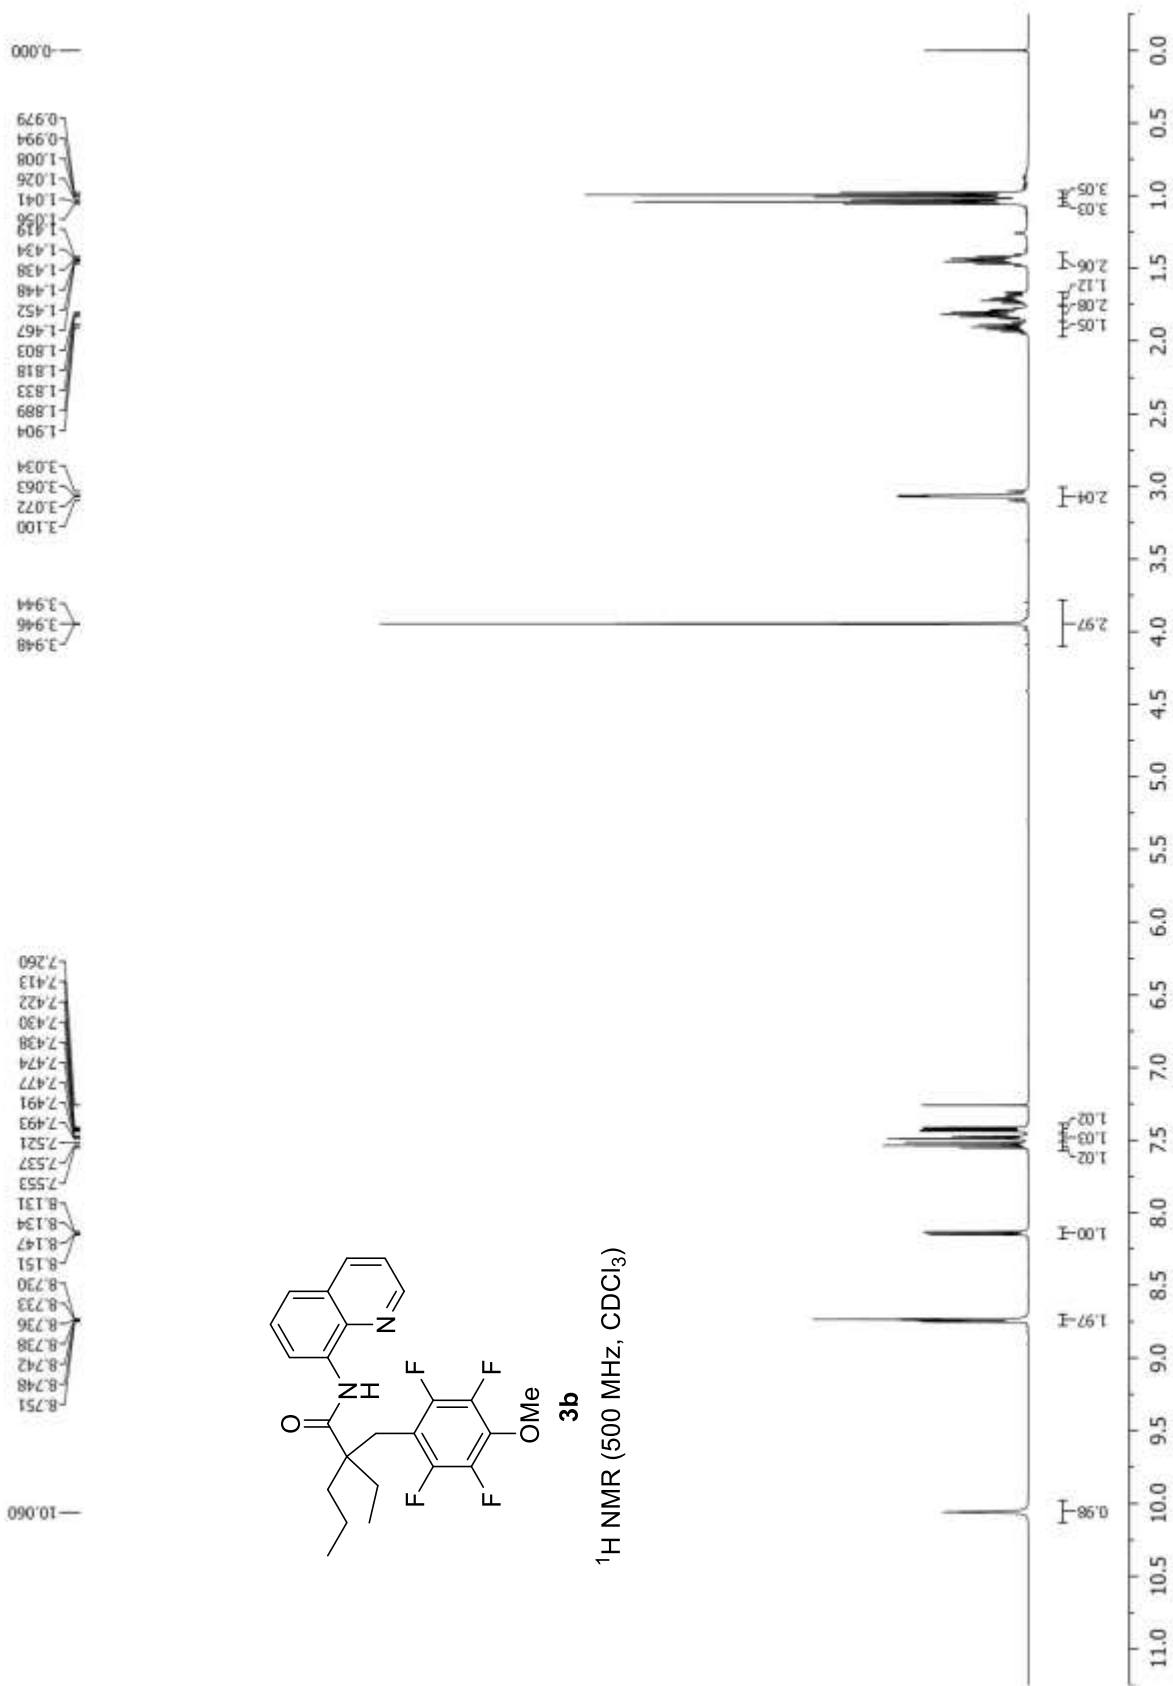

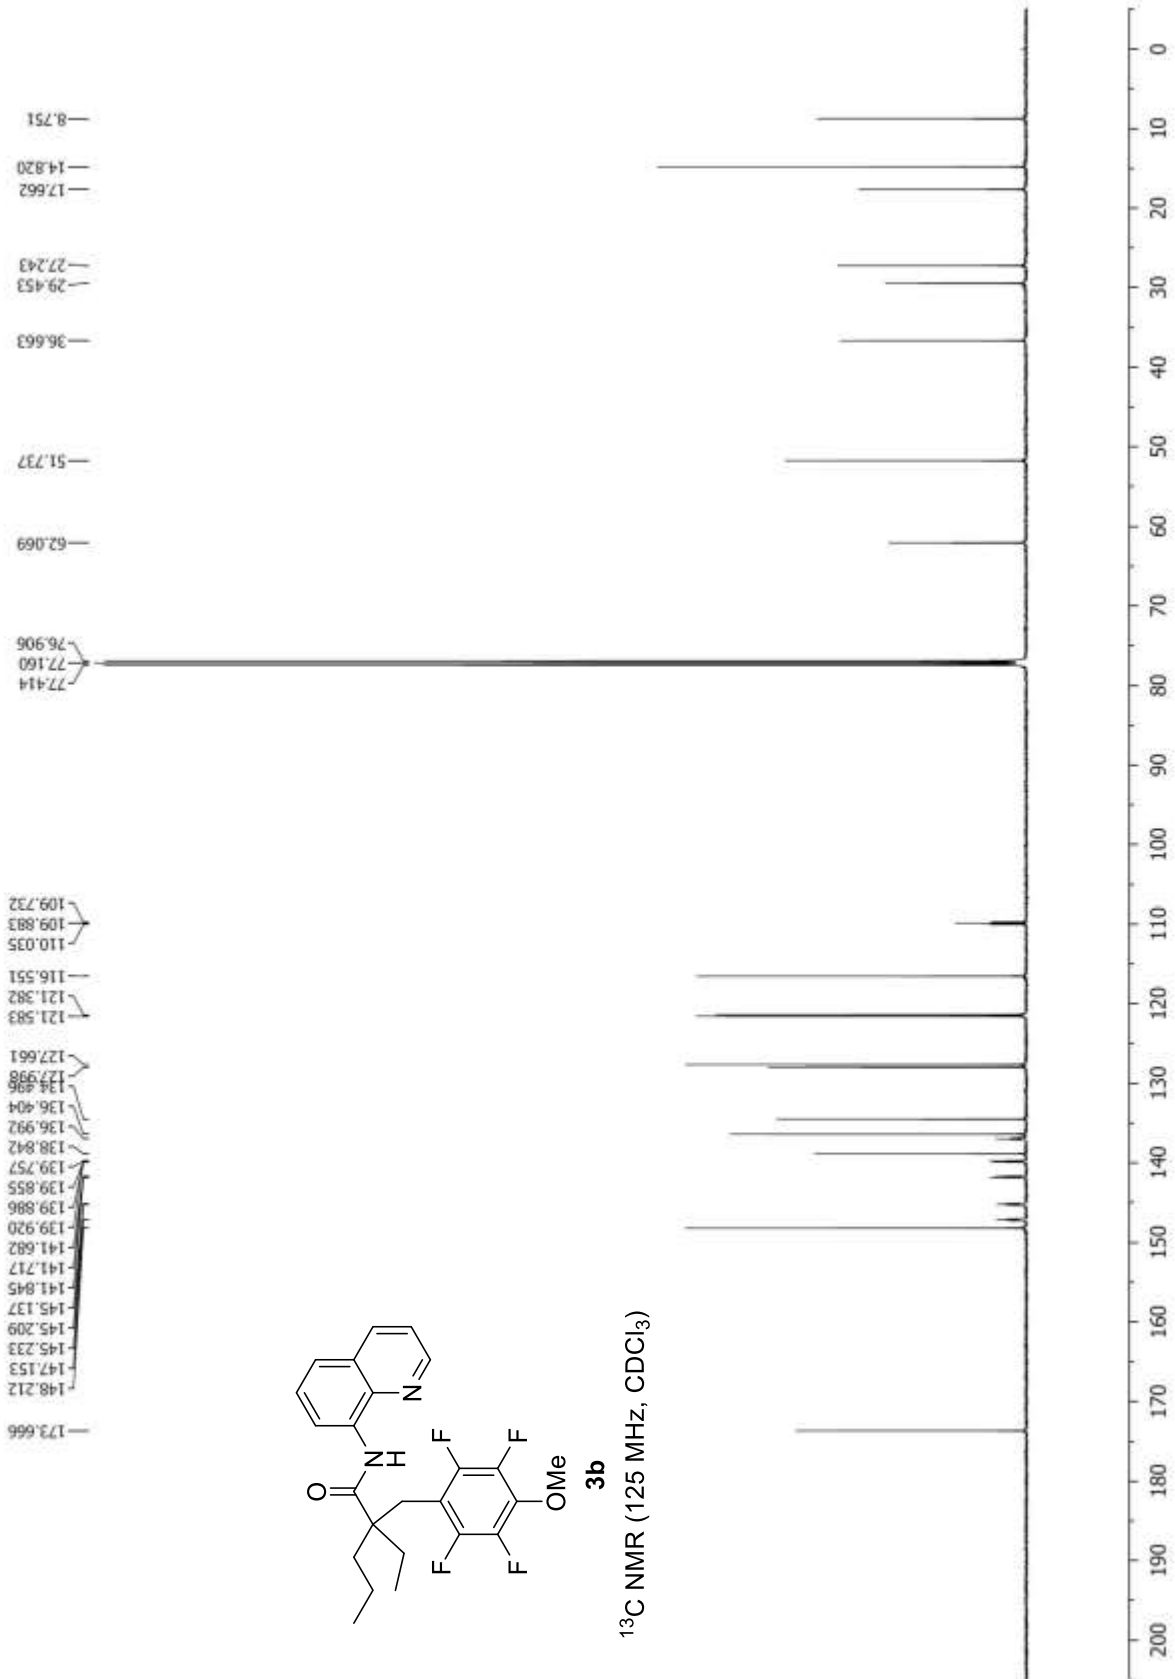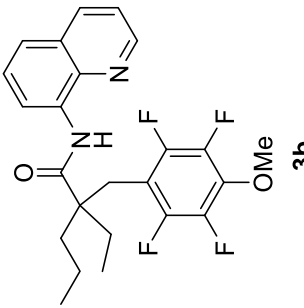

<sup>13</sup>C NMR (125 MHz, CDCl<sub>3</sub>)

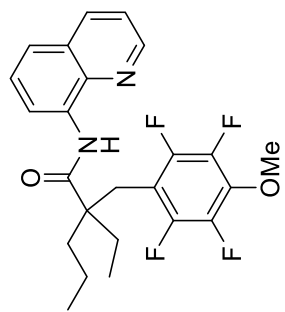

**3b**

$^{19}\text{F}$  NMR (471 MHz,  $\text{CDCl}_3$ )

159.006  
158.988  
158.959  
158.942

141.339  
141.322  
141.293  
141.276

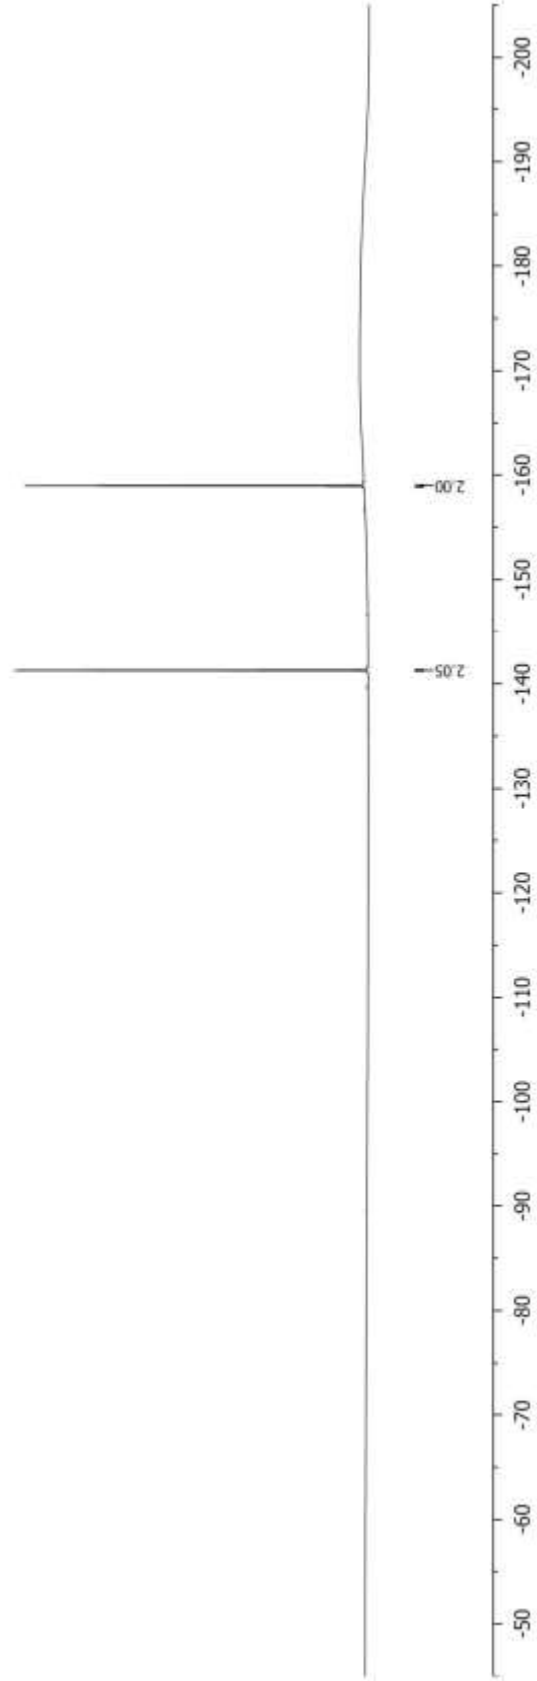

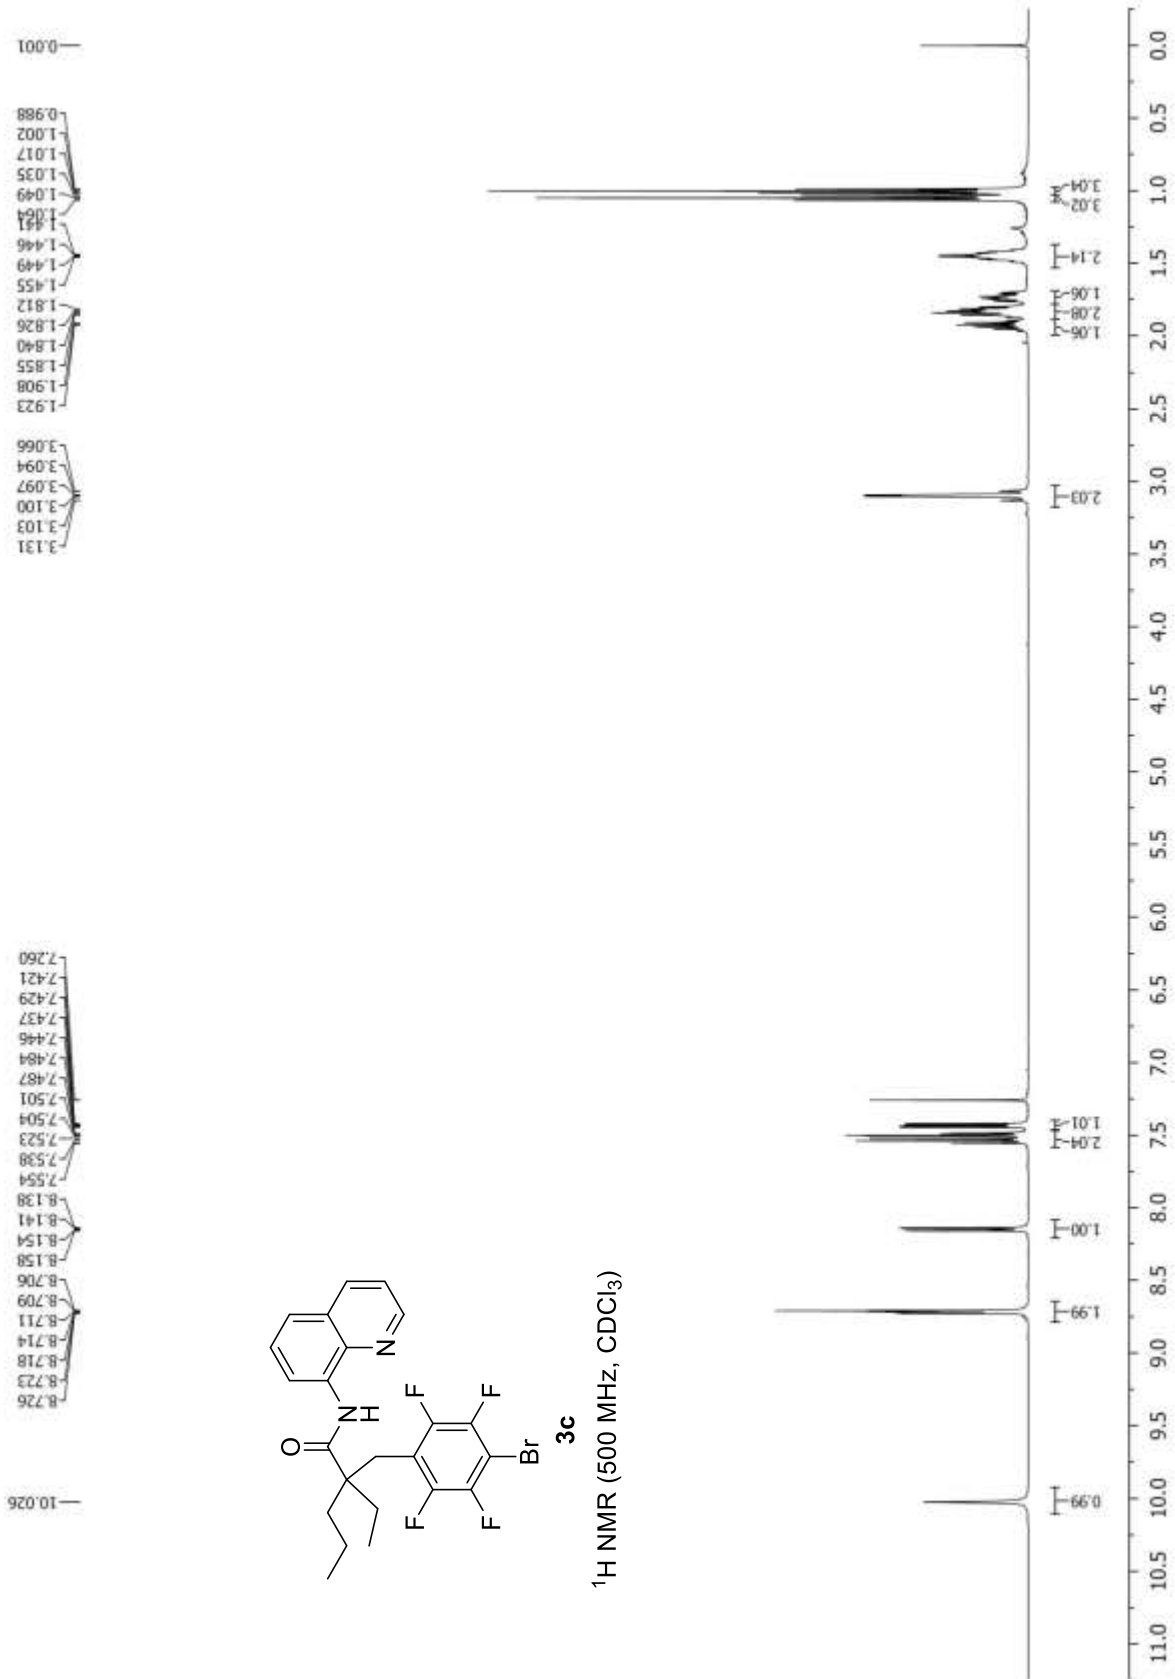



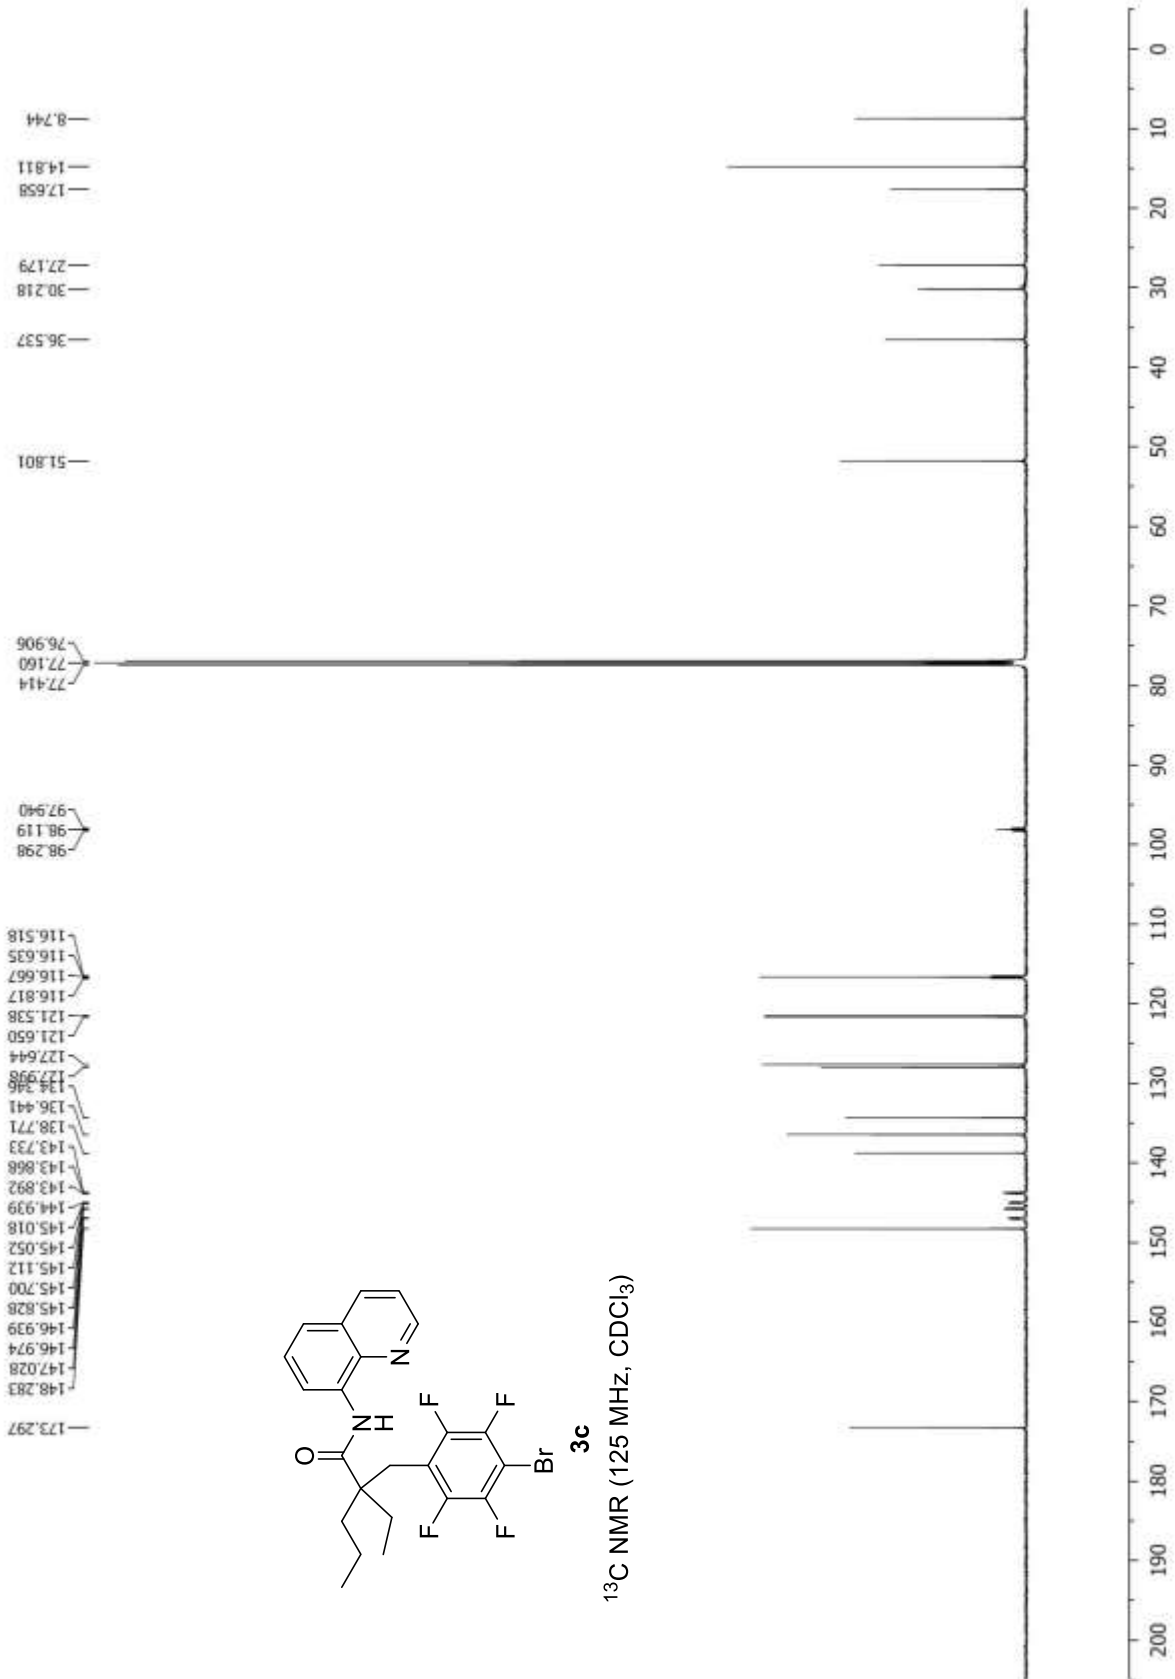

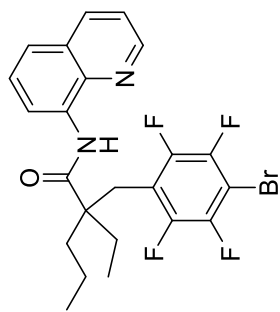

**3c**

<sup>19</sup>F NMR (471 MHz, CDCl<sub>3</sub>)

134.592  
134.601  
134.618  
134.645  
134.662  
134.670  
138.212  
138.230  
138.258  
138.276

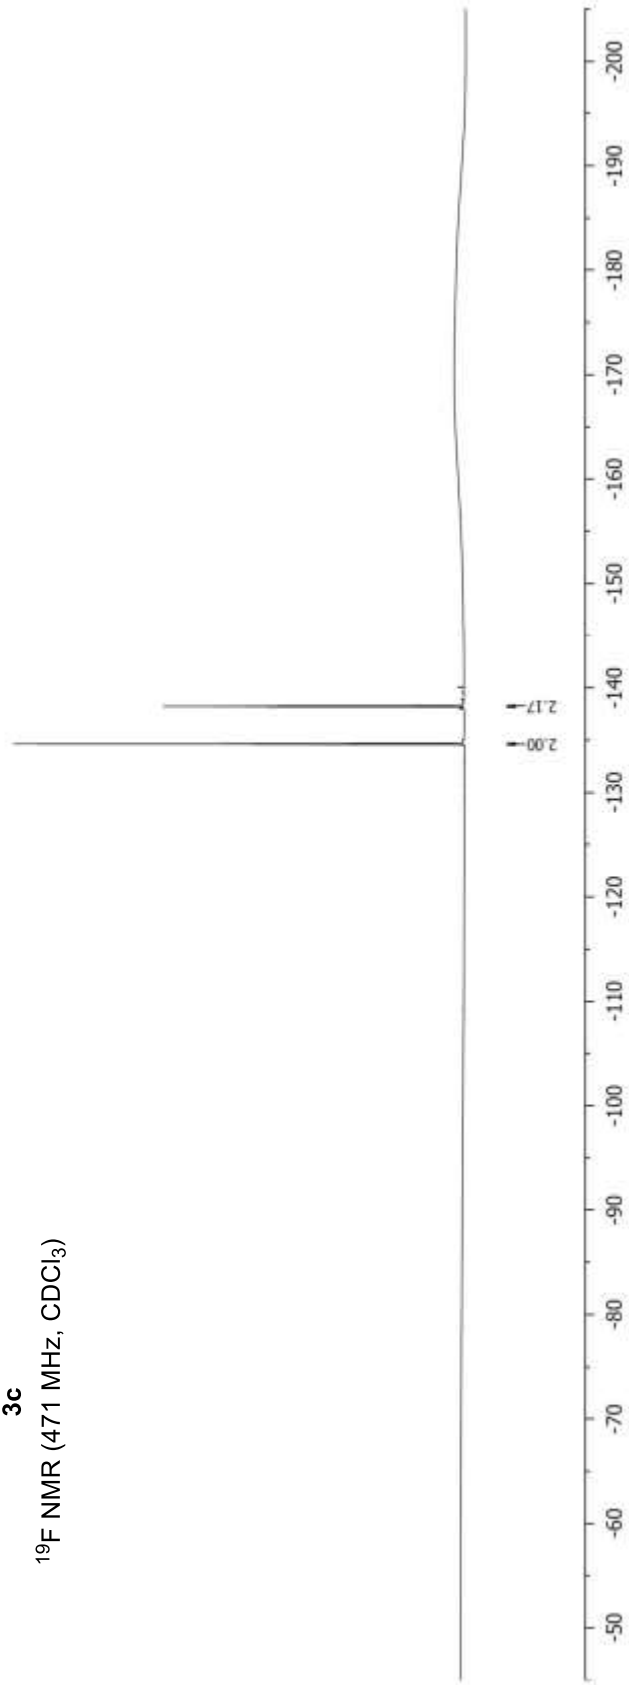

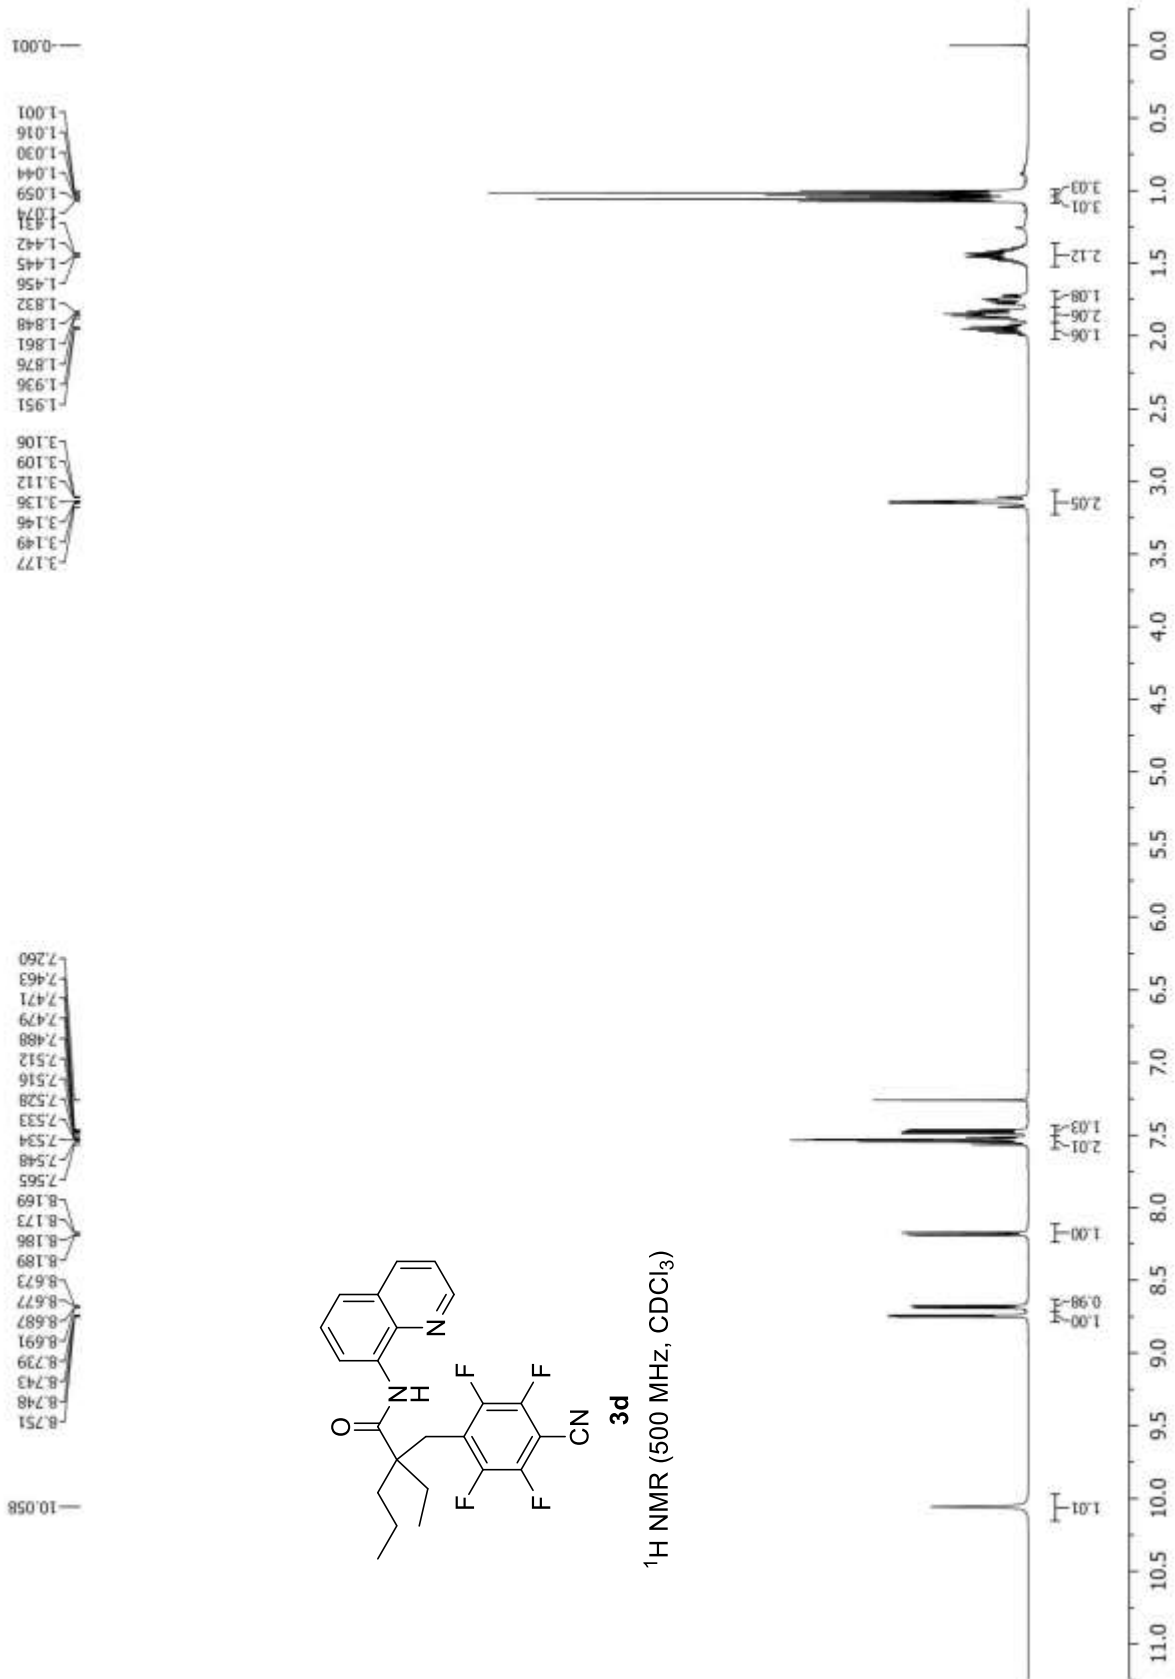

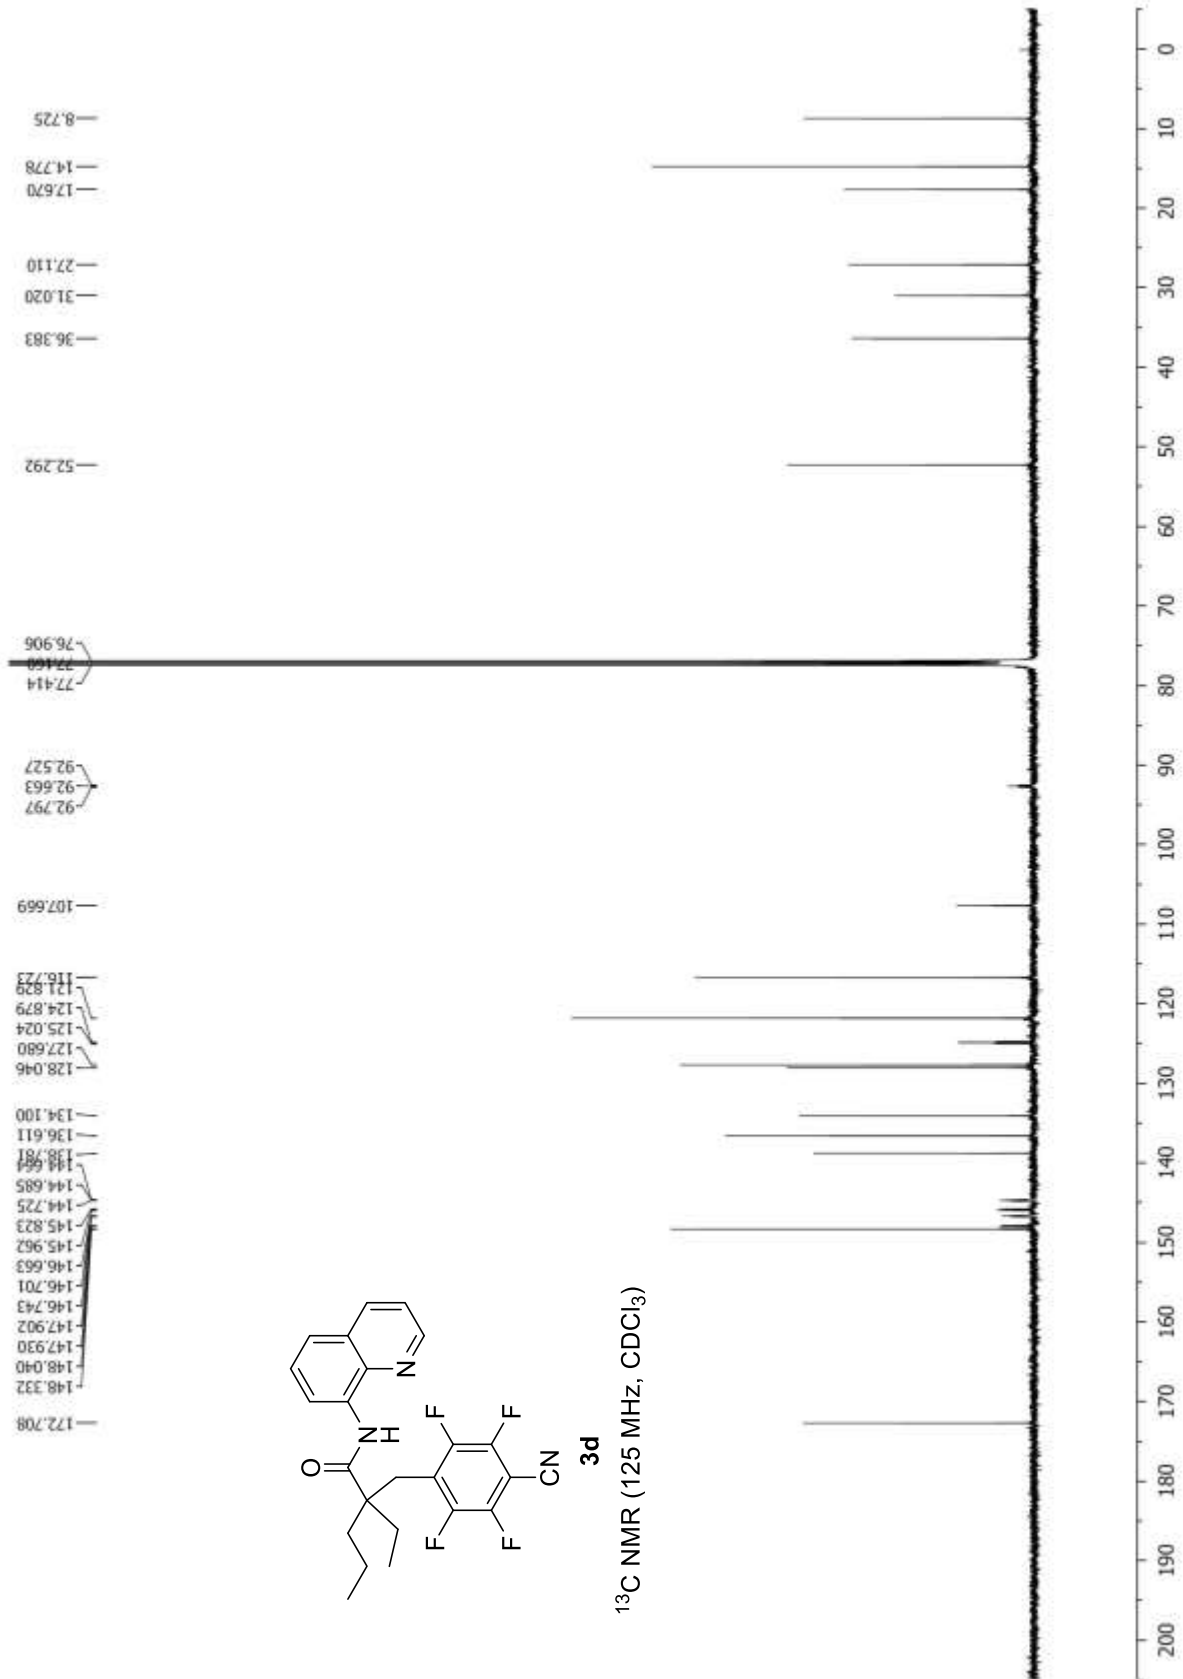

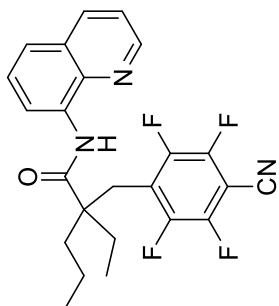

**3d**

<sup>19</sup>F NMR (471 MHz, CDCl<sub>3</sub>)

133.693  
133.708  
133.727  
133.747  
133.767  
133.782  
136.338  
136.353  
136.373  
136.392  
136.412  
136.427

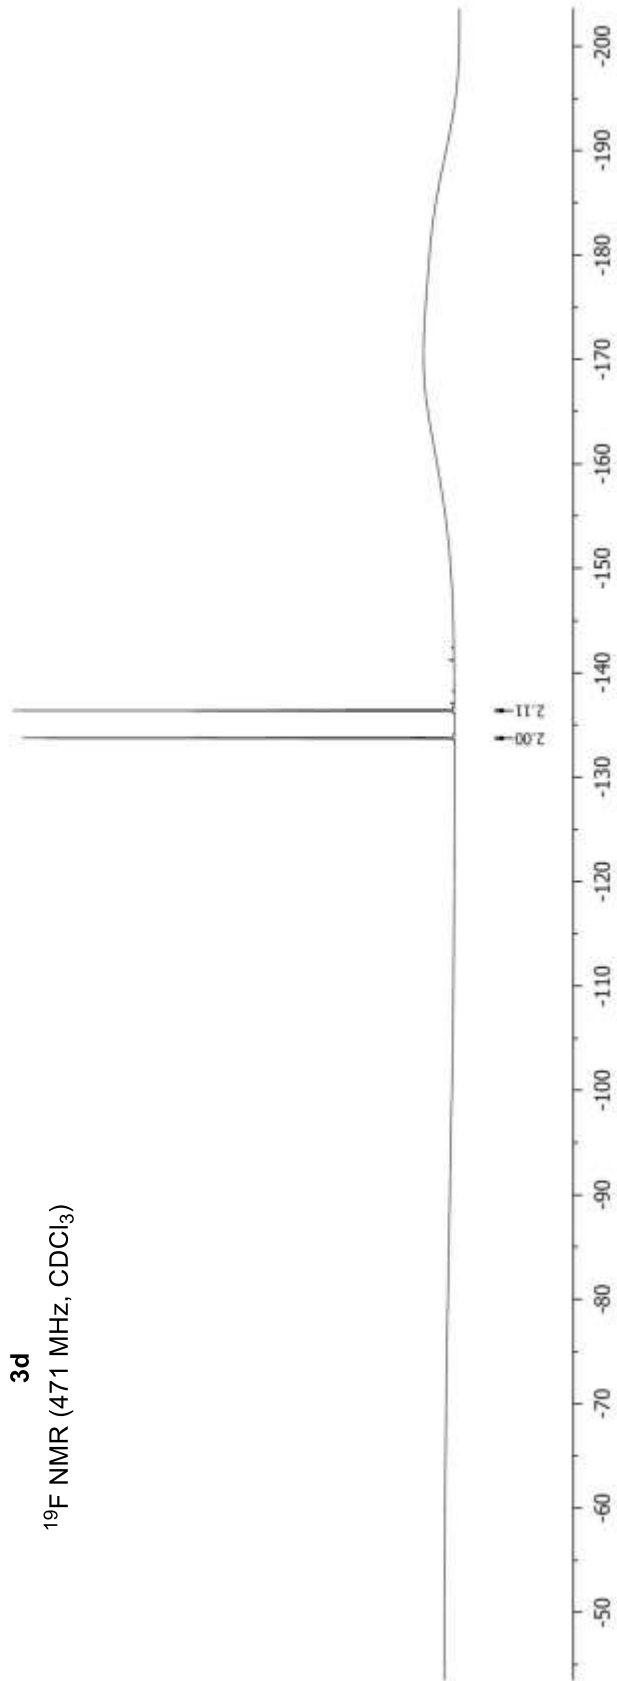

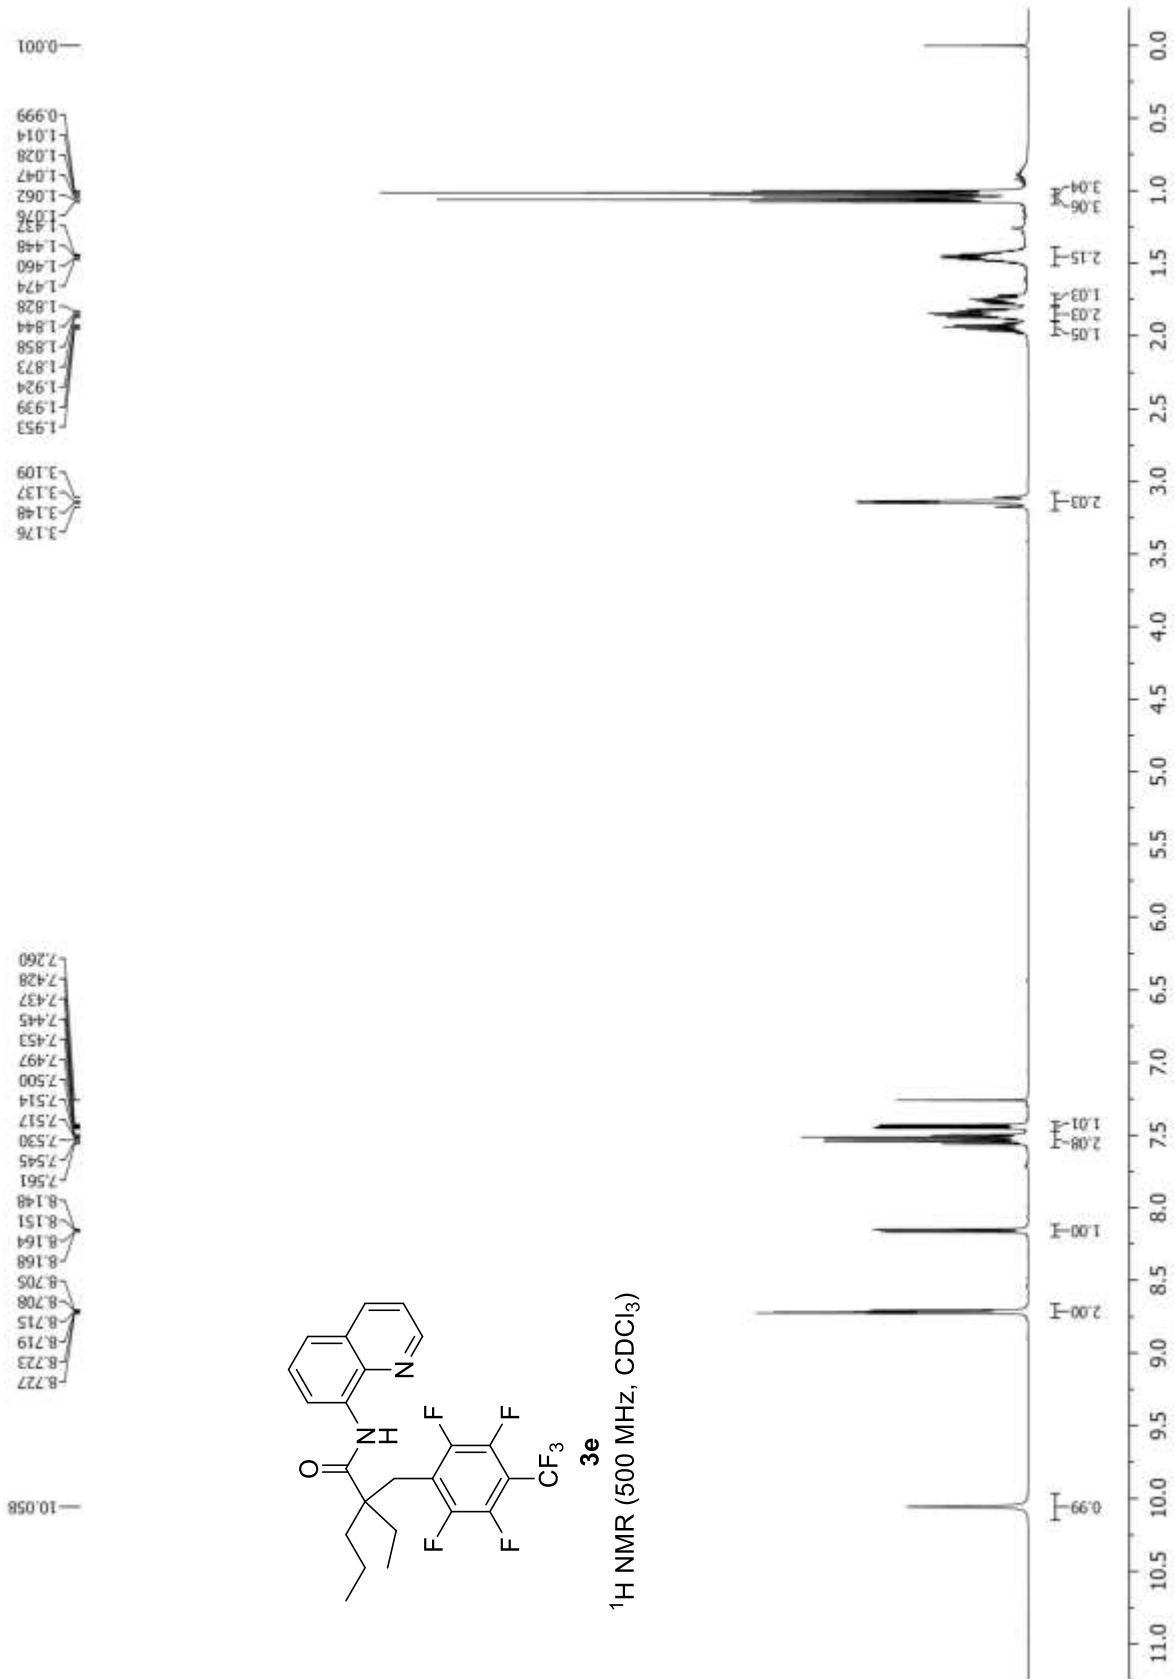

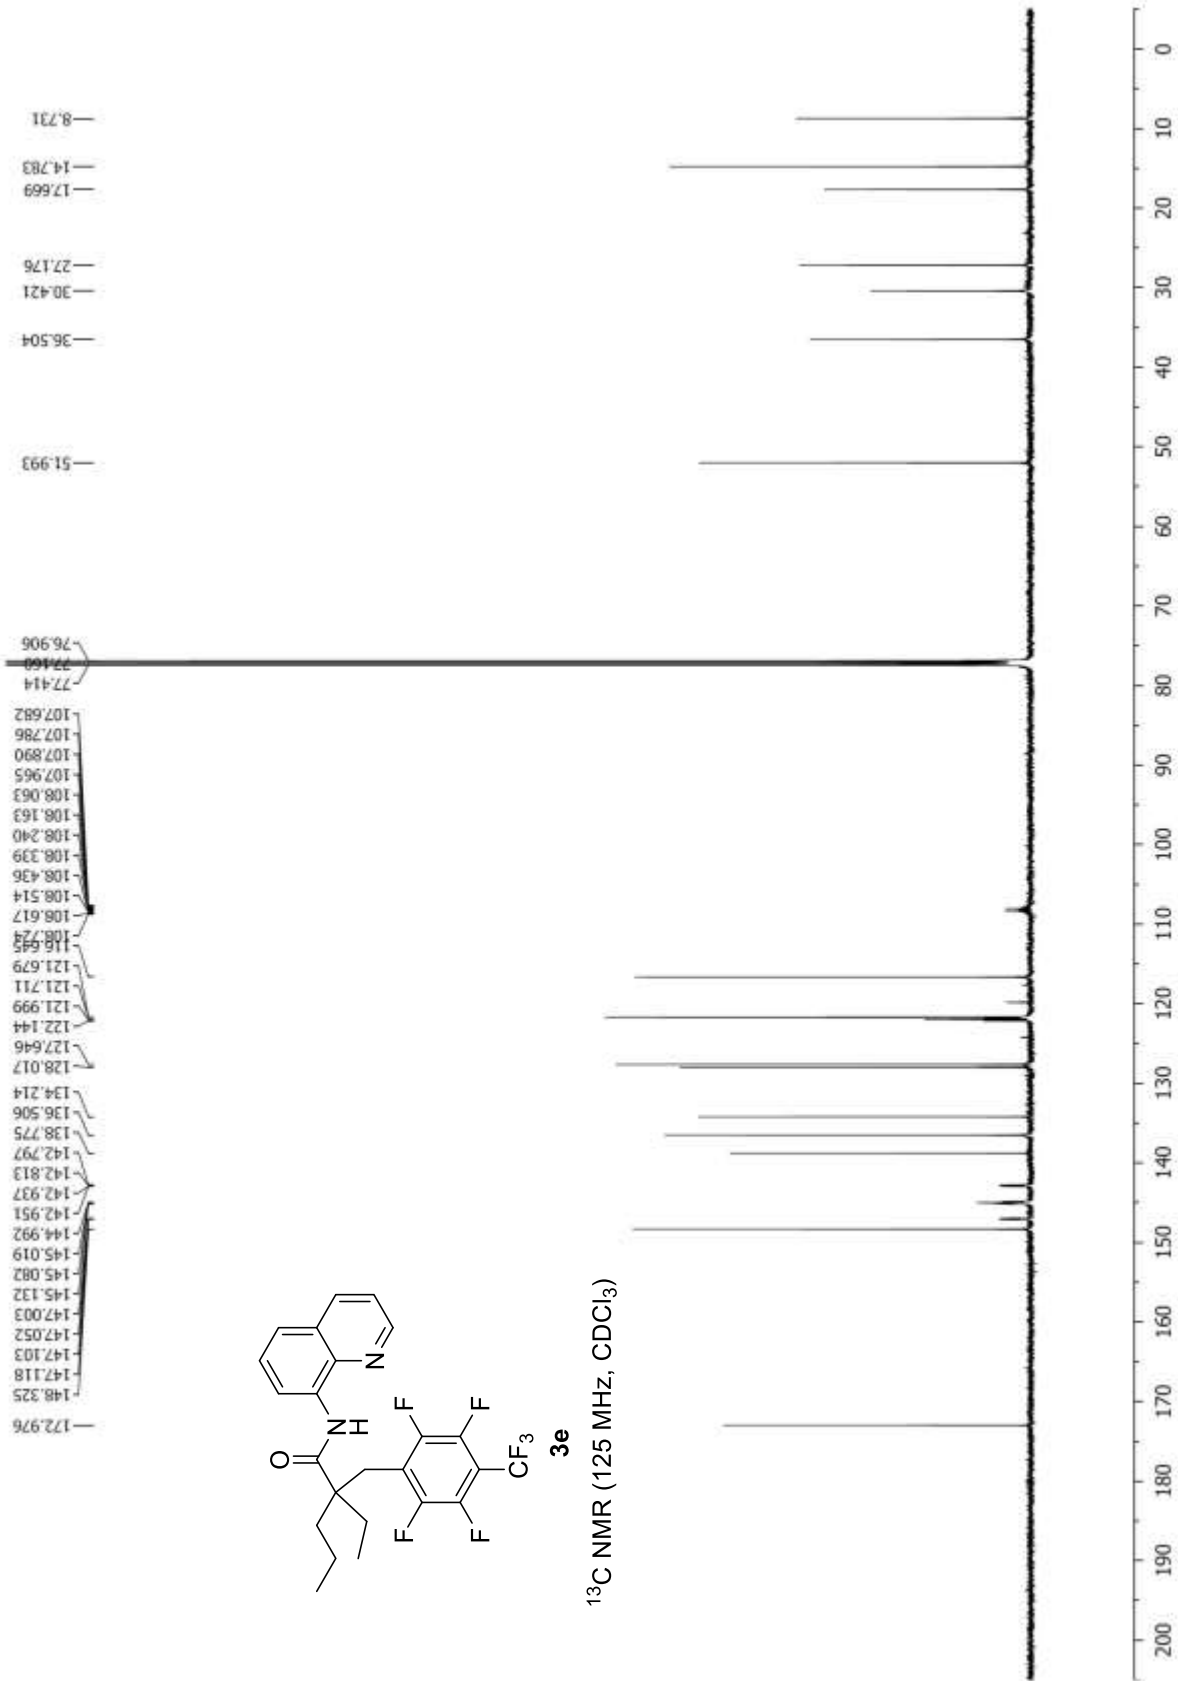

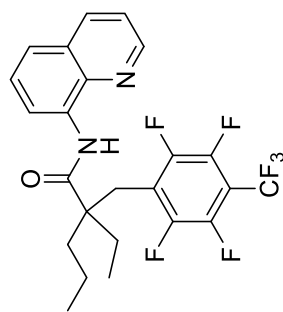

**3e**

<sup>19</sup>F NMR (471 MHz, CDCl<sub>3</sub>)

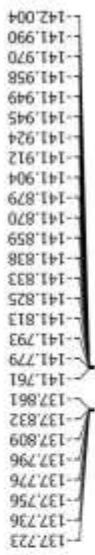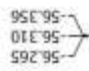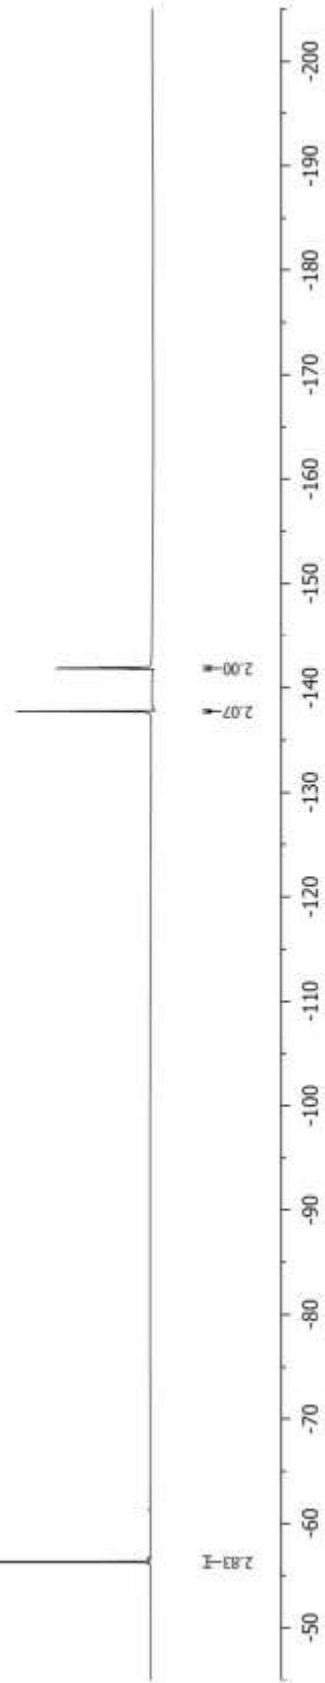



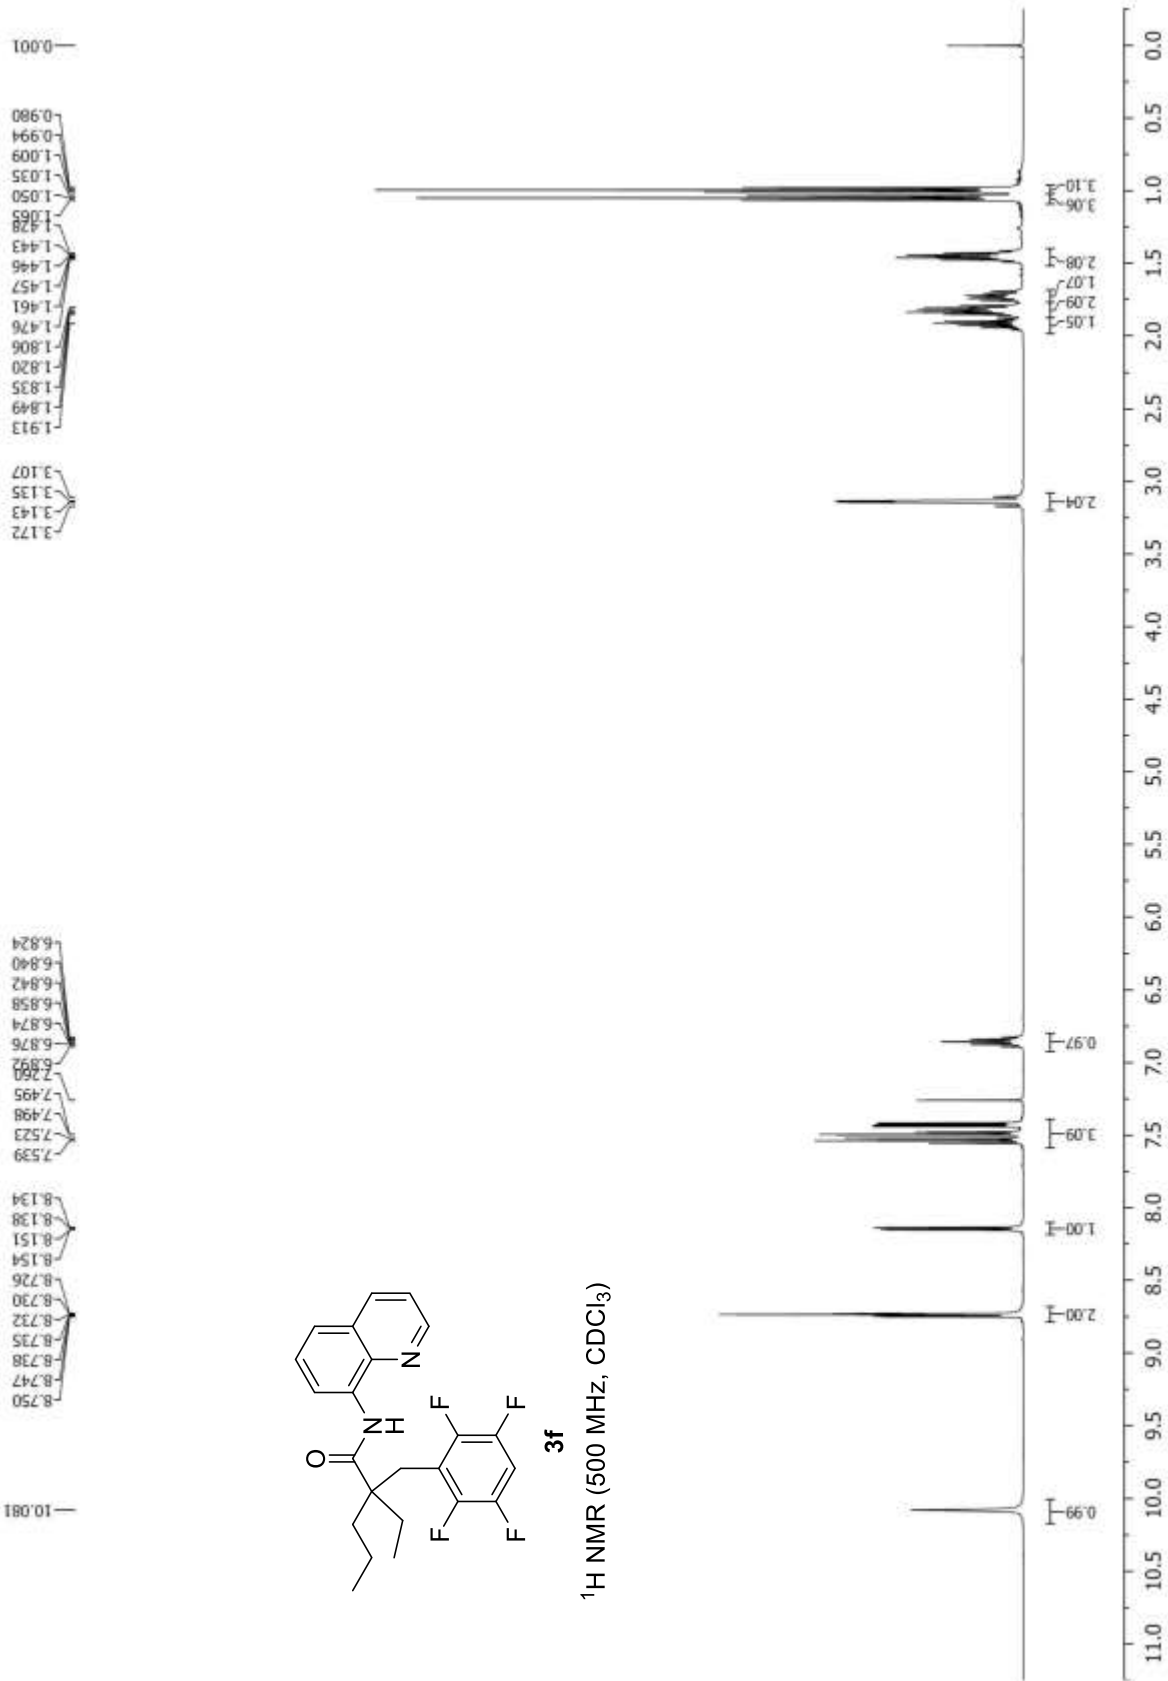

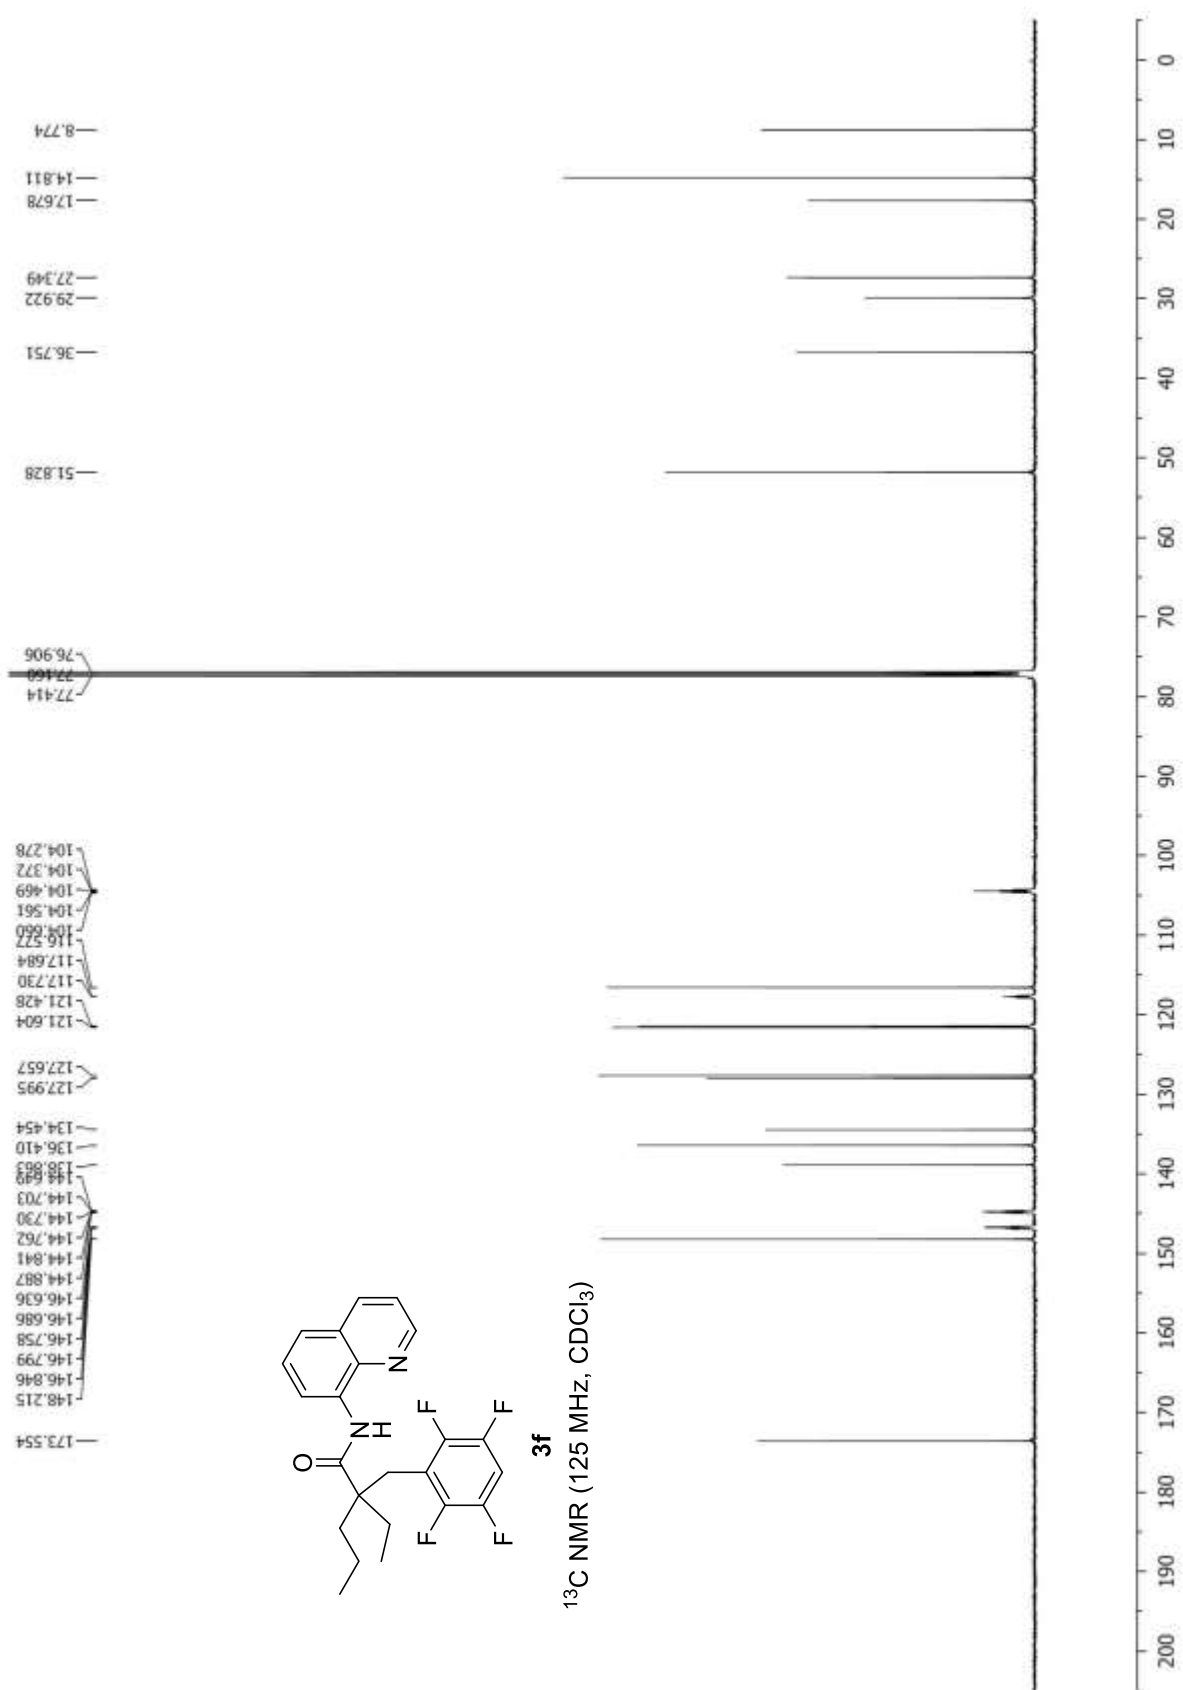

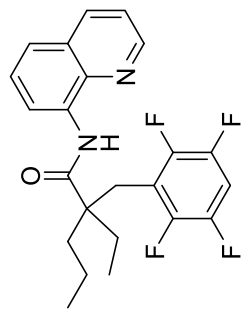

**3f**

$^{19}\text{F}$  NMR (471 MHz,  $\text{CDCl}_3$ )

-140.127  
-140.100  
-140.082  
-140.050

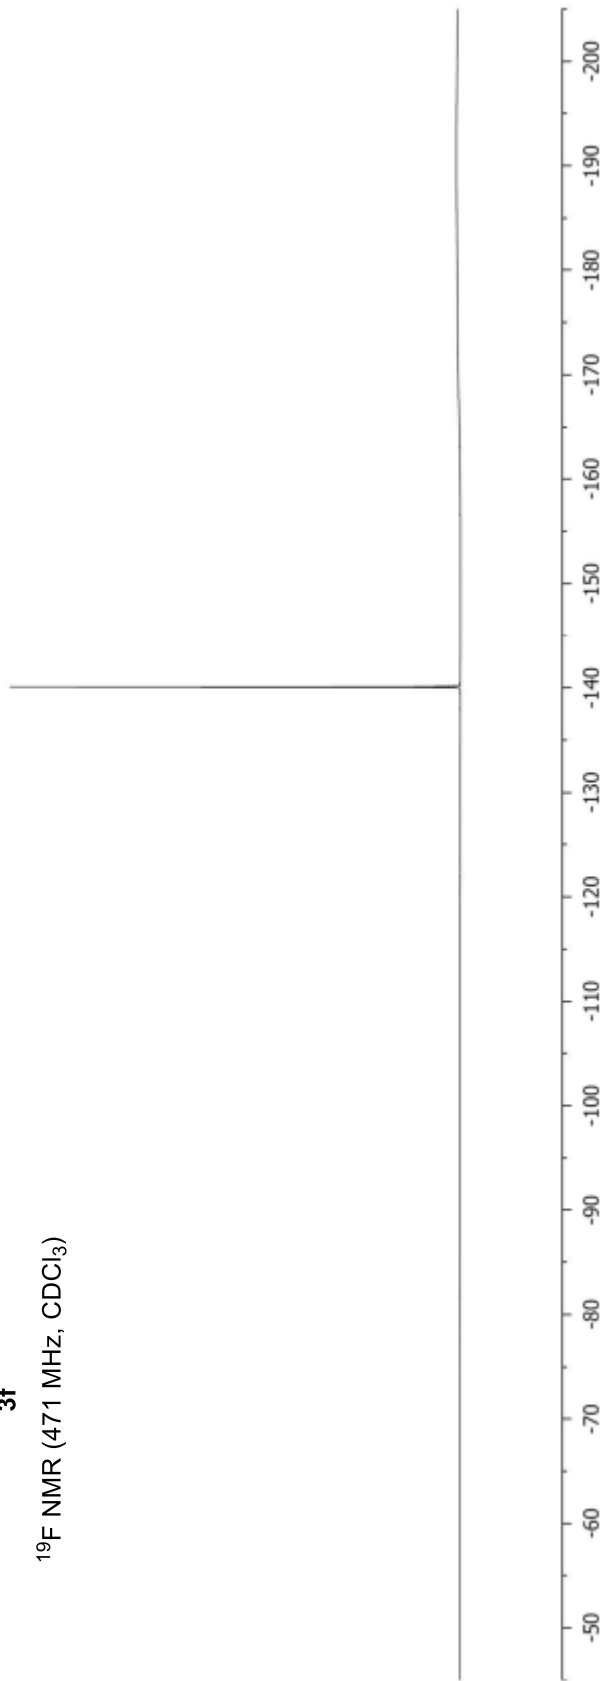

10.042  
8.748  
8.745  
8.732  
8.730  
8.729  
8.723  
8.720  
8.156  
8.152  
8.139  
8.136  
7.553  
7.537  
7.522  
7.498  
7.495  
7.482  
7.479  
7.473  
7.434  
7.426  
7.418  
7.260  
6.616  
6.611  
6.604  
6.597  
6.592  
6.584  
6.579  
6.572  
6.565  
3.075  
3.047  
3.043  
3.039  
3.010  
1.950  
1.935  
1.928  
1.920  
1.906  
1.891  
1.877  
1.847  
1.832  
1.825  
1.818  
1.803  
1.788  
1.785  
1.774  
1.737  
1.722  
1.718  
1.706  
1.703  
1.697  
1.686  
1.675  
1.480  
1.477  
1.465  
1.462  
1.454  
1.447  
1.439  
1.432  
1.428  
1.426  
1.418  
1.414  
1.399  
1.053  
1.039  
1.024  
1.008  
0.993  
0.979  
0.002

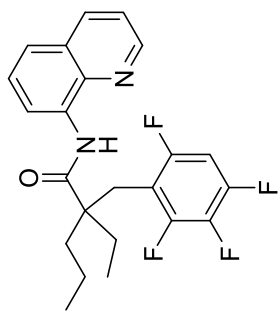

<sup>1</sup>H NMR (500 MHz, CDCl<sub>3</sub>)

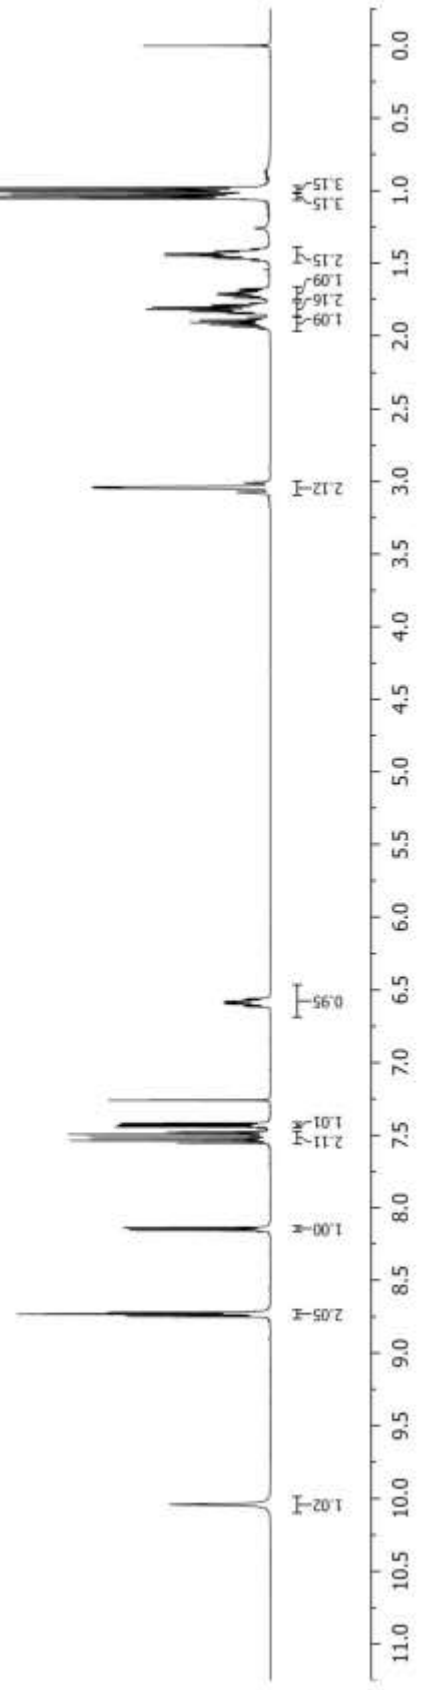

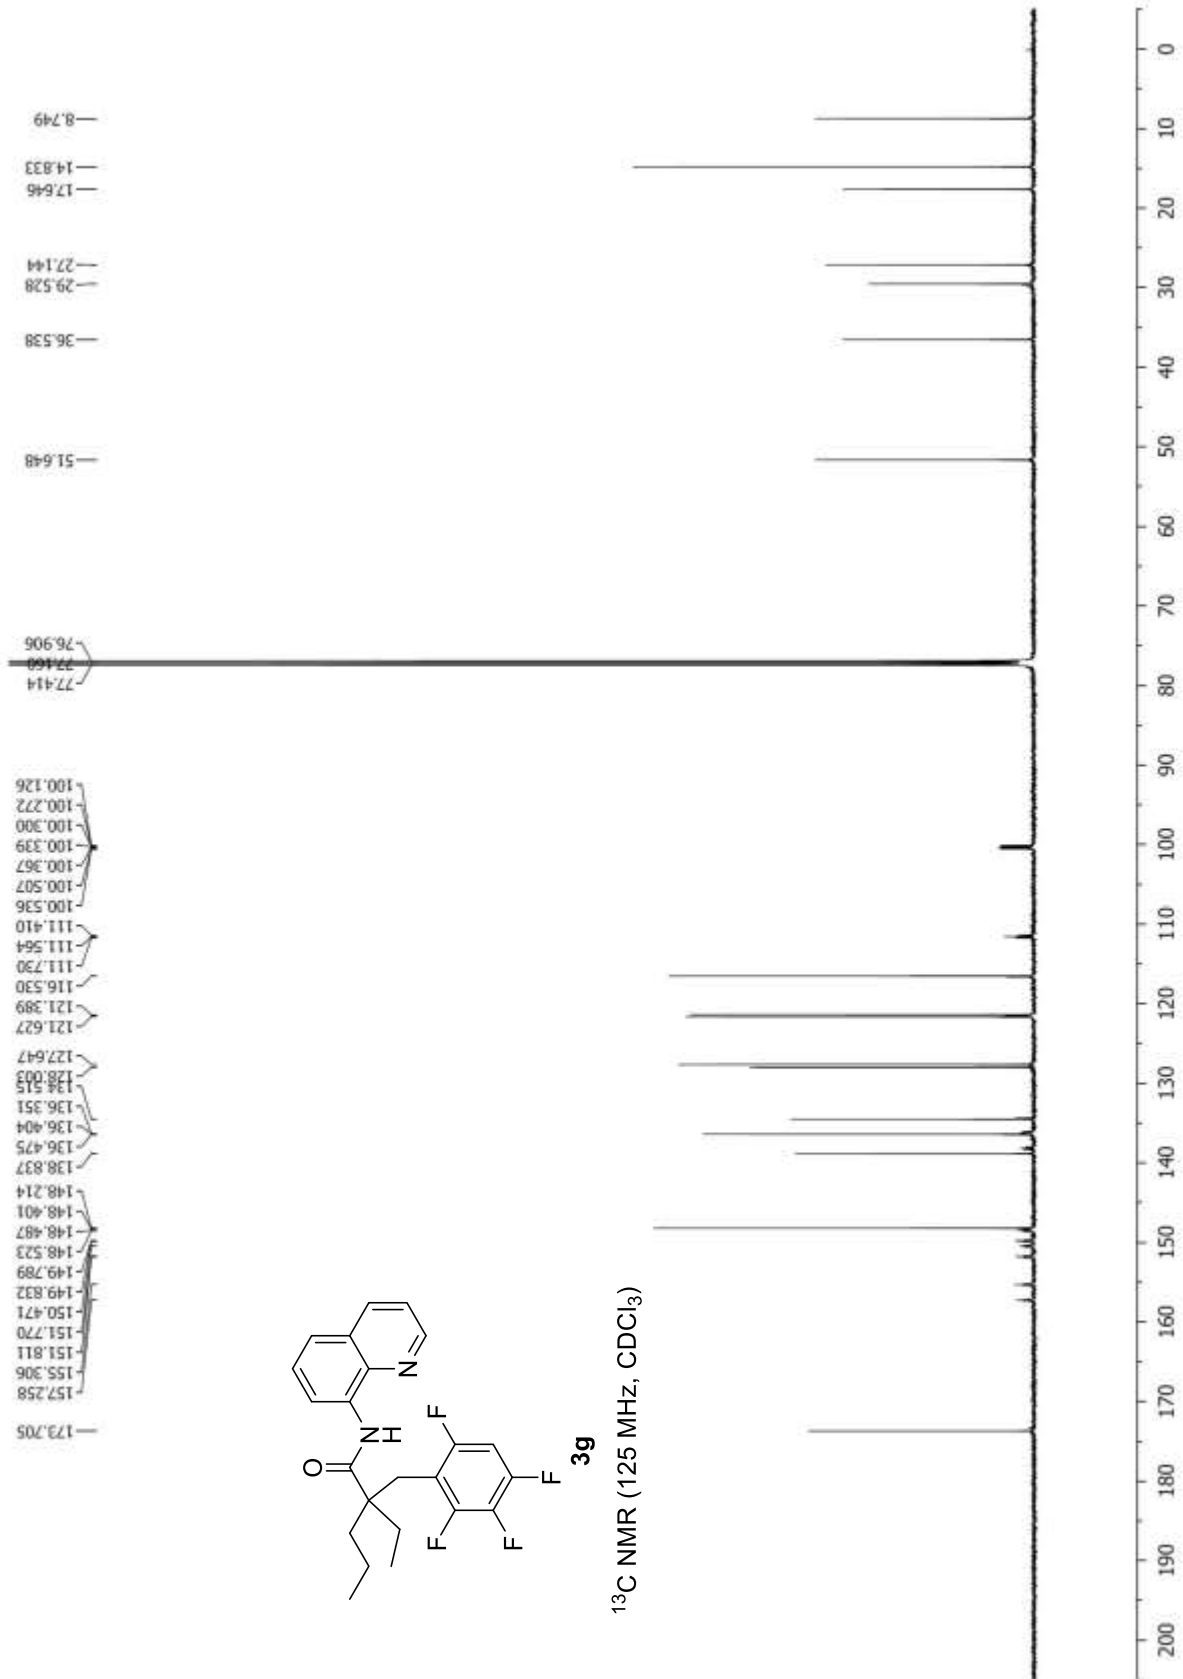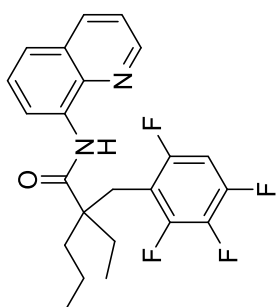

**3g**

<sup>13</sup>C NMR (125 MHz, CDCl<sub>3</sub>)

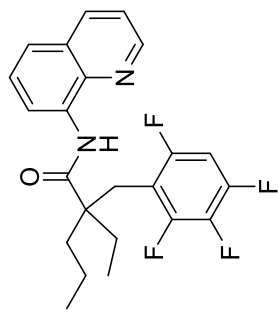

**3g**

$^{19}\text{F}$  NMR (471 MHz,  $\text{CDCl}_3$ )

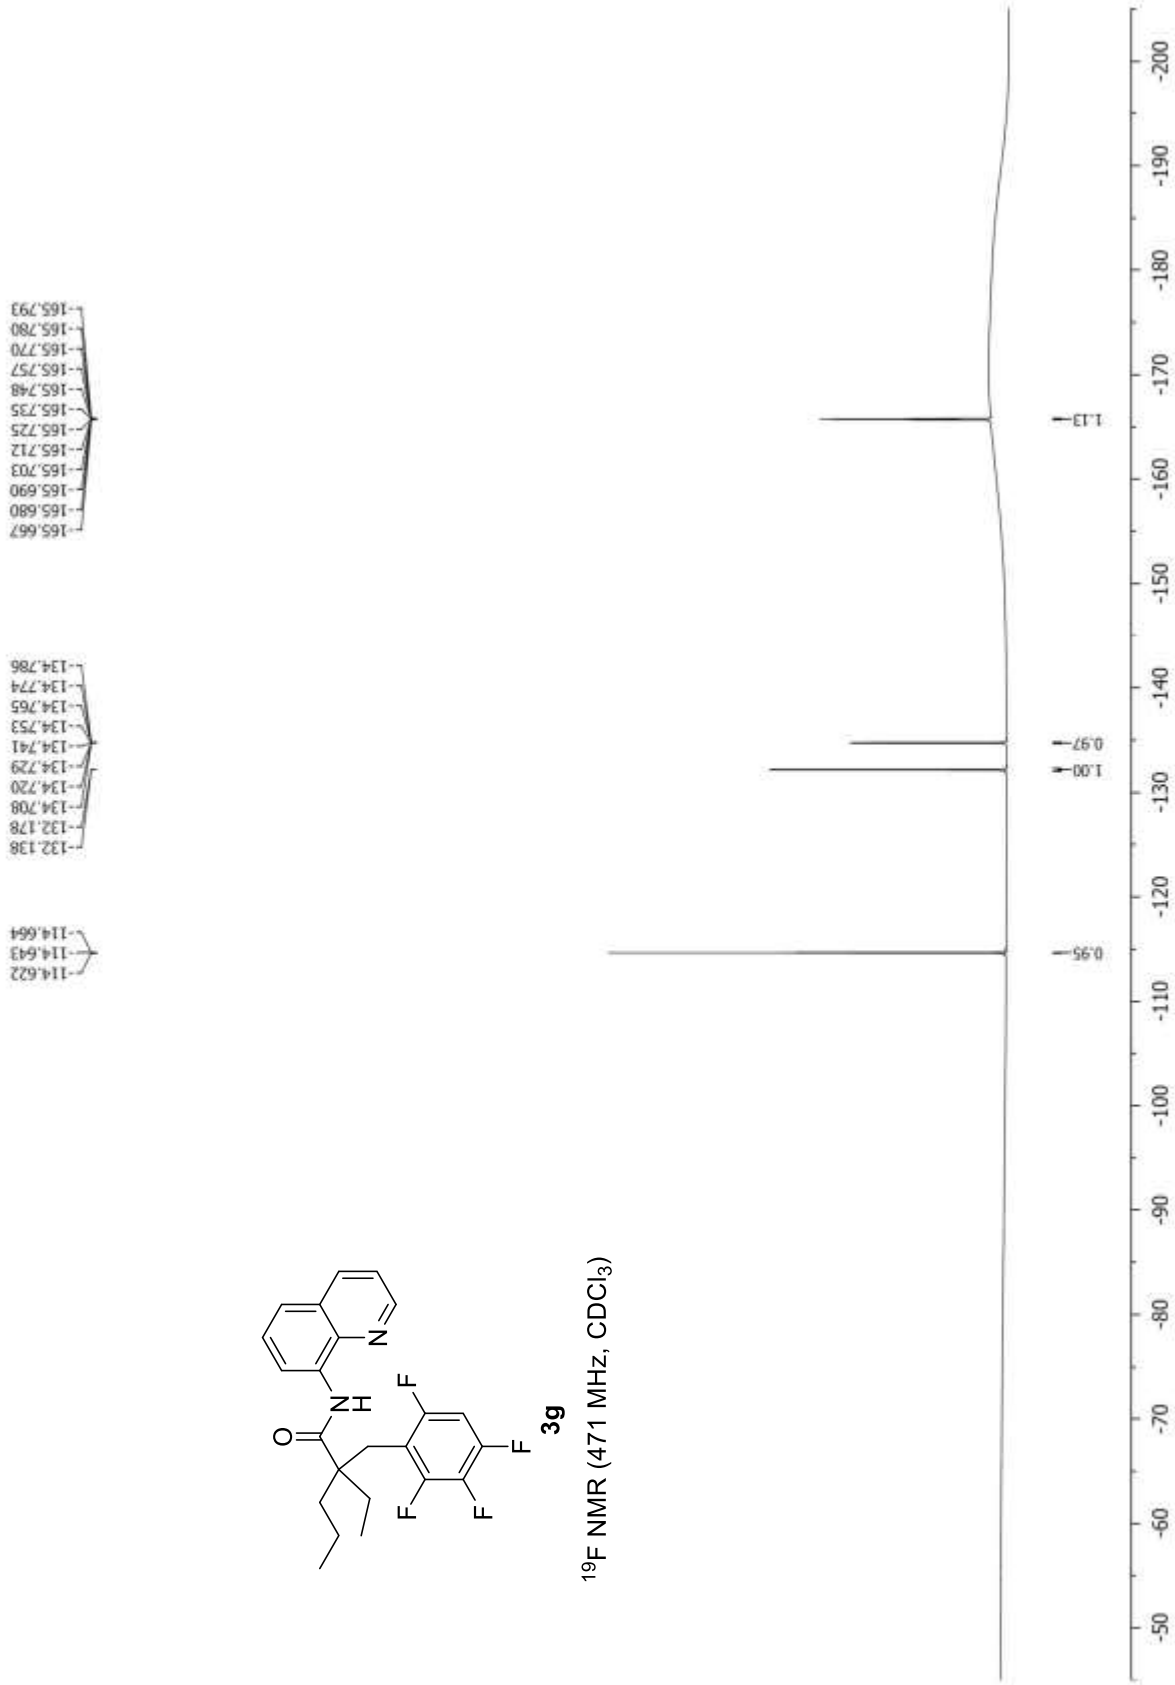

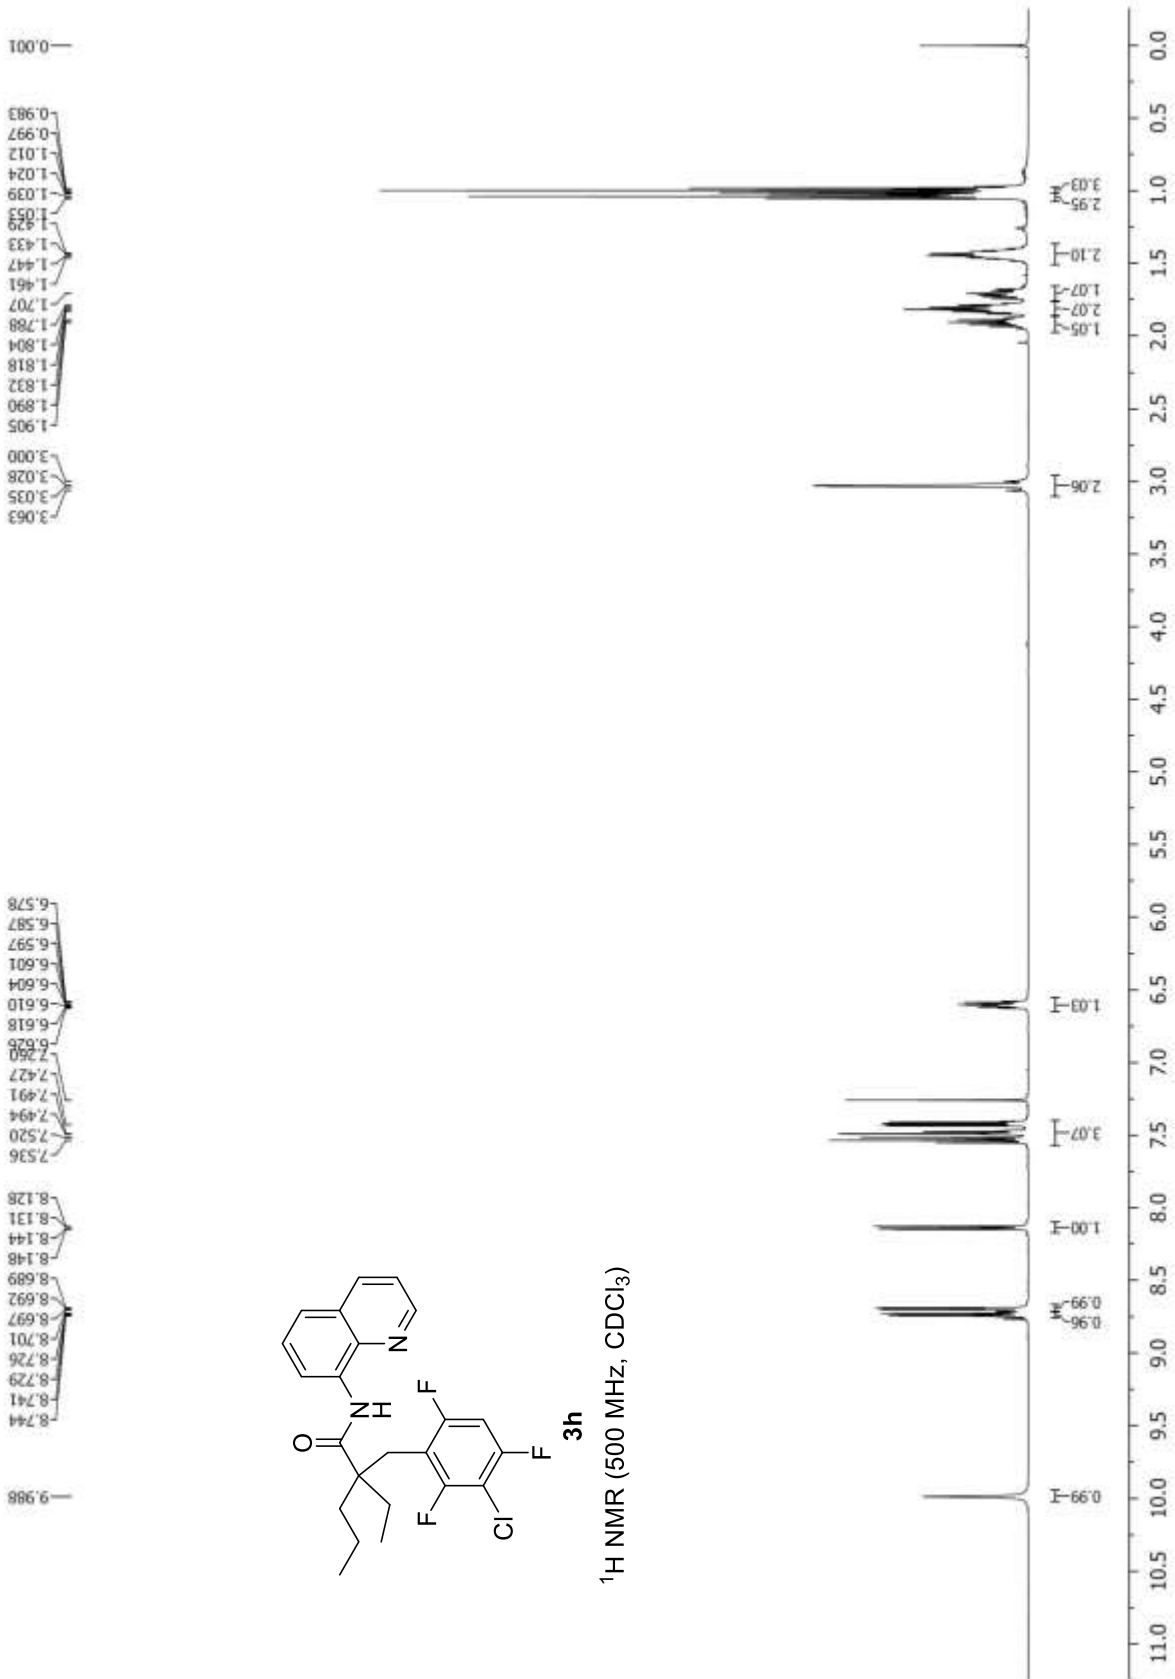

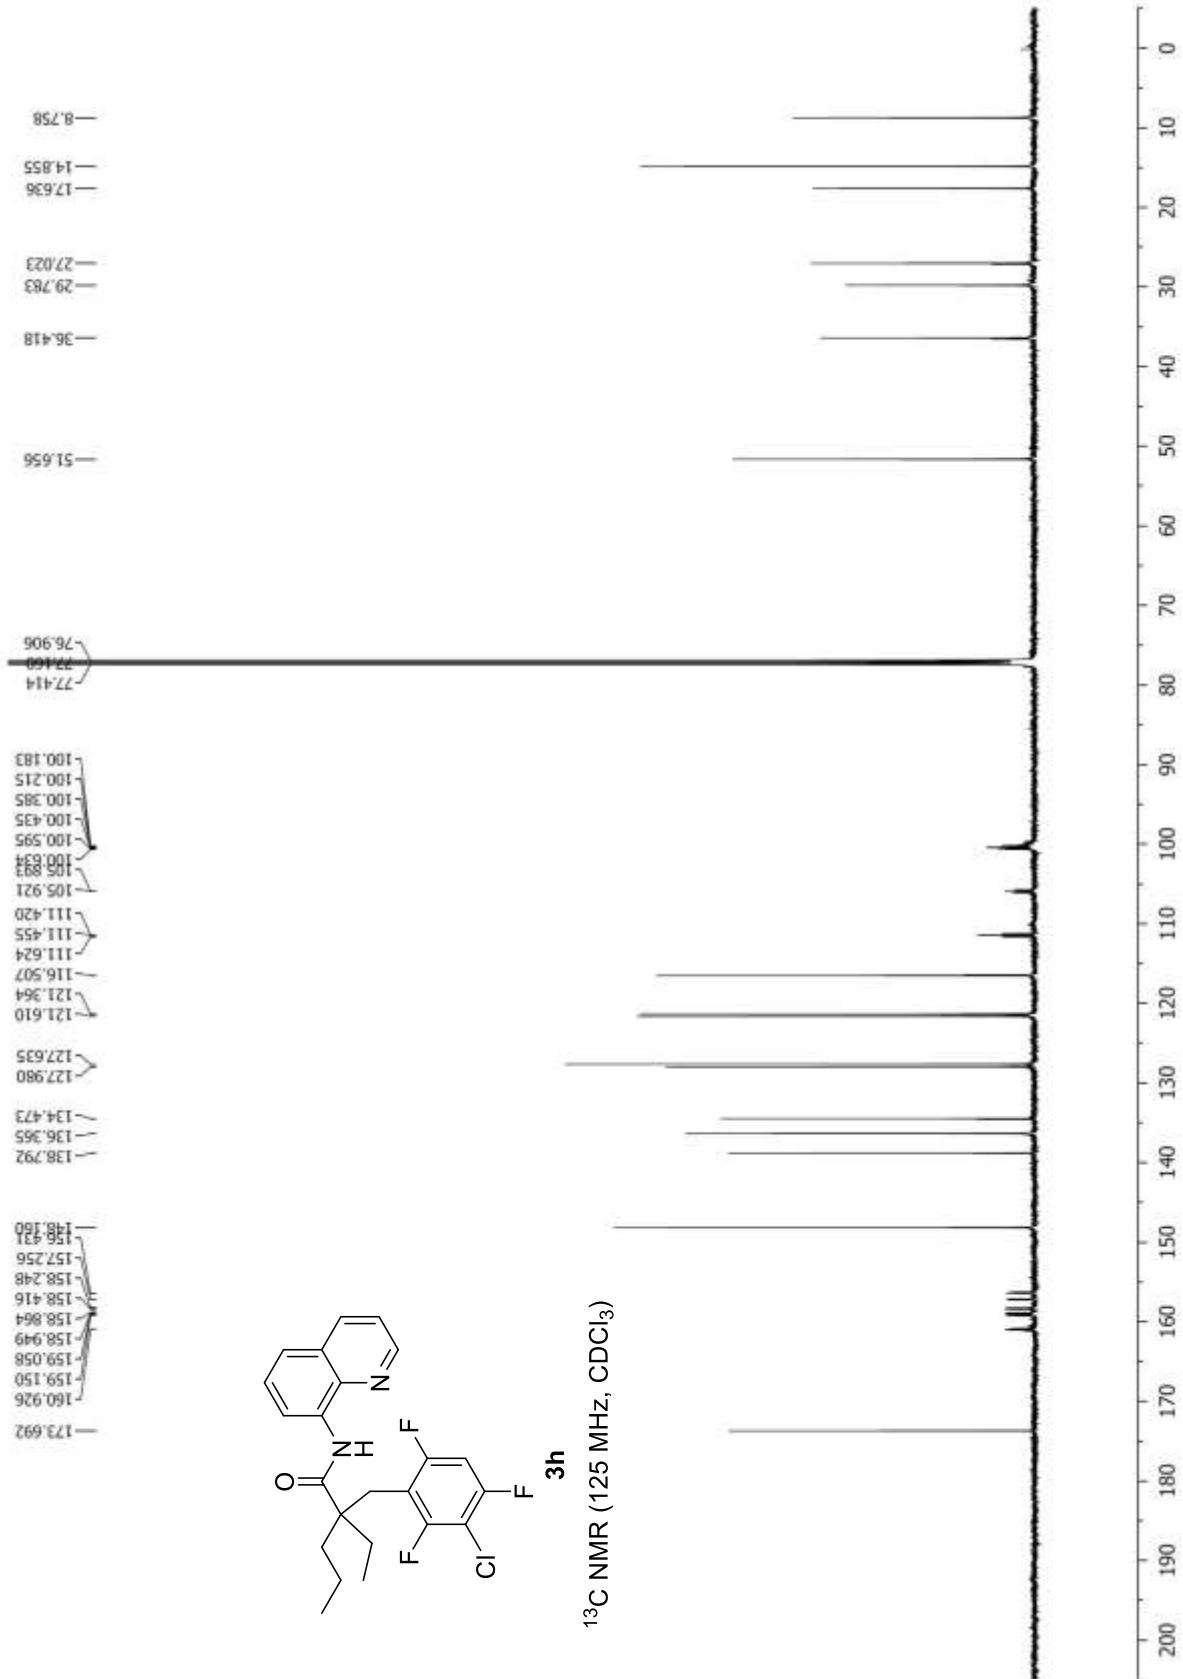



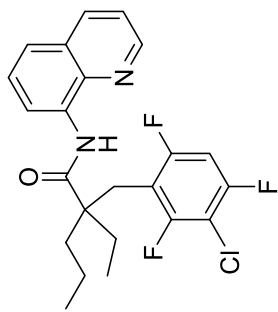

**3h**

$^{19}\text{F}$  NMR (471 MHz,  $\text{CDCl}_3$ )

113.144  
113.139  
113.134  
113.127  
113.118  
113.110  
109.962  
109.949

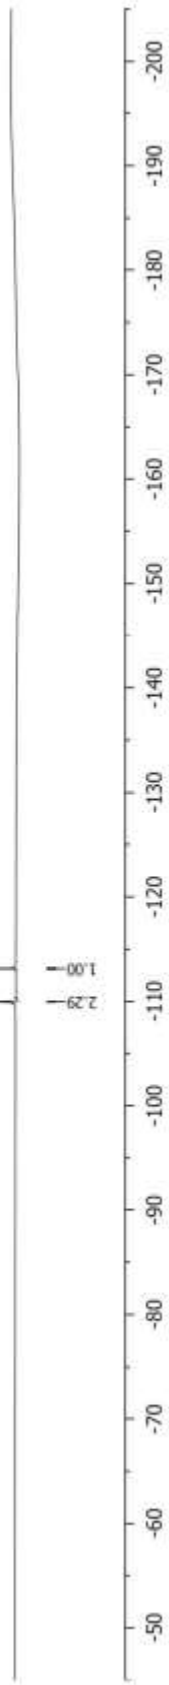

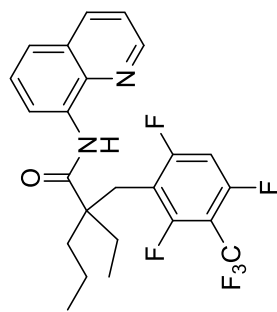

**3i**  
<sup>1</sup>H NMR (500 MHz, CDCl<sub>3</sub>)

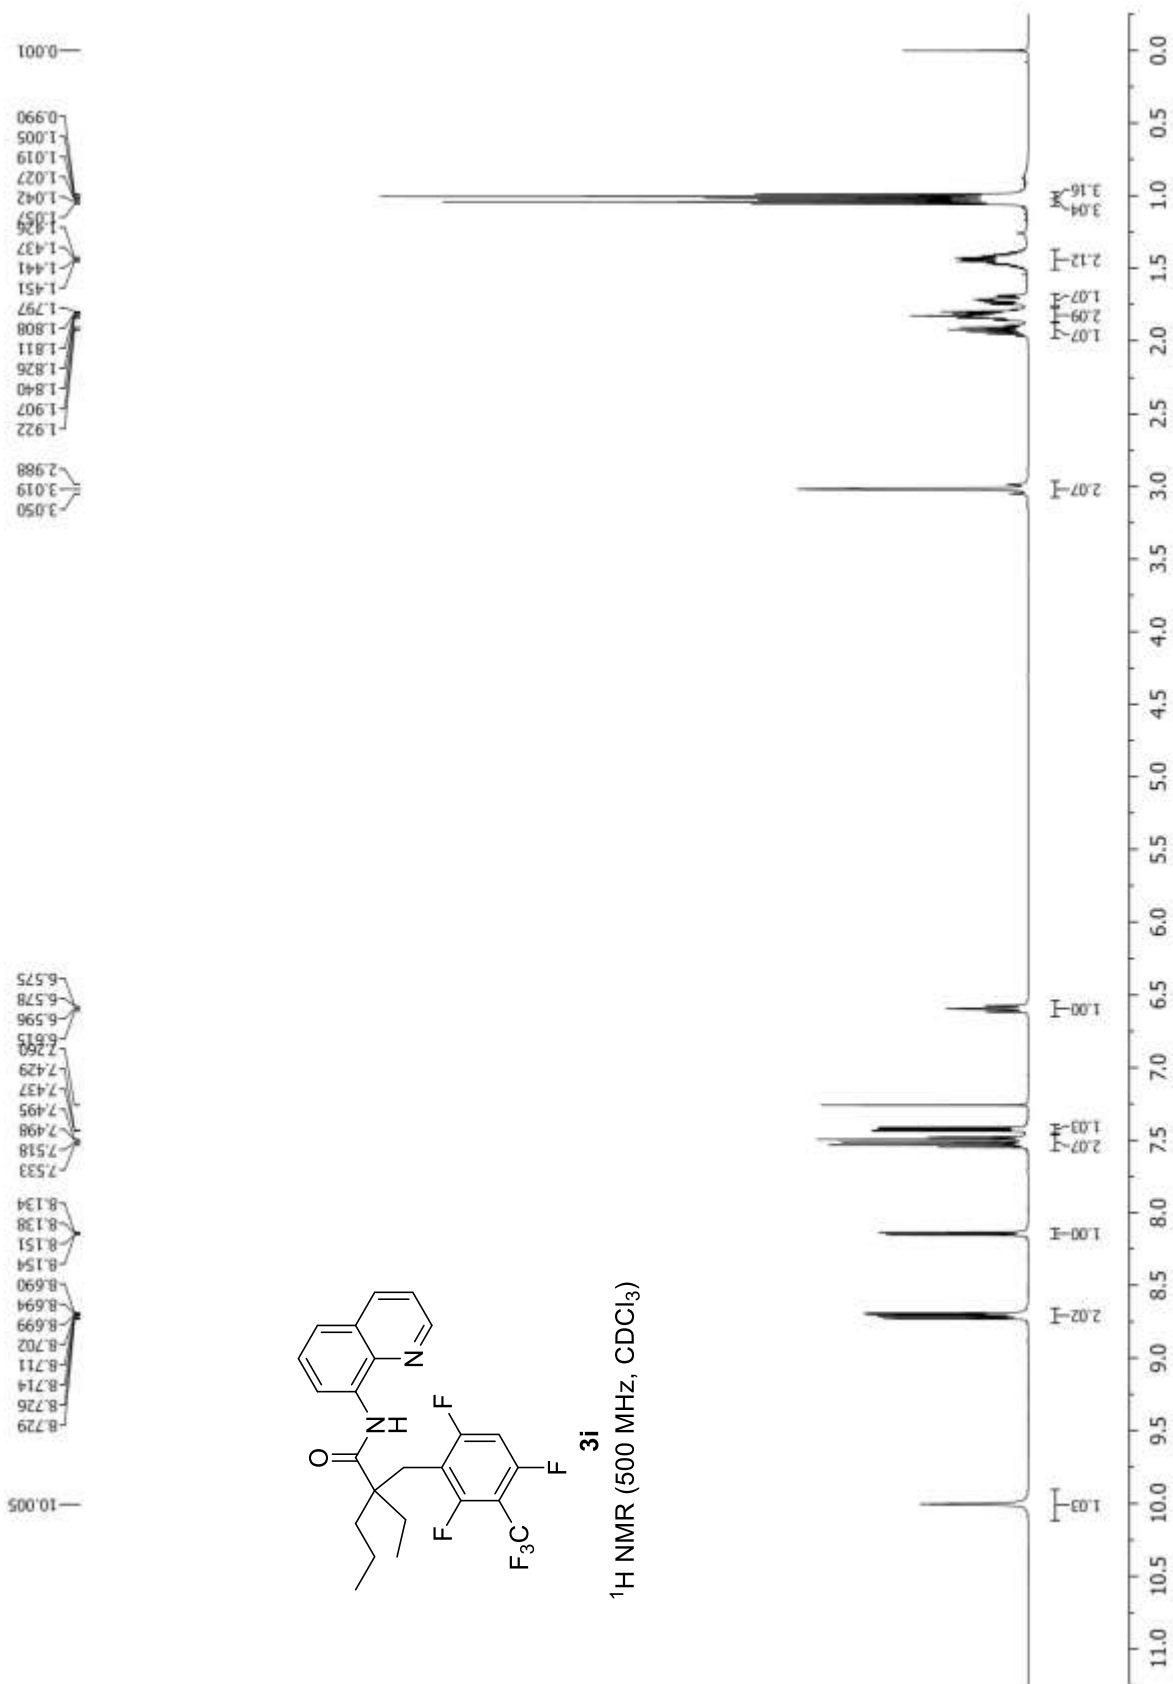

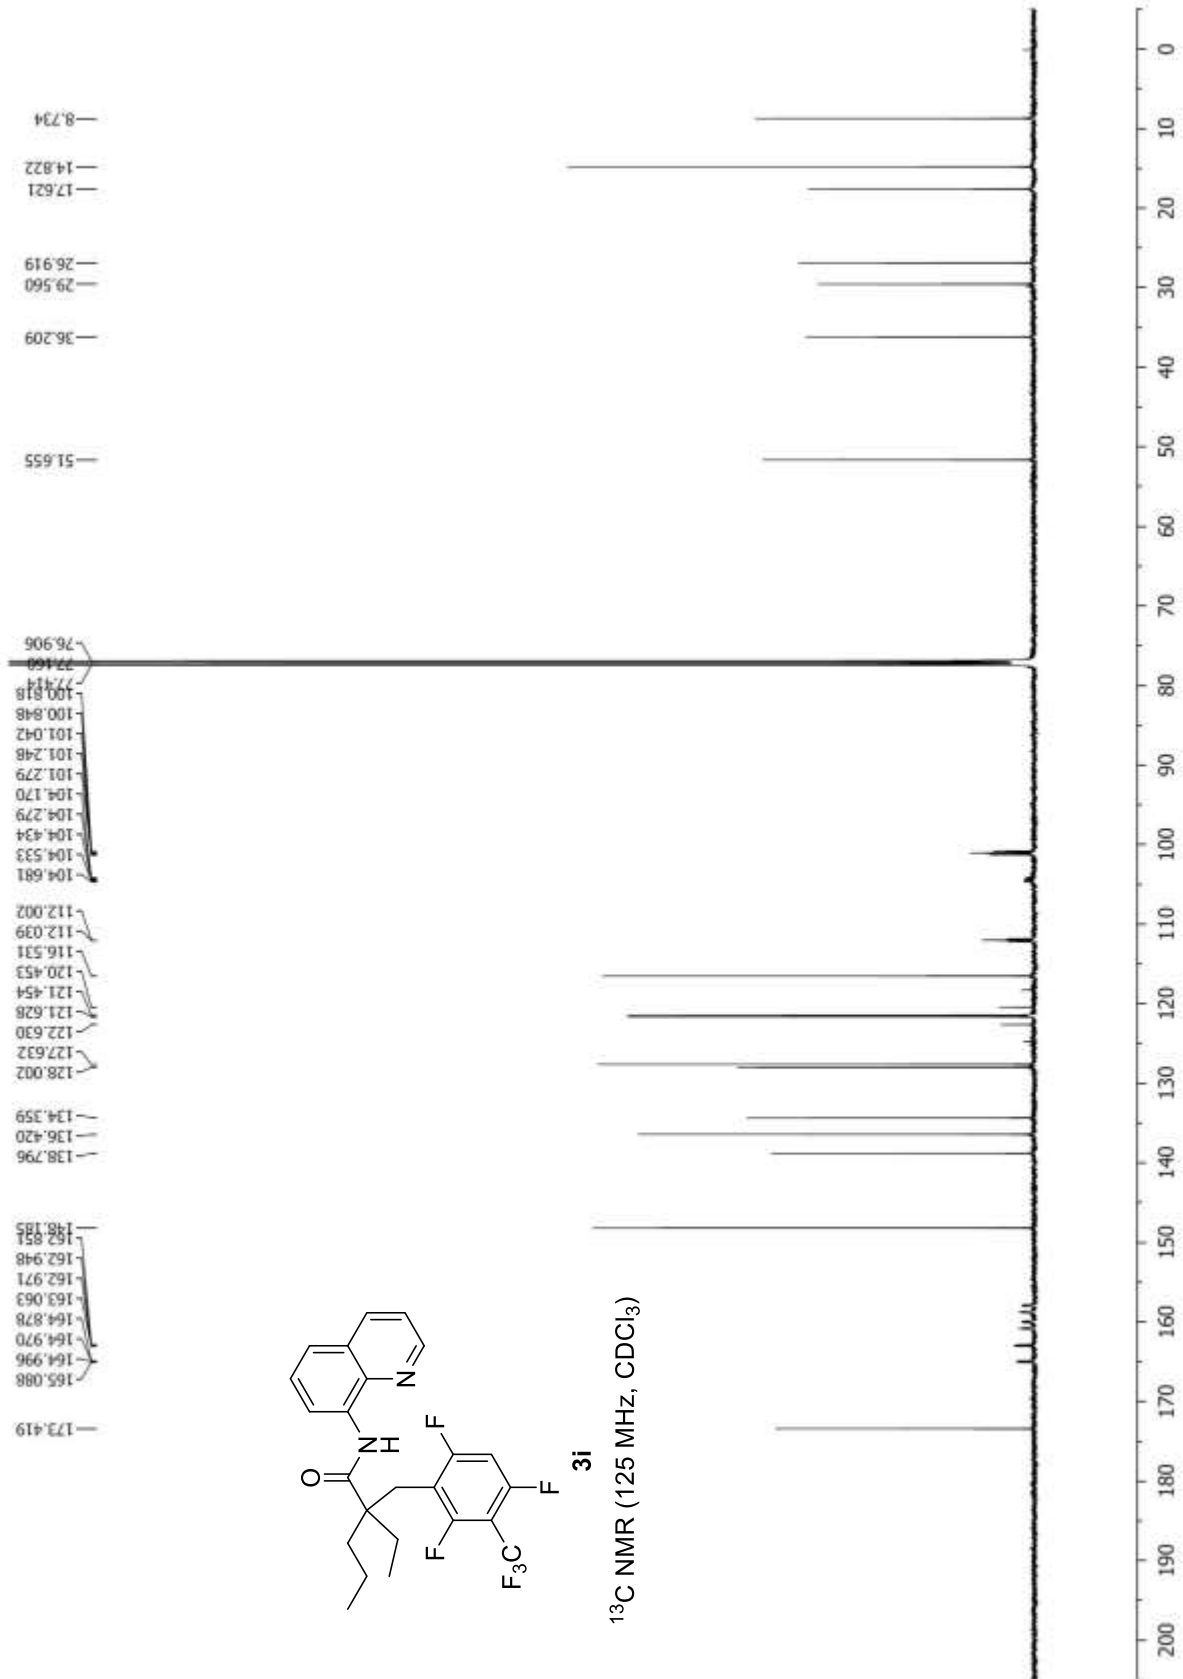

110.270  
110.249  
110.227  
110.220  
110.699  
110.677  
110.671  
110.649  
110.628  
110.600  
110.578  
108.030  
108.011  
107.982  
107.964  
107.935  
107.917  
107.888  
107.870  
101.298  
101.279  
101.259  
101.240

56.515  
56.467  
56.419

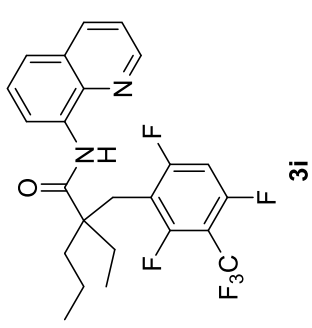

<sup>19</sup>F NMR (471 MHz, CDCl<sub>3</sub>)

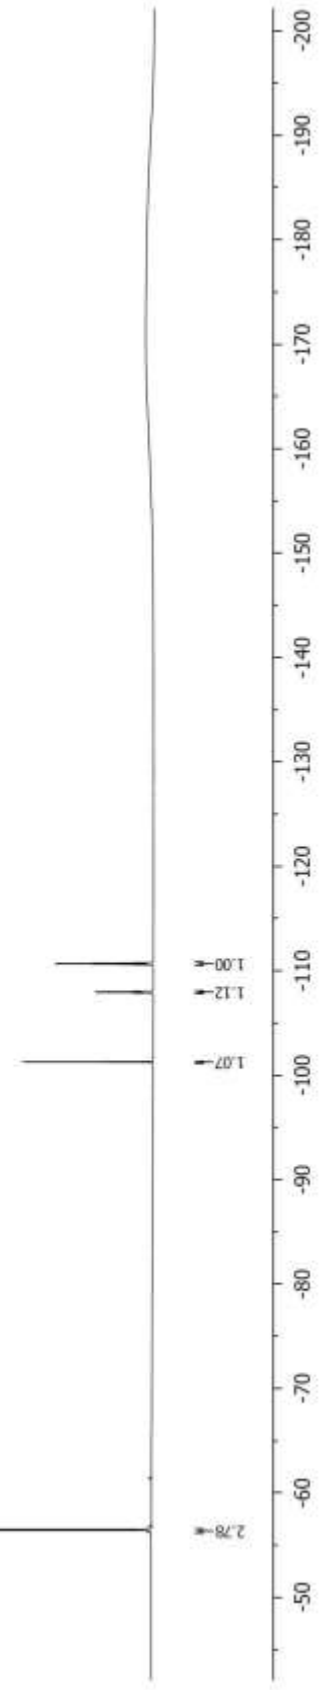

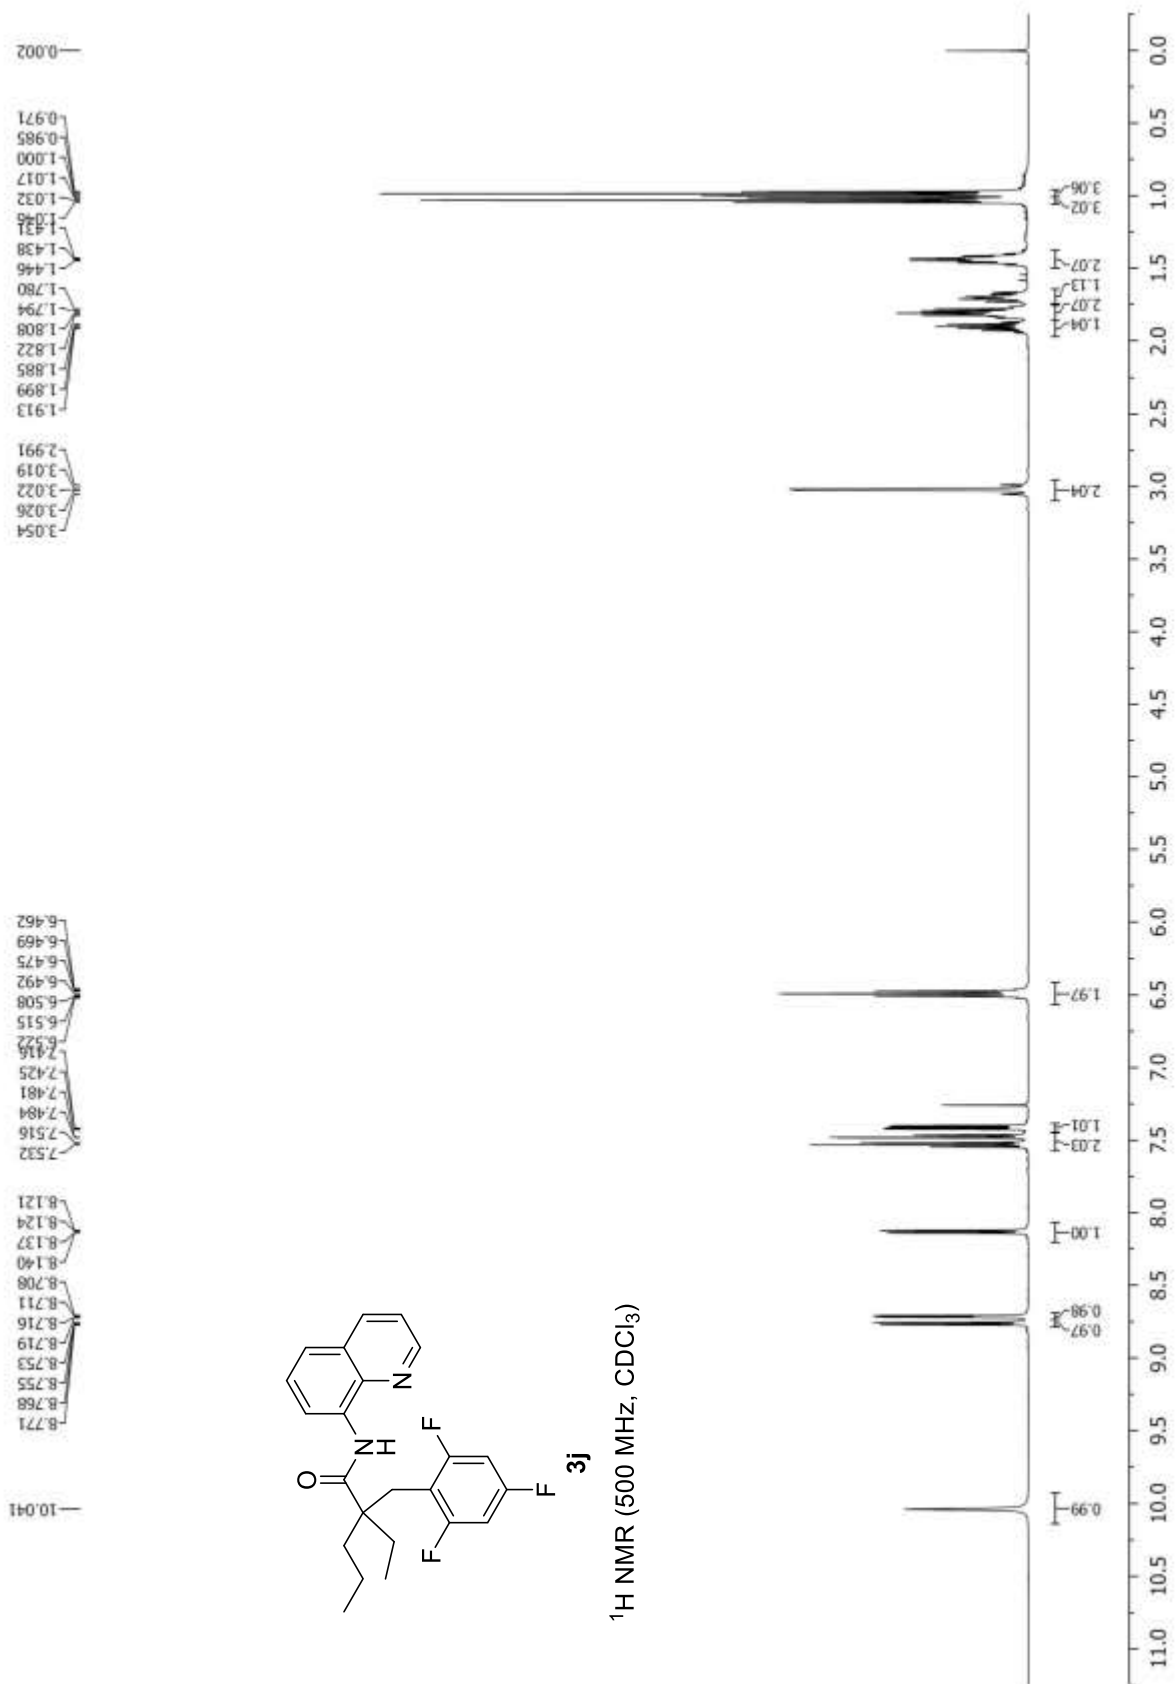

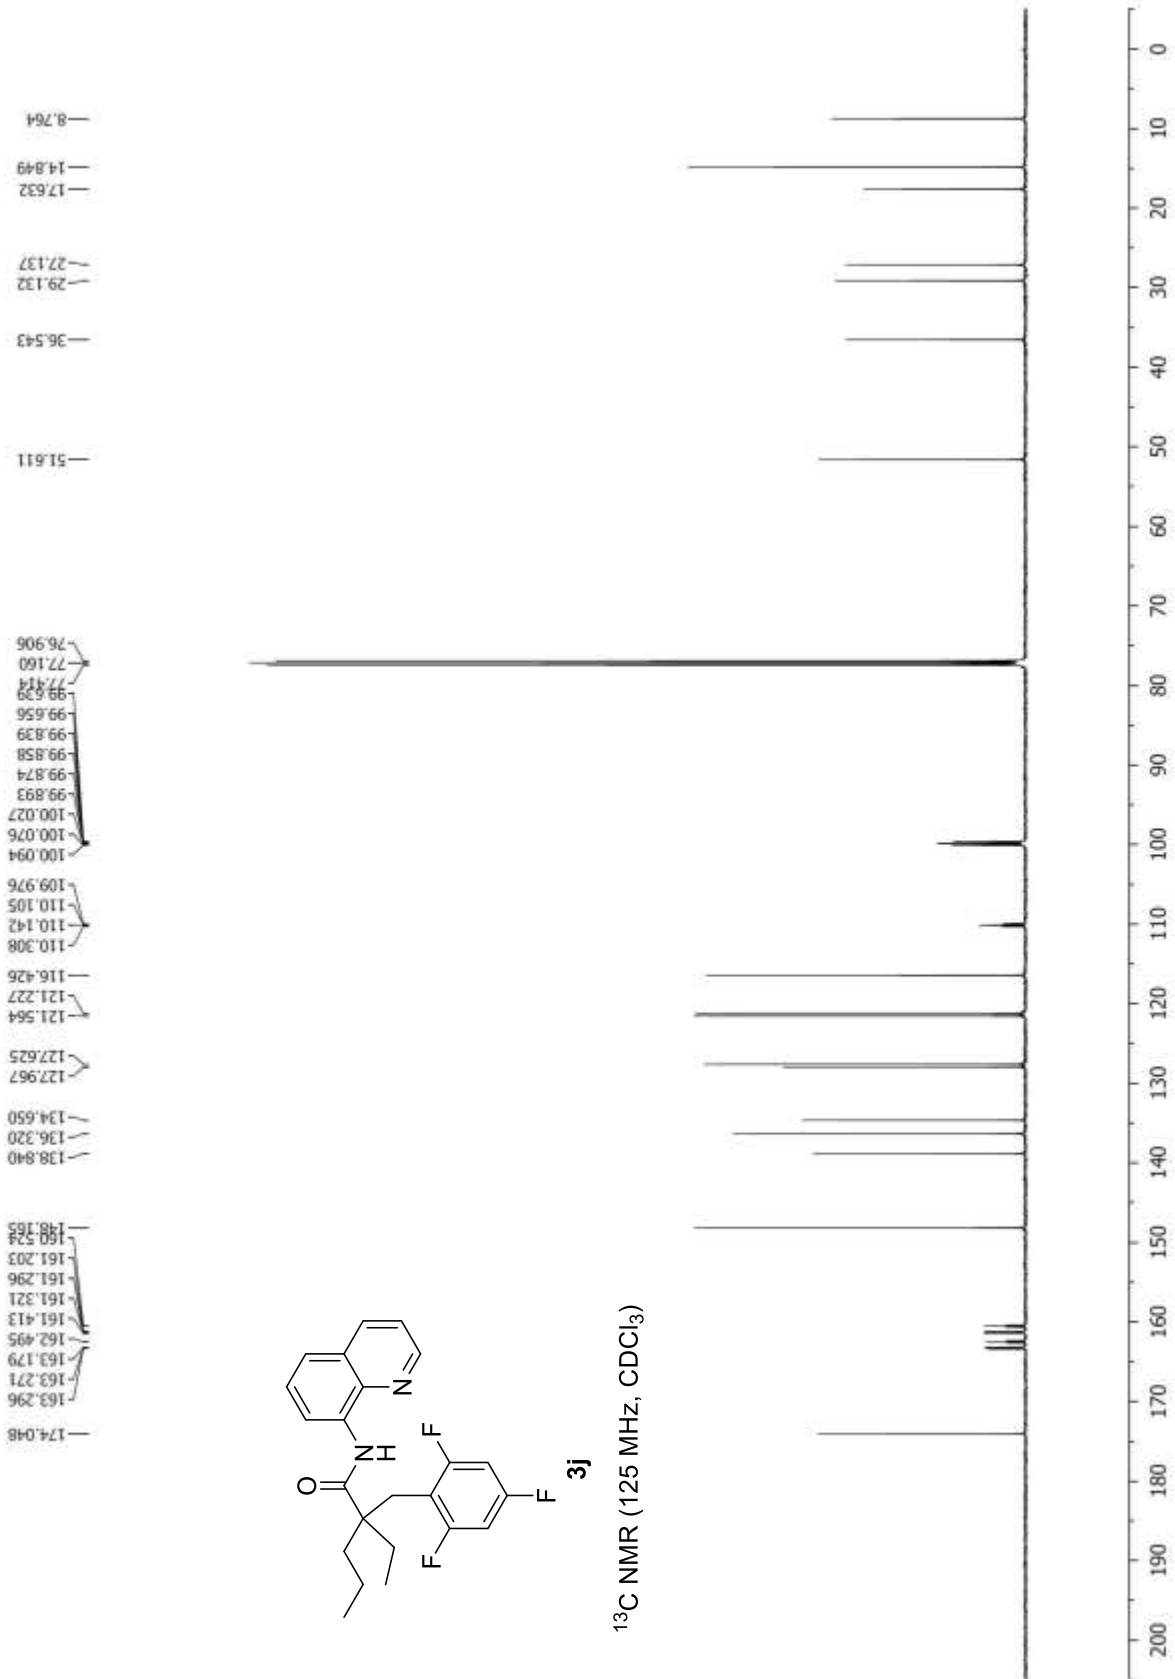

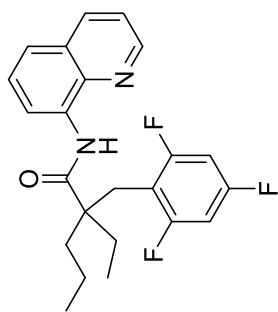

<sup>19</sup>F NMR (471 MHz, CDCl<sub>3</sub>)

110.655  
110.651  
110.637  
110.624  
110.619  
108.180  
108.166  
108.151

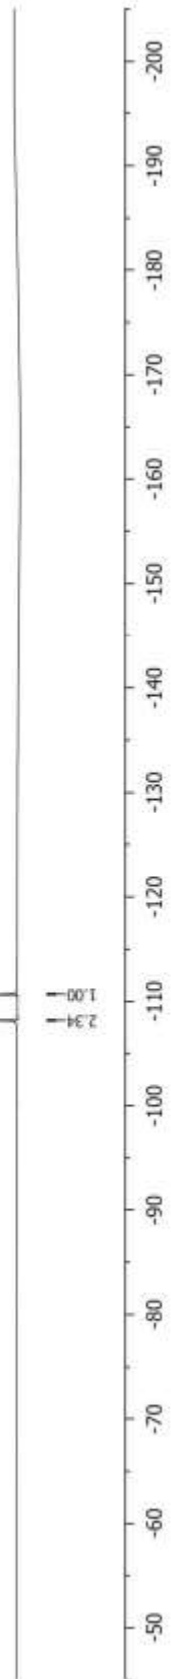

10.067  
8.771  
8.769  
8.756  
8.753  
8.723  
8.720  
8.714  
8.711  
8.711  
8.141  
8.138  
8.125  
8.122  
7.550  
7.534  
7.519  
7.486  
7.483  
7.469  
7.467  
7.425  
7.417  
7.409  
7.400  
7.260  
6.927  
6.918  
6.908  
6.900  
6.890  
6.882  
6.872  
6.671  
6.666  
6.663  
6.659  
6.653  
6.648  
6.645  
6.641  
6.635  
6.630  
6.627  
6.623  
3.144  
3.116  
3.112  
3.108  
3.080  
1.938  
1.923  
1.909  
1.895  
1.880  
1.853  
1.842  
1.836  
1.827  
1.819  
1.812  
1.803  
1.796  
1.791  
1.749  
1.735  
1.729  
1.720  
1.715  
1.704  
1.687  
1.672  
1.477  
1.462  
1.445  
1.429  
1.060  
1.046  
1.031  
1.003  
0.988  
0.974  
0.003

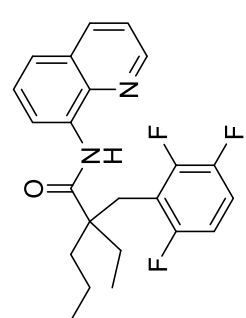

**3k**

<sup>1</sup>H NMR (500 MHz, CDCl<sub>3</sub>)

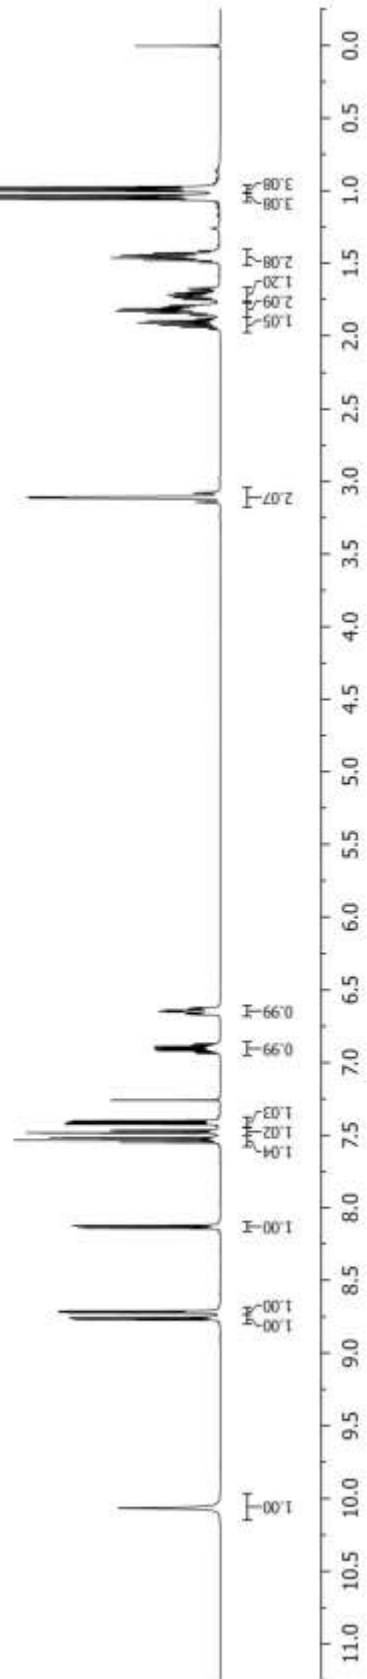



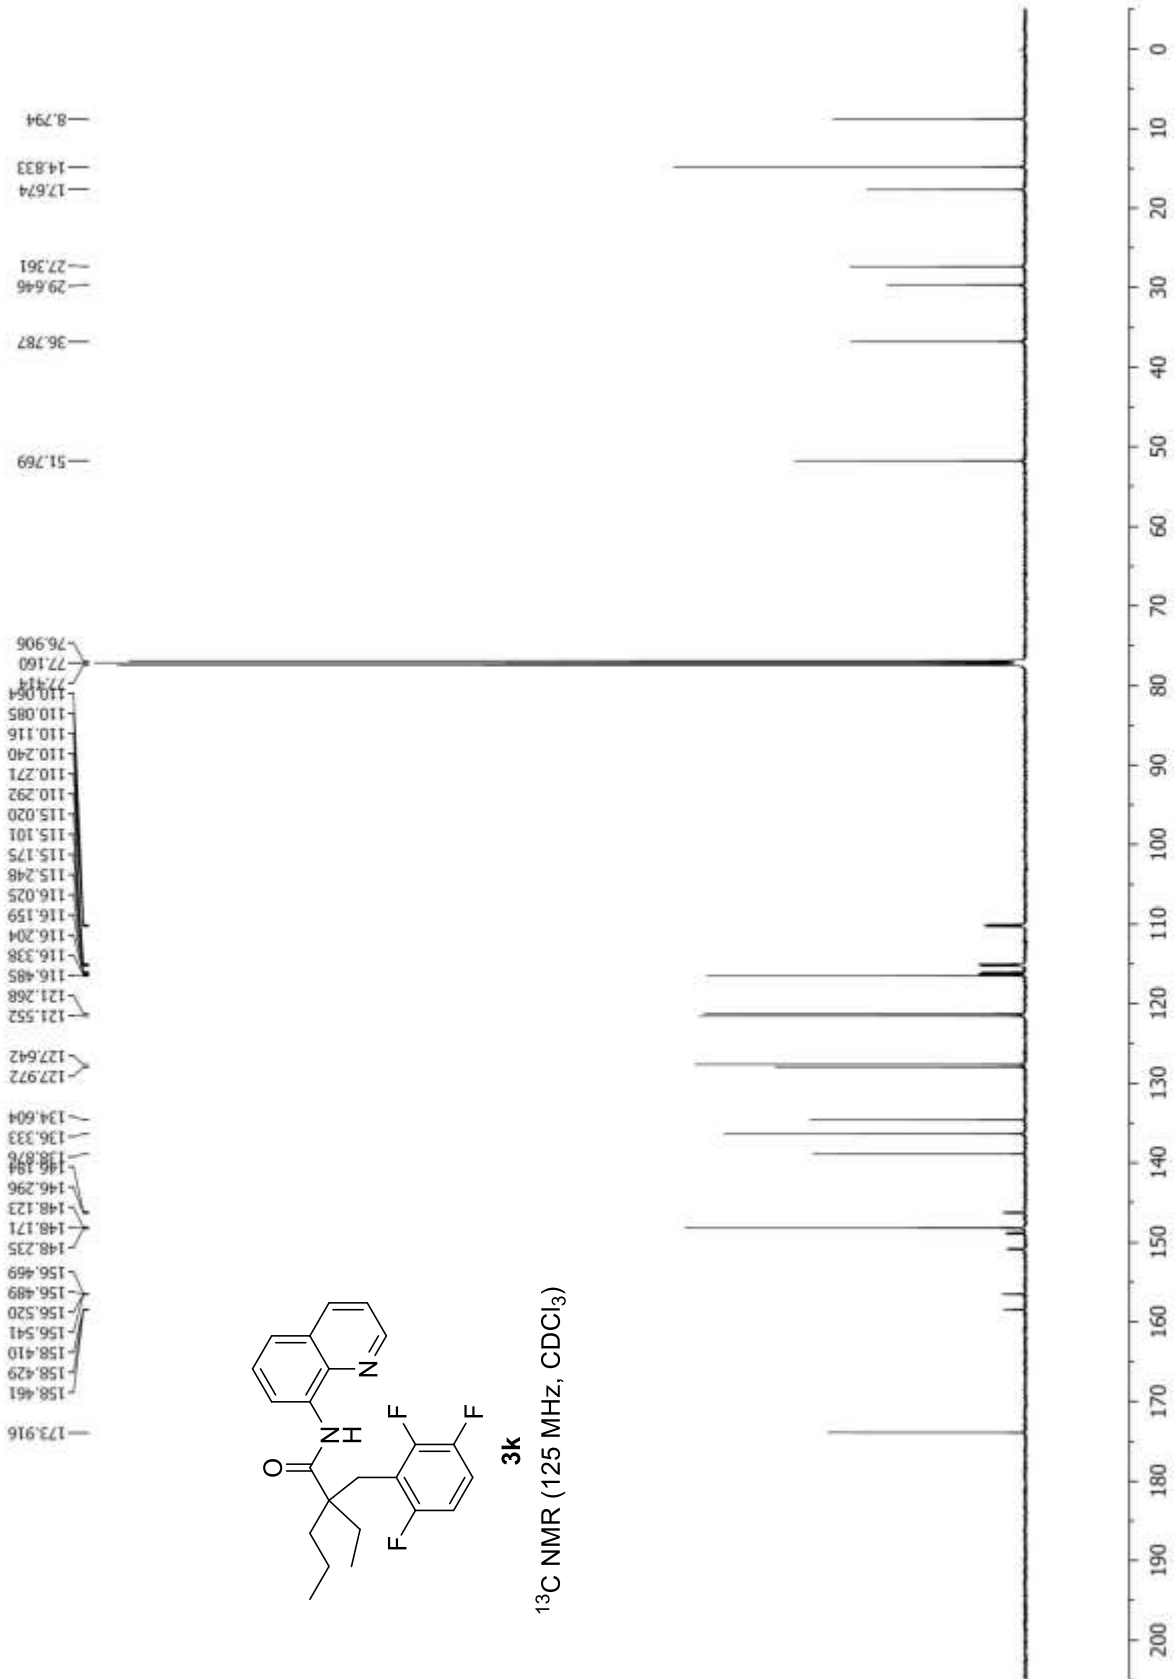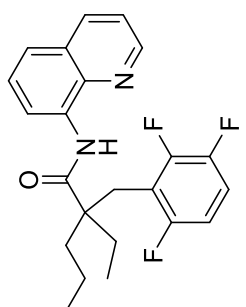

**3k**

<sup>13</sup>C NMR (125 MHz, CDCl<sub>3</sub>)

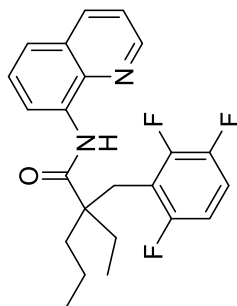

**3k**

<sup>19</sup>F NMR (471 MHz, CDCl<sub>3</sub>)

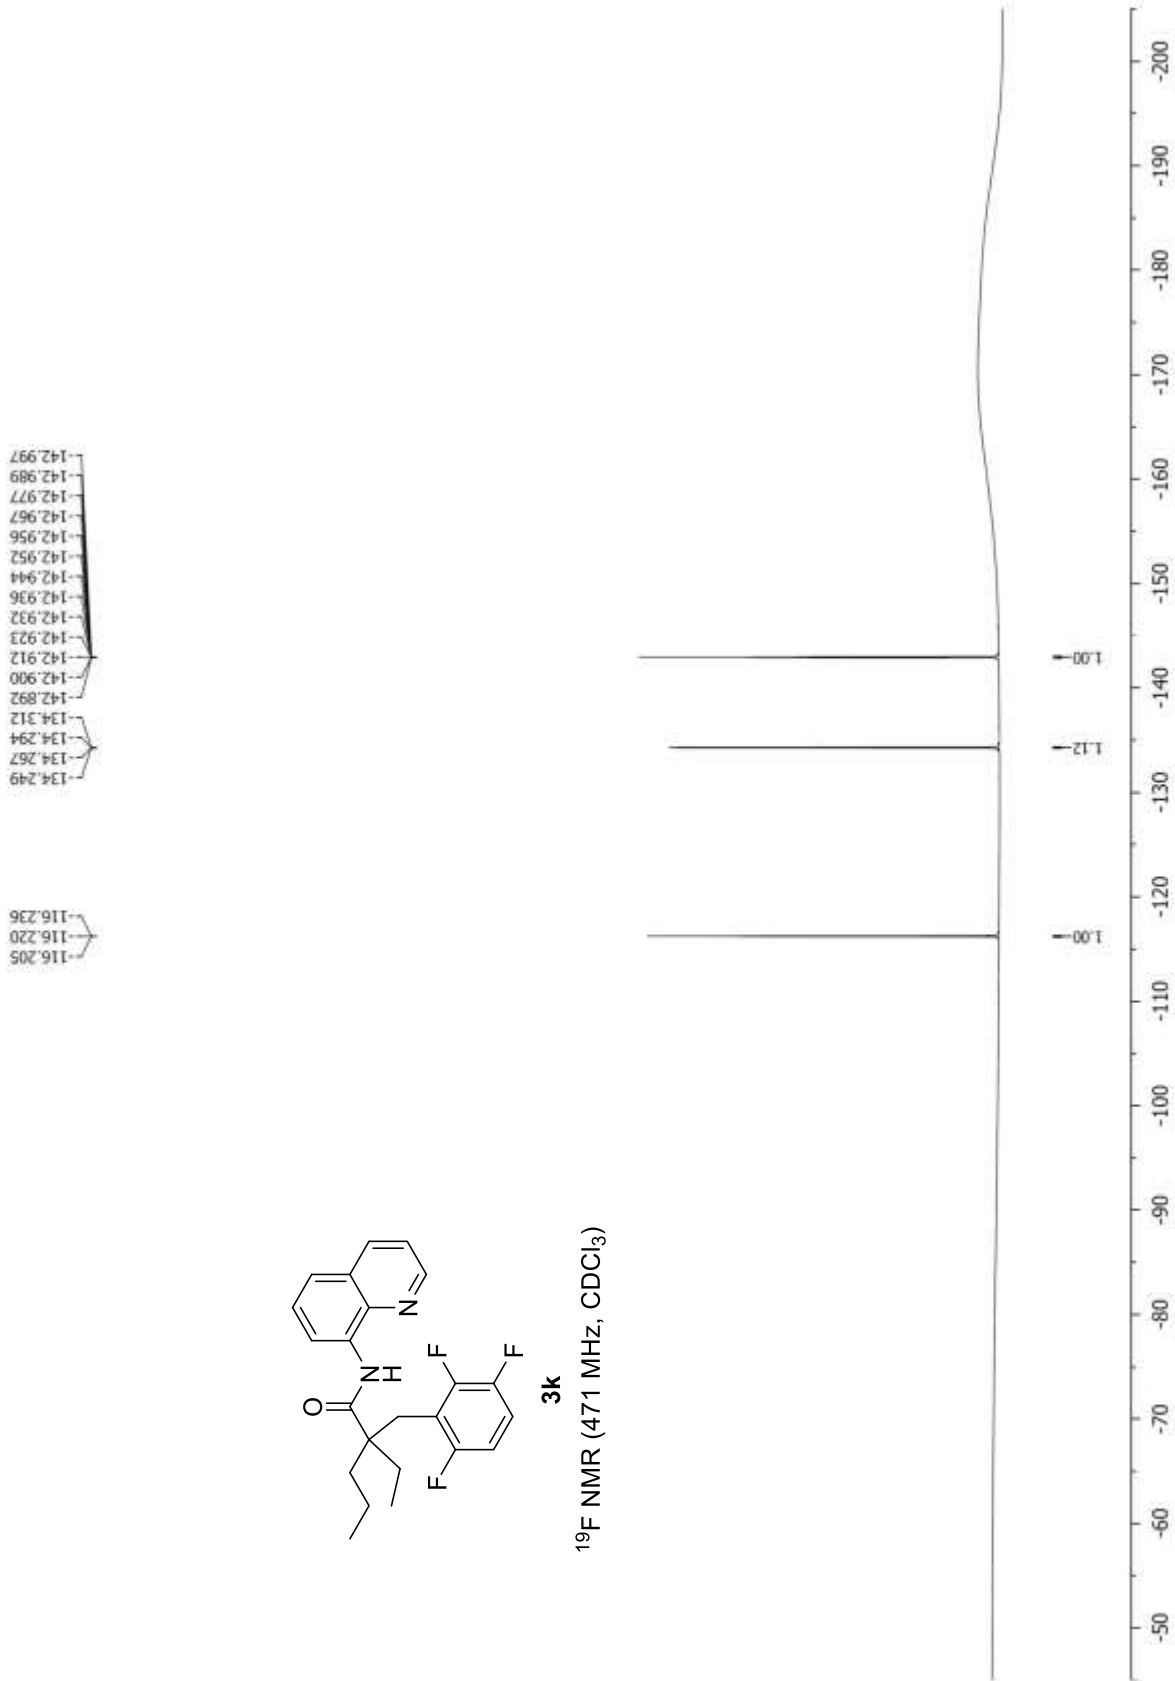

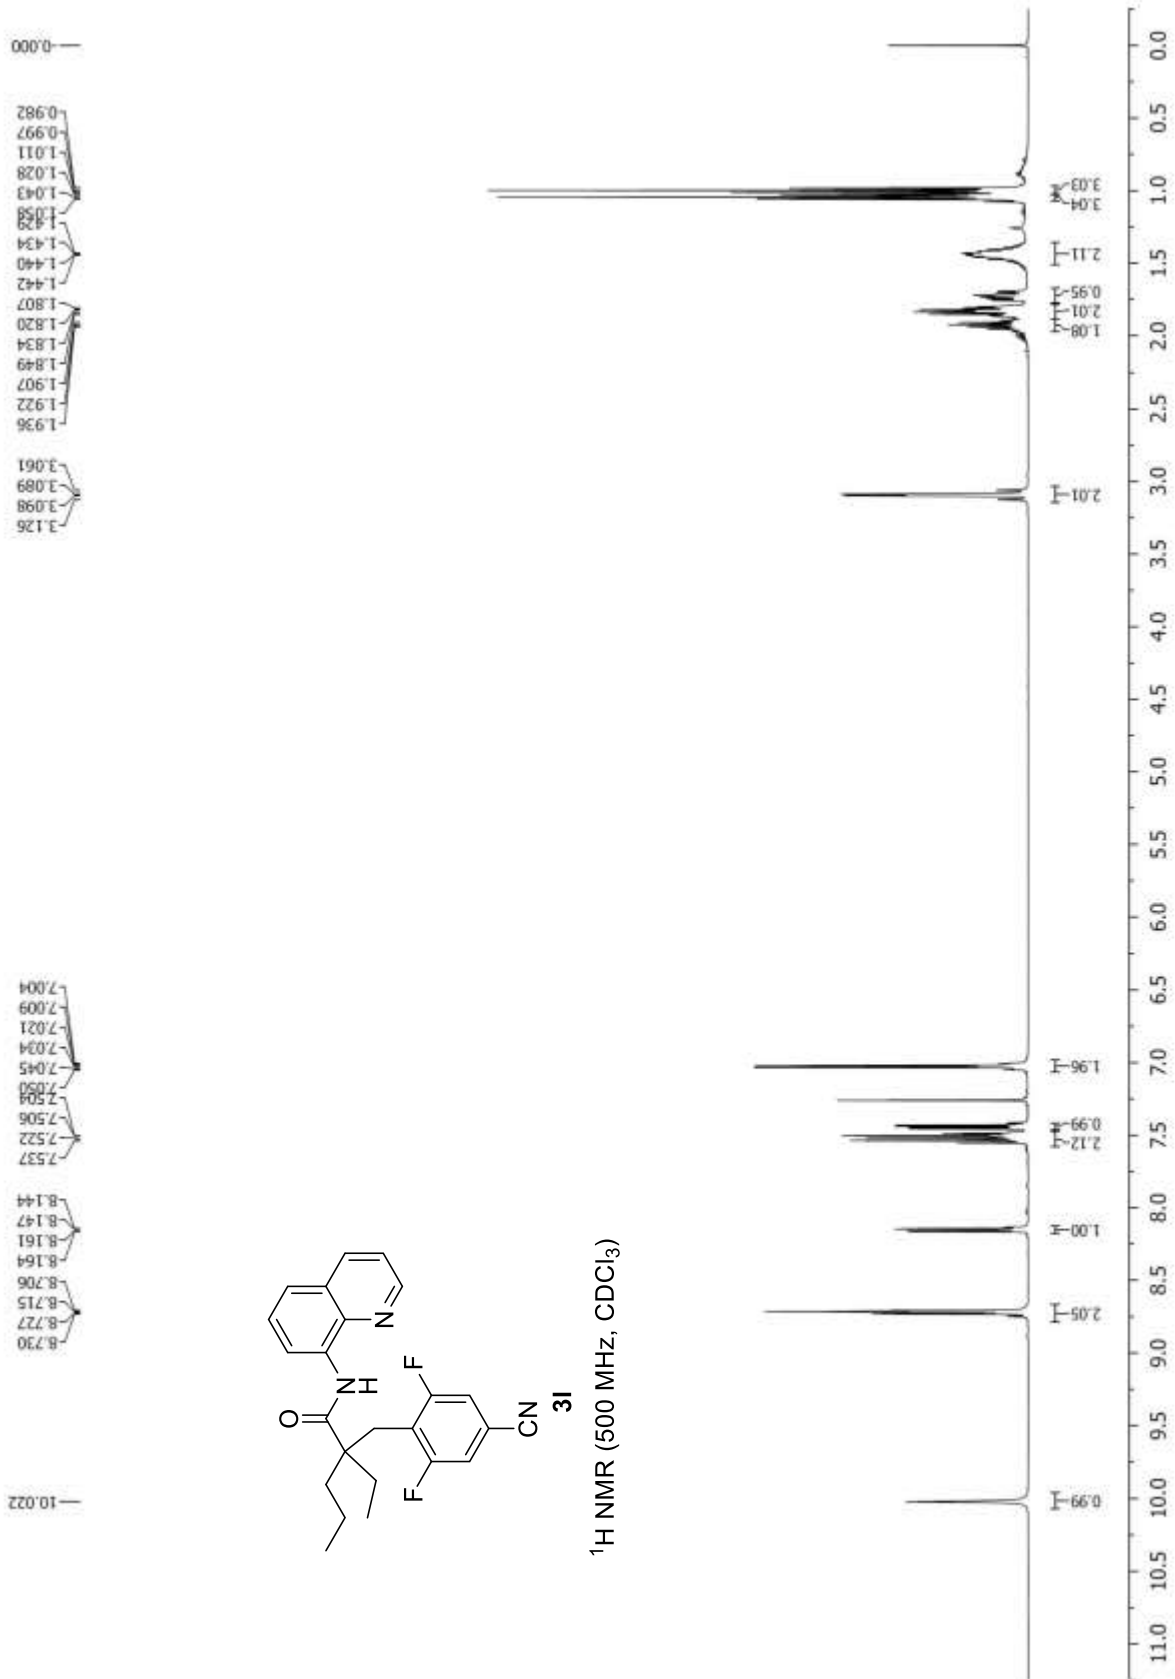

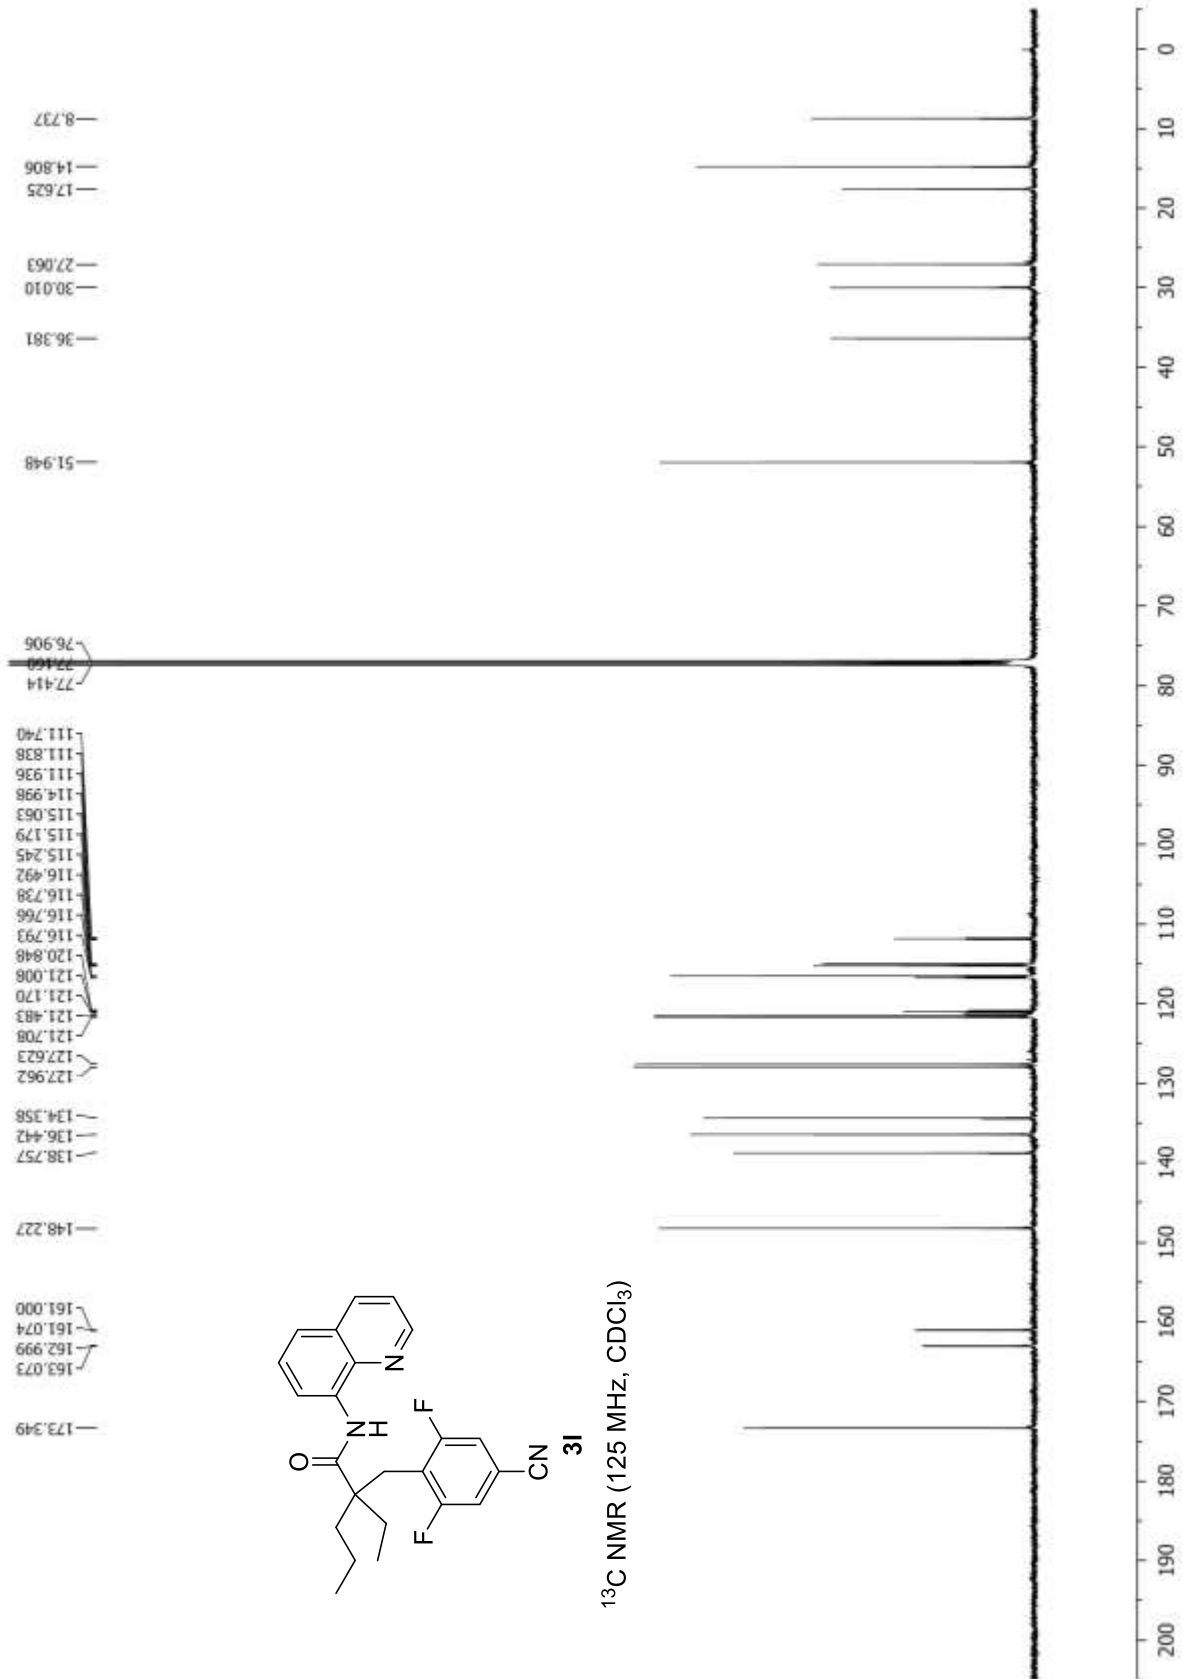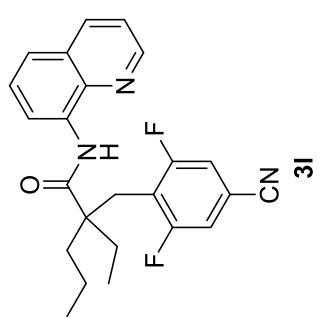

<sup>13</sup>C NMR (125 MHz, CDCl<sub>3</sub>)

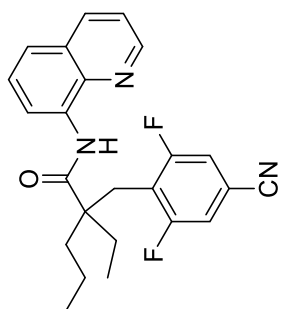

$^{19}\text{F}$  NMR (471 MHz,  $\text{CDCl}_3$ )

107.043  
107.056

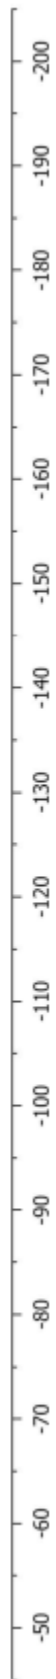

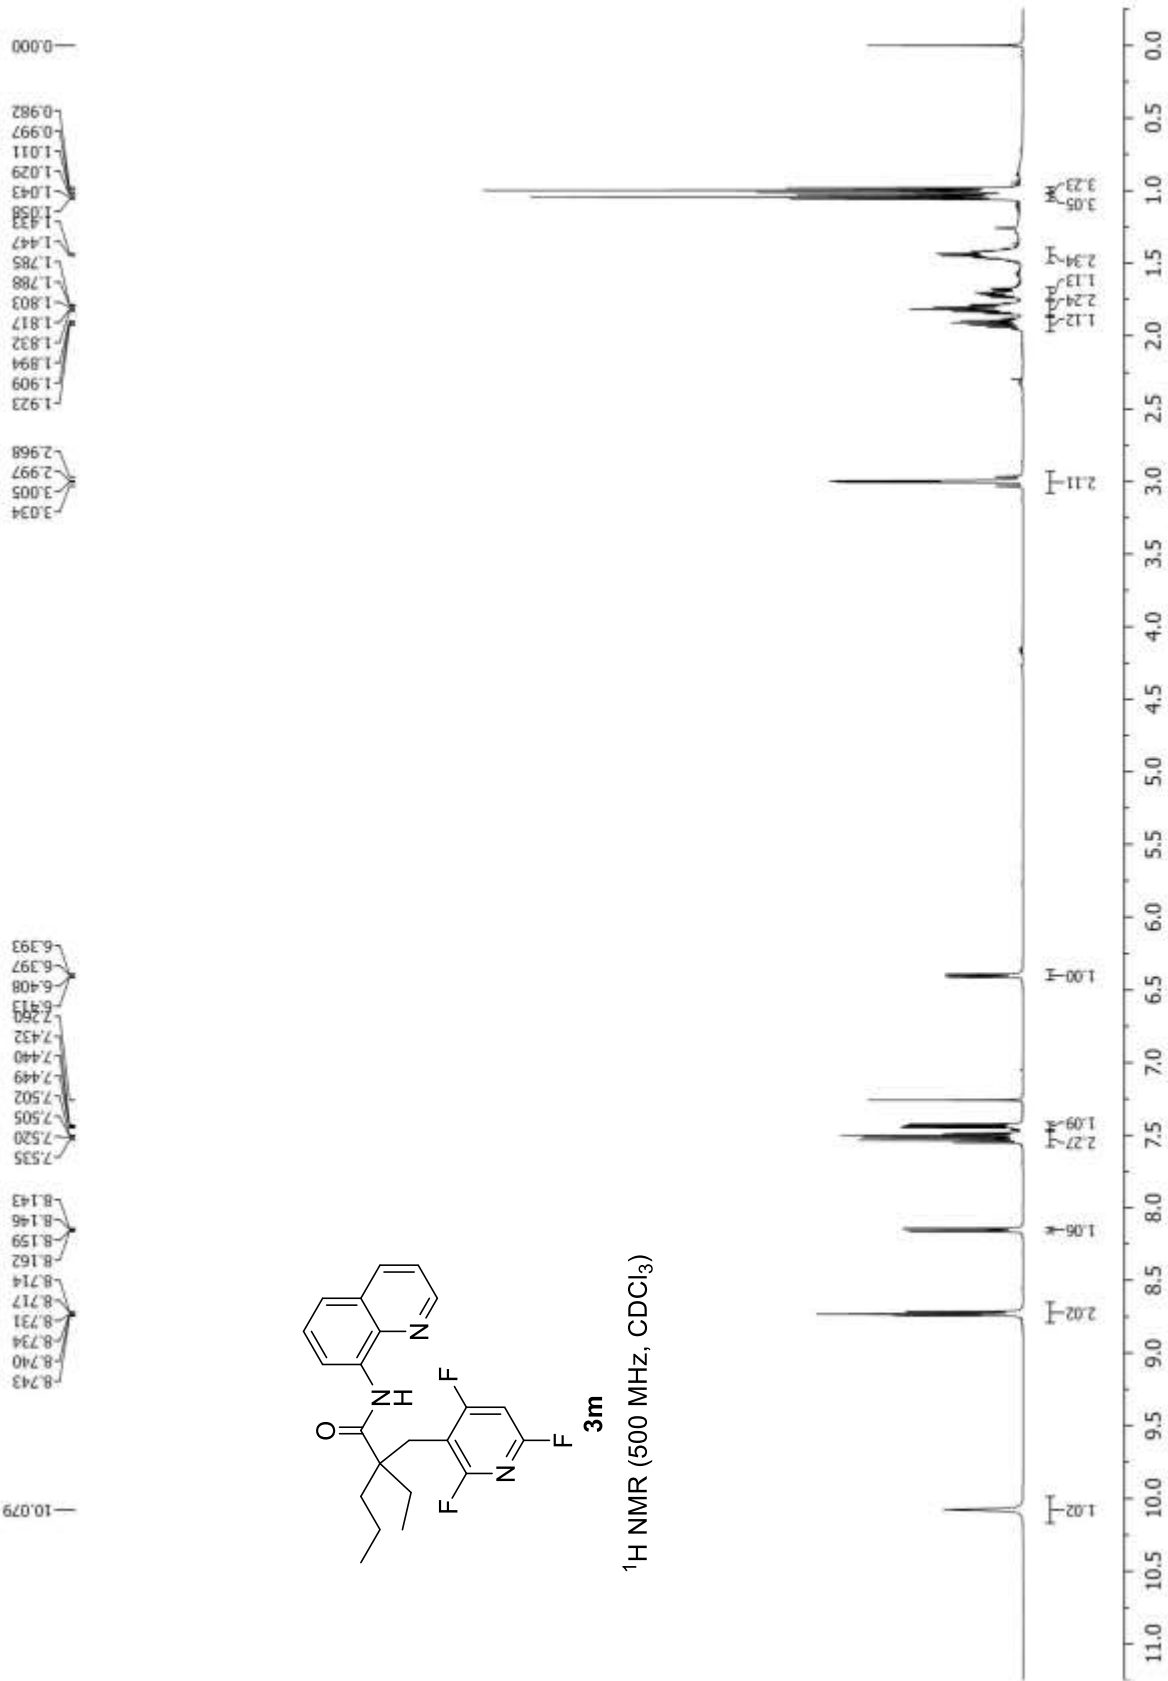

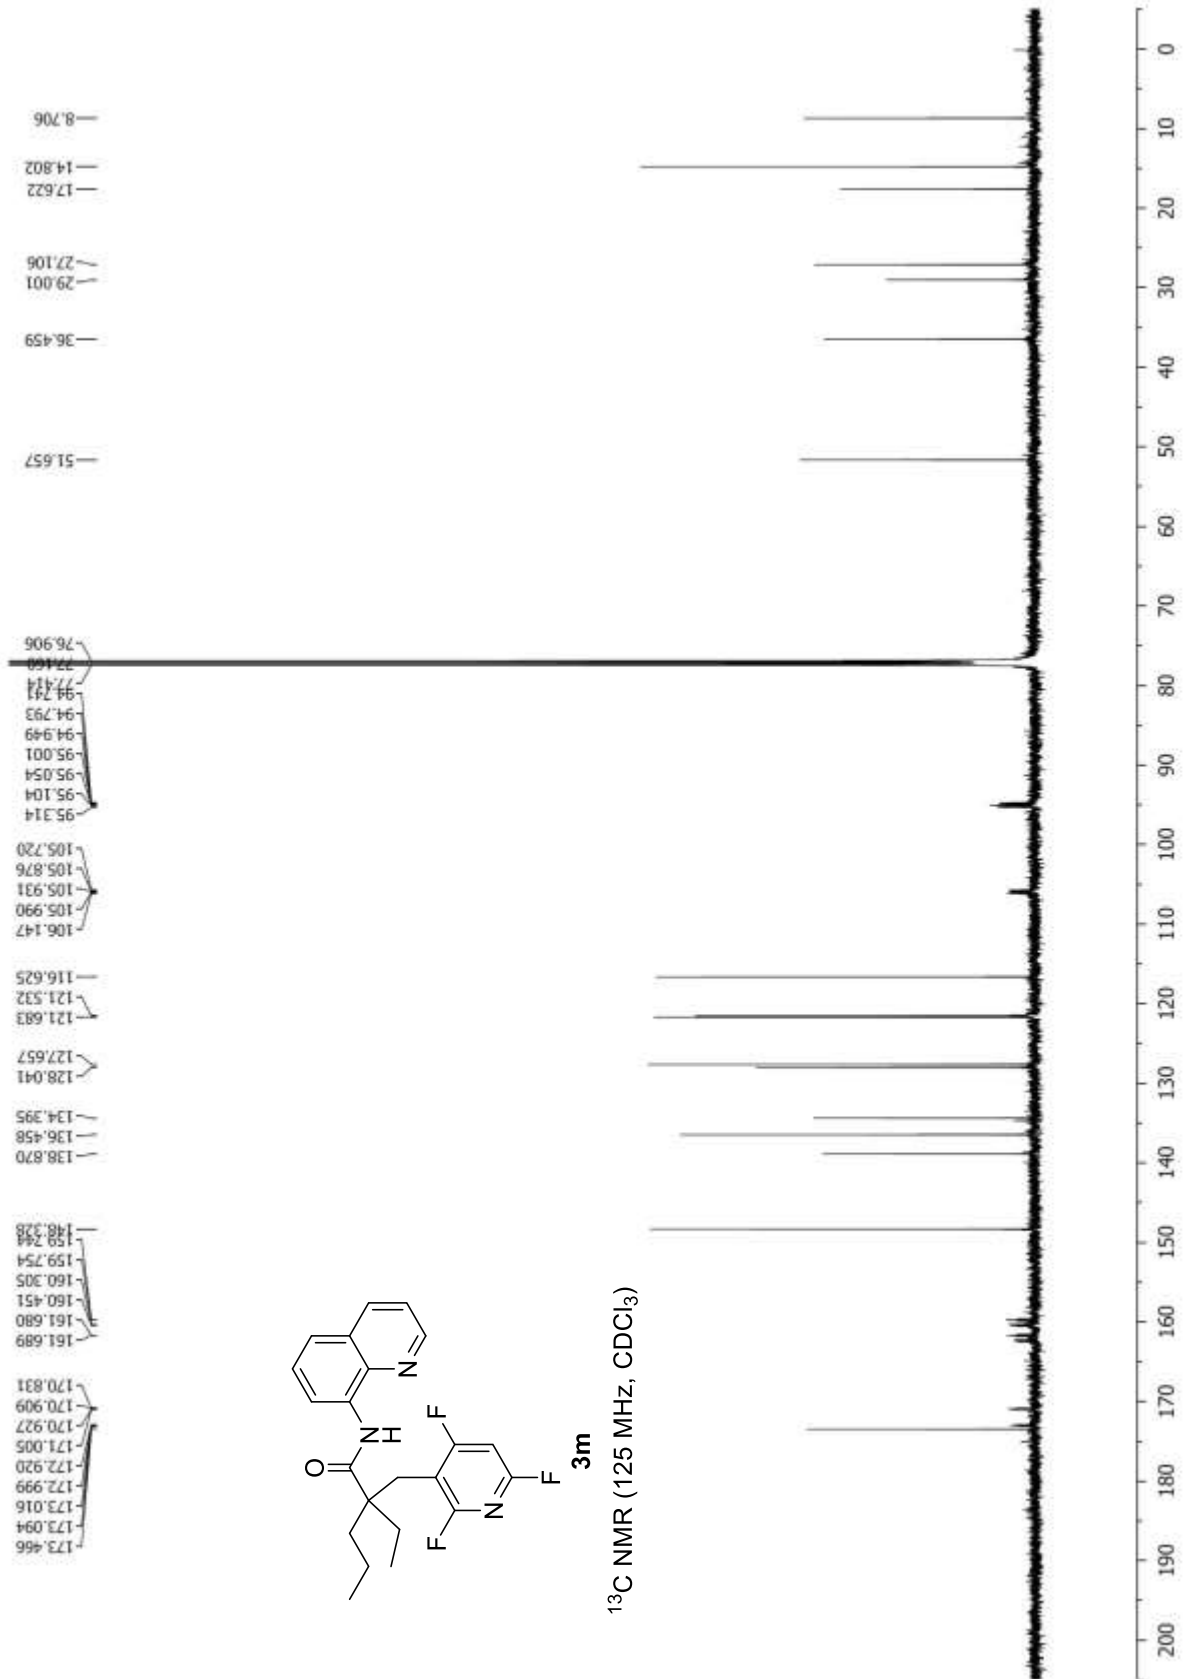

92.497  
92.514  
92.539  
92.555  
92.579  
92.596

66.255  
66.285  
66.322  
67.611  
67.640  
67.653  
67.682

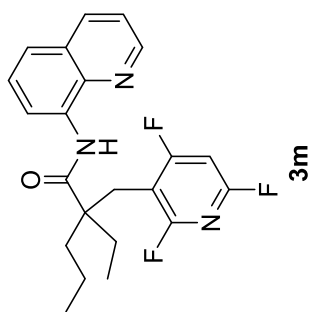

<sup>19</sup>F NMR (471 MHz, CDCl<sub>3</sub>)

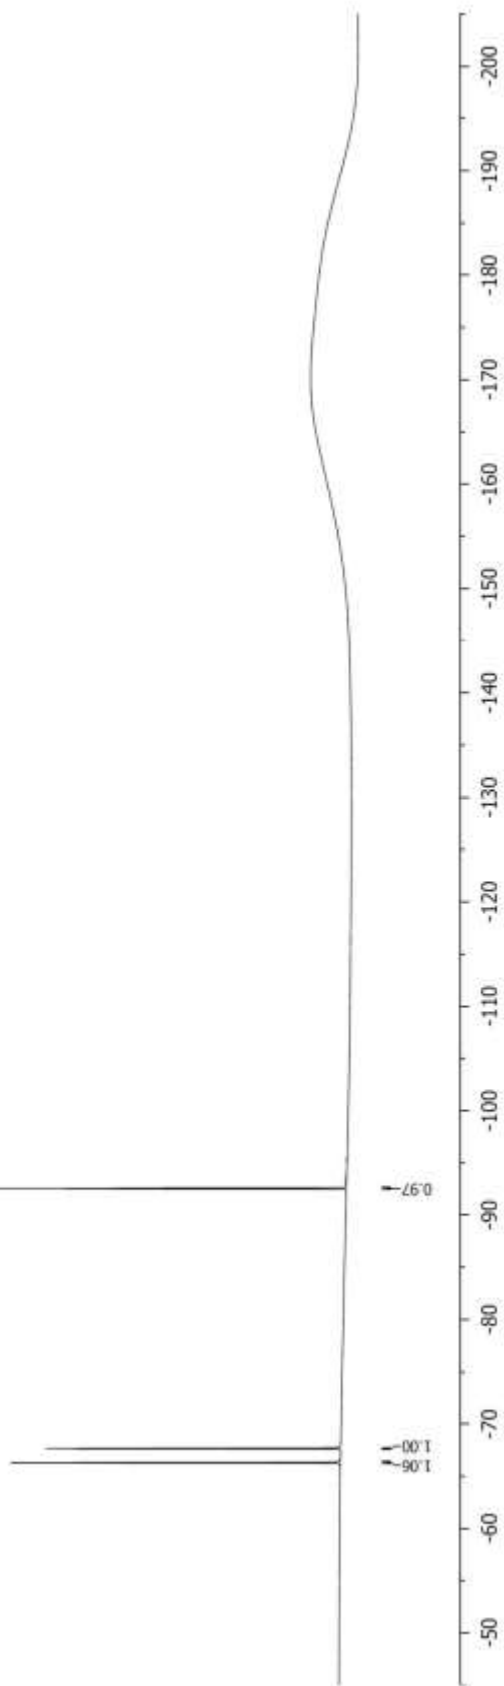



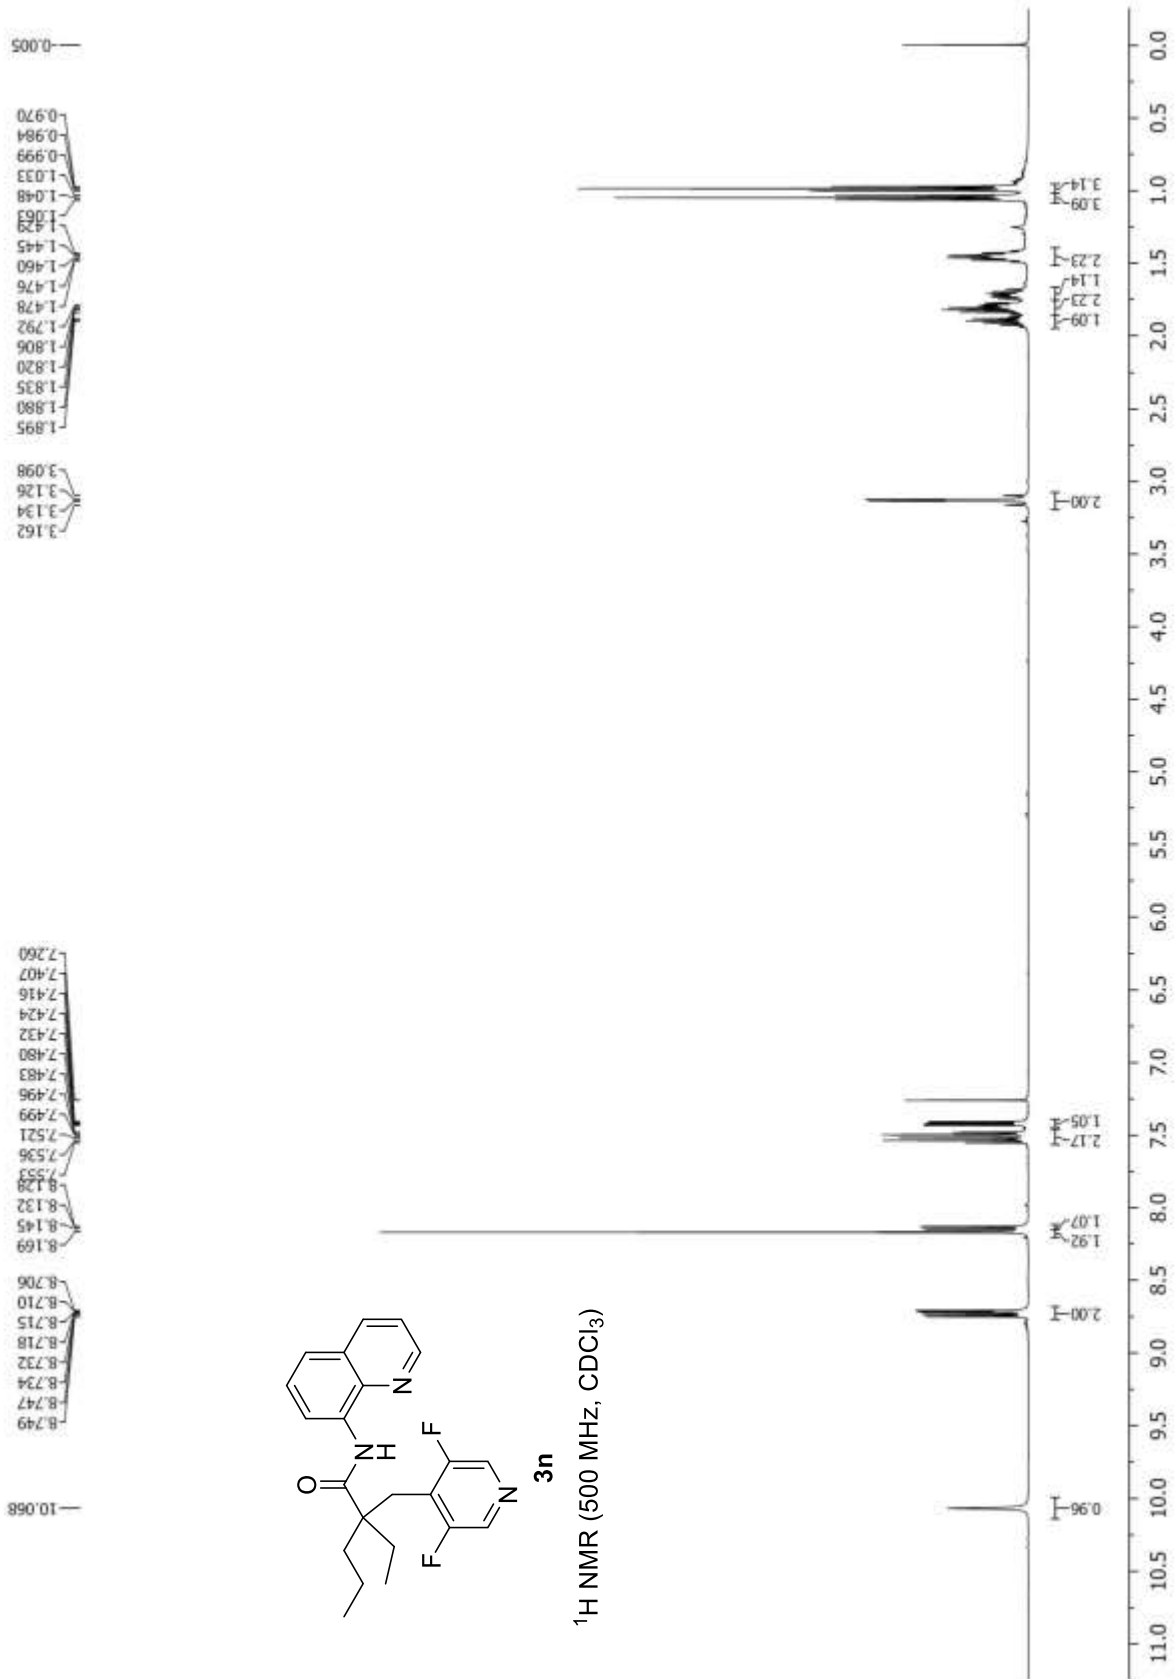

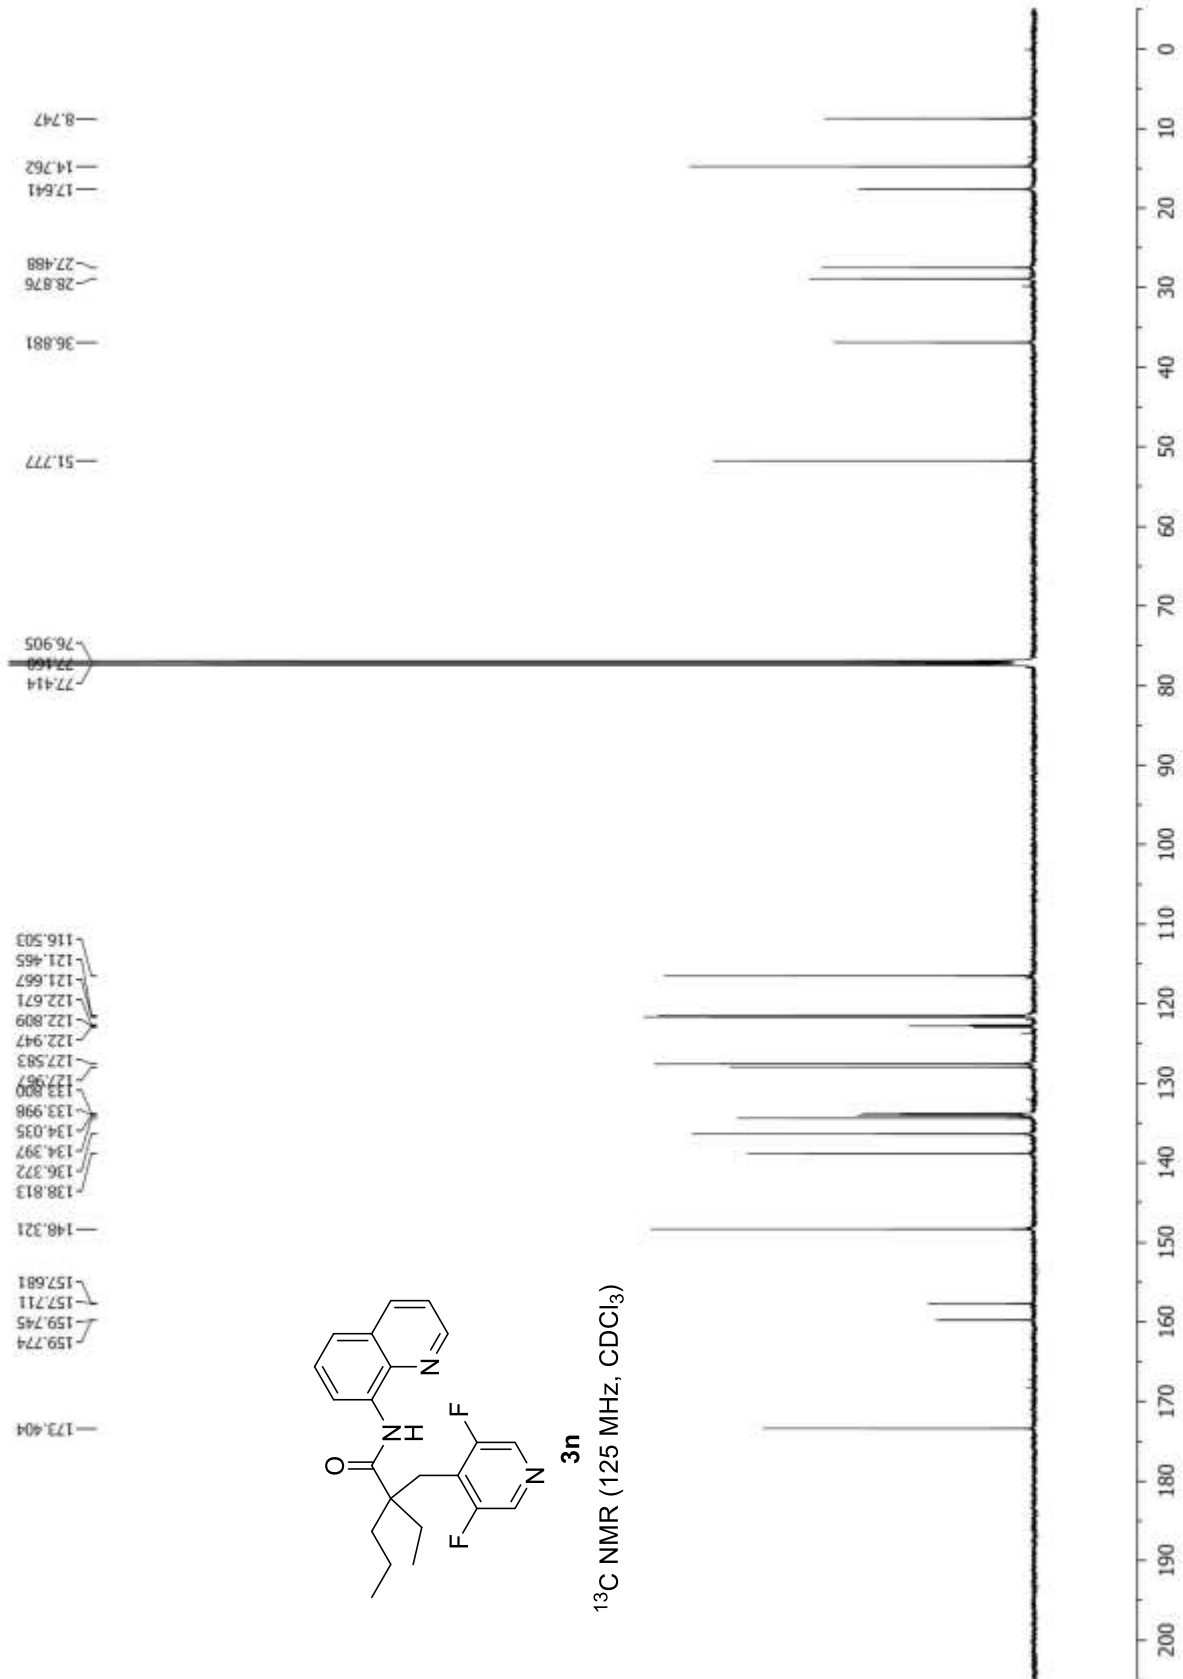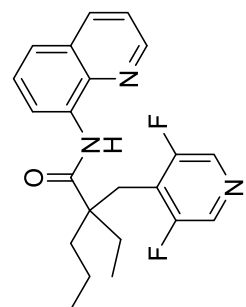

3n

<sup>13</sup>C NMR (125 MHz, CDCl<sub>3</sub>)

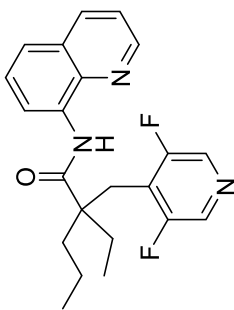

3n

$^{19}\text{F}$  NMR (471 MHz,  $\text{CDCl}_3$ )

-126.256

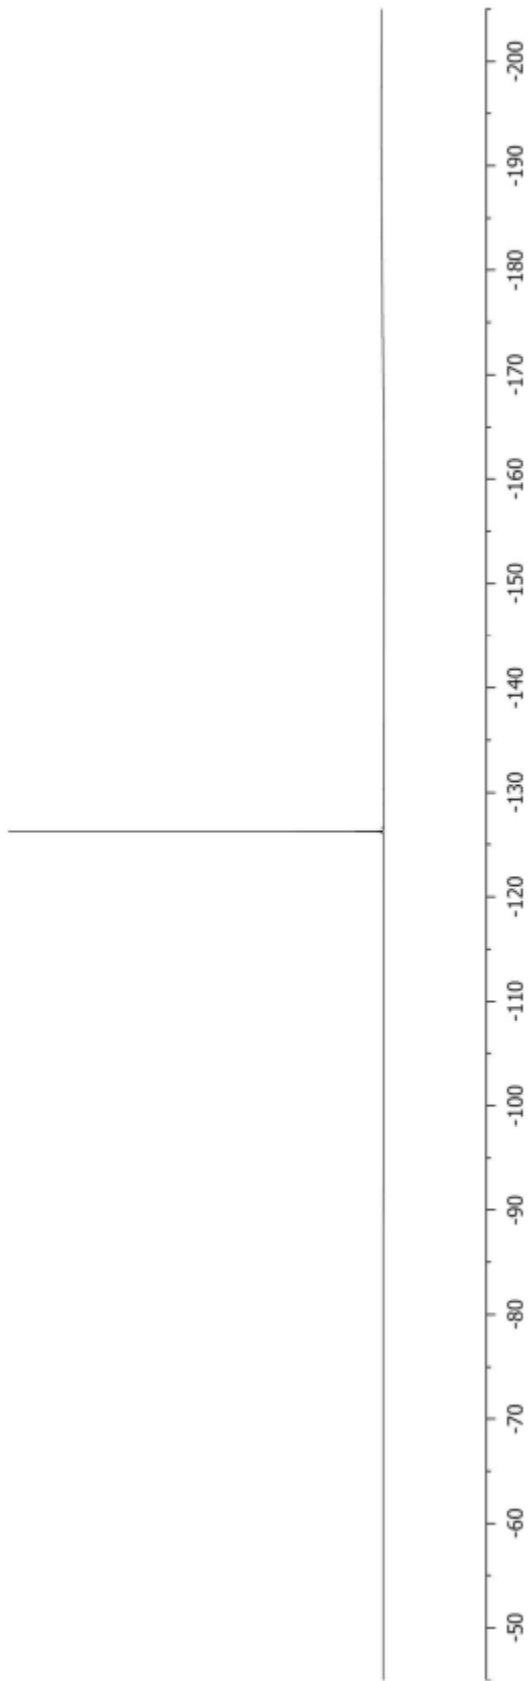

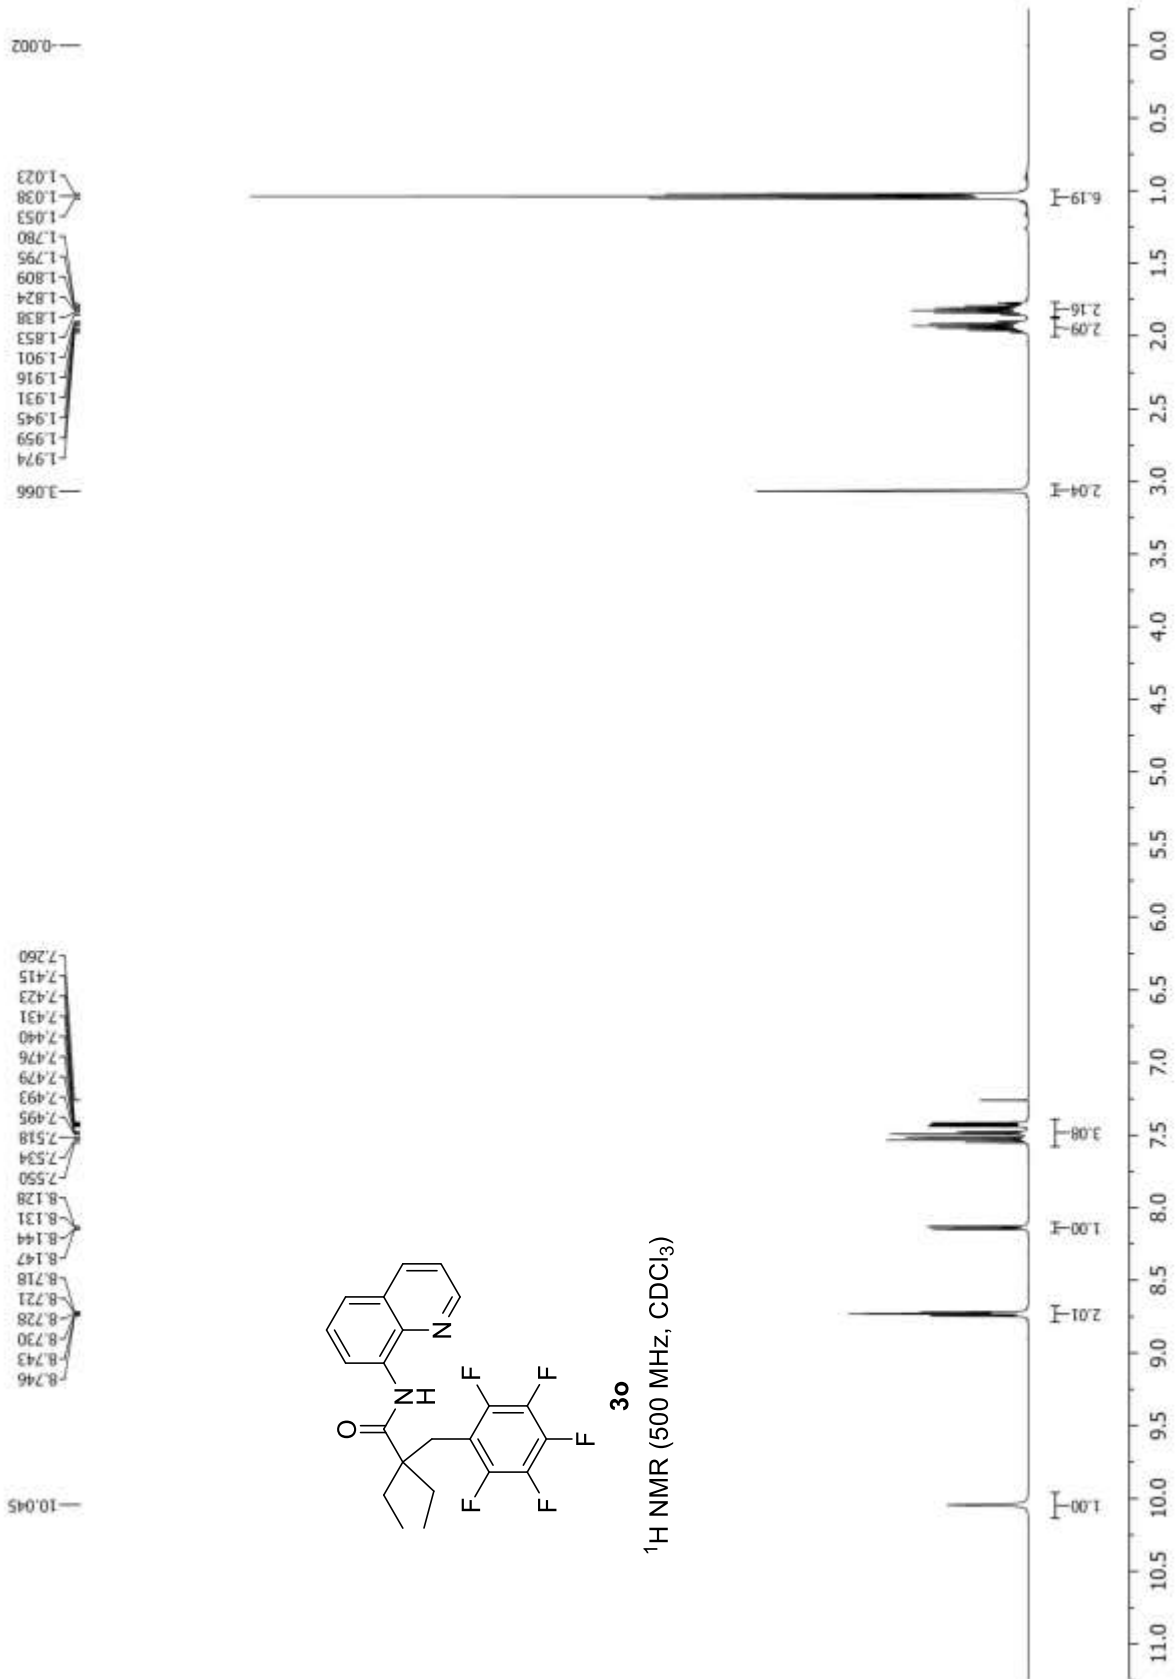

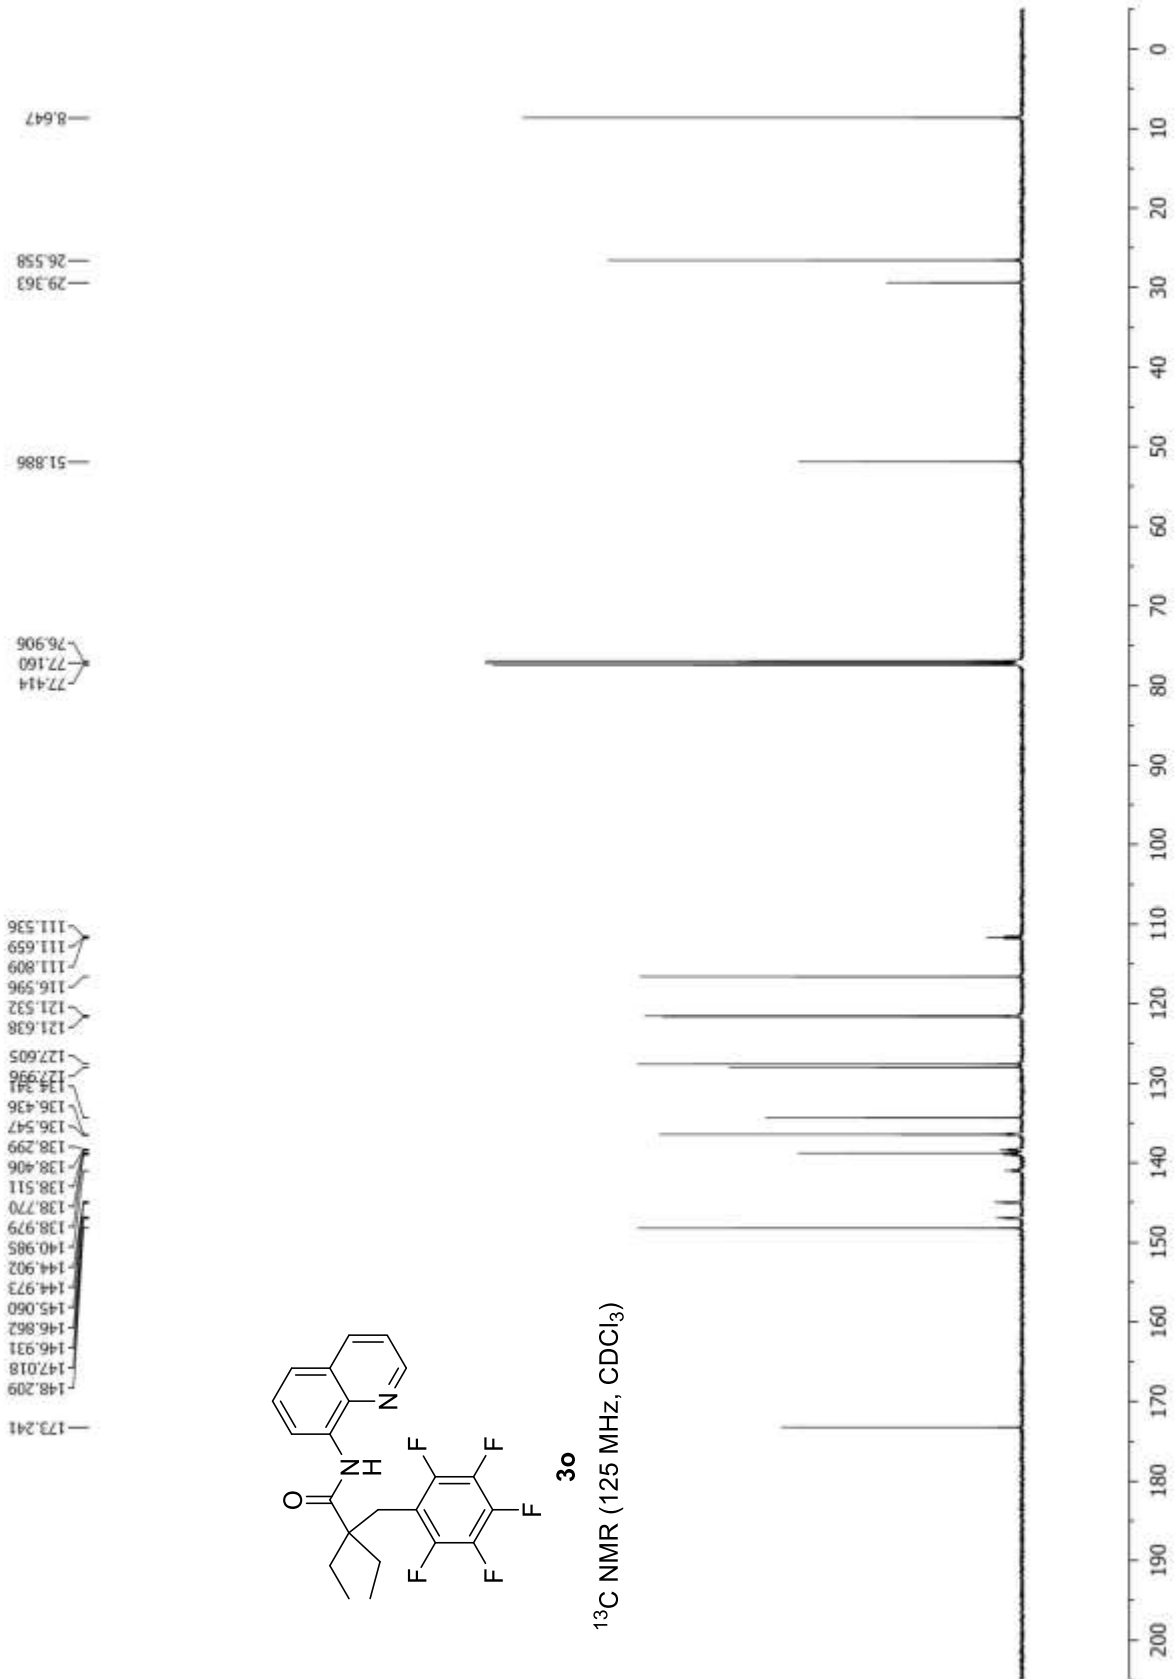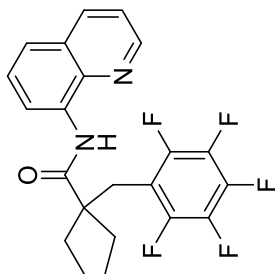

**3o**  
<sup>13</sup>C NMR (125 MHz, CDCl<sub>3</sub>)

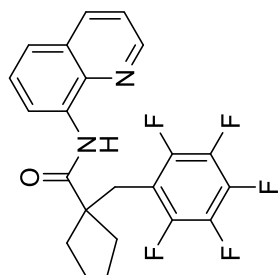

**3o**

<sup>19</sup>F NMR (471 MHz, CDCl<sub>3</sub>)

156.641  
156.686  
156.730  
163.126  
163.141  
163.172  
163.187  
163.217  
163.233

139.310  
139.326  
139.358  
139.374

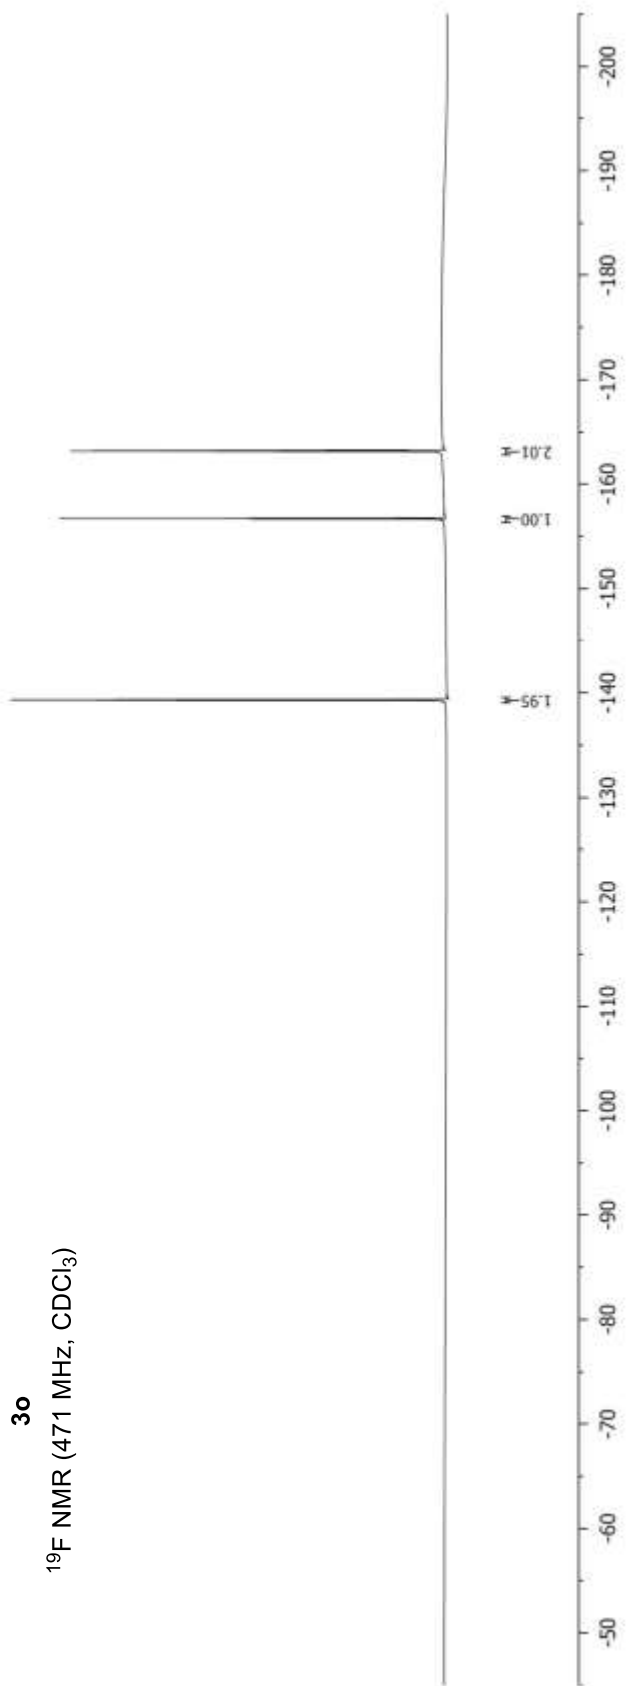

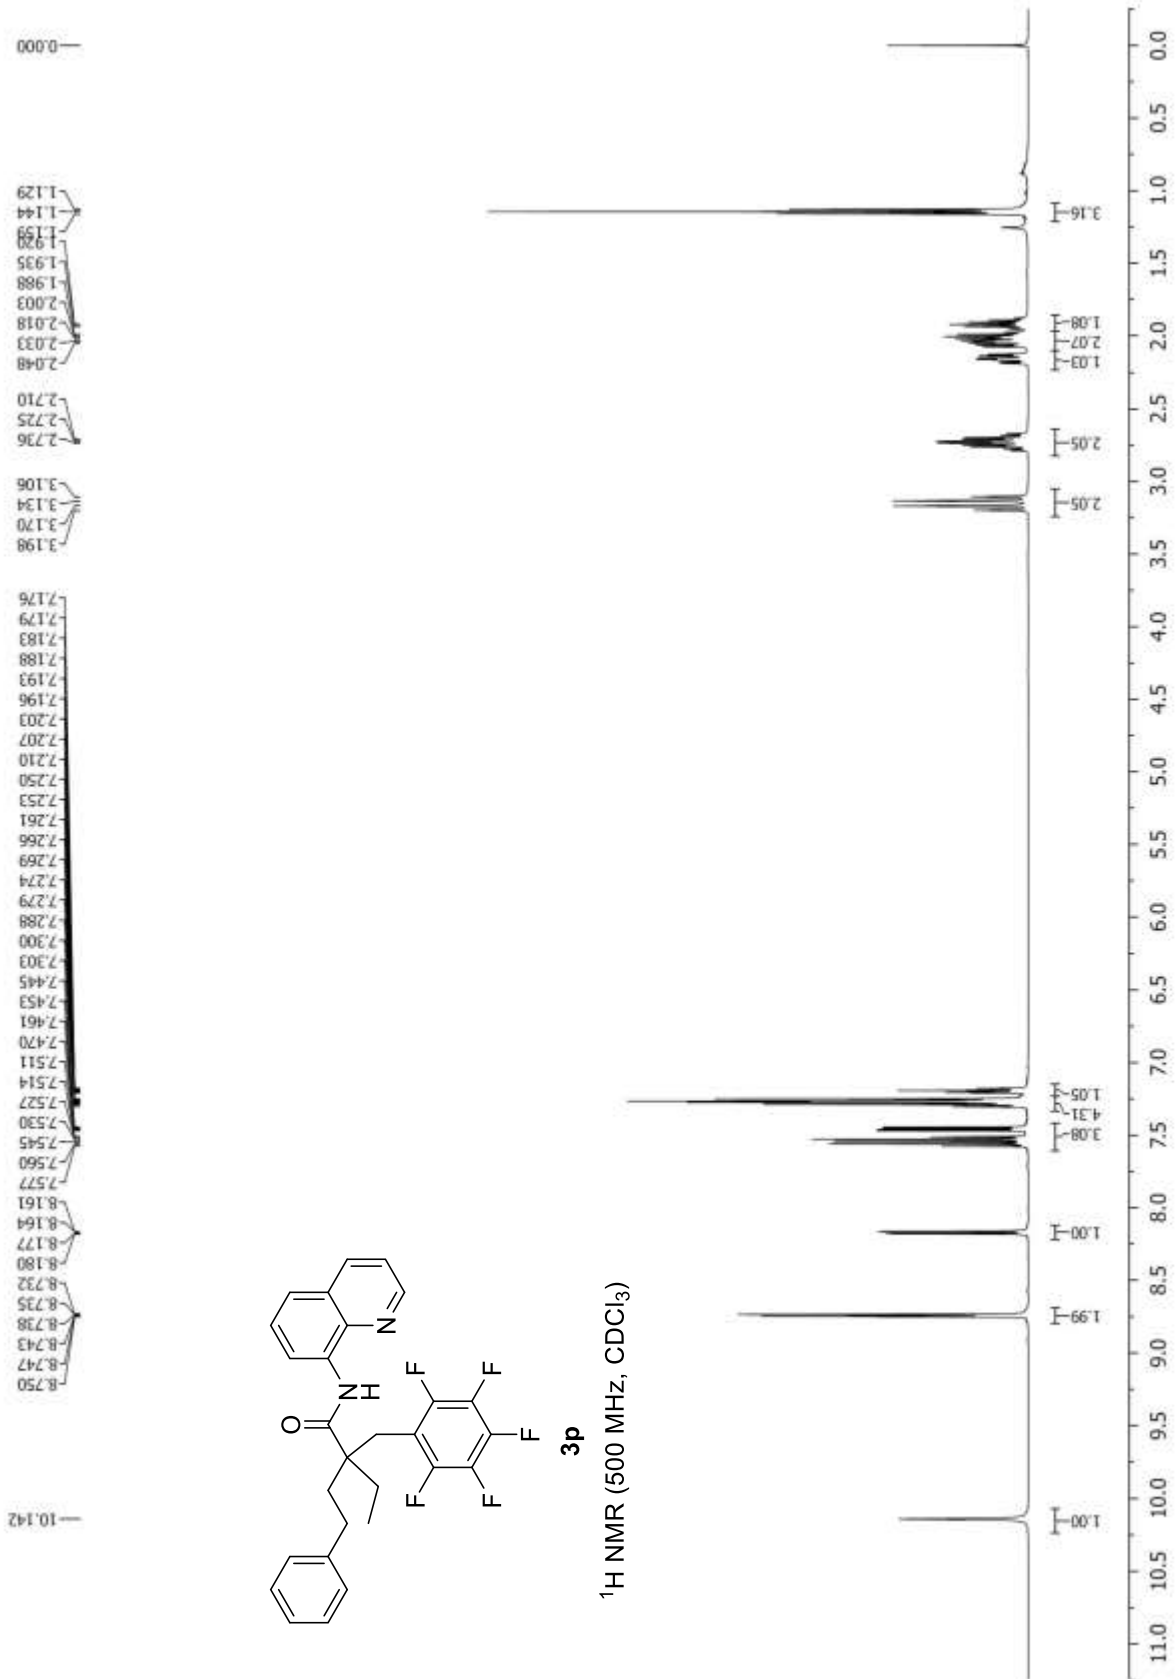

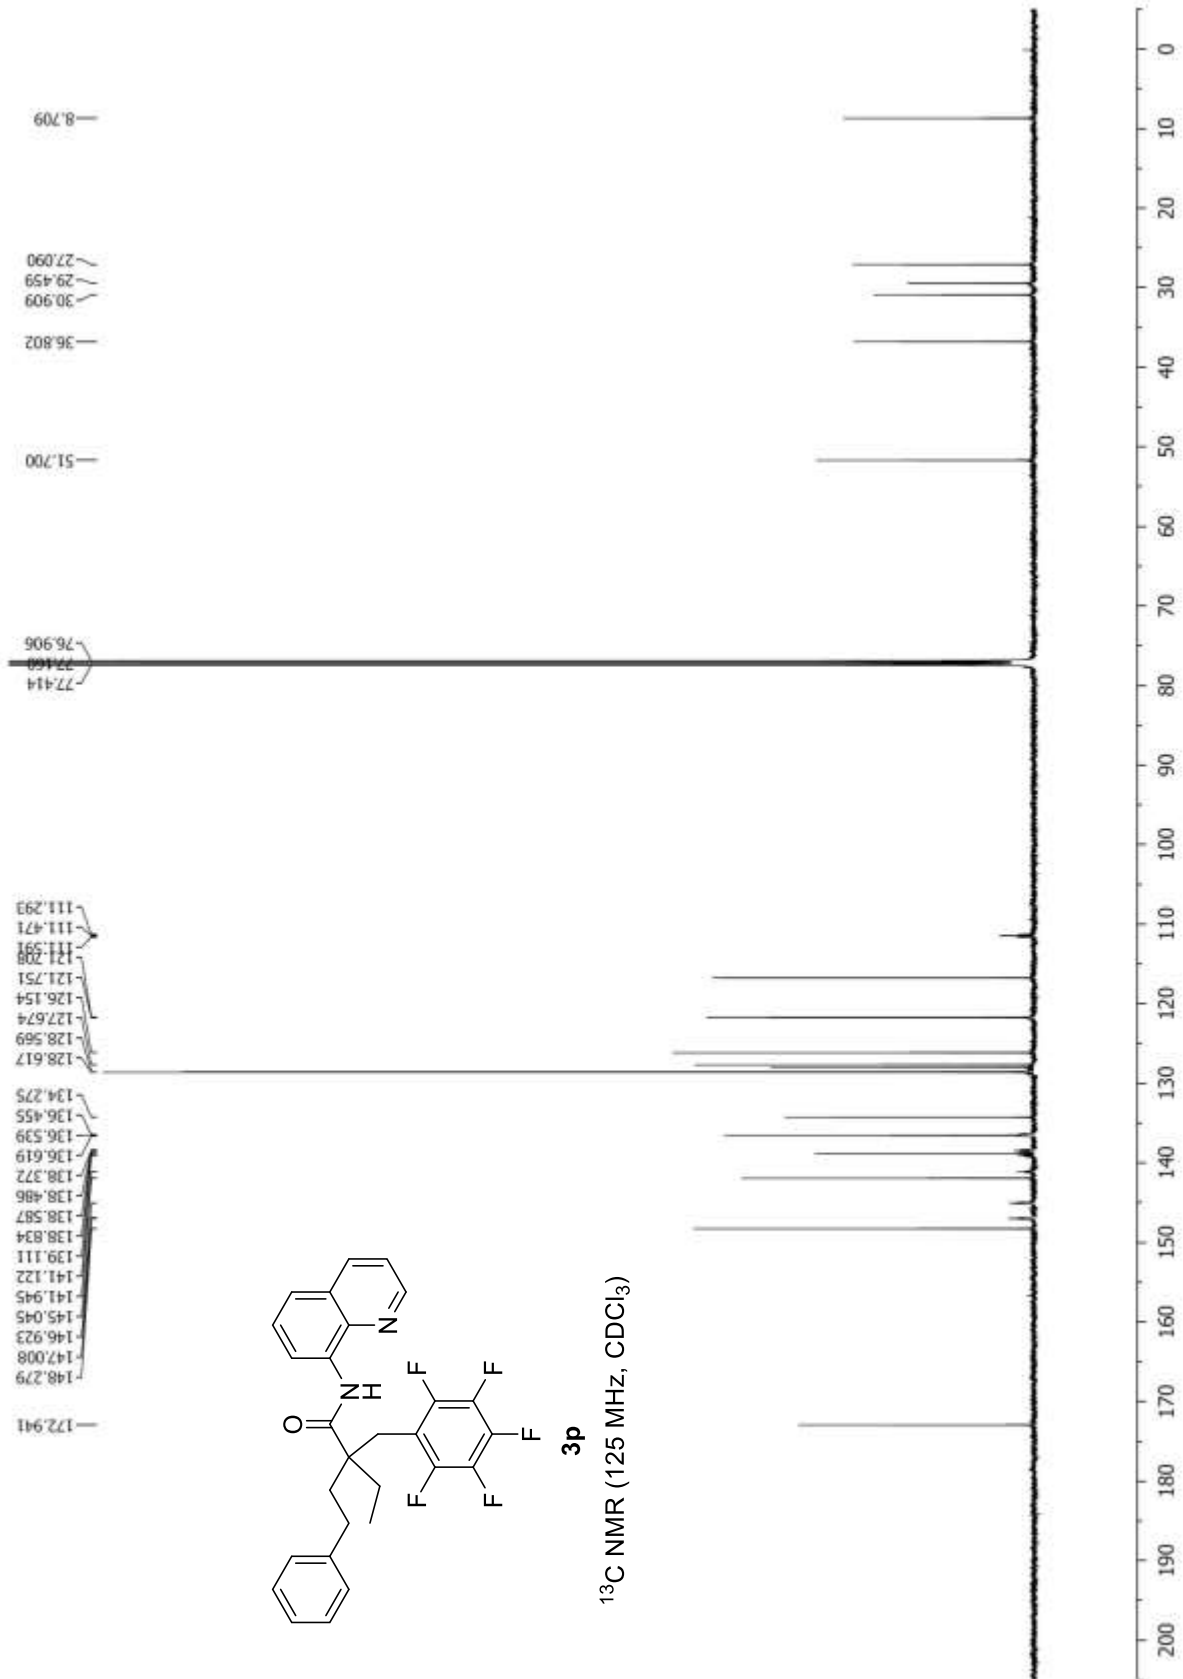





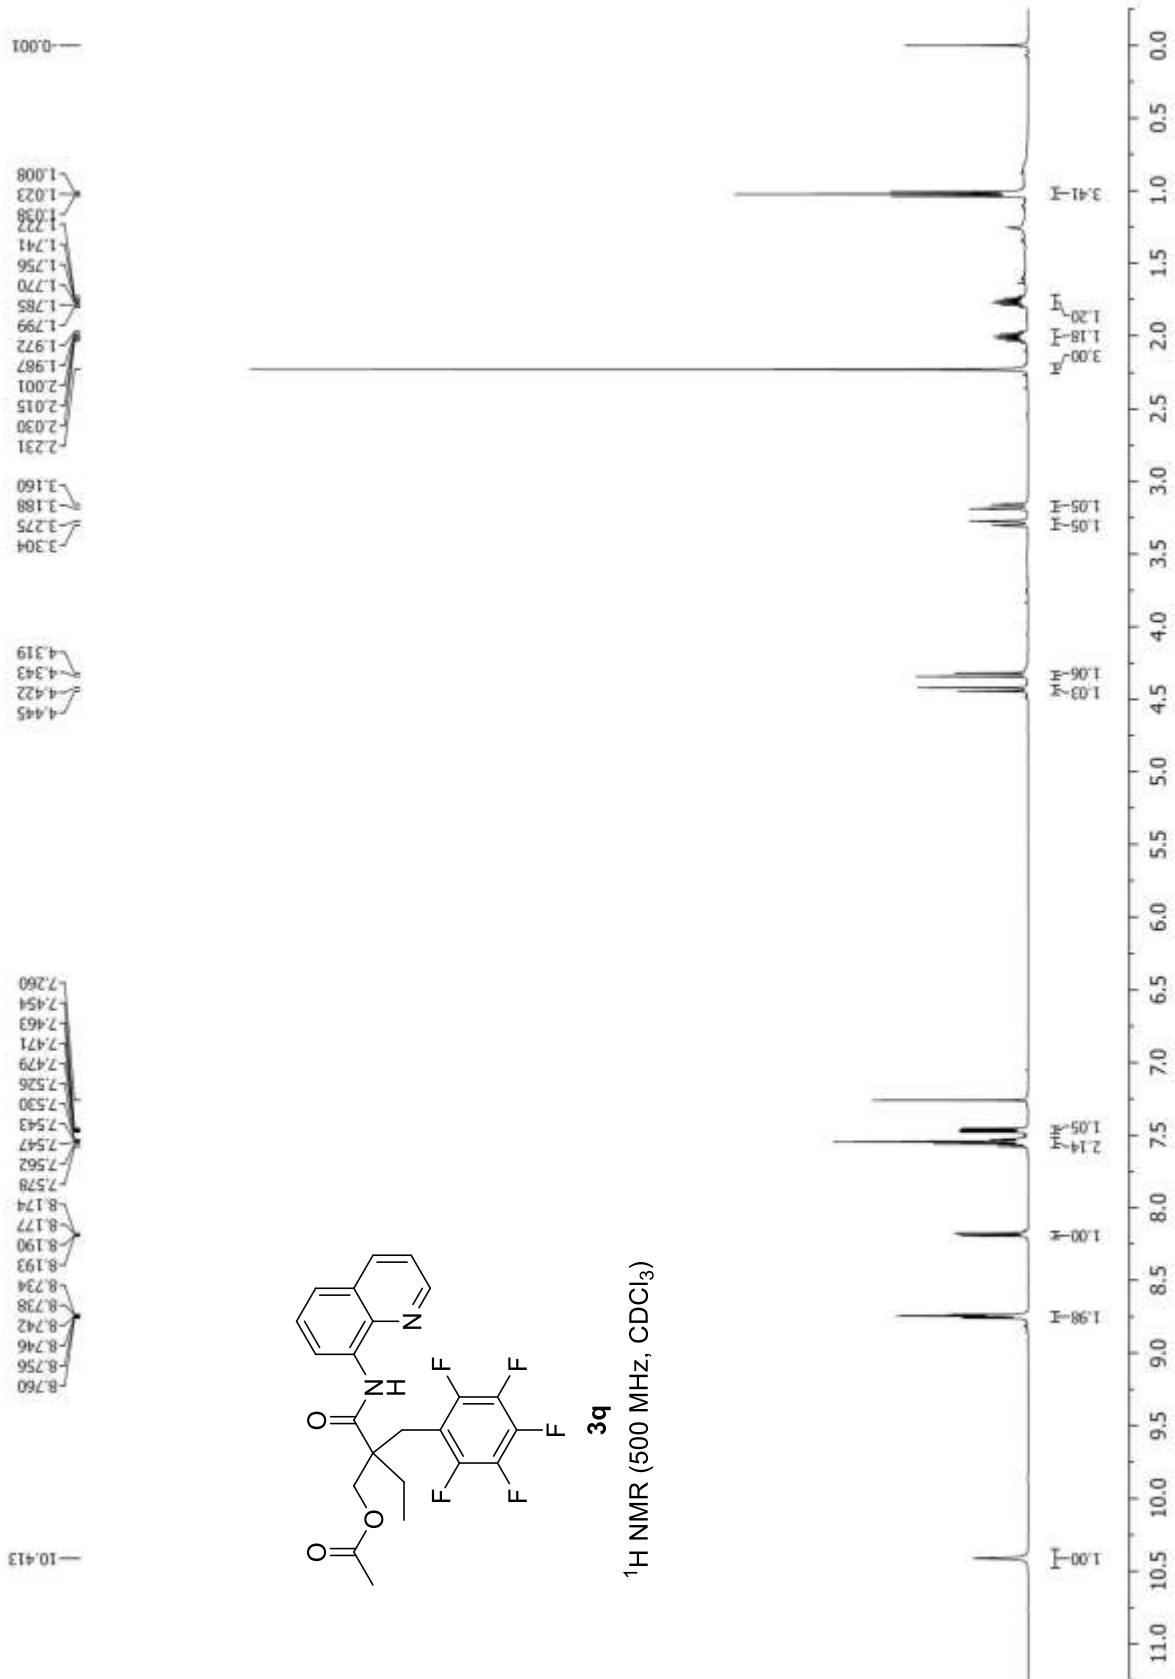

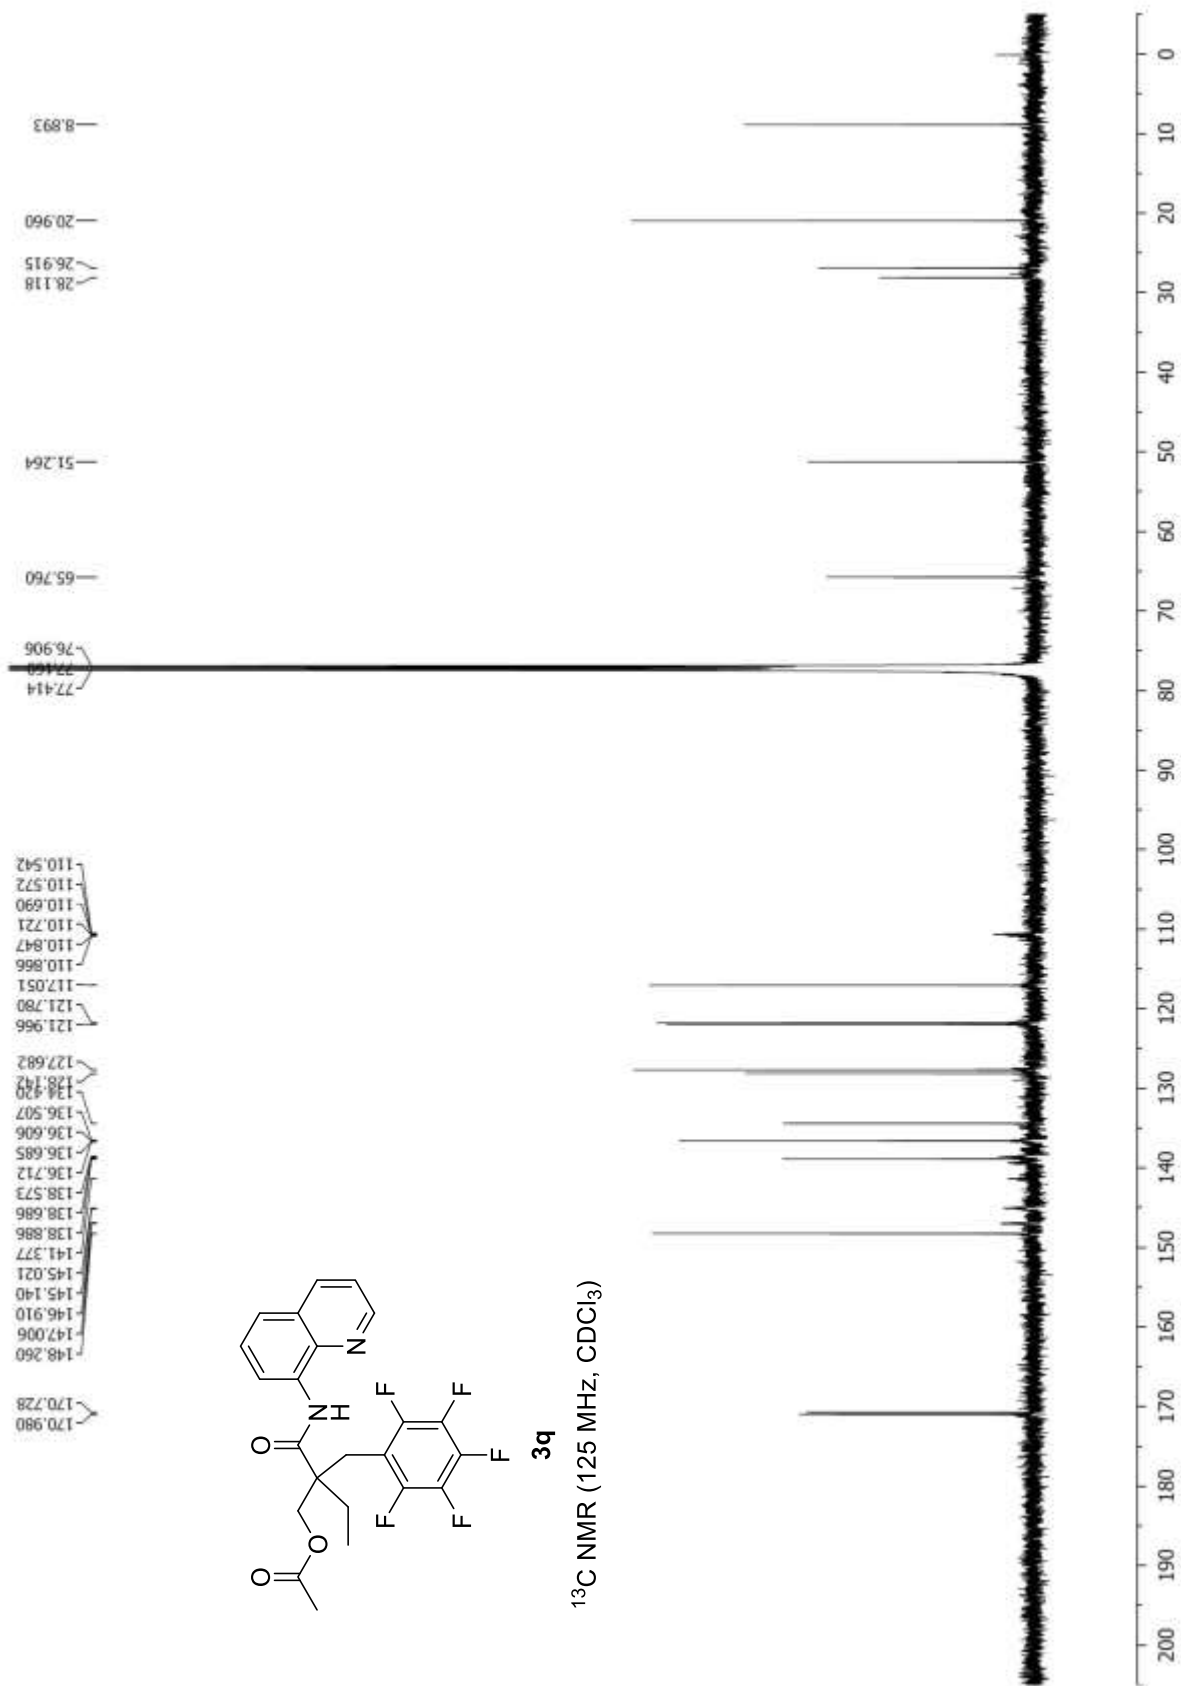

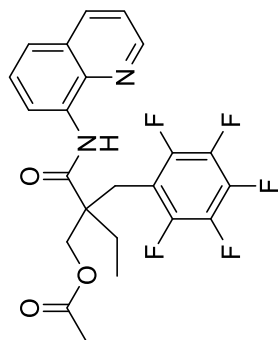

**3q**

<sup>19</sup>F NMR (471 MHz, CDCl<sub>3</sub>)

155.525  
155.570  
155.614  
162.308  
162.323  
162.353  
162.368  
162.398  
162.416

139.437  
139.453  
139.485  
139.501

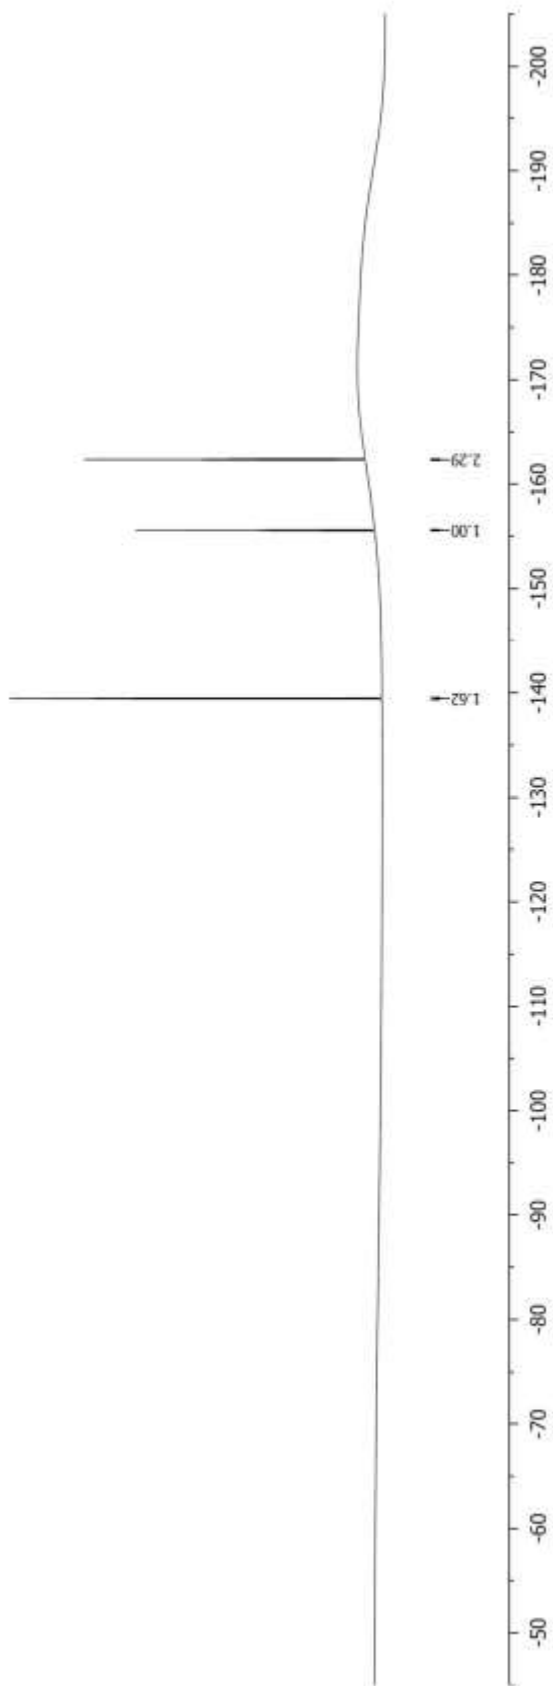

10.475  
 8.765  
 8.750  
 8.747  
 8.359  
 8.118  
 8.116  
 8.102  
 8.099  
 8.000  
 7.885  
 7.873  
 7.570  
 7.567  
 7.557  
 7.542  
 7.534  
 7.531  
 7.518  
 7.515  
 7.444  
 7.428  
 7.413  
 7.382  
 7.374  
 7.366  
 7.357  
 7.260  
 4.726  
 4.702  
 4.649  
 4.625  
 3.397  
 3.369  
 3.308  
 3.279  
 1.096  
 1.081  
 1.066  
 0.000

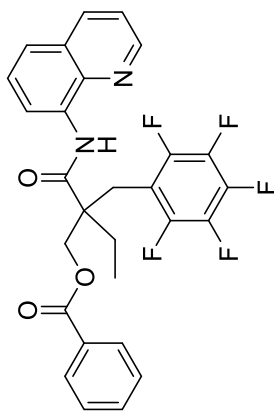

**3r**

<sup>1</sup>H NMR (500 MHz, CDCl<sub>3</sub>)

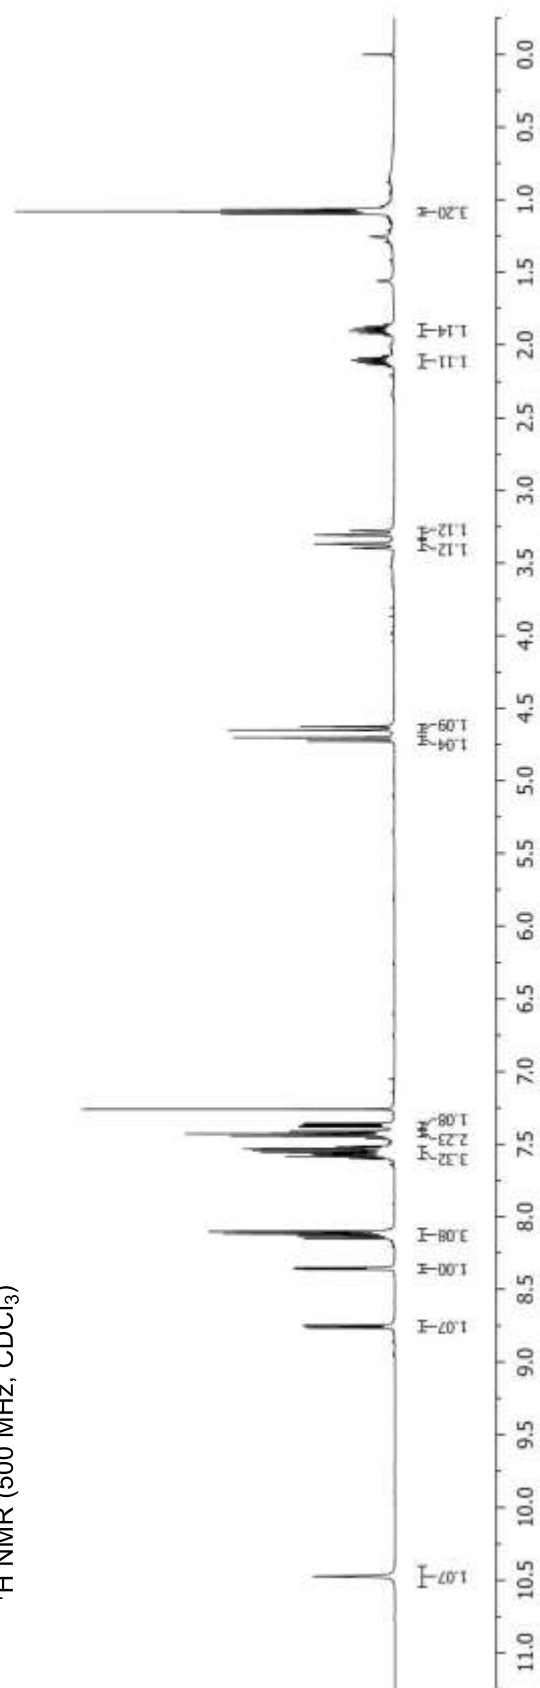

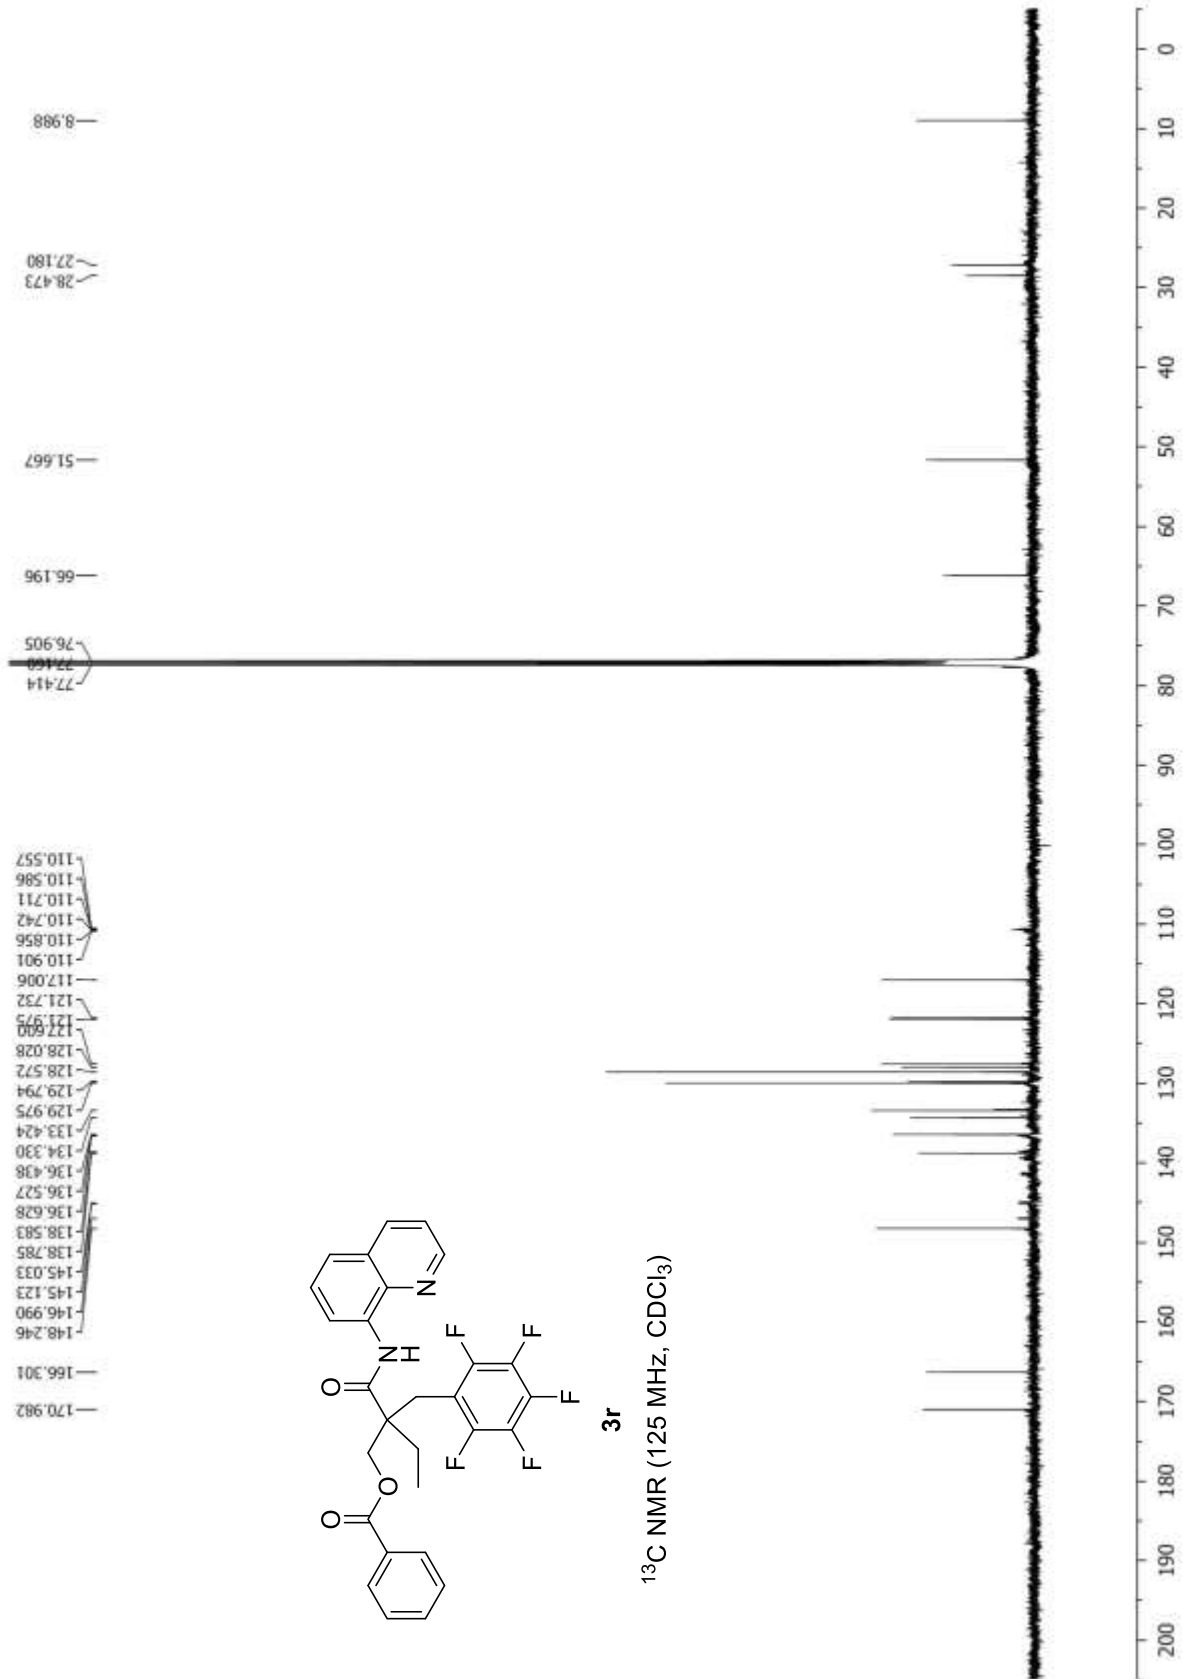

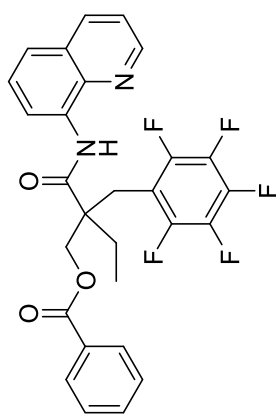

**3r**

<sup>19</sup>F NMR (471 MHz, CDCl<sub>3</sub>)

155.565  
155.609  
155.654  
162.246  
162.263  
162.294  
162.308  
162.338  
162.355

139.378  
139.394  
139.425  
139.442

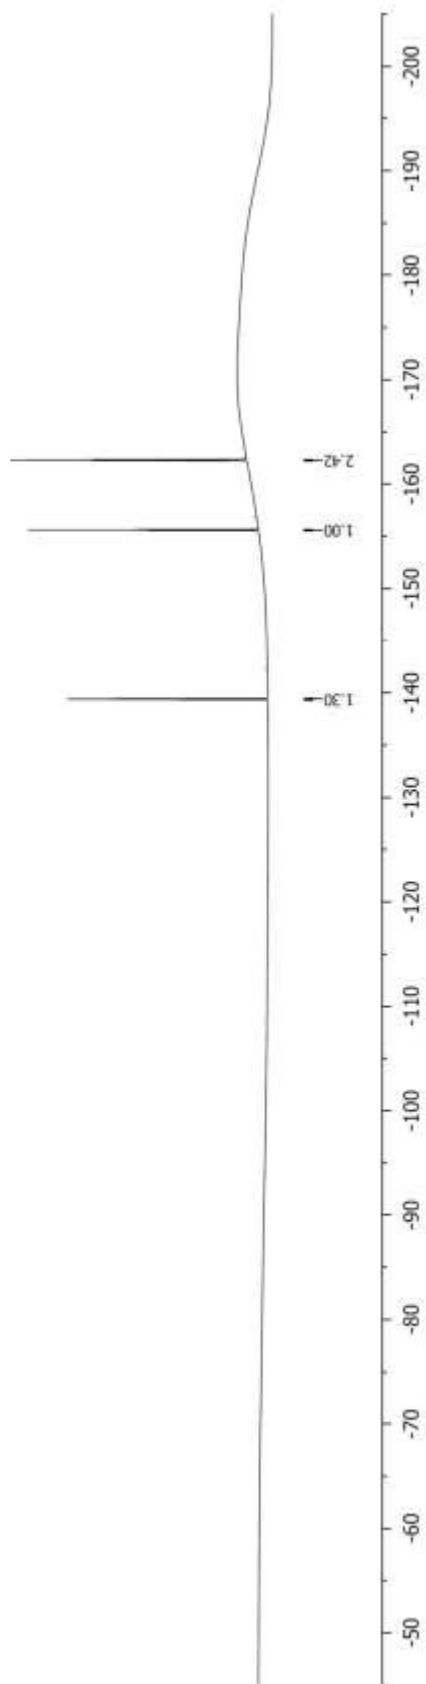

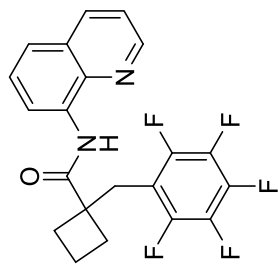

**3s**

<sup>1</sup>H NMR (500 MHz, CDCl<sub>3</sub>)

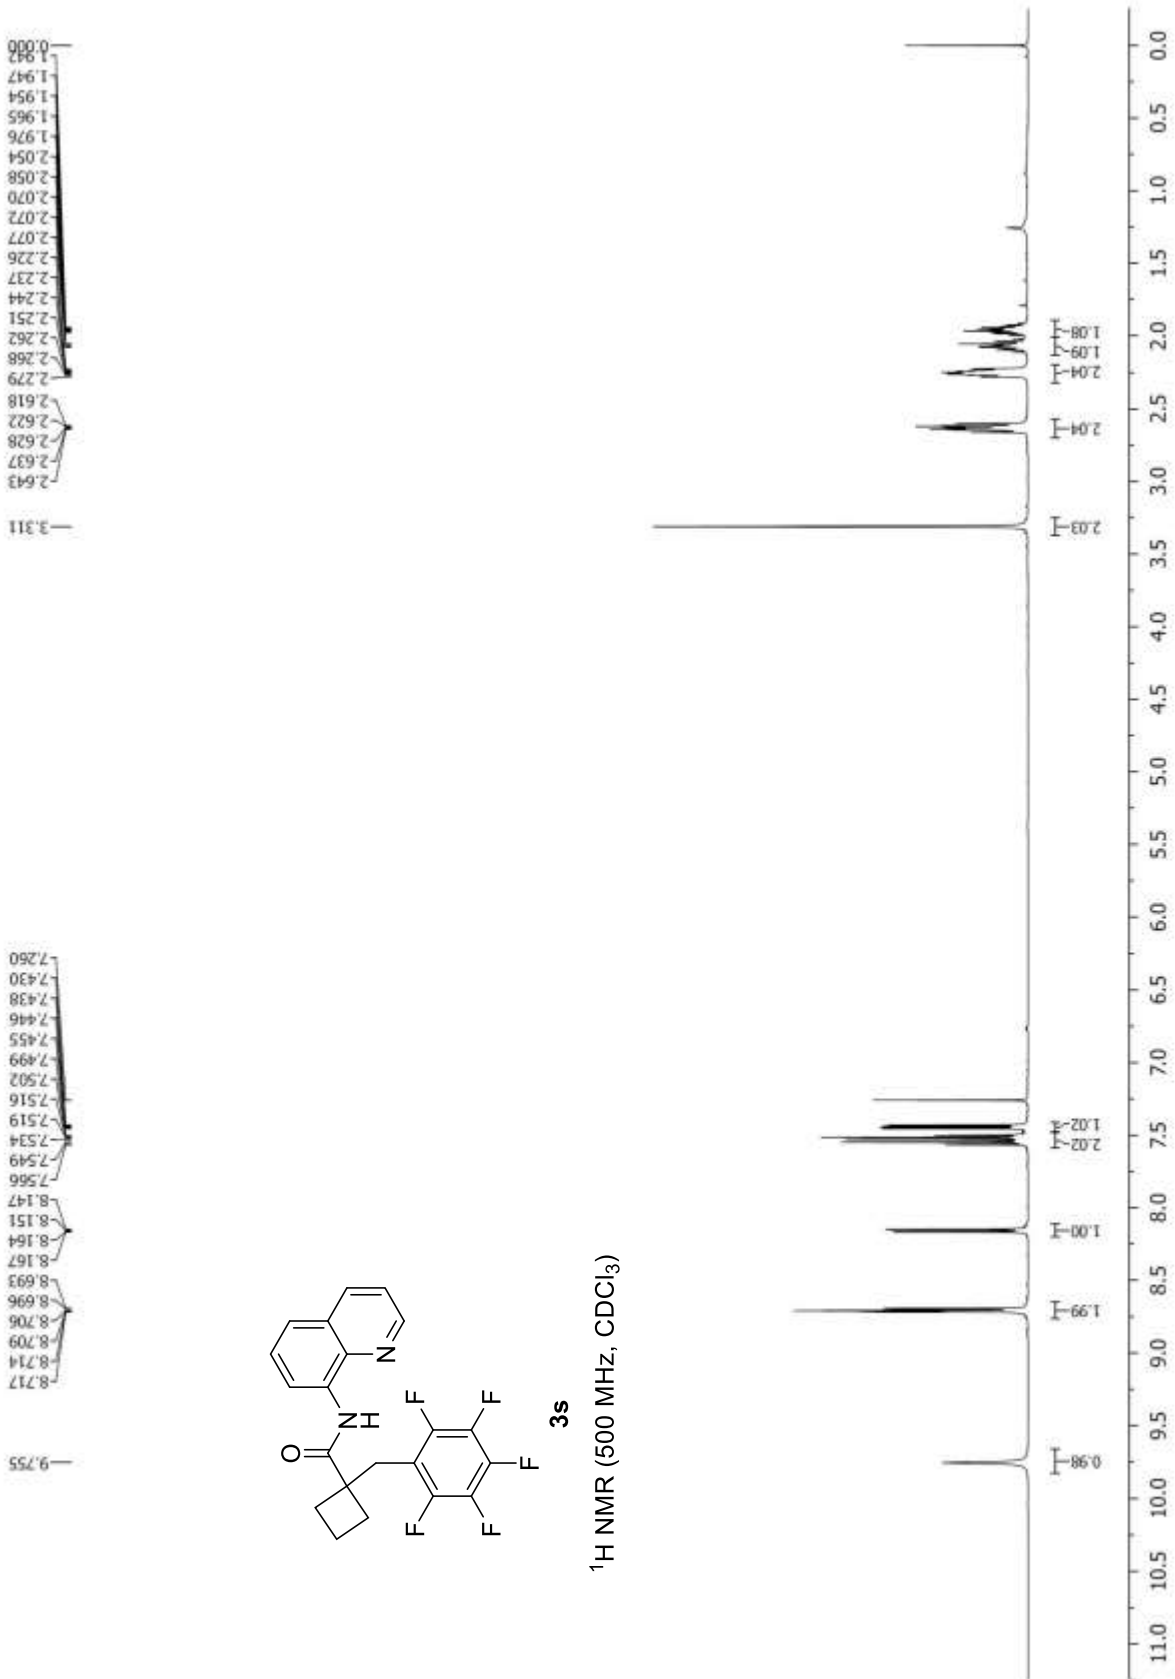



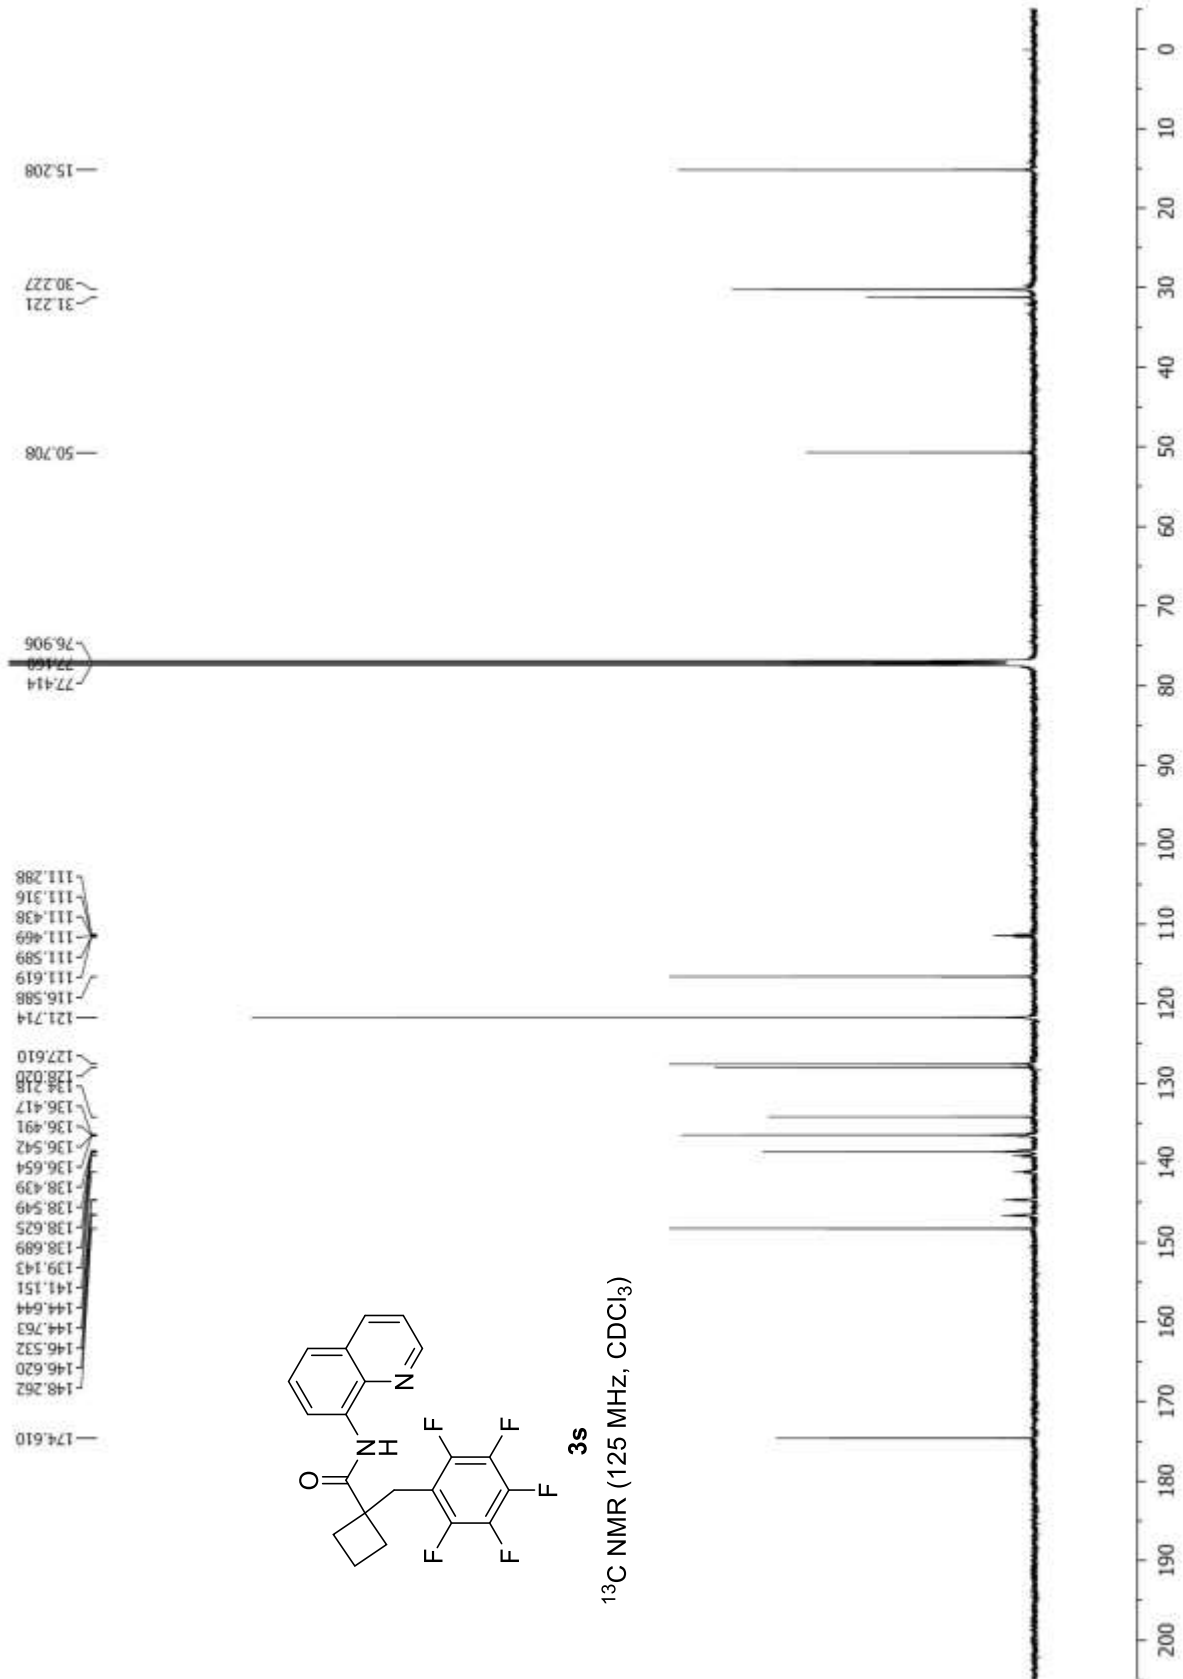

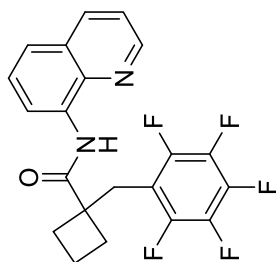

**3s**

<sup>19</sup>F NMR (471 MHz, CDCl<sub>3</sub>)

162.617  
162.600  
162.569  
162.555  
162.524  
162.508  
156.389  
156.345  
156.300

140.940  
140.923  
140.892  
140.875

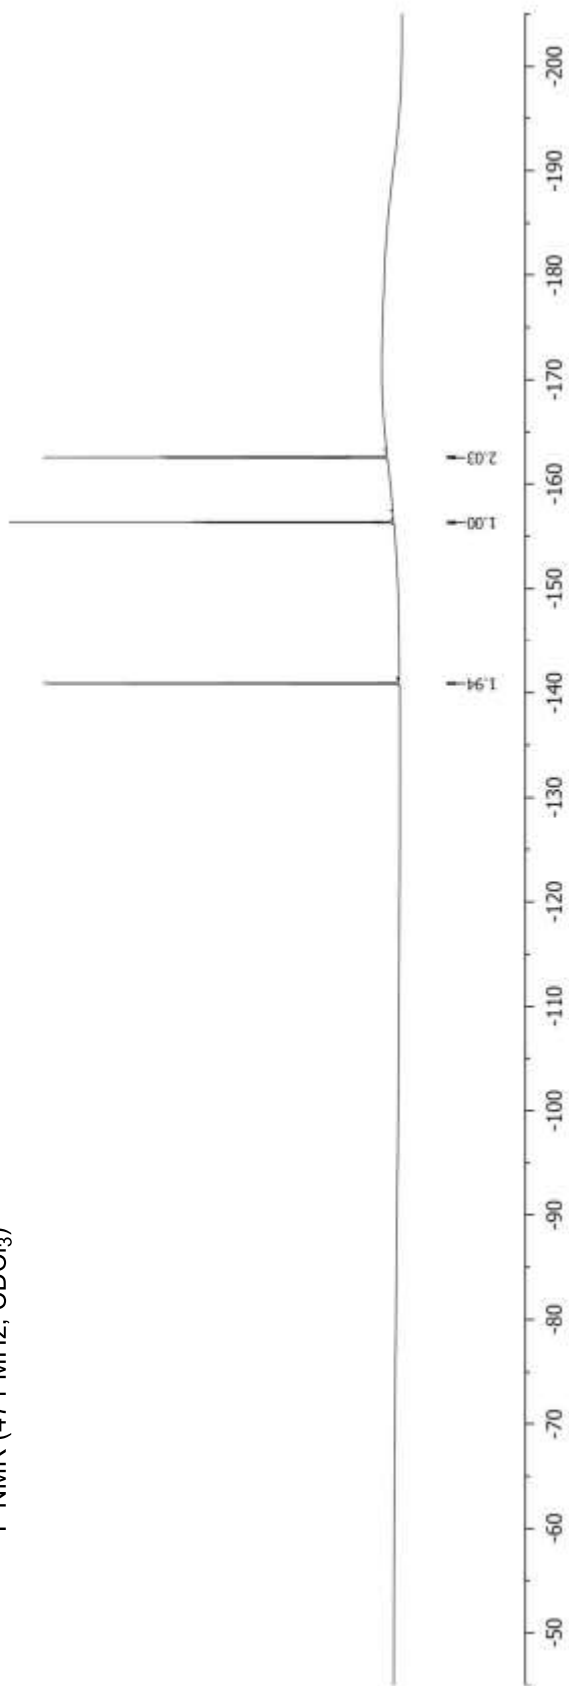

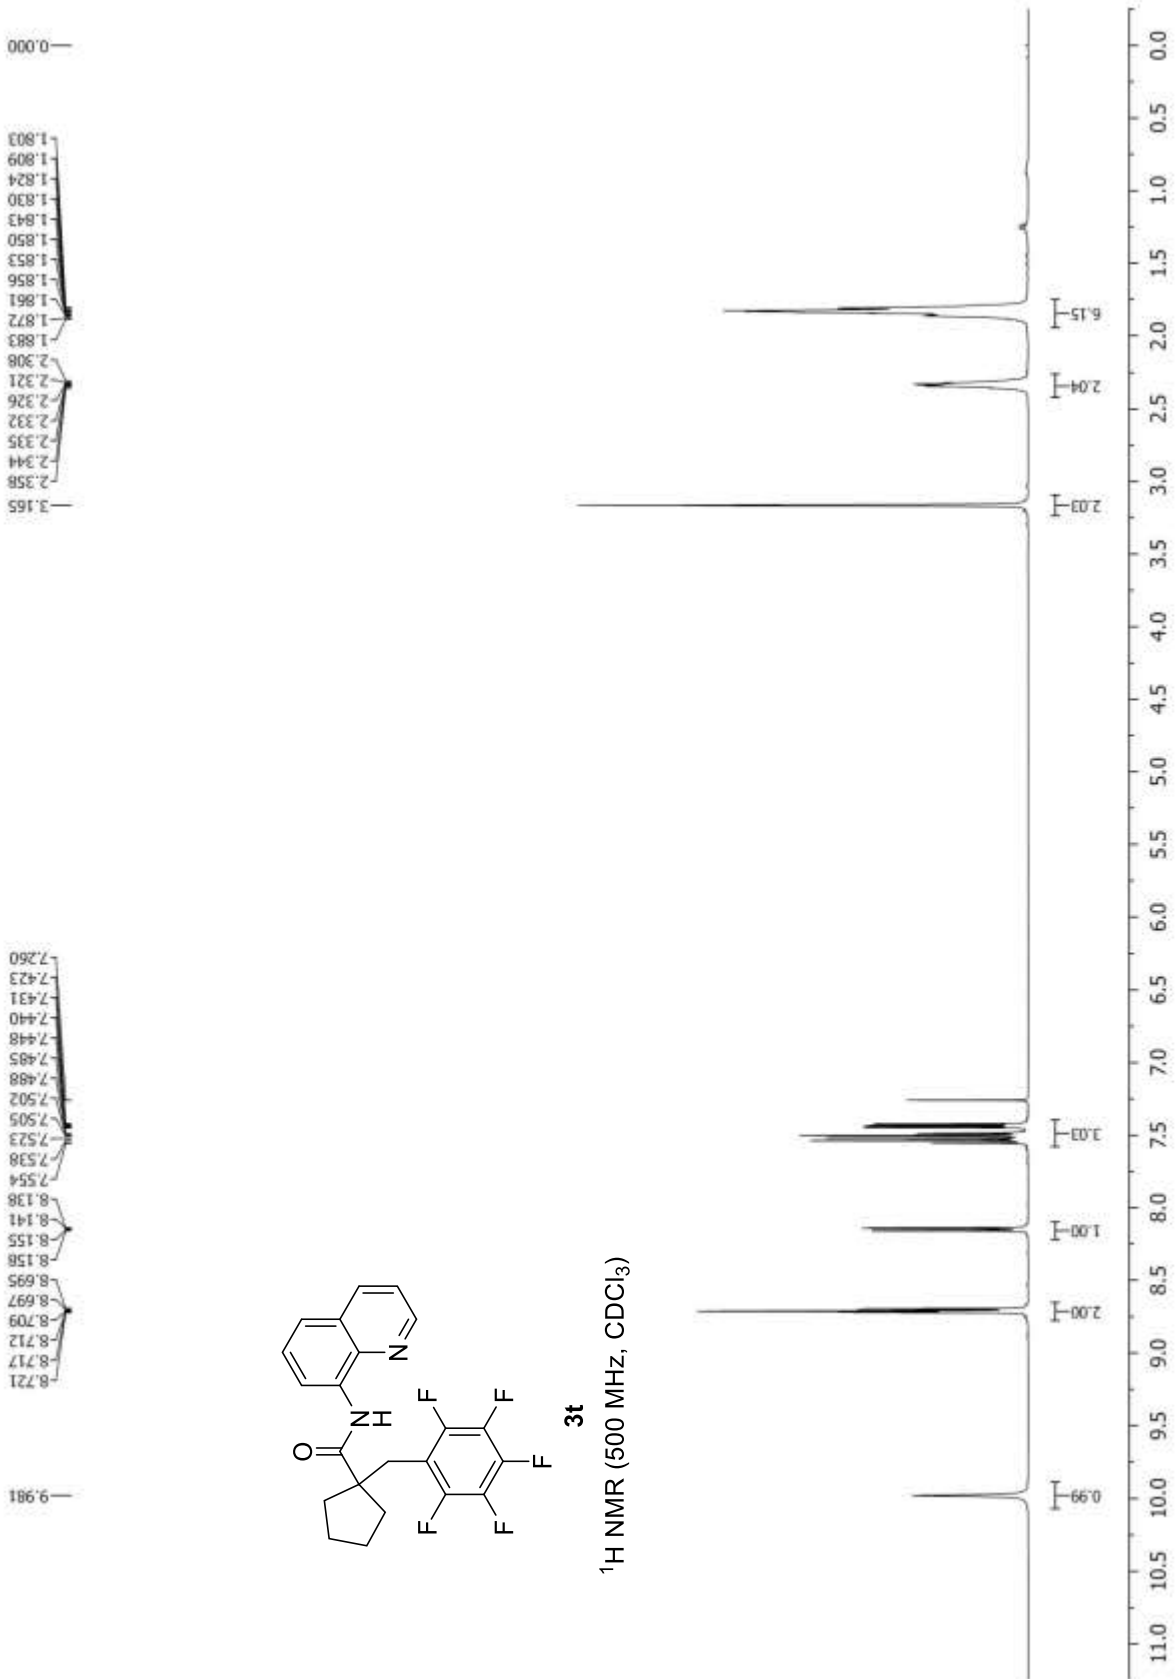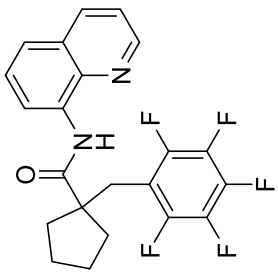

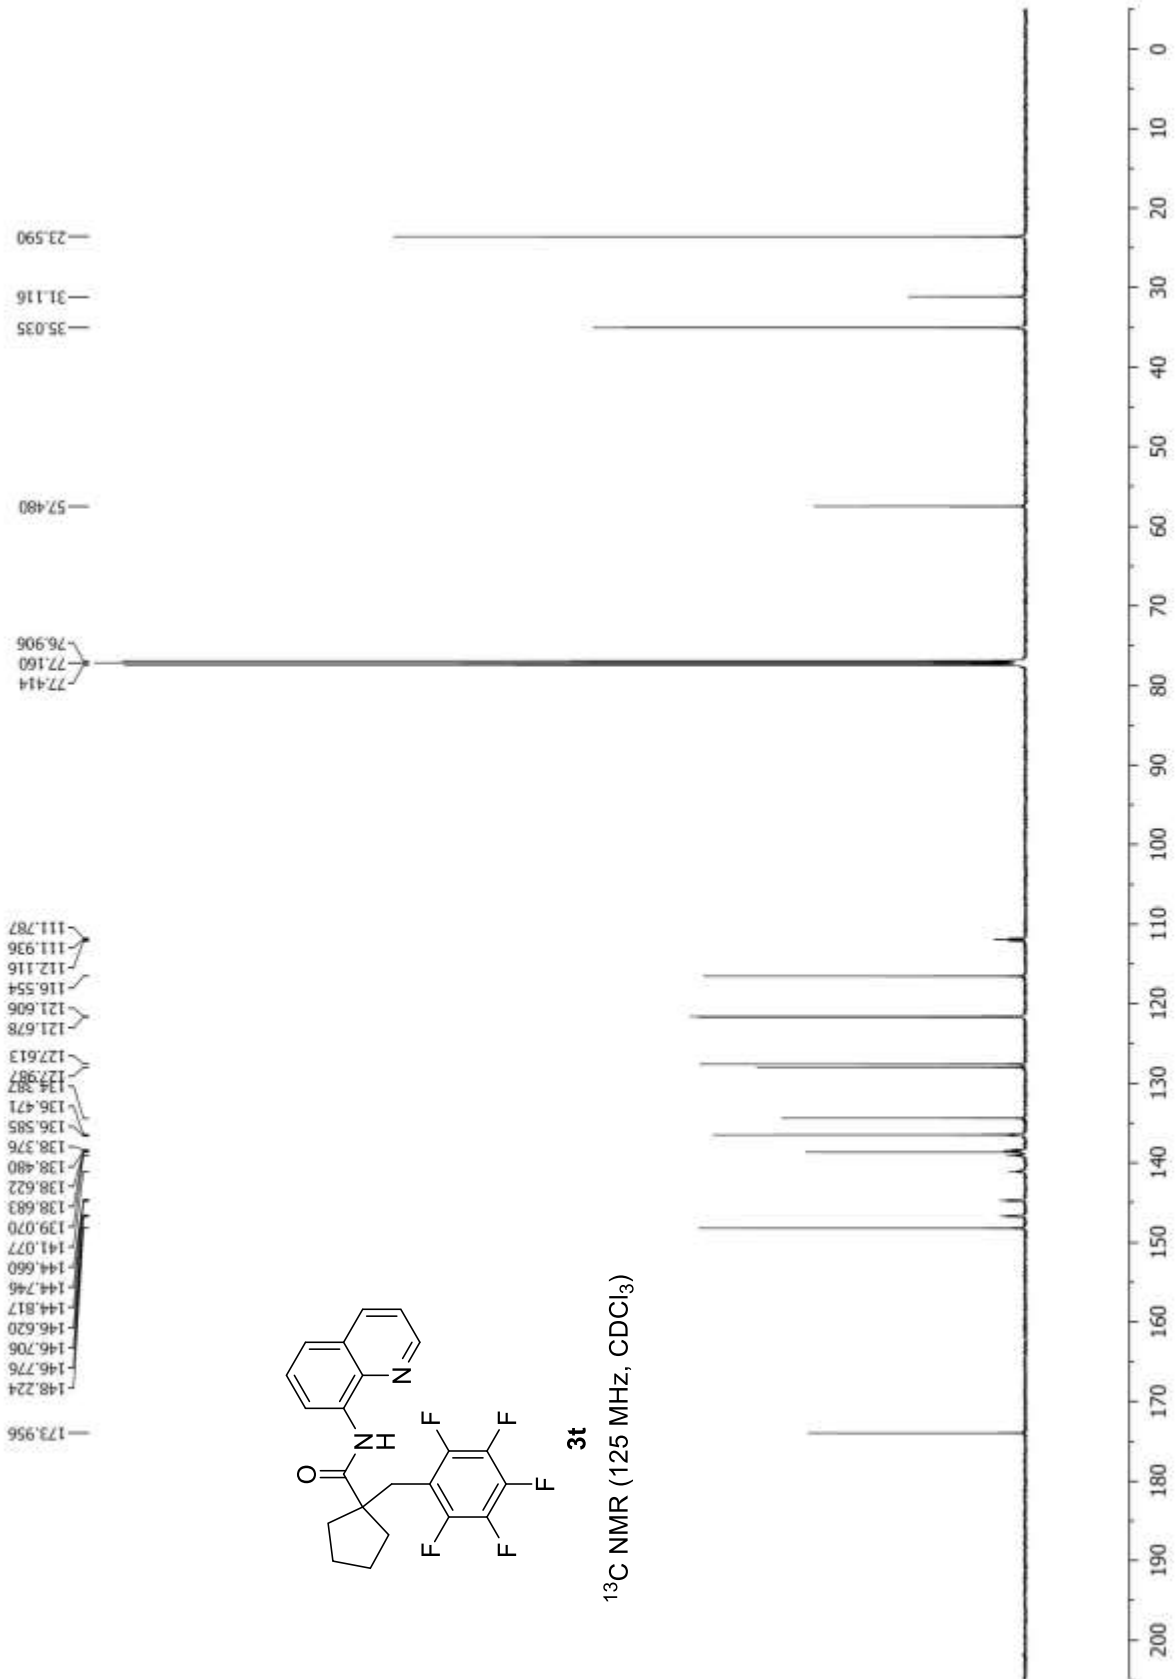

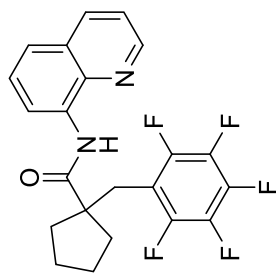

**3t**

<sup>19</sup>F NMR (471 MHz, CDCl<sub>3</sub>)

140.382  
140.398  
140.430  
140.447  
156.501  
156.546  
156.590  
162.799  
162.815  
162.846  
162.860  
162.891  
162.908

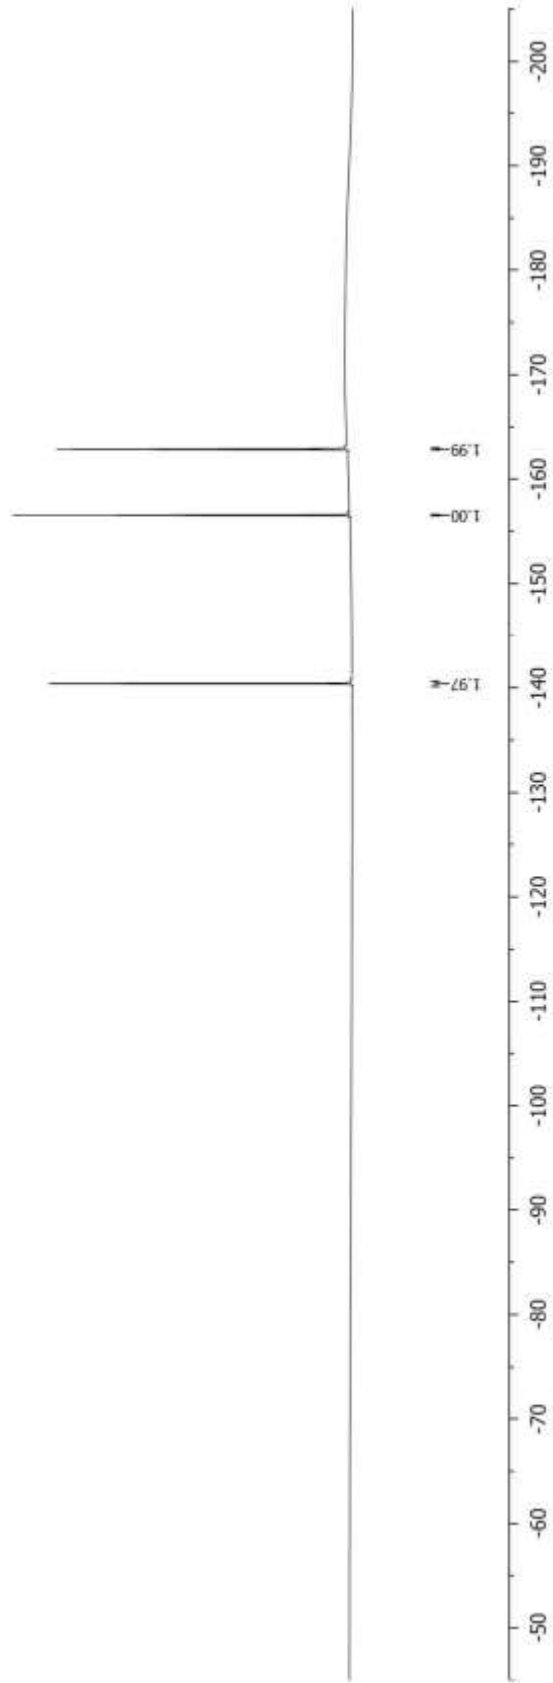

10.122  
 8.746  
 8.743  
 8.730  
 8.727  
 8.722  
 8.718  
 8.176  
 8.172  
 8.159  
 8.156  
 7.572  
 7.556  
 7.541  
 7.532  
 7.527  
 7.523  
 7.520  
 7.506  
 7.503  
 7.460  
 7.452  
 7.444  
 7.435  
 7.260  
 2.994  
 2.384  
 1.778  
 1.768  
 1.758  
 1.751  
 1.684  
 1.672  
 1.650  
 1.527  
 1.507  
 1.487  
 1.318  
 1.312  
 1.305  
 1.296  
 1.289  
 0.001

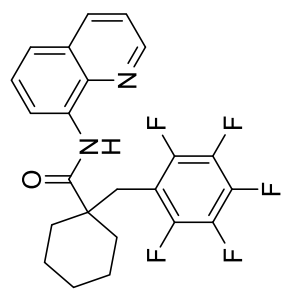

**3u**

<sup>1</sup>H NMR (500 MHz, CDCl<sub>3</sub>)

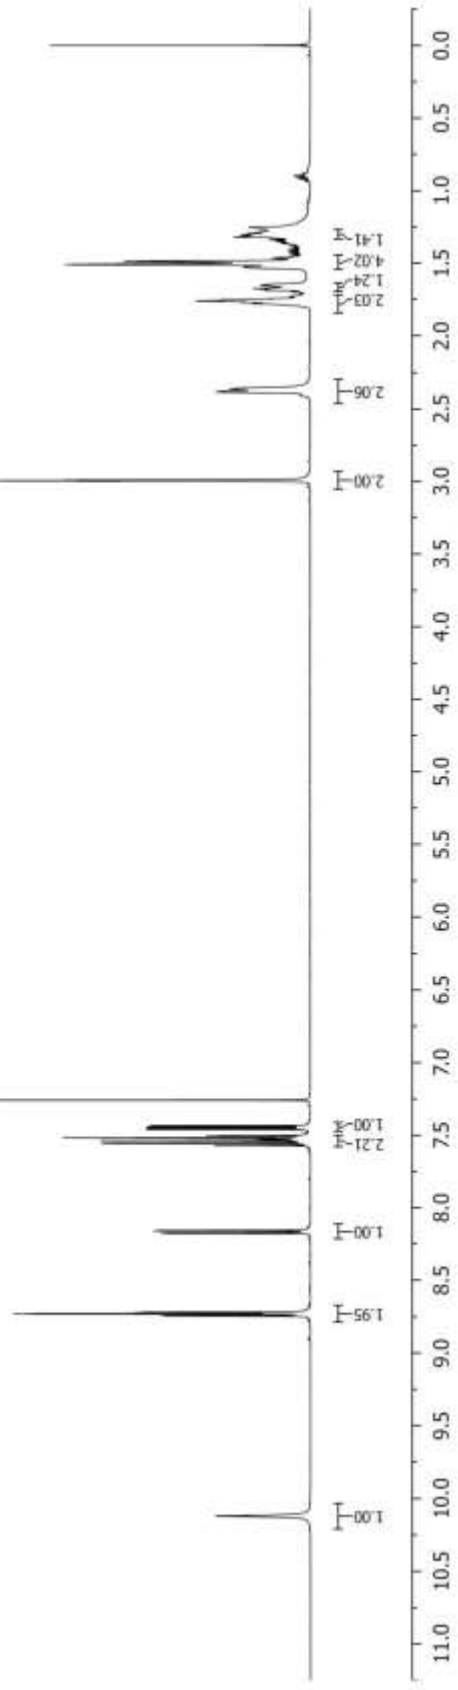

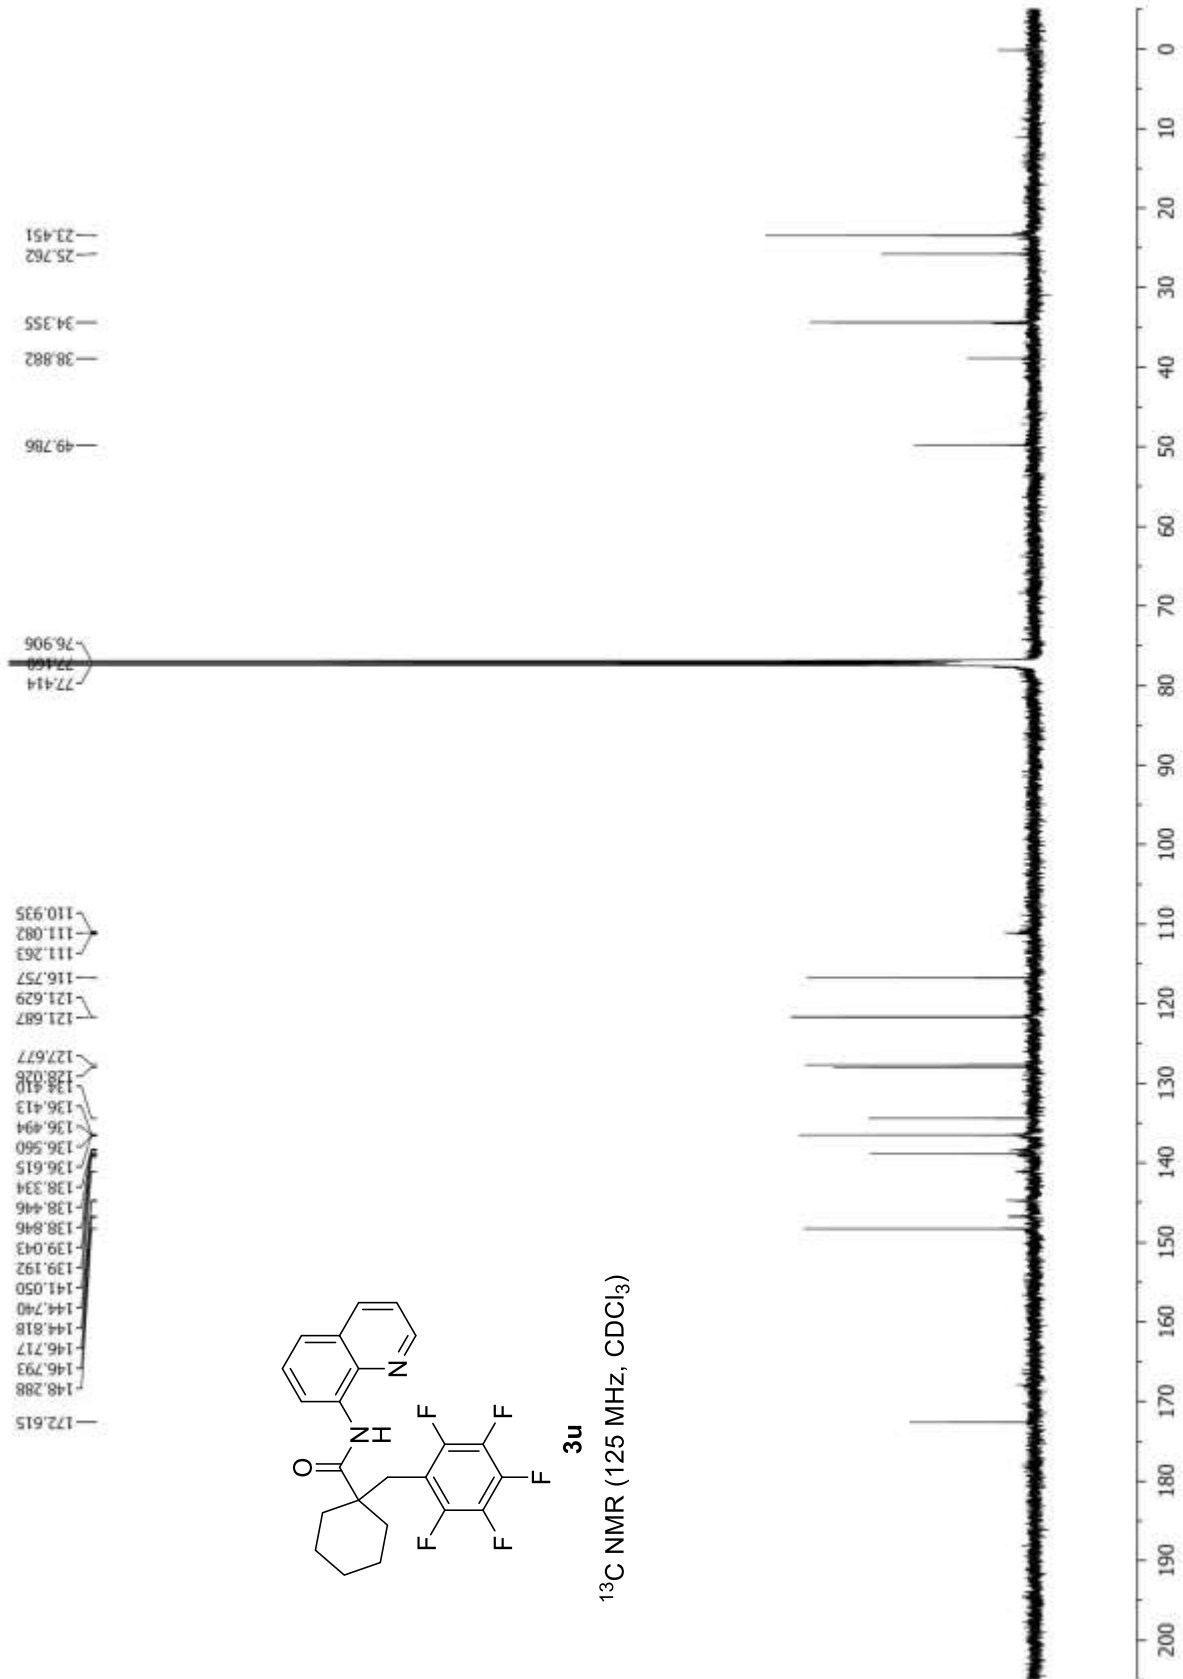

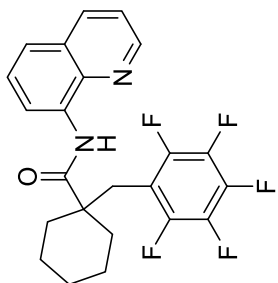

**3u**

$^{19}\text{F}$  NMR (471 MHz,  $\text{CDCl}_3$ )

156.557  
156.601  
156.645  
163.083  
163.100  
163.131  
163.145  
163.176  
163.193

139.522  
139.539  
139.570  
139.587

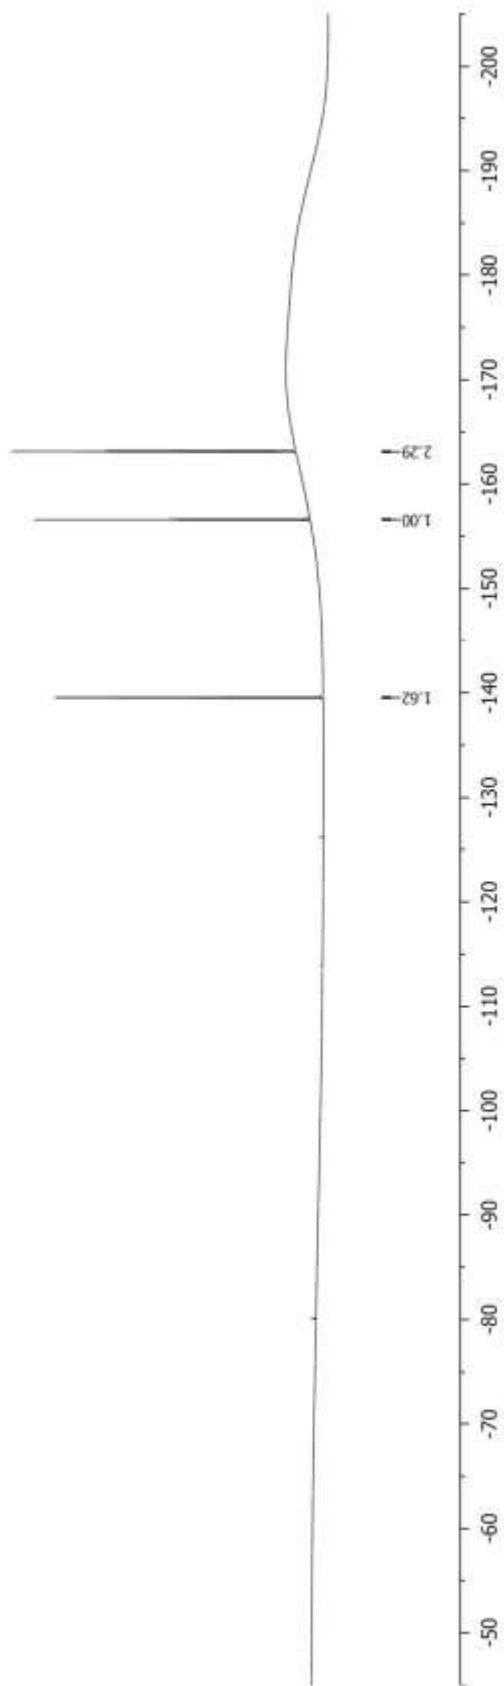



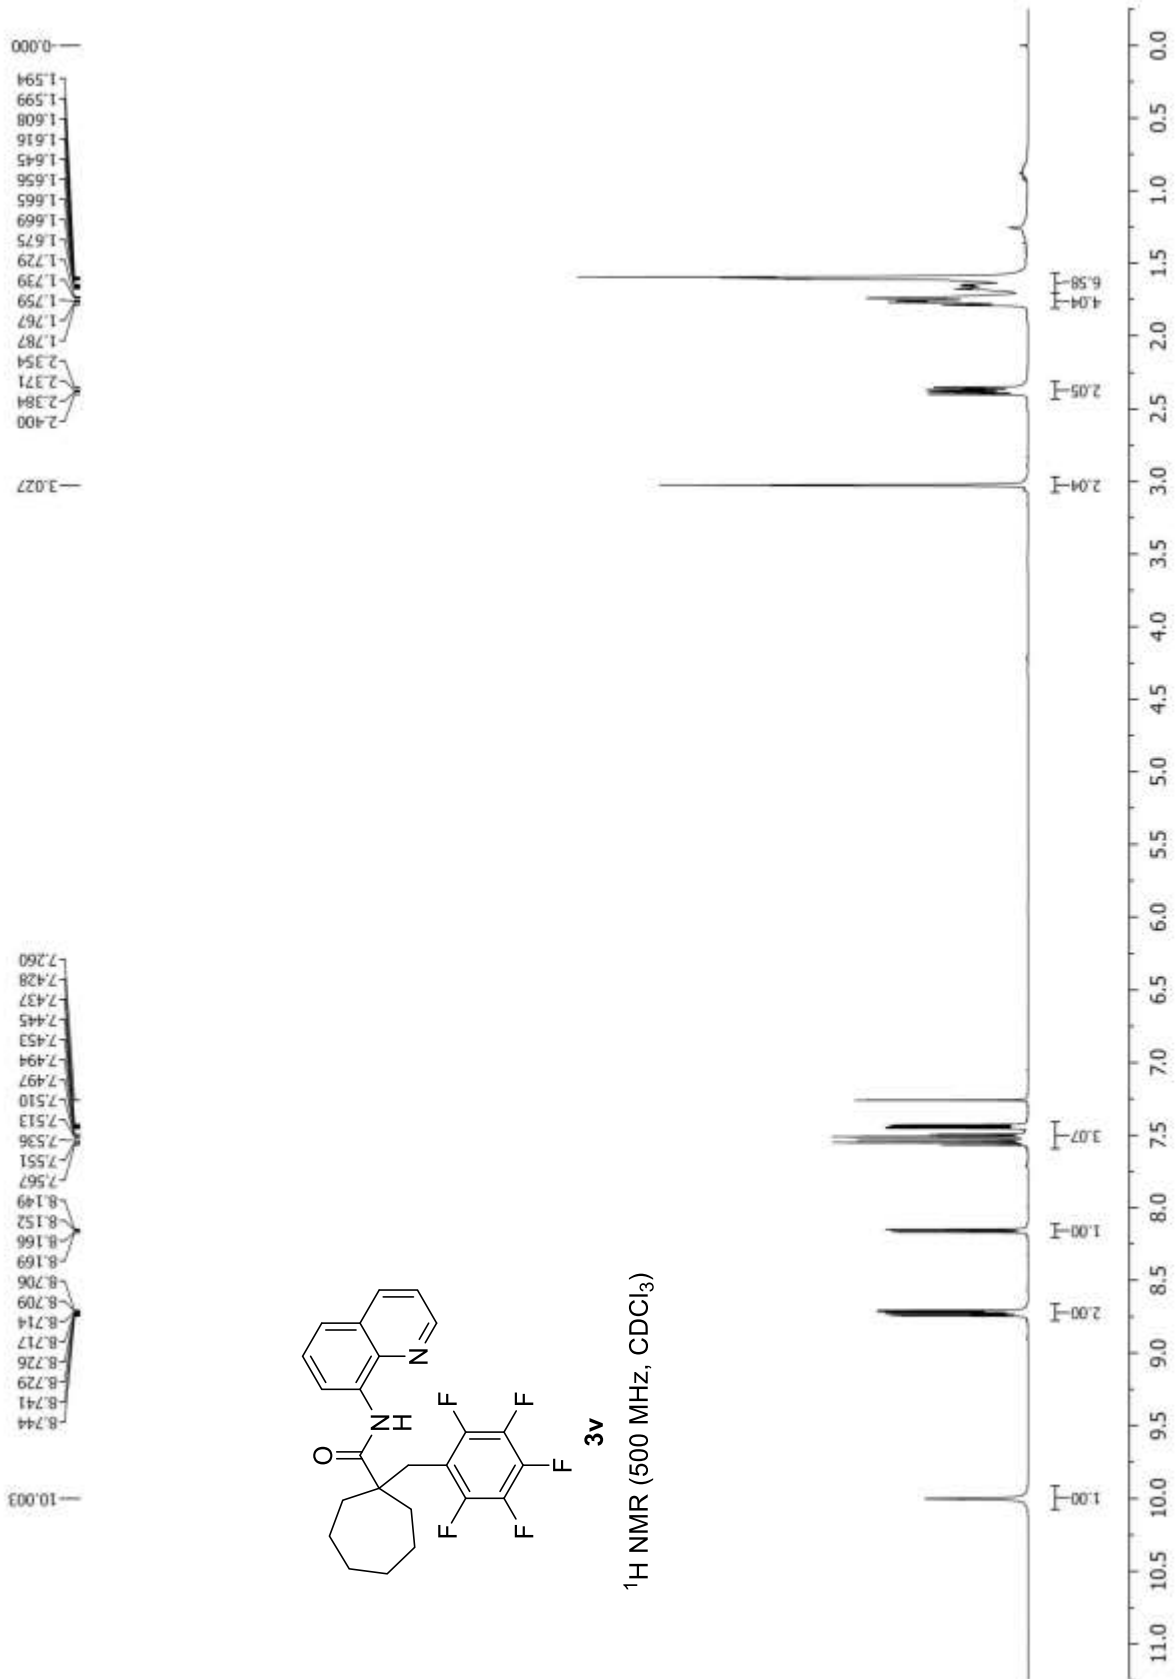

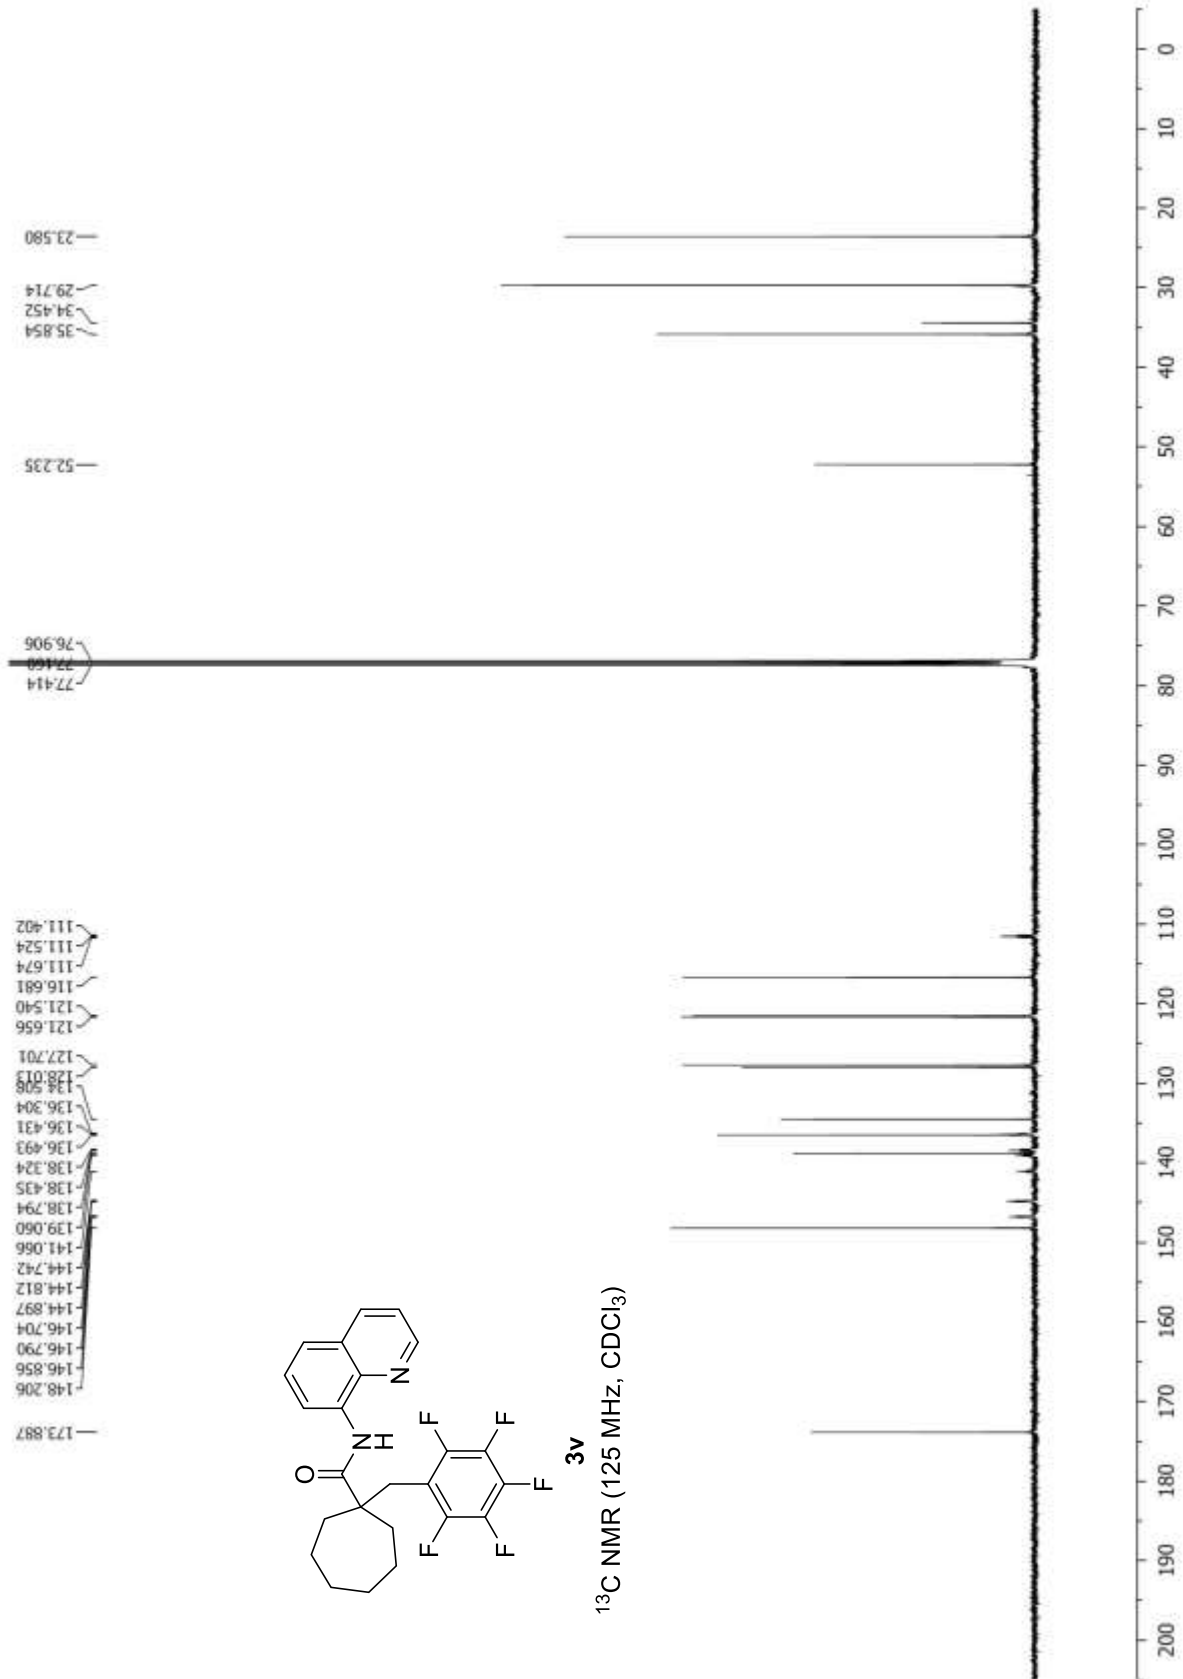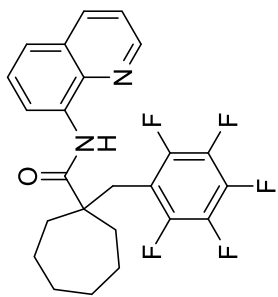

3v  
<sup>13</sup>C NMR (125 MHz, CDCl<sub>3</sub>)

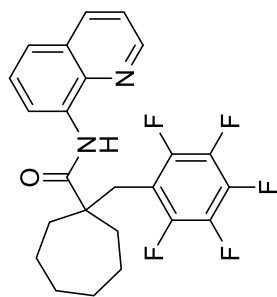

**3v**

<sup>19</sup>F NMR (471 MHz, CDCl<sub>3</sub>)

163.130  
163.112  
163.081  
163.067  
163.036  
163.019  
156.601  
156.557  
156.512

139.760  
139.744  
139.712  
139.695

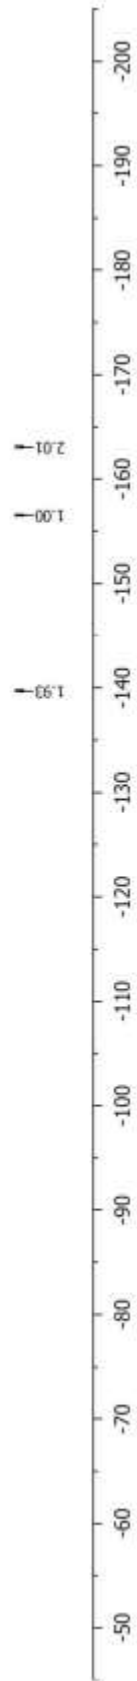



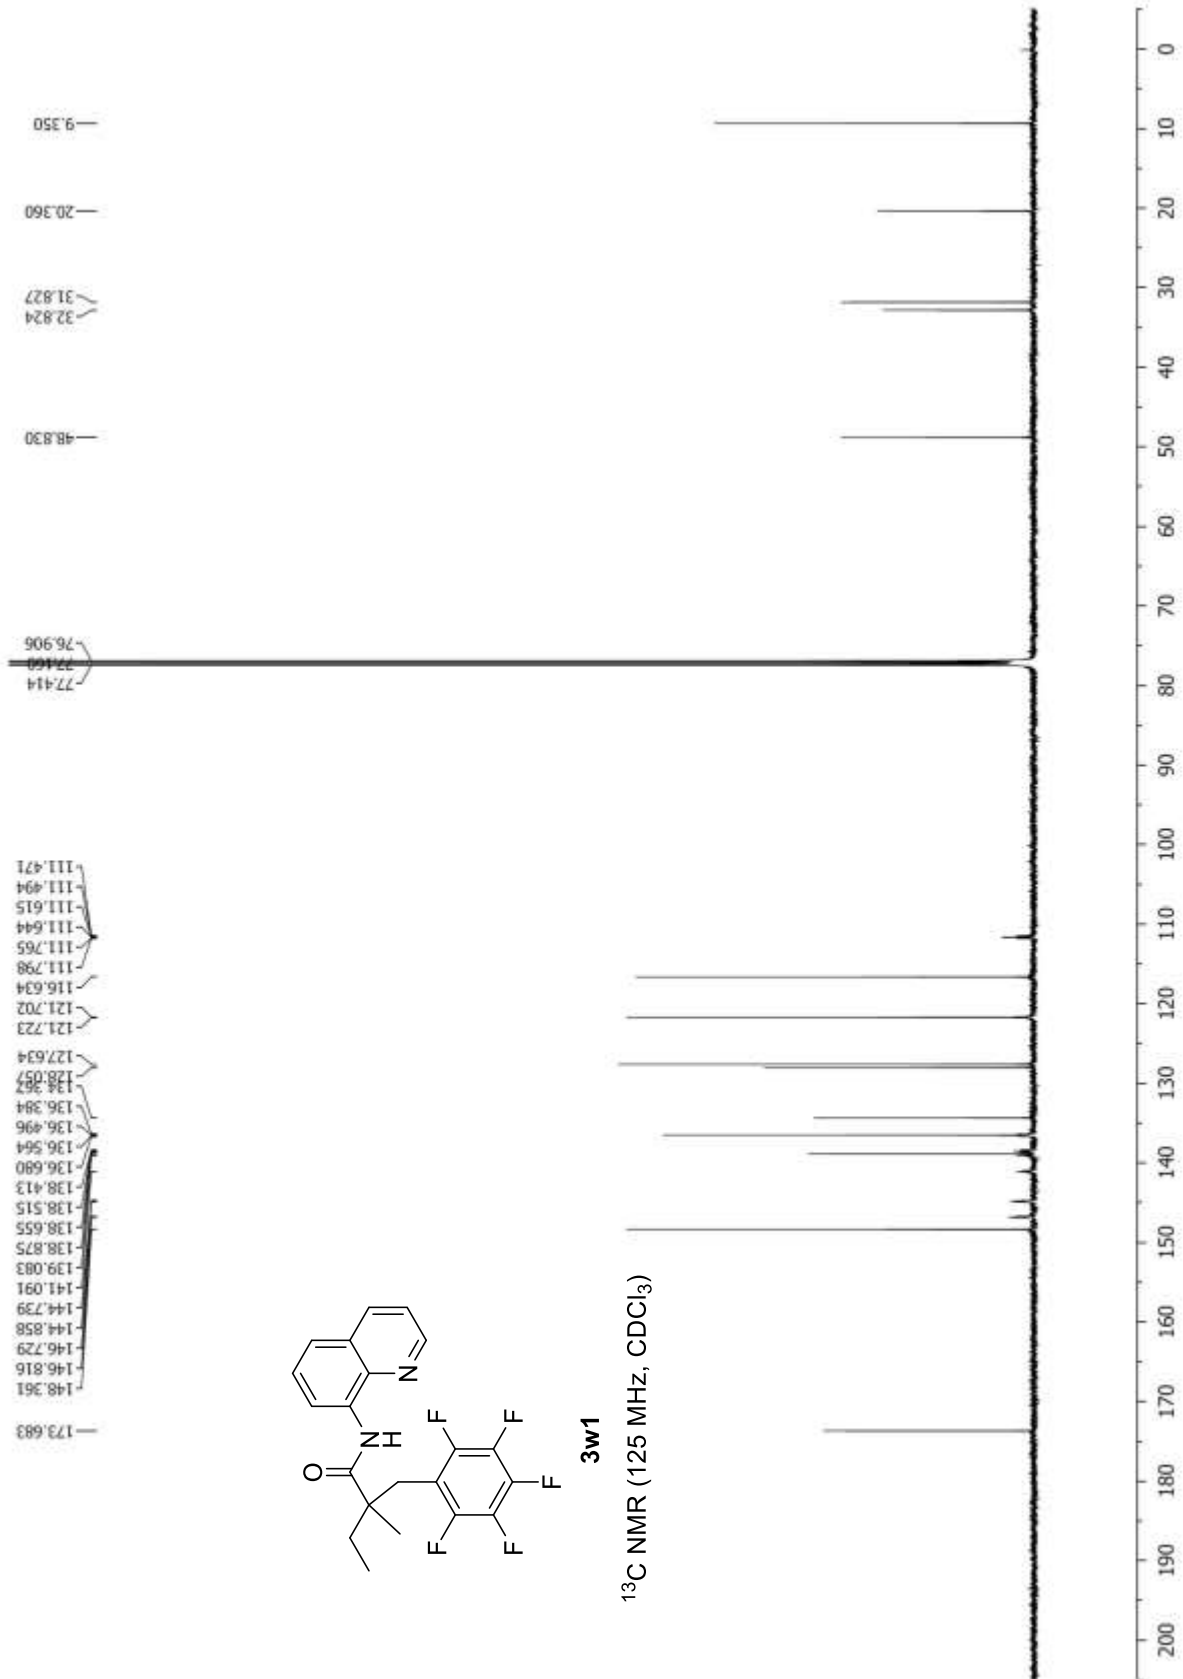

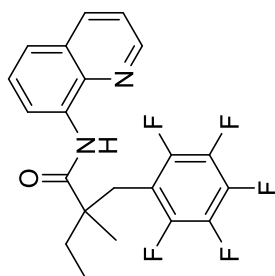

3w1

<sup>19</sup>F NMR (471 MHz, CDCl<sub>3</sub>)

156.317  
156.361  
156.405  
162.730  
162.745  
162.776  
162.792  
162.820  
162.838

139.242  
139.258  
139.290  
139.306

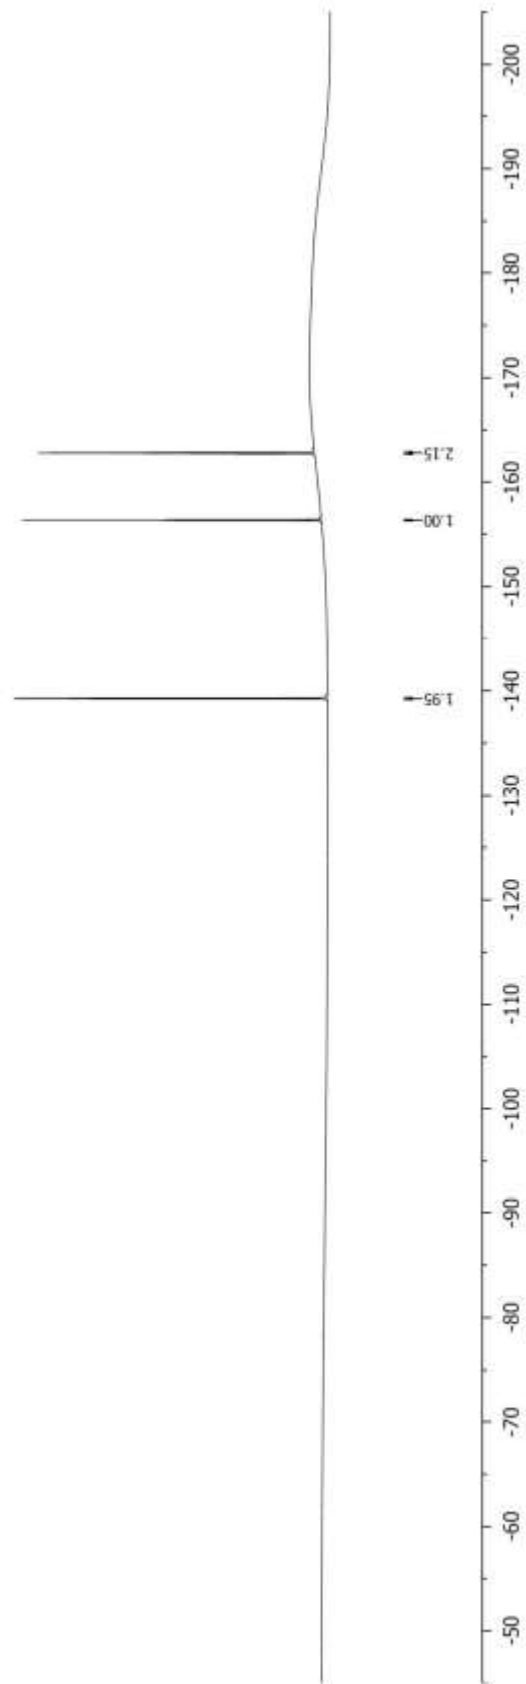

1.145  
 1.160  
 1.174  
 1.755  
 1.770  
 1.784  
 1.799  
 3.179  
 3.208  
 3.268  
 3.296

7.260  
 7.416  
 7.424  
 7.433  
 7.441  
 7.512  
 7.515  
 7.529  
 7.532  
 7.550  
 7.565  
 7.581  
 8.147  
 8.150  
 8.164  
 8.525  
 8.529  
 8.534  
 8.537  
 8.724  
 8.726  
 8.738  
 8.741  
 9.582

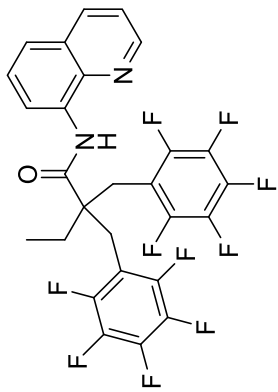

**3w2**

<sup>1</sup>H NMR (500 MHz, CDCl<sub>3</sub>)

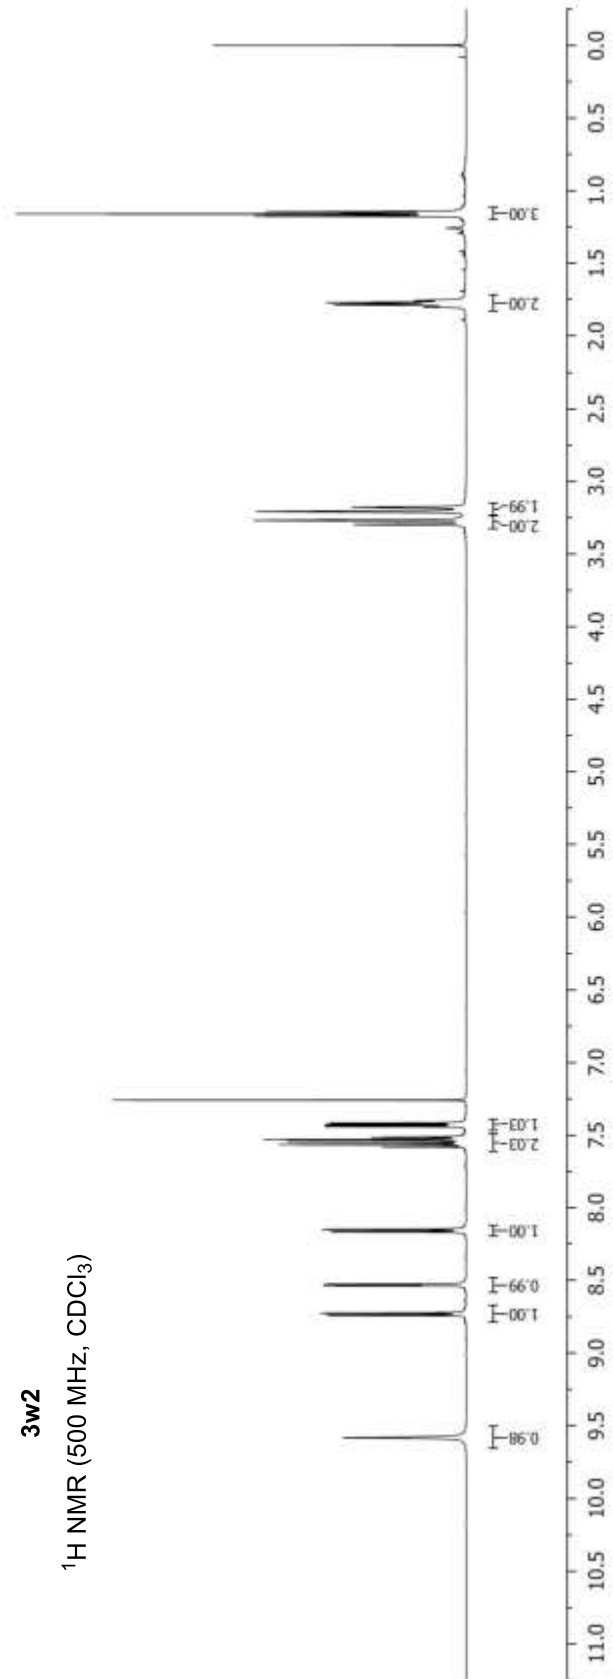

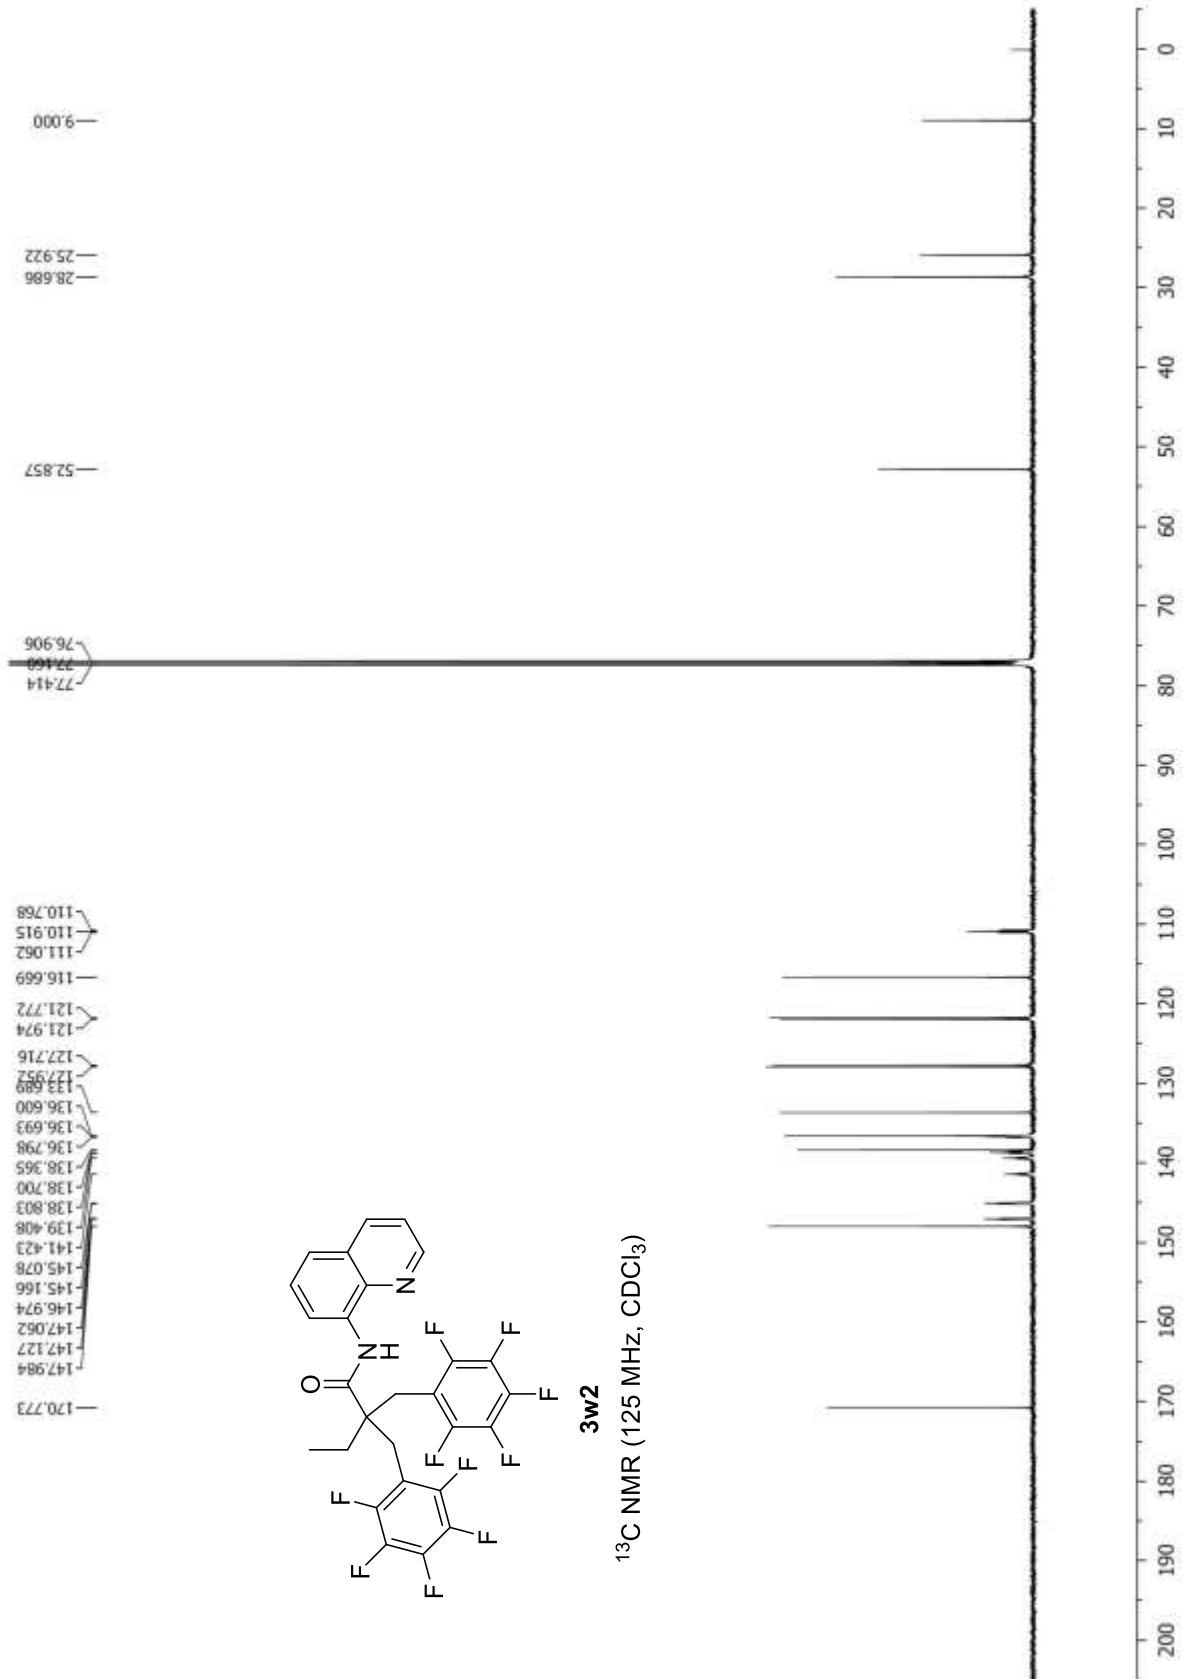



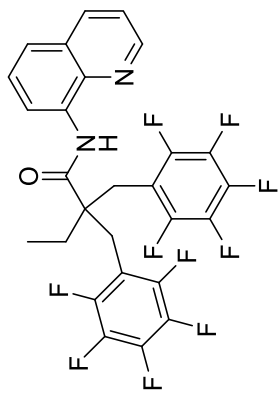

**3w2**

$^{19}\text{F}$  NMR (471 MHz,  $\text{CDCl}_3$ )

155.382  
155.426  
155.470  
162.314  
162.329  
162.360  
162.374  
162.405  
162.421

138.303  
138.318  
138.350  
138.366

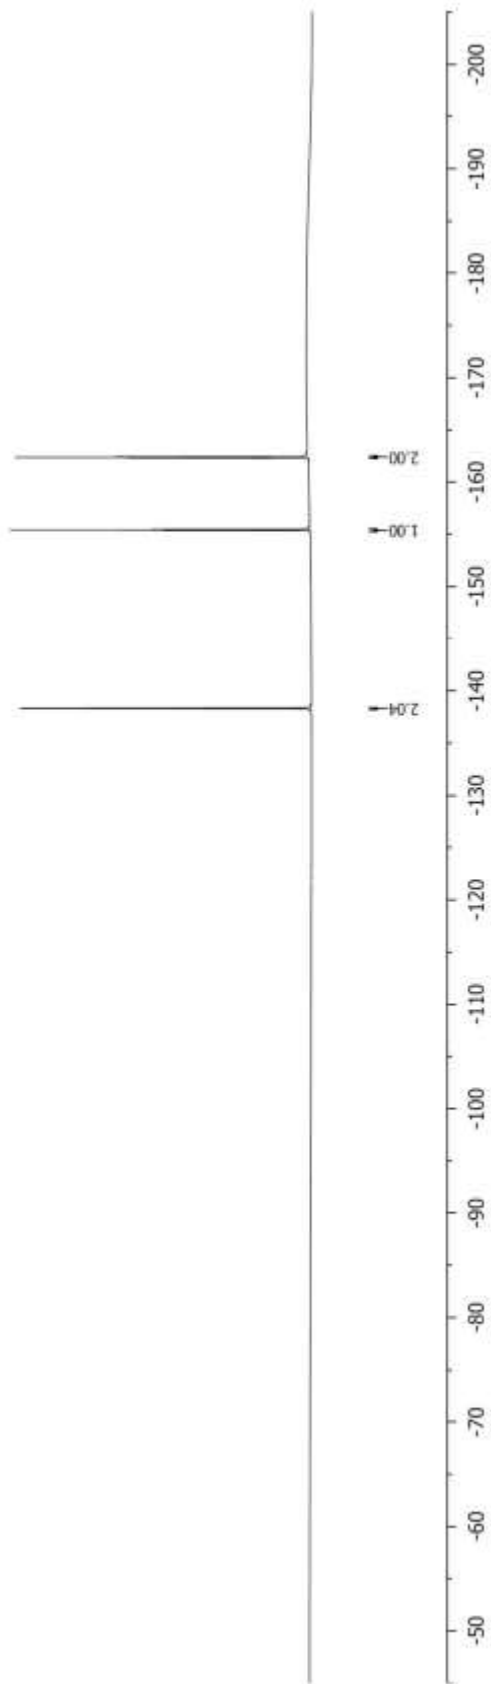

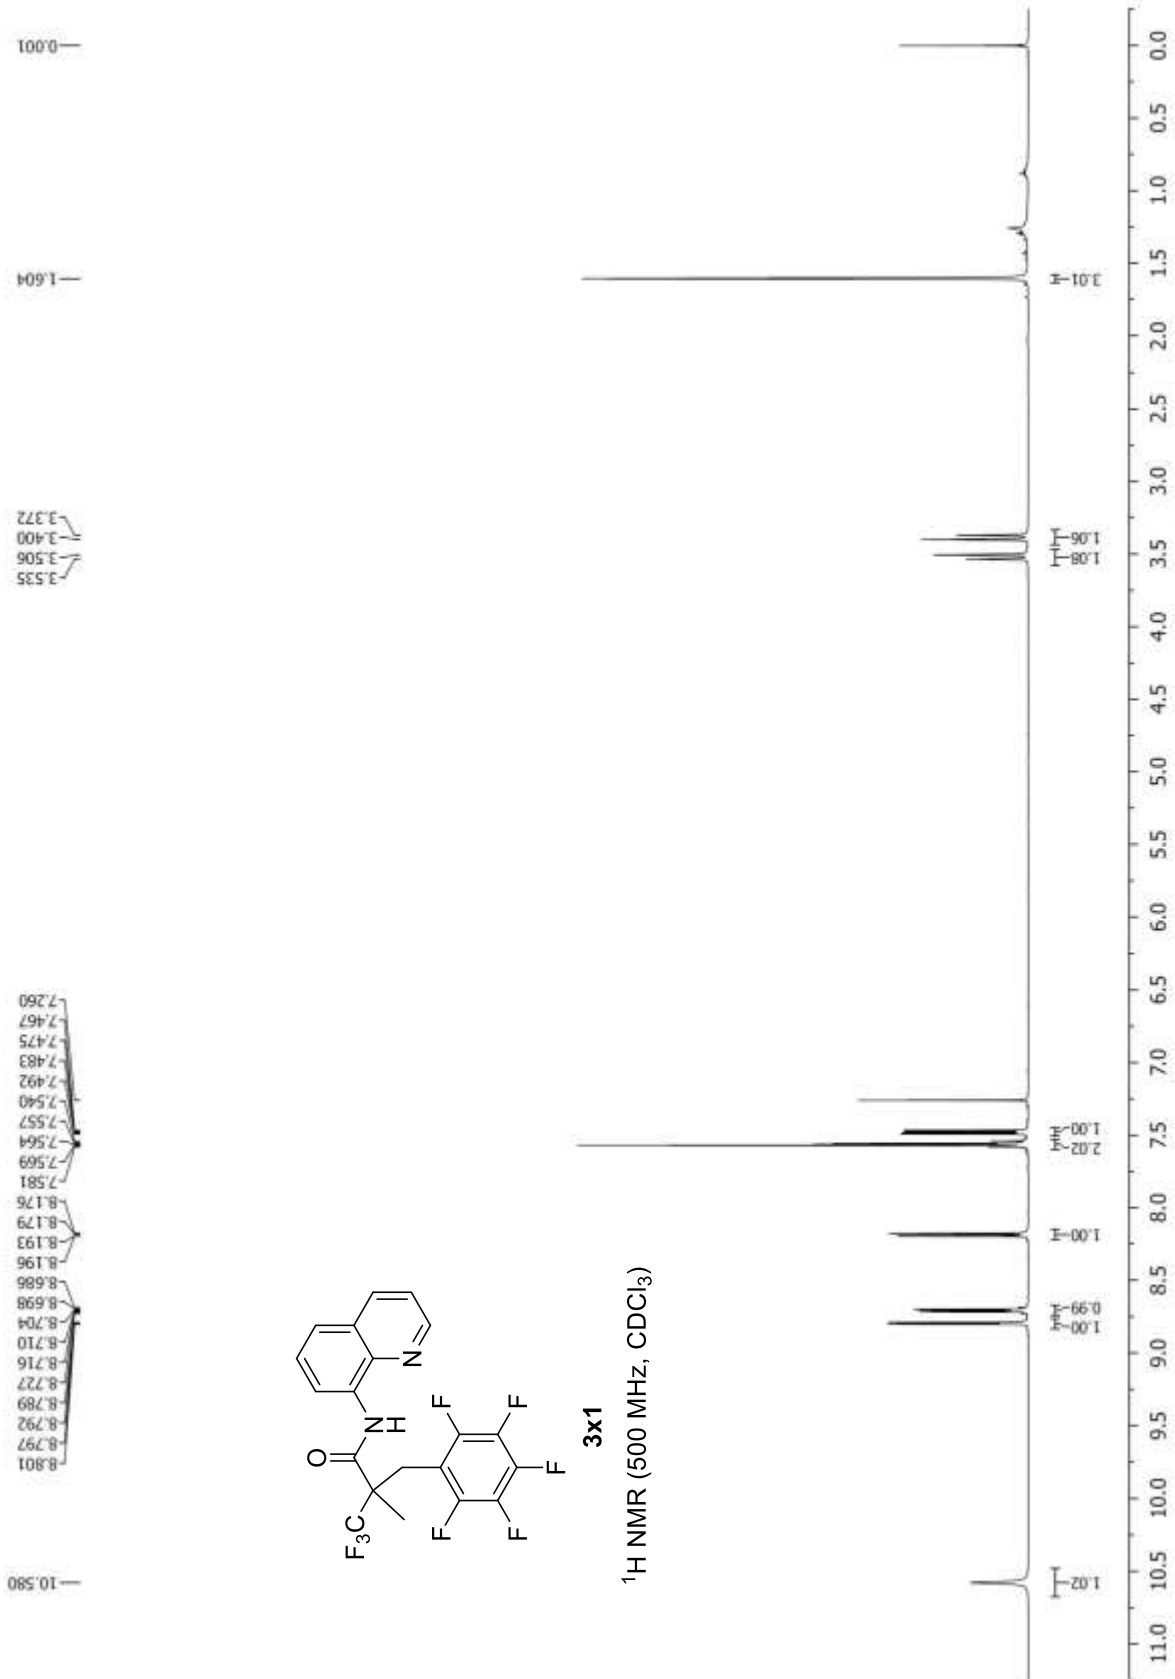

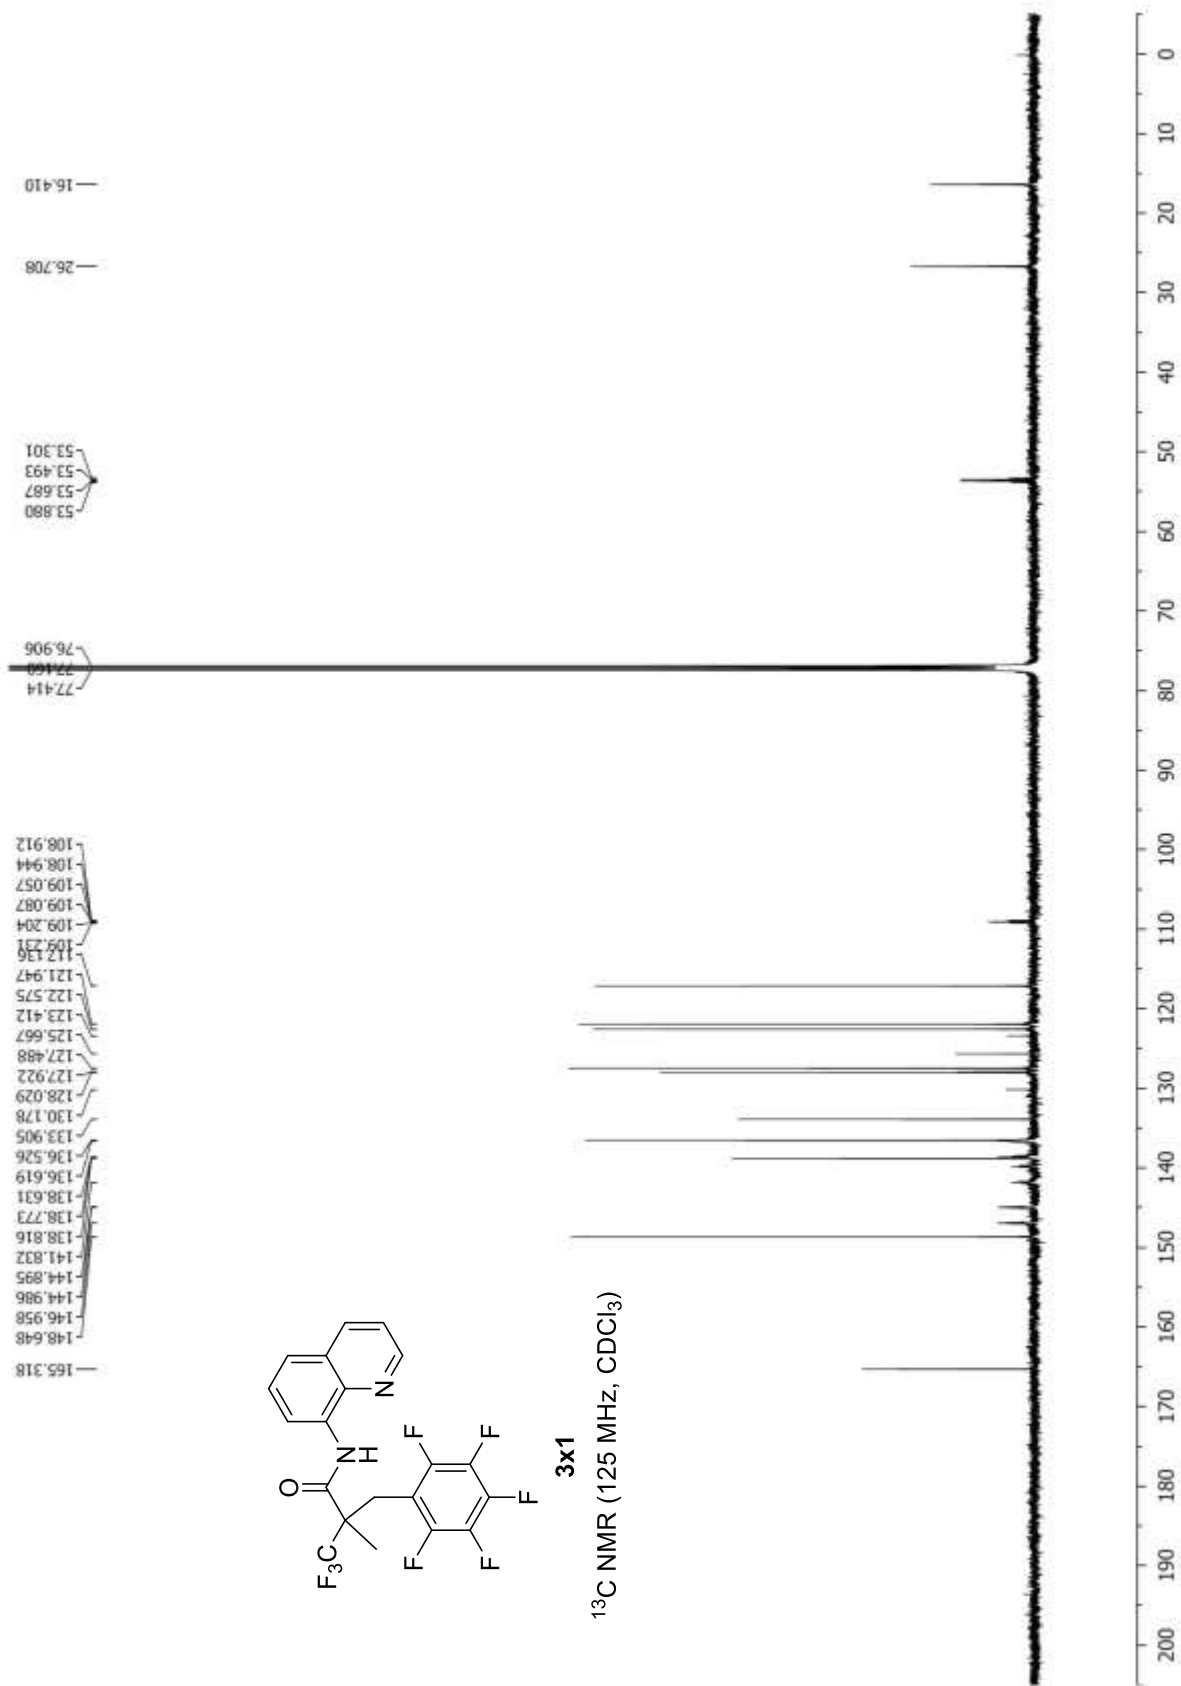

154.320  
154.365  
154.409  
161.841  
161.855  
161.885  
161.900  
161.929  
161.947

139.030  
139.065

71.869

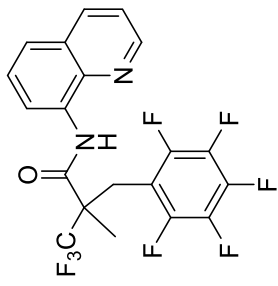

3x1

<sup>19</sup>F NMR (471 MHz, CDCl<sub>3</sub>)

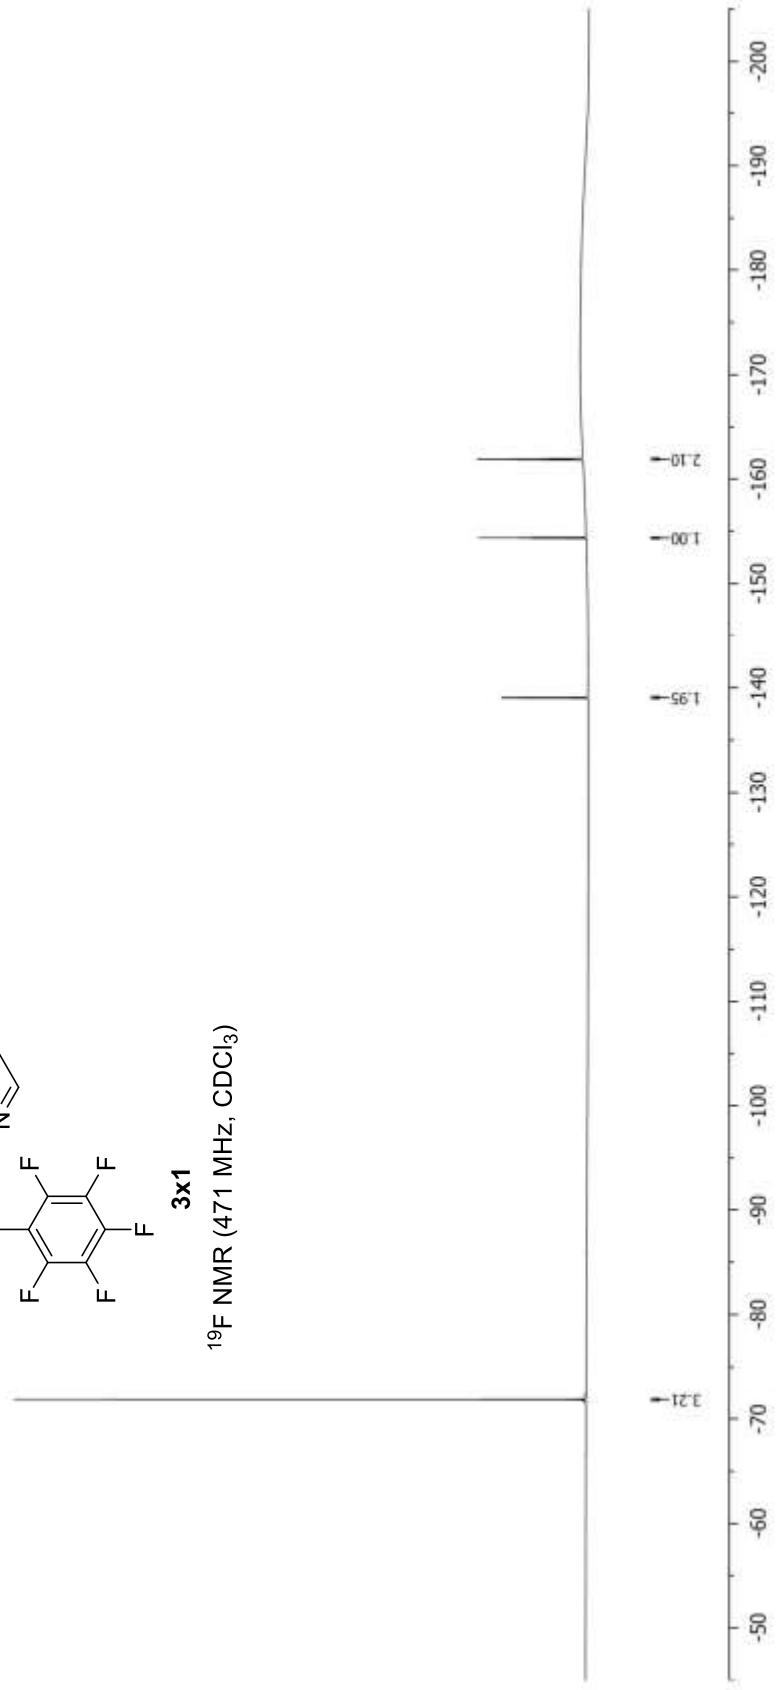

0.000

3.591  
3.526

8.222  
8.212  
8.205  
8.200  
8.194  
8.184  
8.168  
8.155  
8.157  
7.587  
7.580  
7.575  
7.559  
7.465  
7.456  
7.448  
7.440  
7.260

10.341

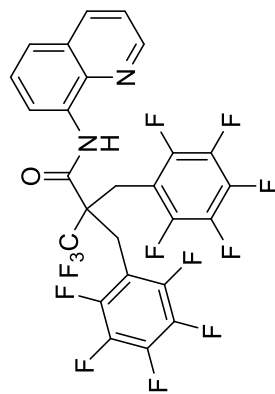

3x2

<sup>1</sup>H NMR (500 MHz, CDCl<sub>3</sub>)

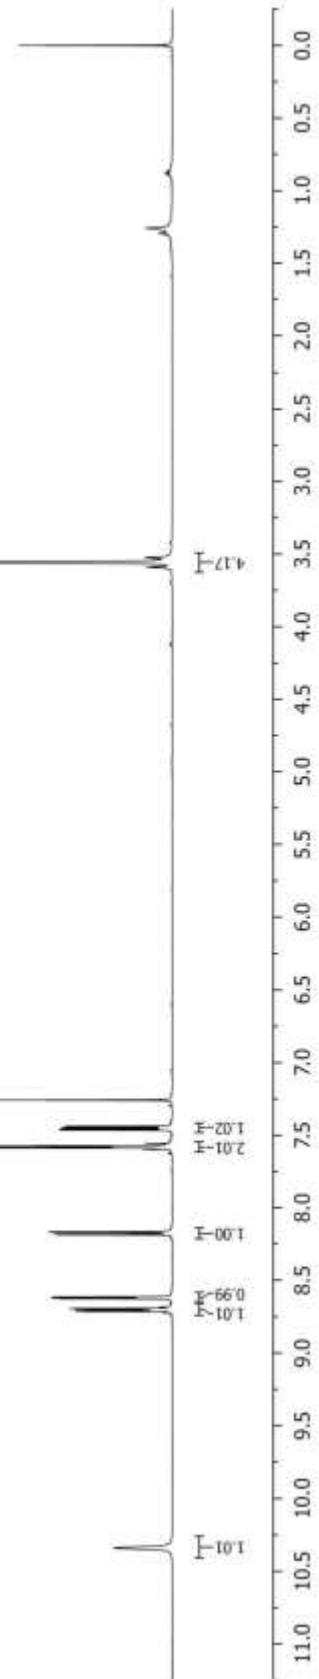

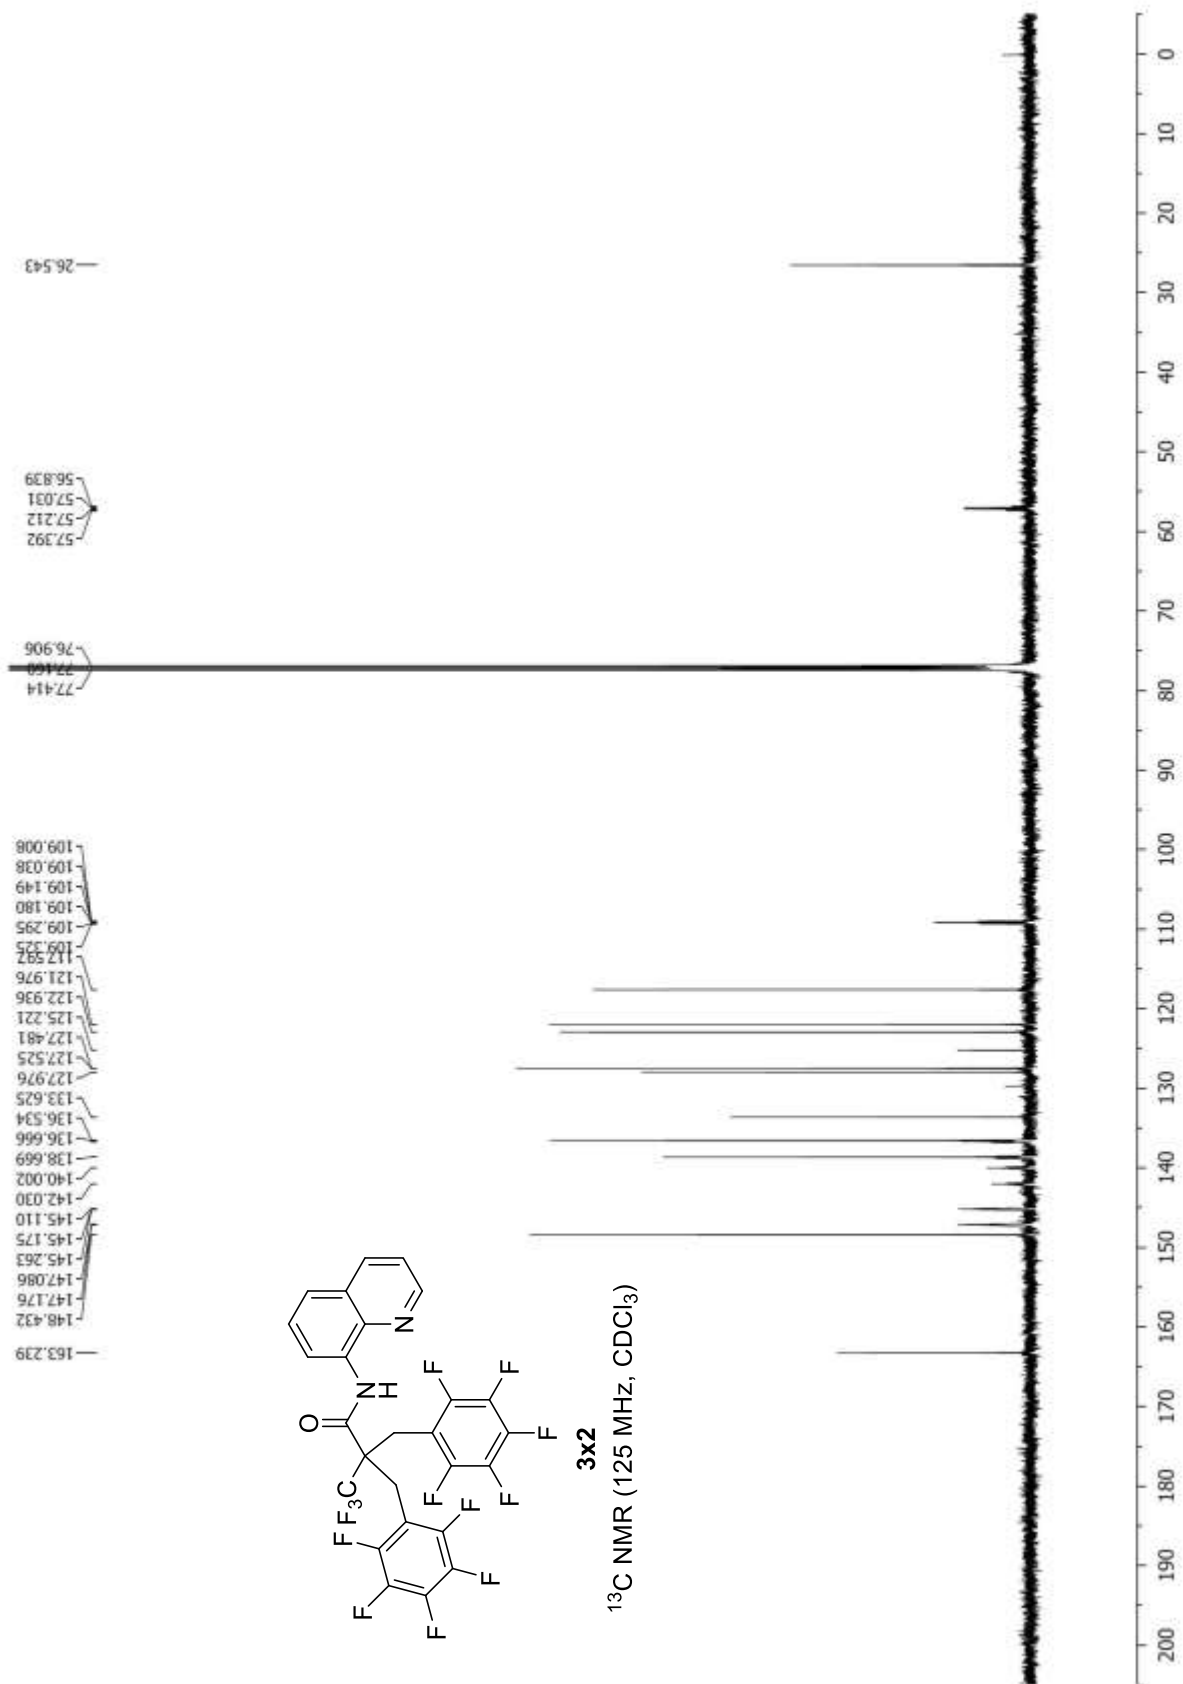

66.537

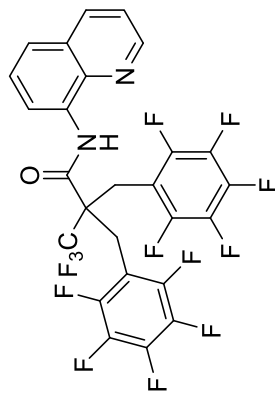

3x2

<sup>19</sup>F NMR (471 MHz, CDCl<sub>3</sub>)

154.117  
154.161  
154.205  
162.129  
162.142  
162.173  
162.187  
162.217  
162.234

138.099  
138.111  
138.131  
138.143

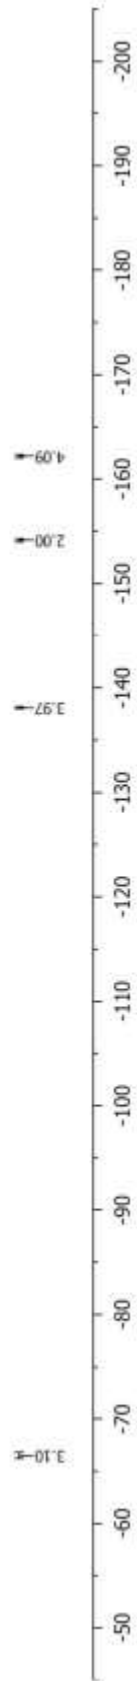

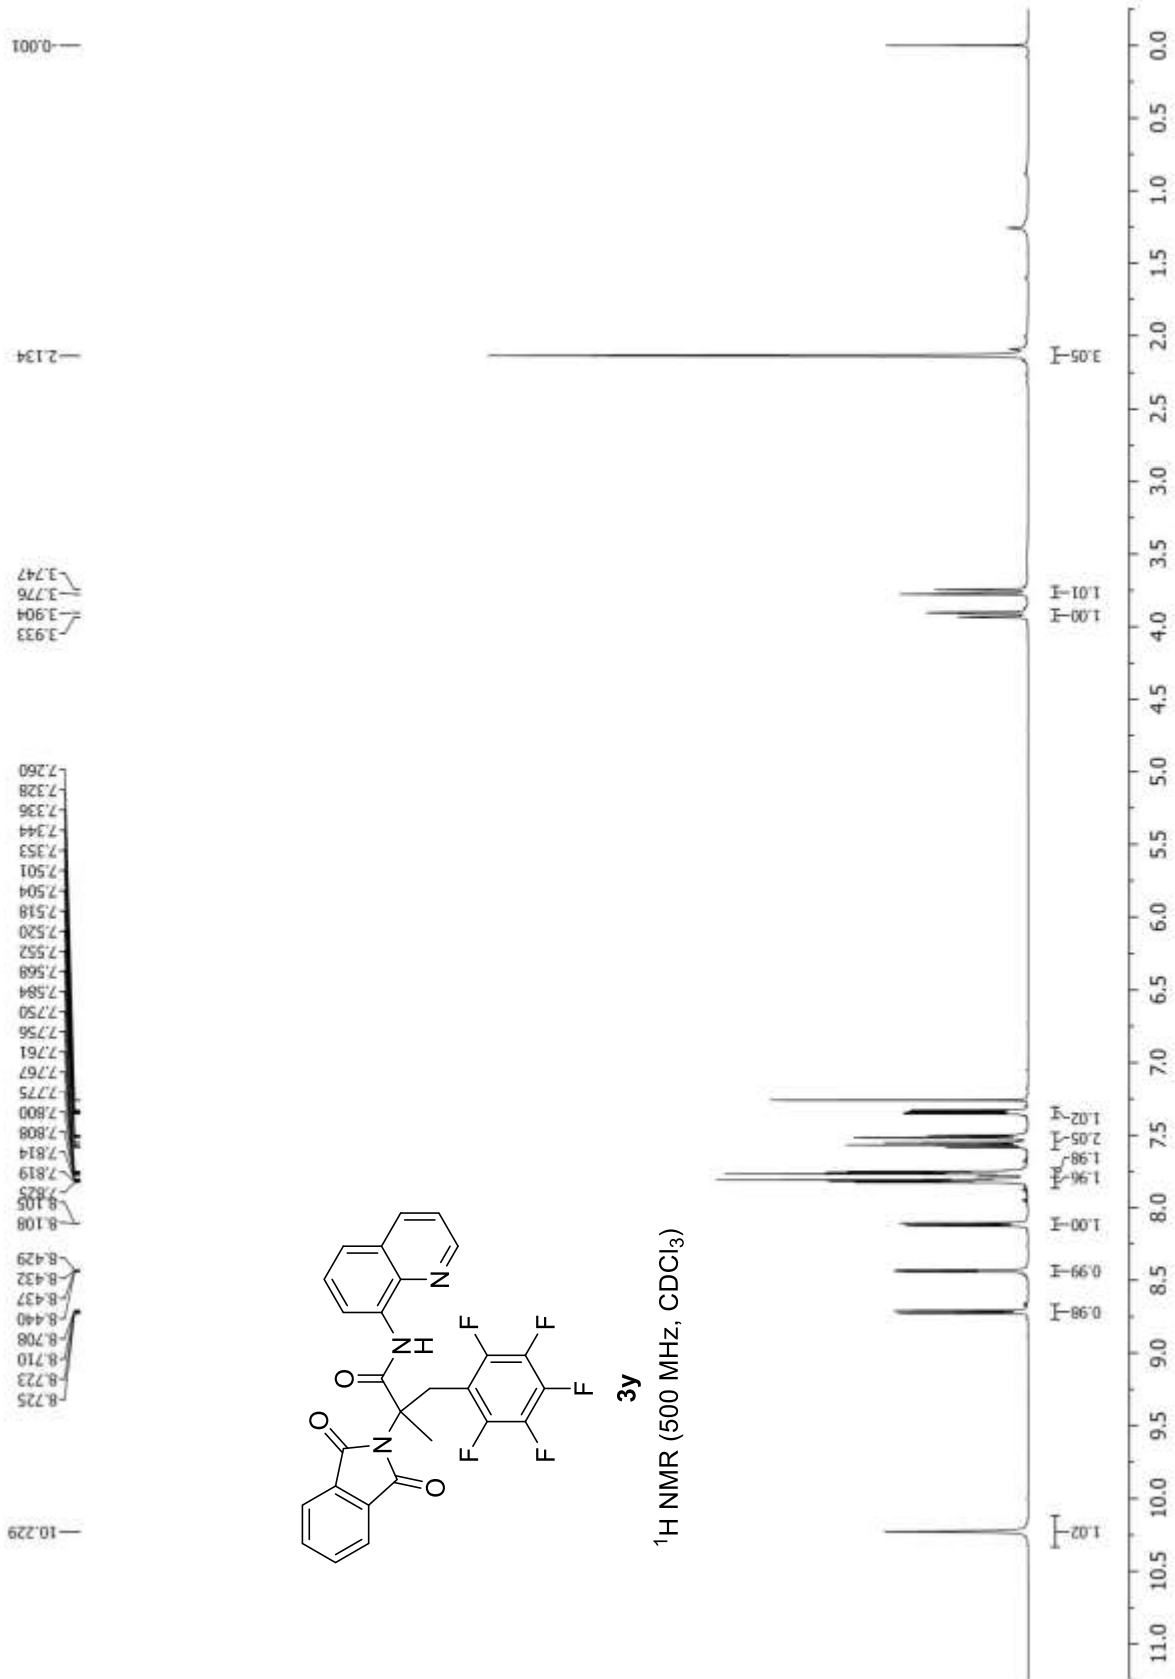



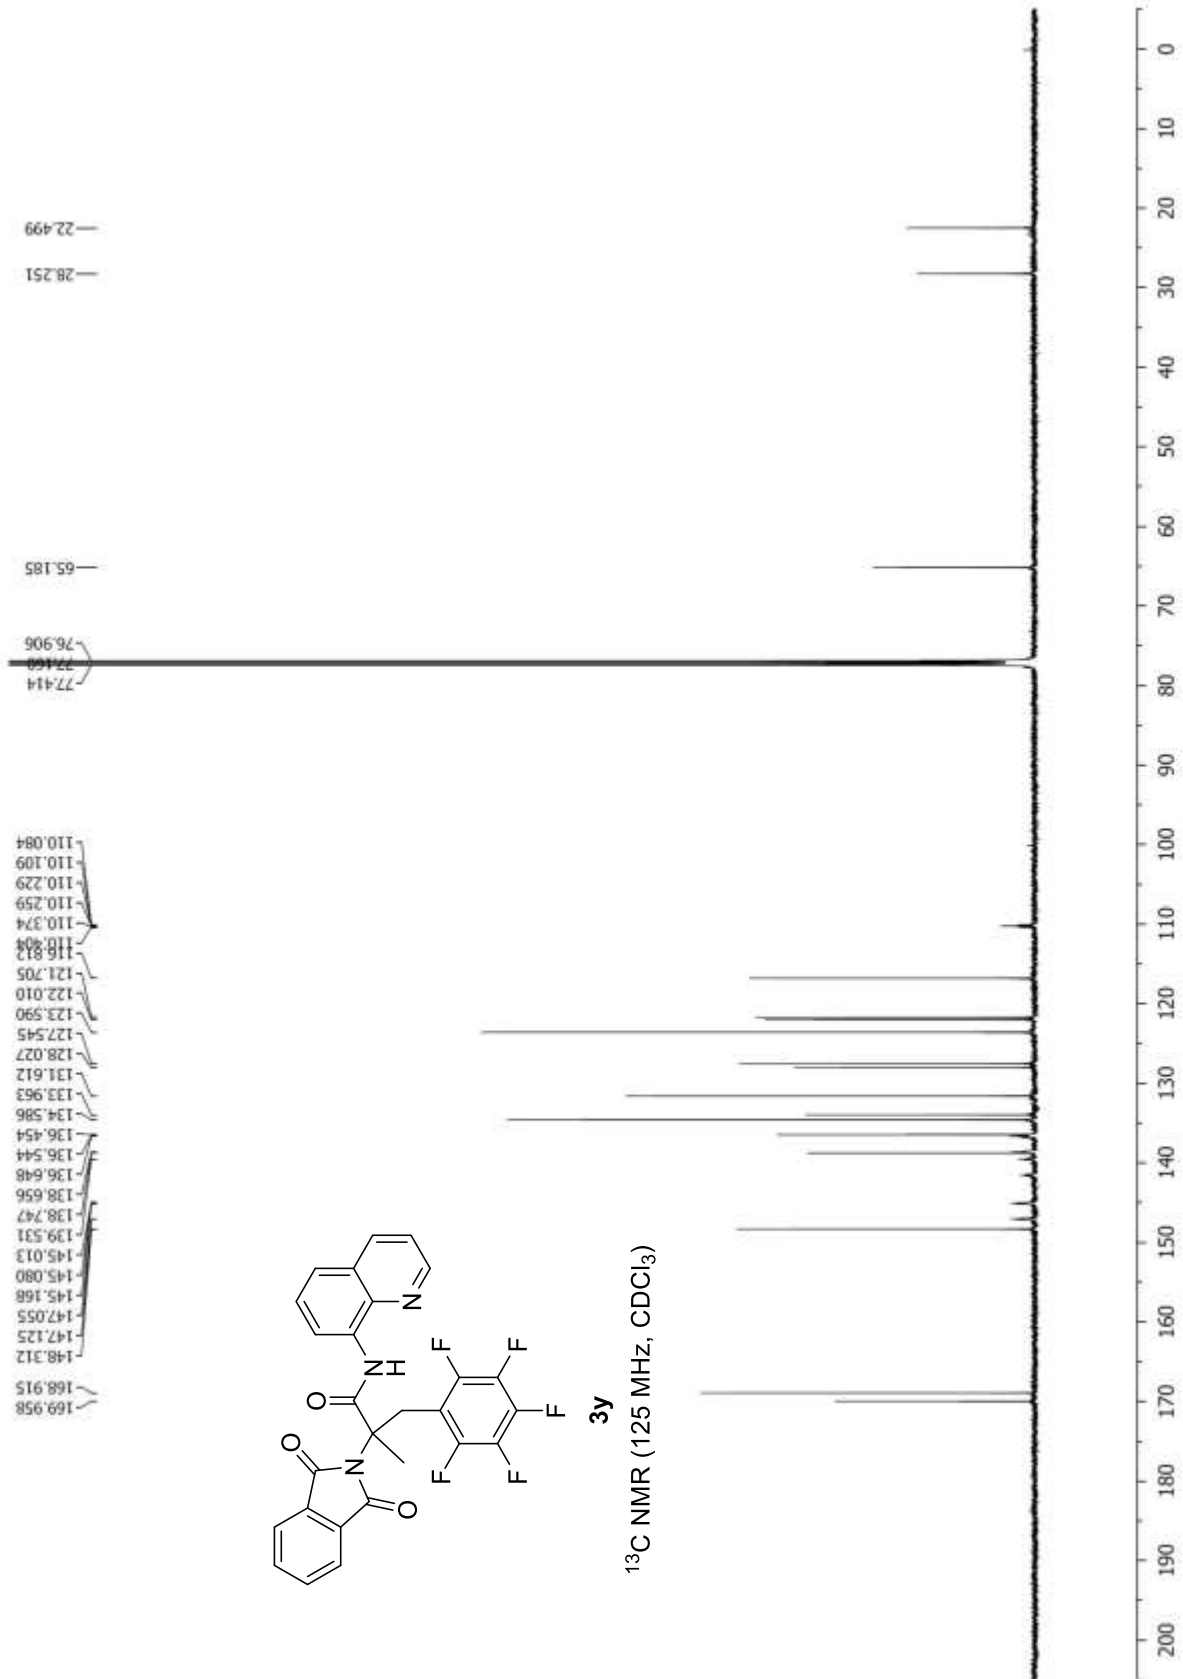

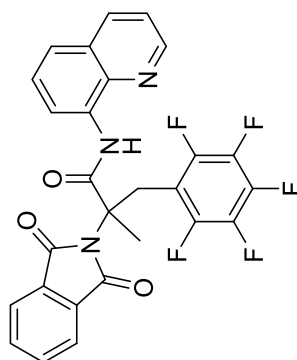

**3y**

$^{19}\text{F}$  NMR (471 MHz,  $\text{CDCl}_3$ )

140.565  
140.579  
140.611  
140.625  
154.356  
154.400  
154.445  
161.648  
161.664  
161.695  
161.710  
161.740  
161.757

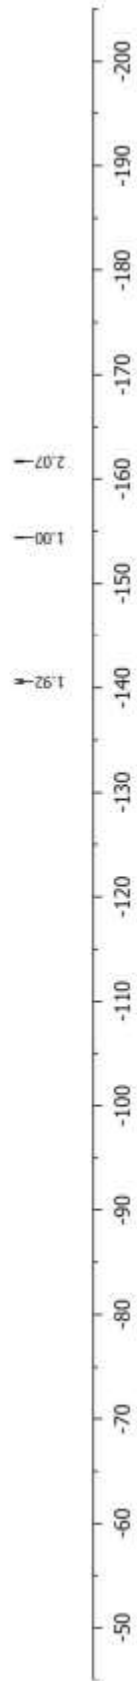

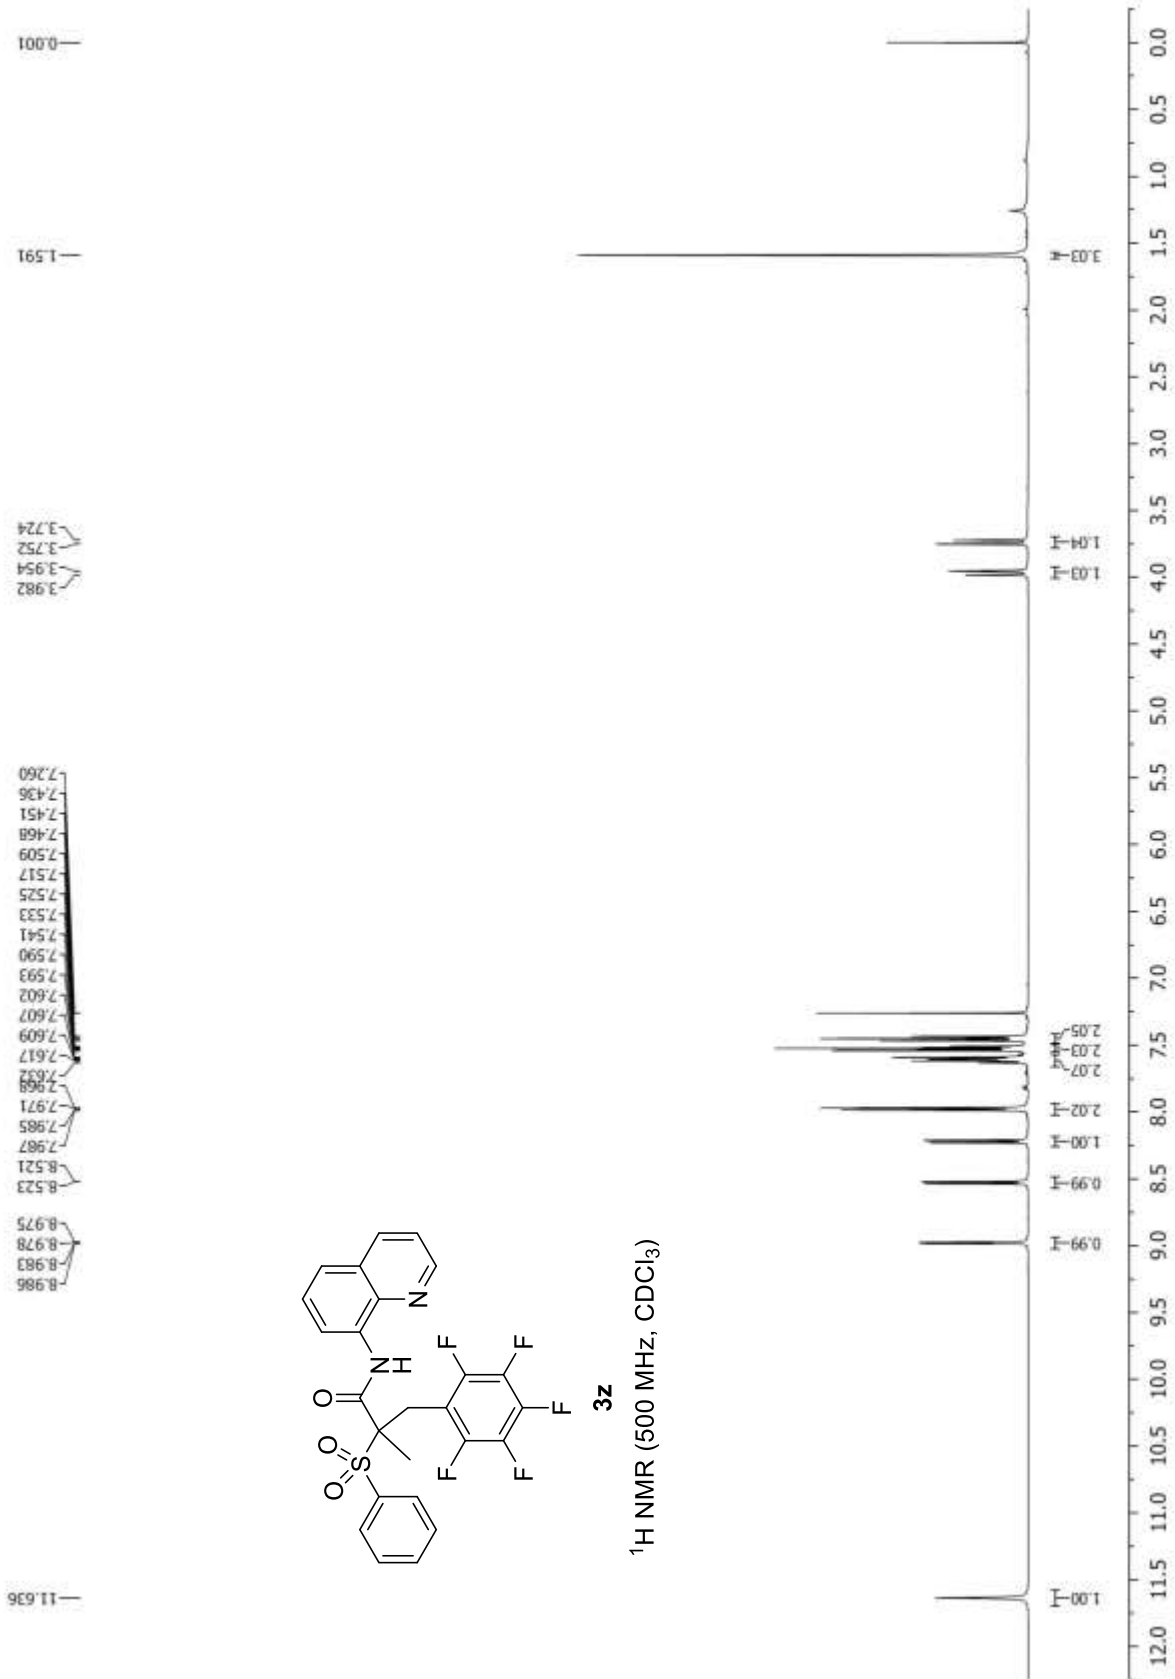

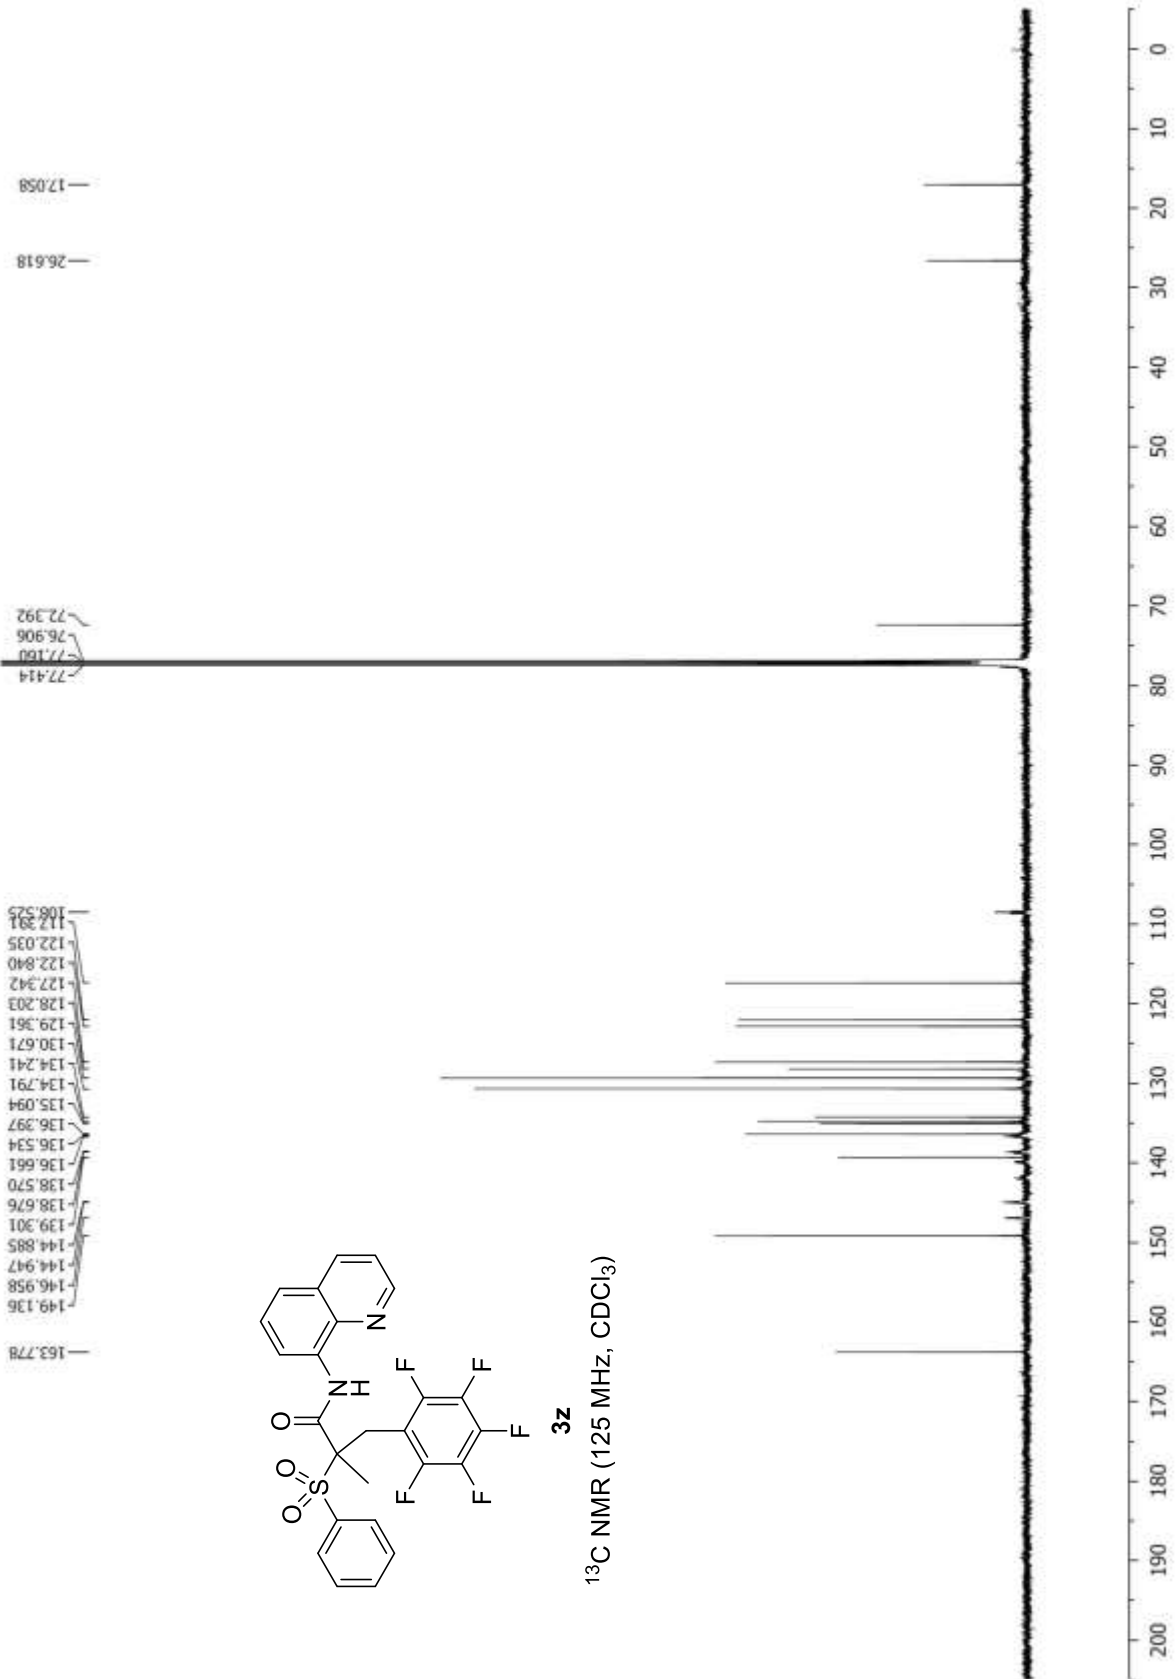

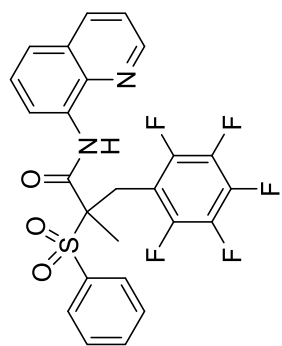

**3z**

$^{19}\text{F}$  NMR (471 MHz,  $\text{CDCl}_3$ )

153.777  
153.821  
153.866  
161.373  
161.386  
161.417  
161.430  
161.462

138.342  
138.356  
138.388  
138.402

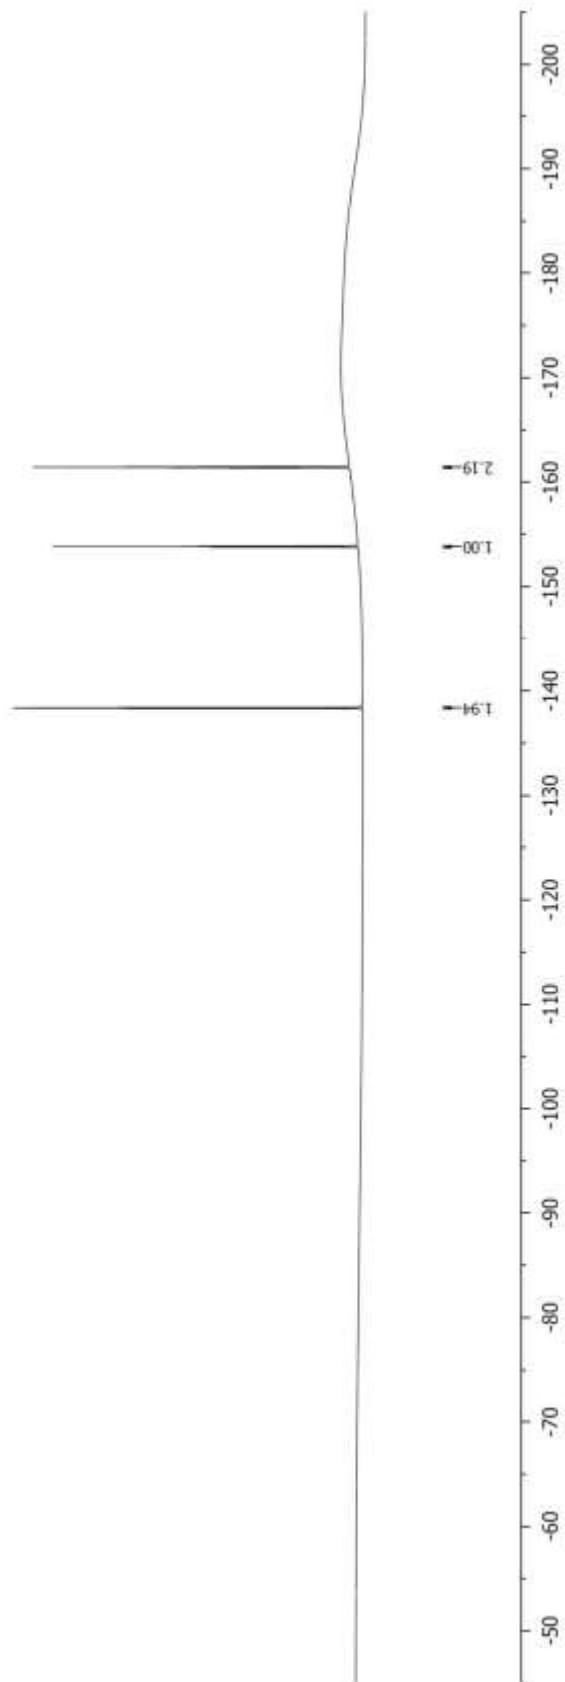

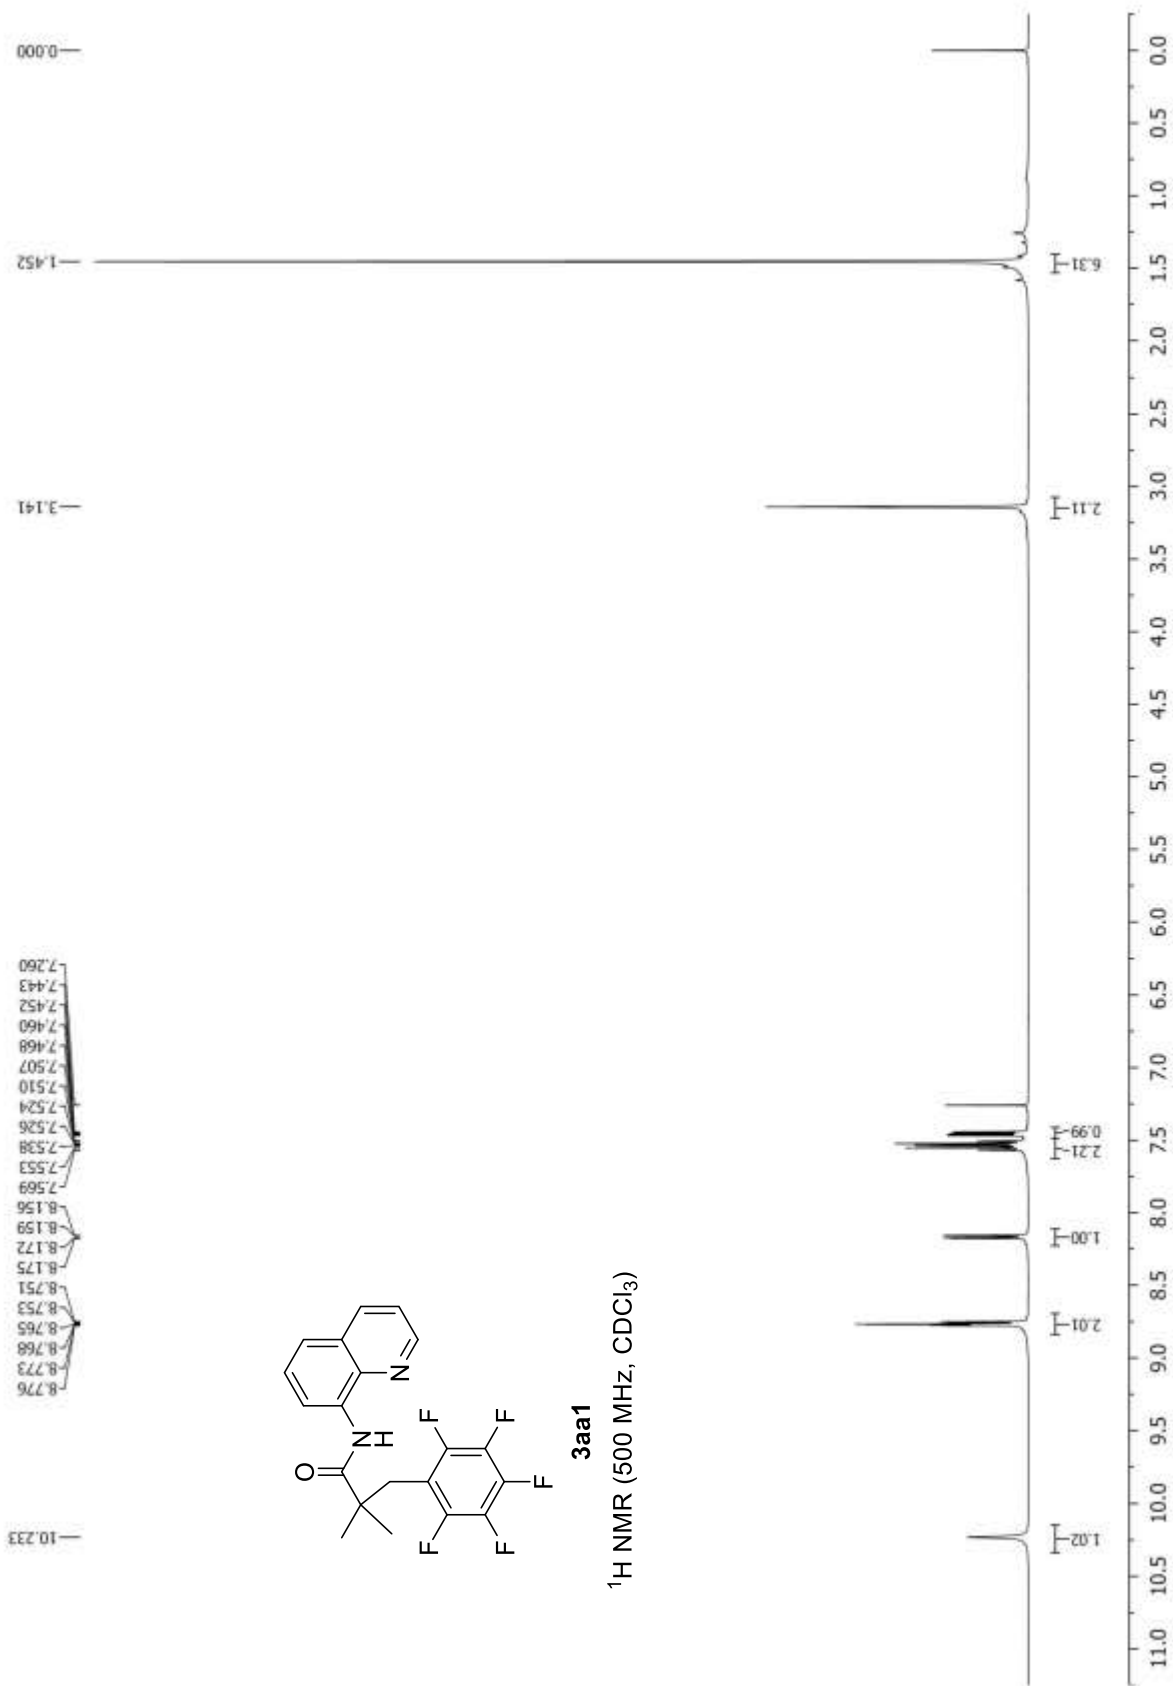

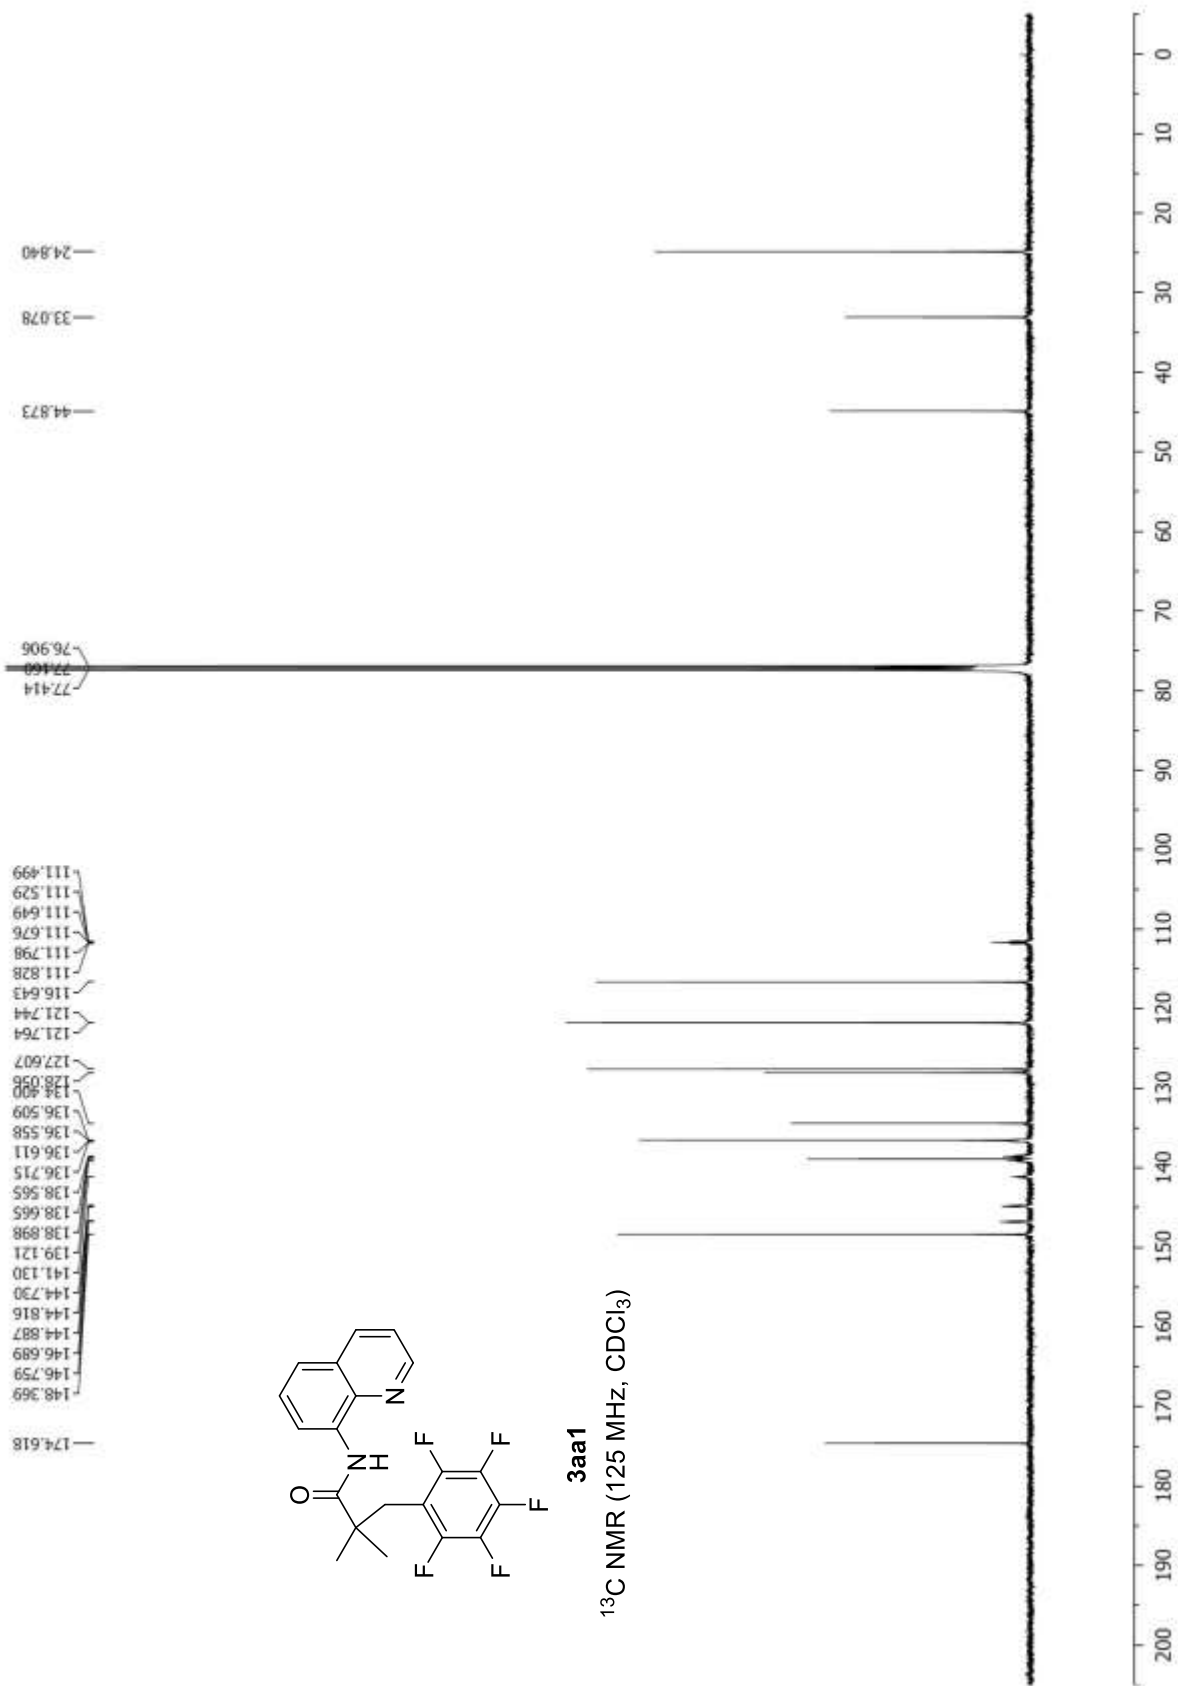

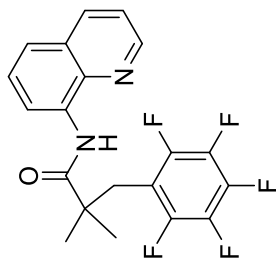

**3aa1**

<sup>19</sup>F NMR (471 MHz, CDCl<sub>3</sub>)

156.193  
156.237  
156.282  
162.606  
162.622  
162.652  
162.668  
162.697  
162.714

139.573  
139.590  
139.621  
139.638

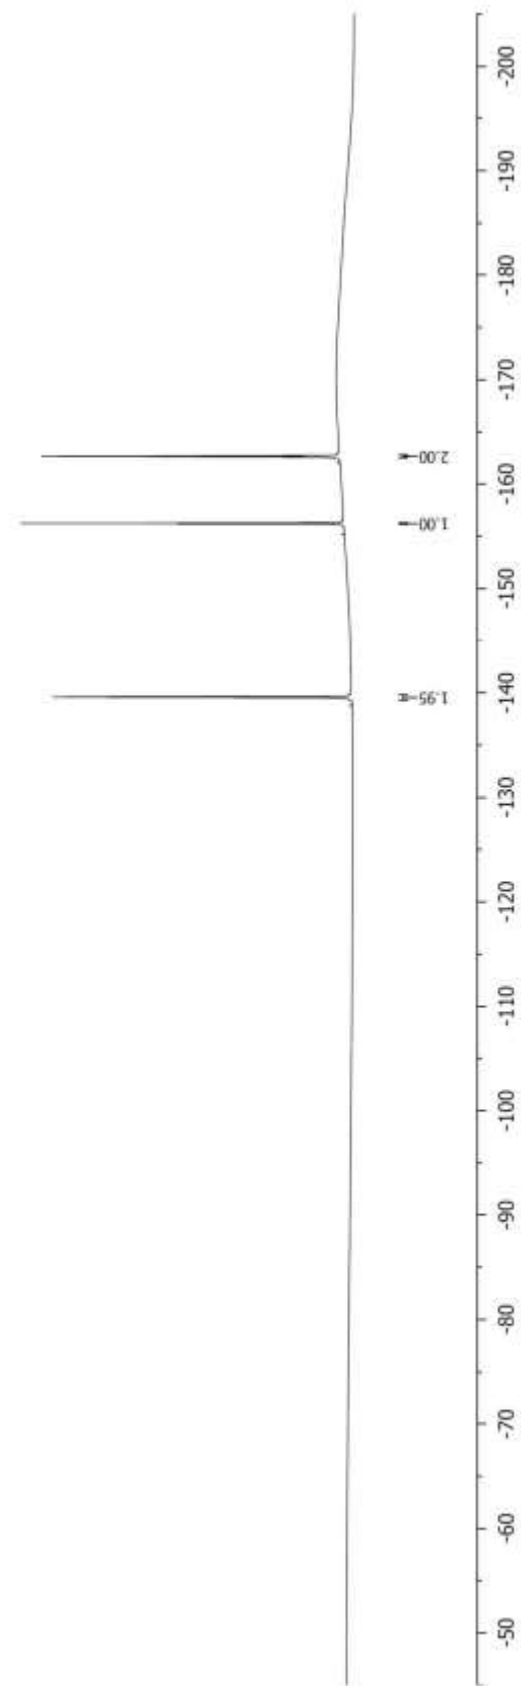



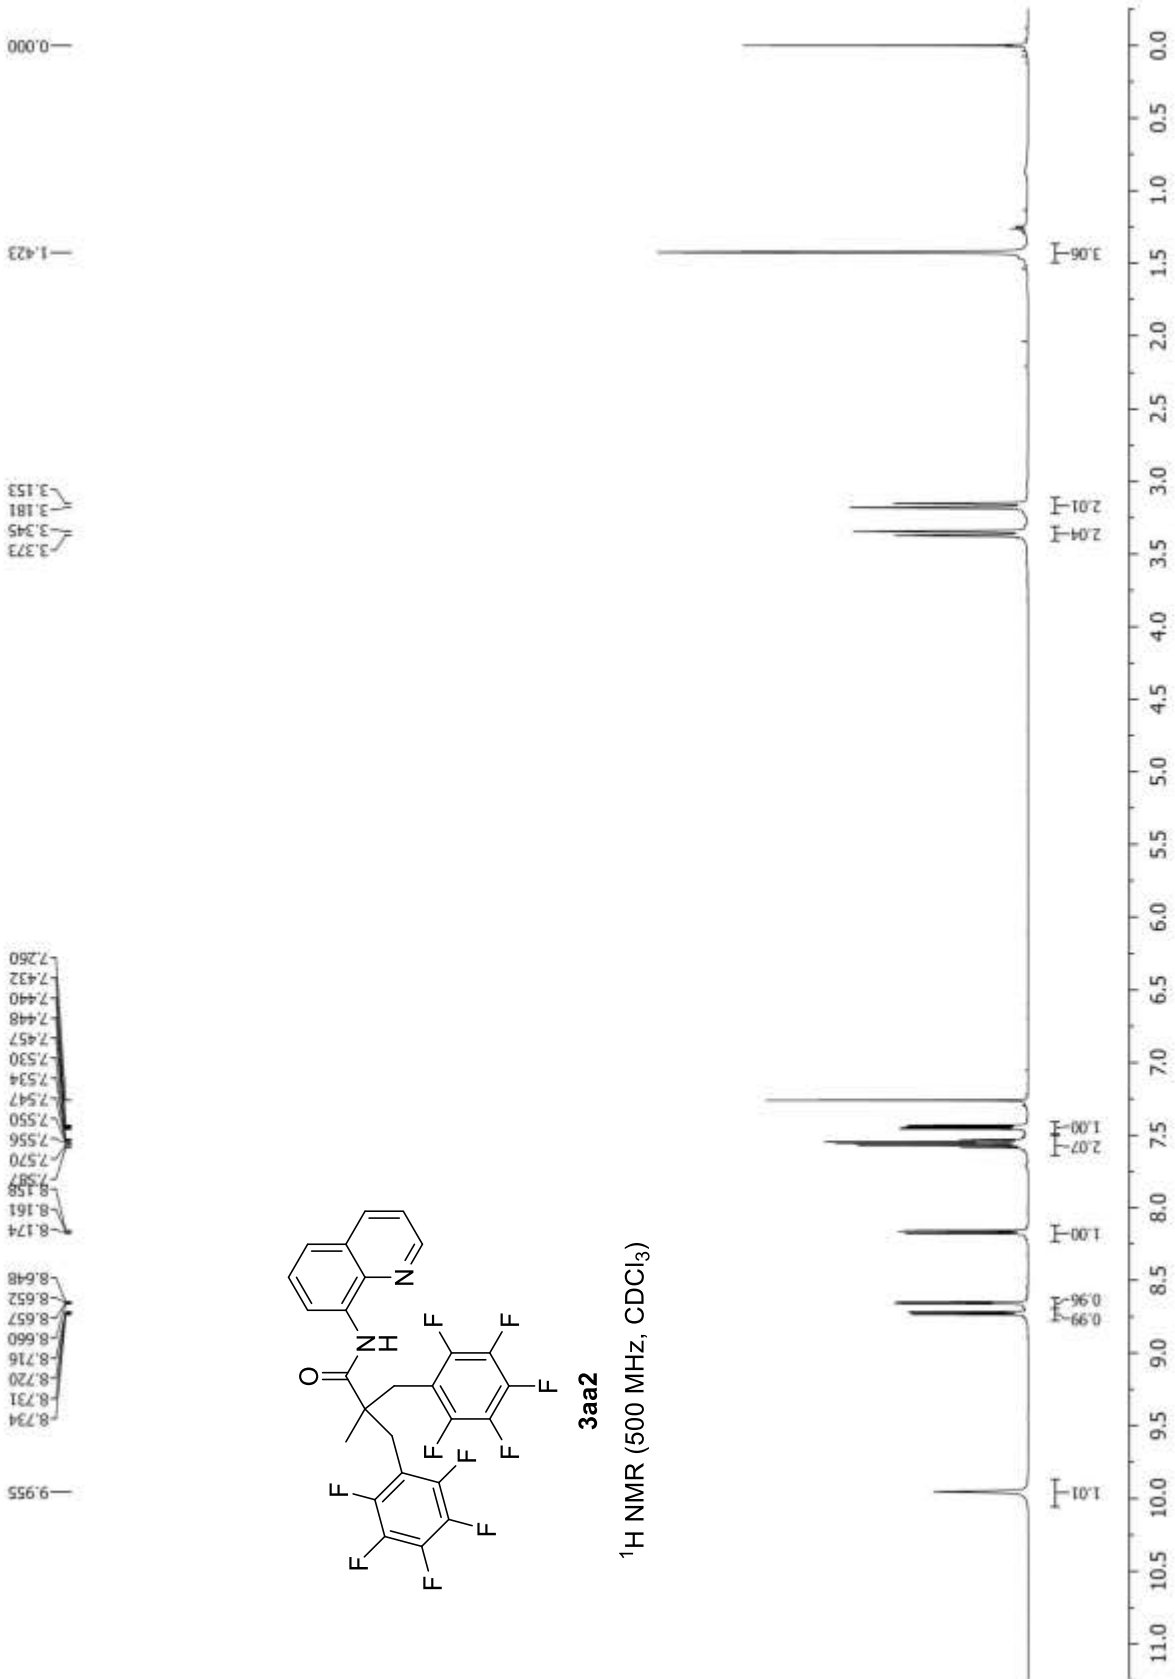

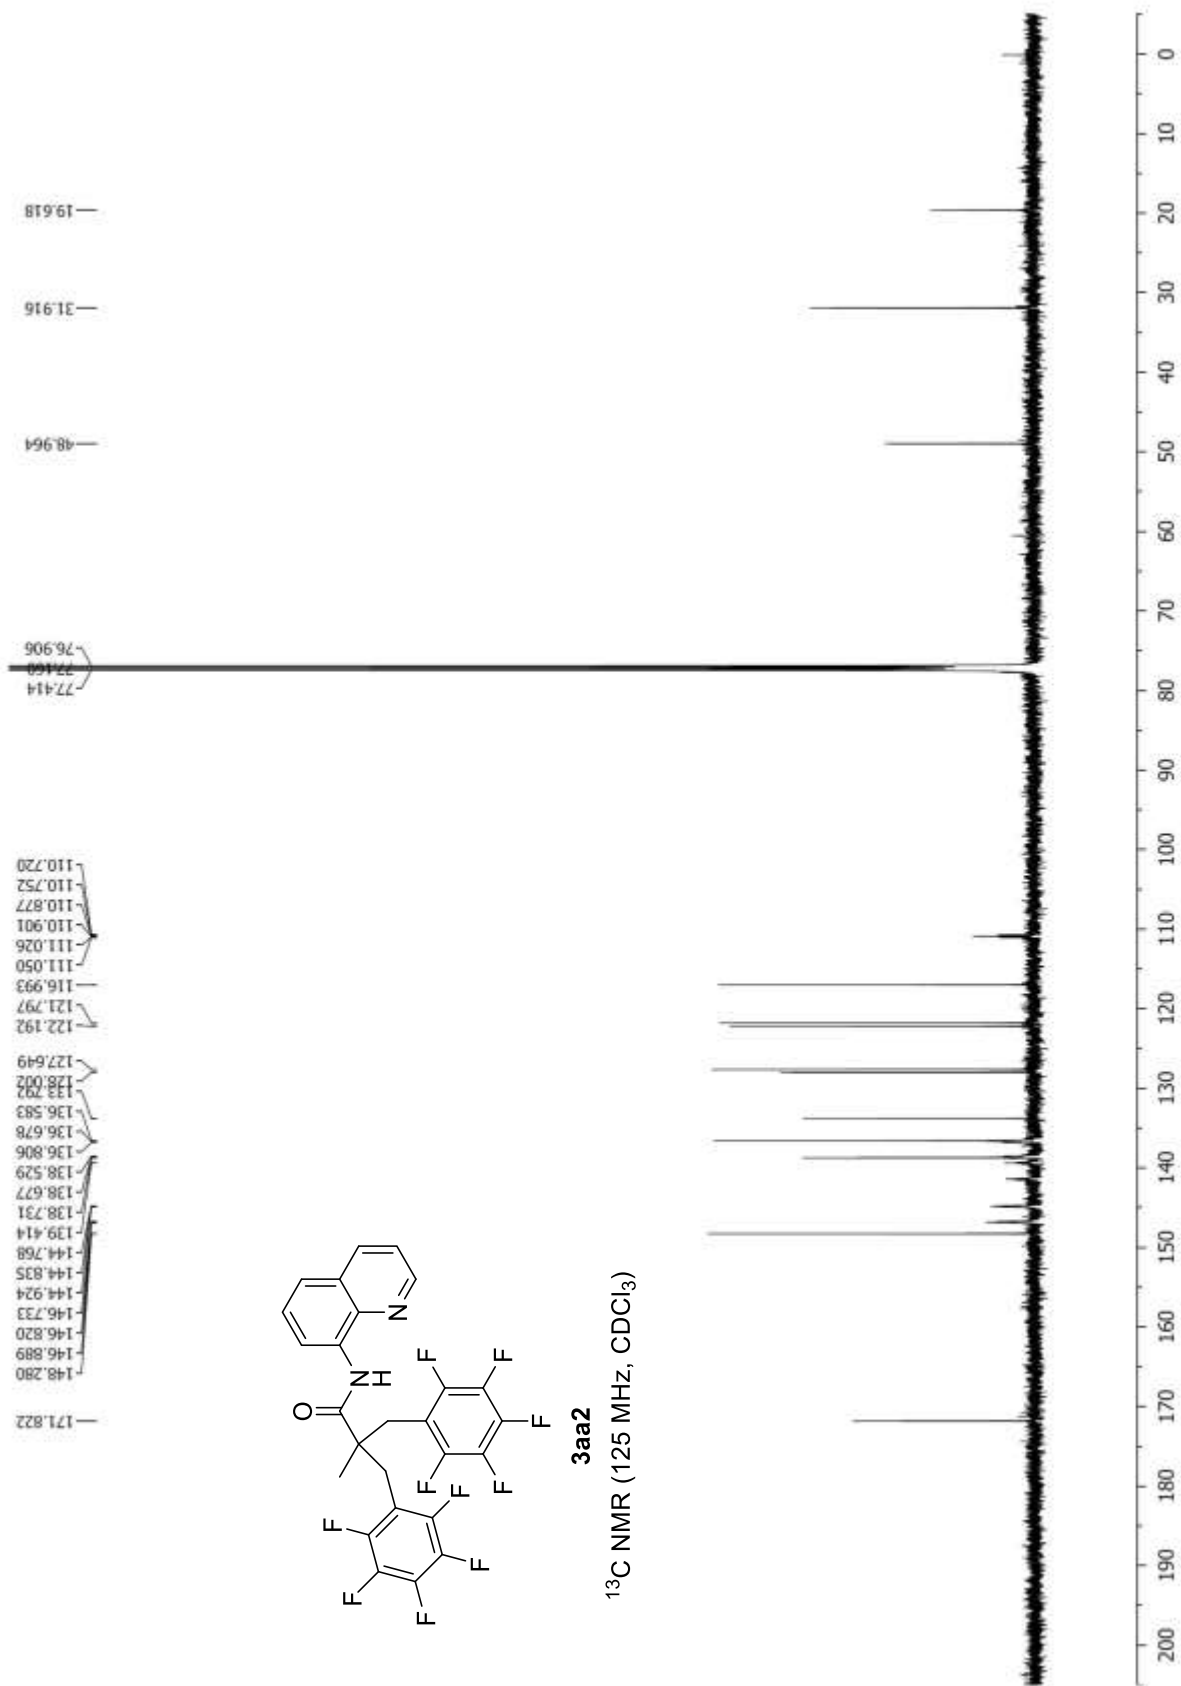

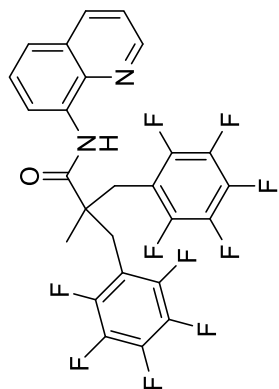

**3aa2**

<sup>19</sup>F NMR (471 MHz, CDCl<sub>3</sub>)

155.139  
155.183  
155.228  
161.984  
161.999  
162.029  
162.044  
162.074  
162.091

138.794  
138.800  
138.832  
138.848

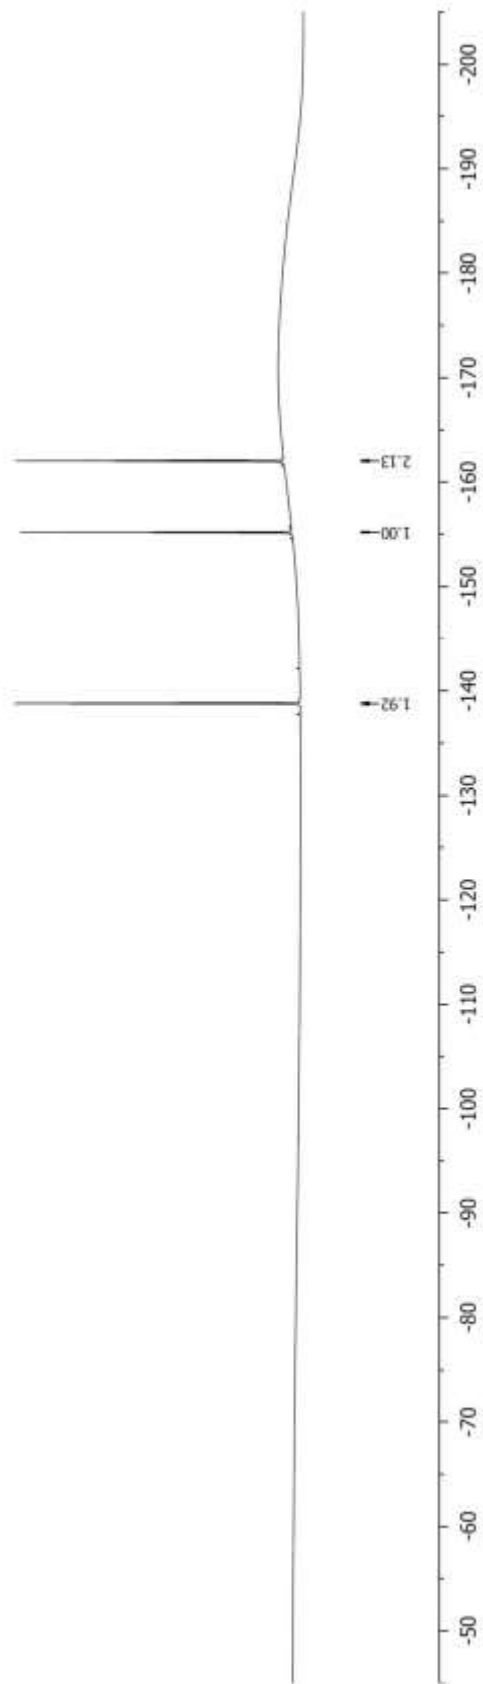

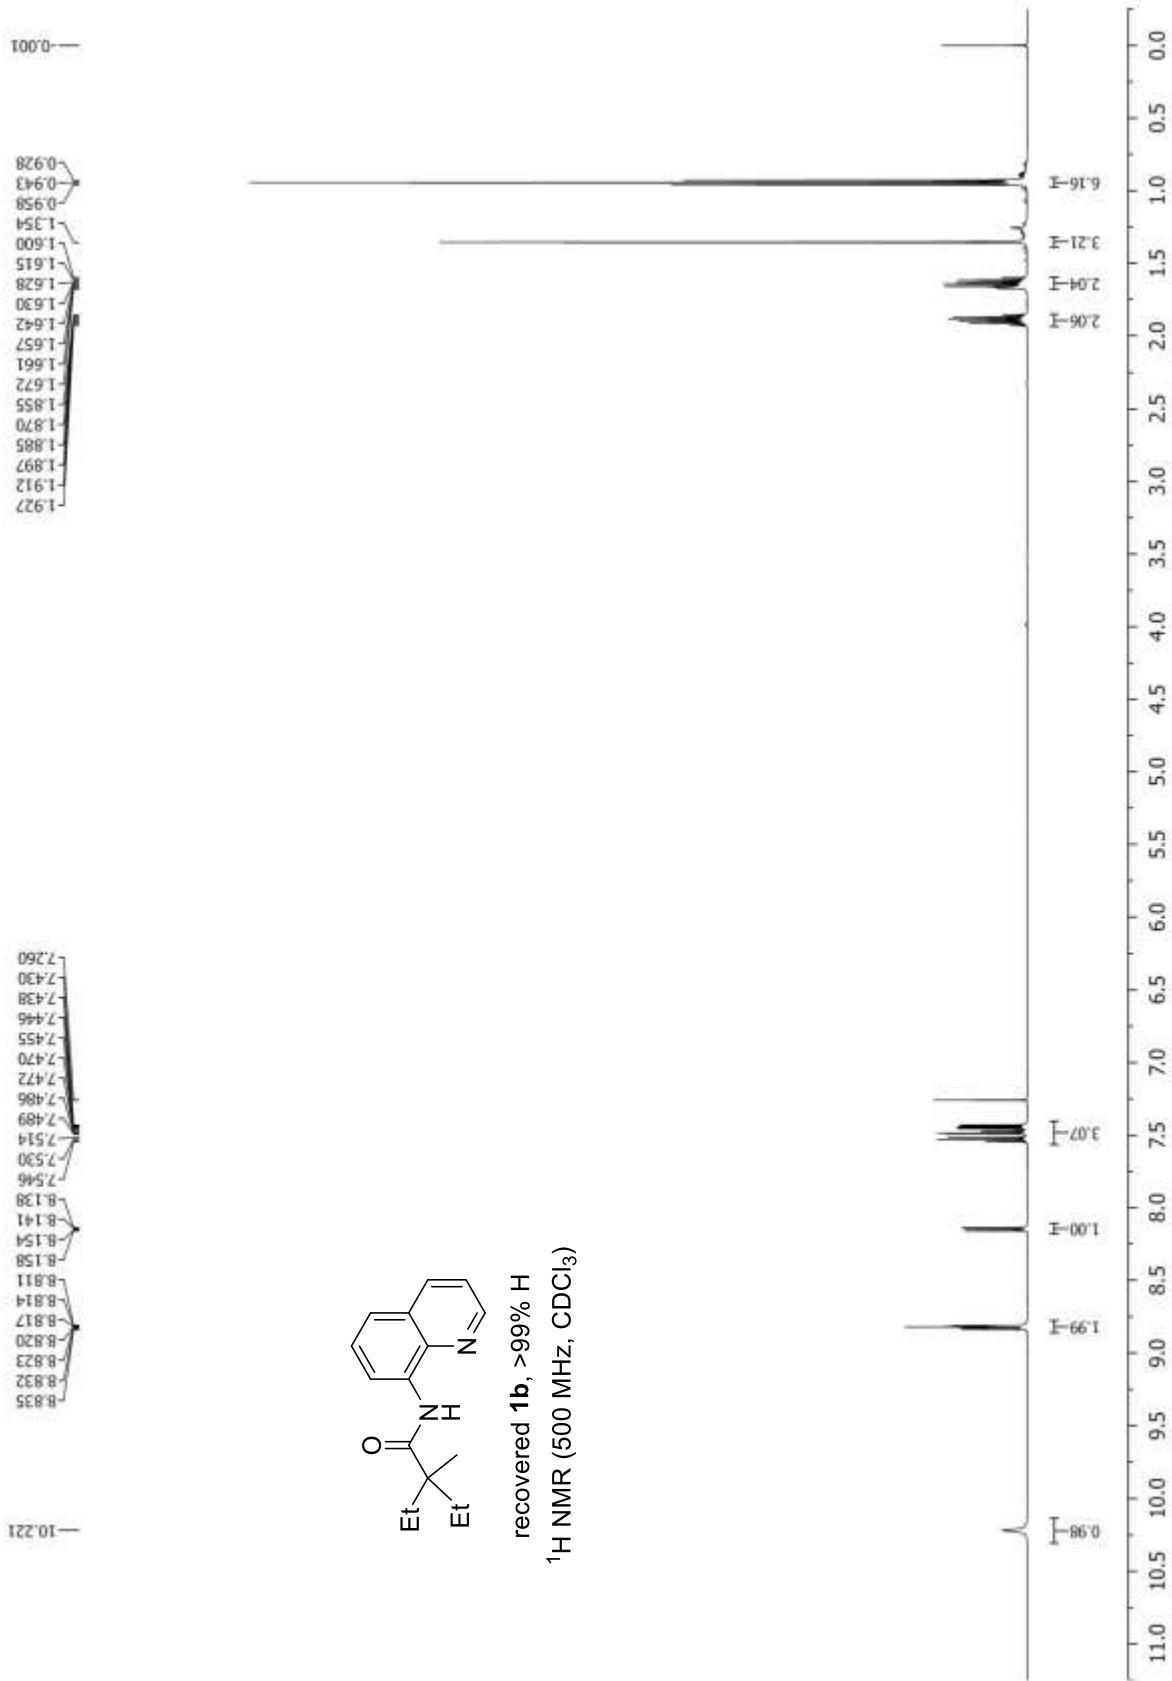

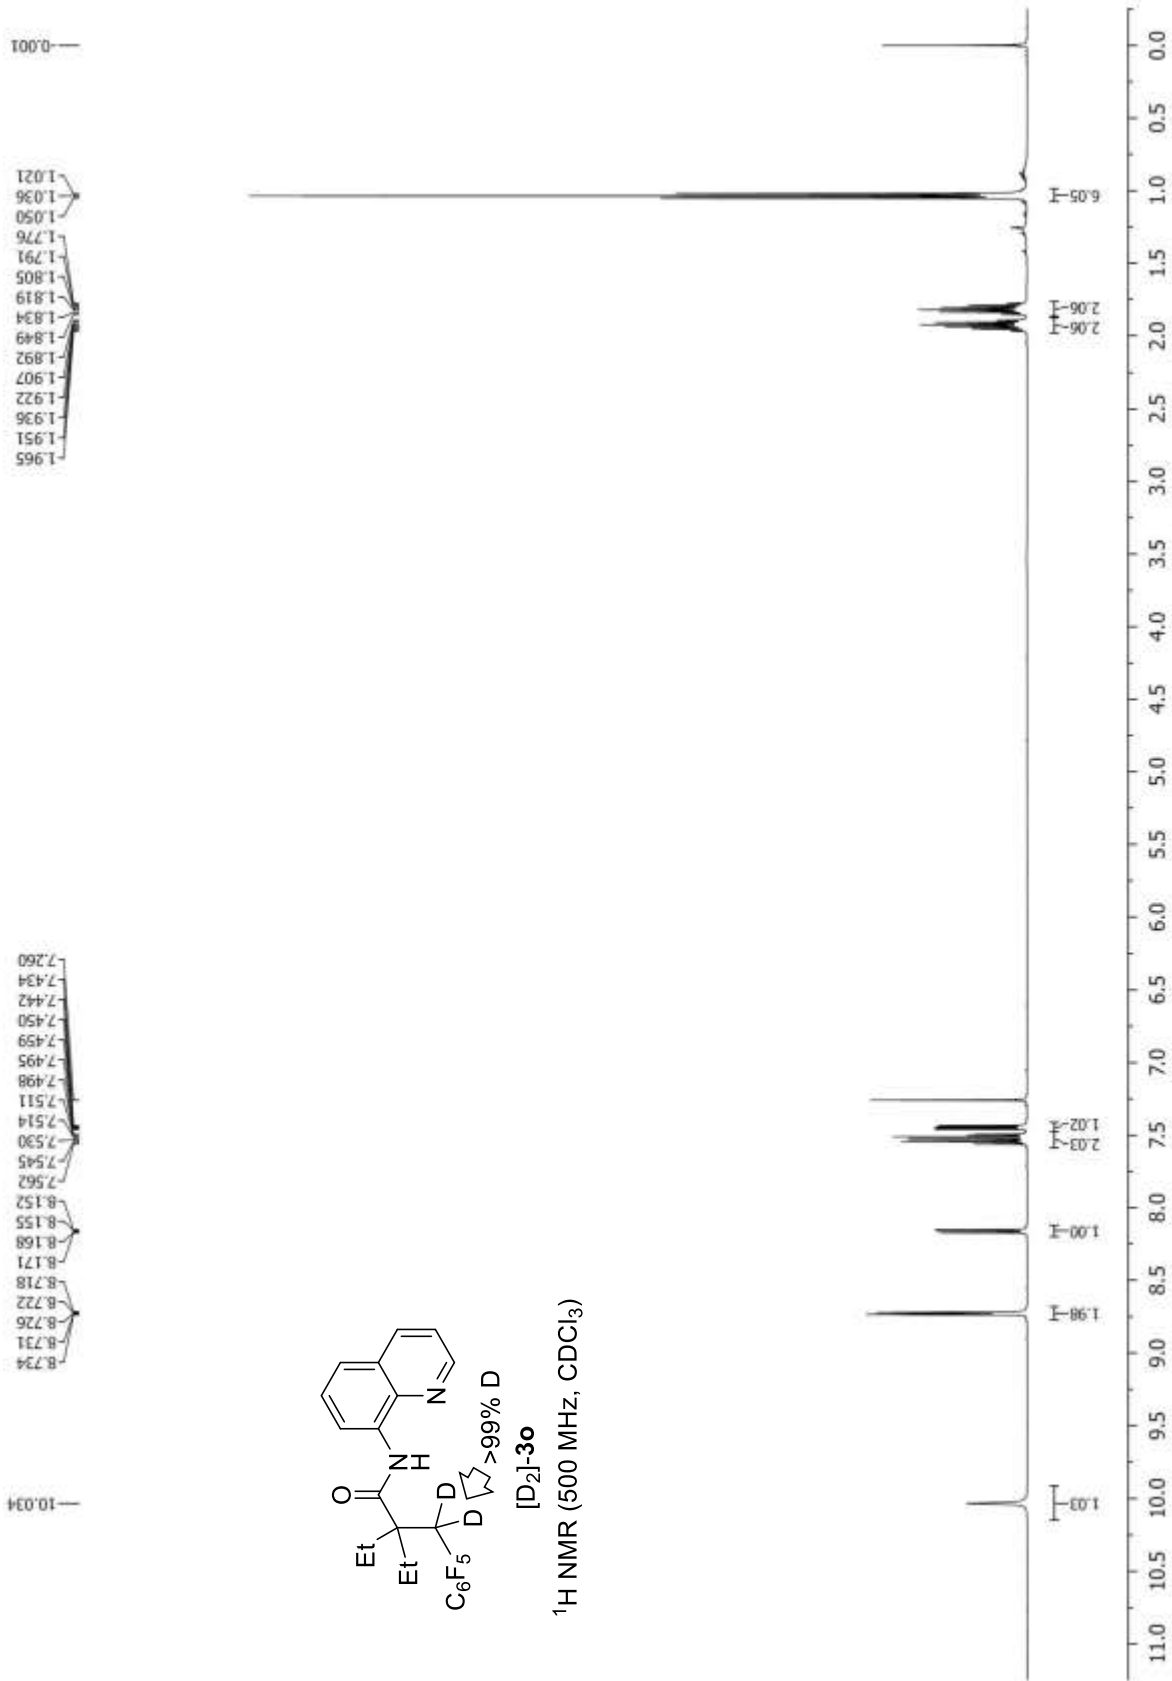

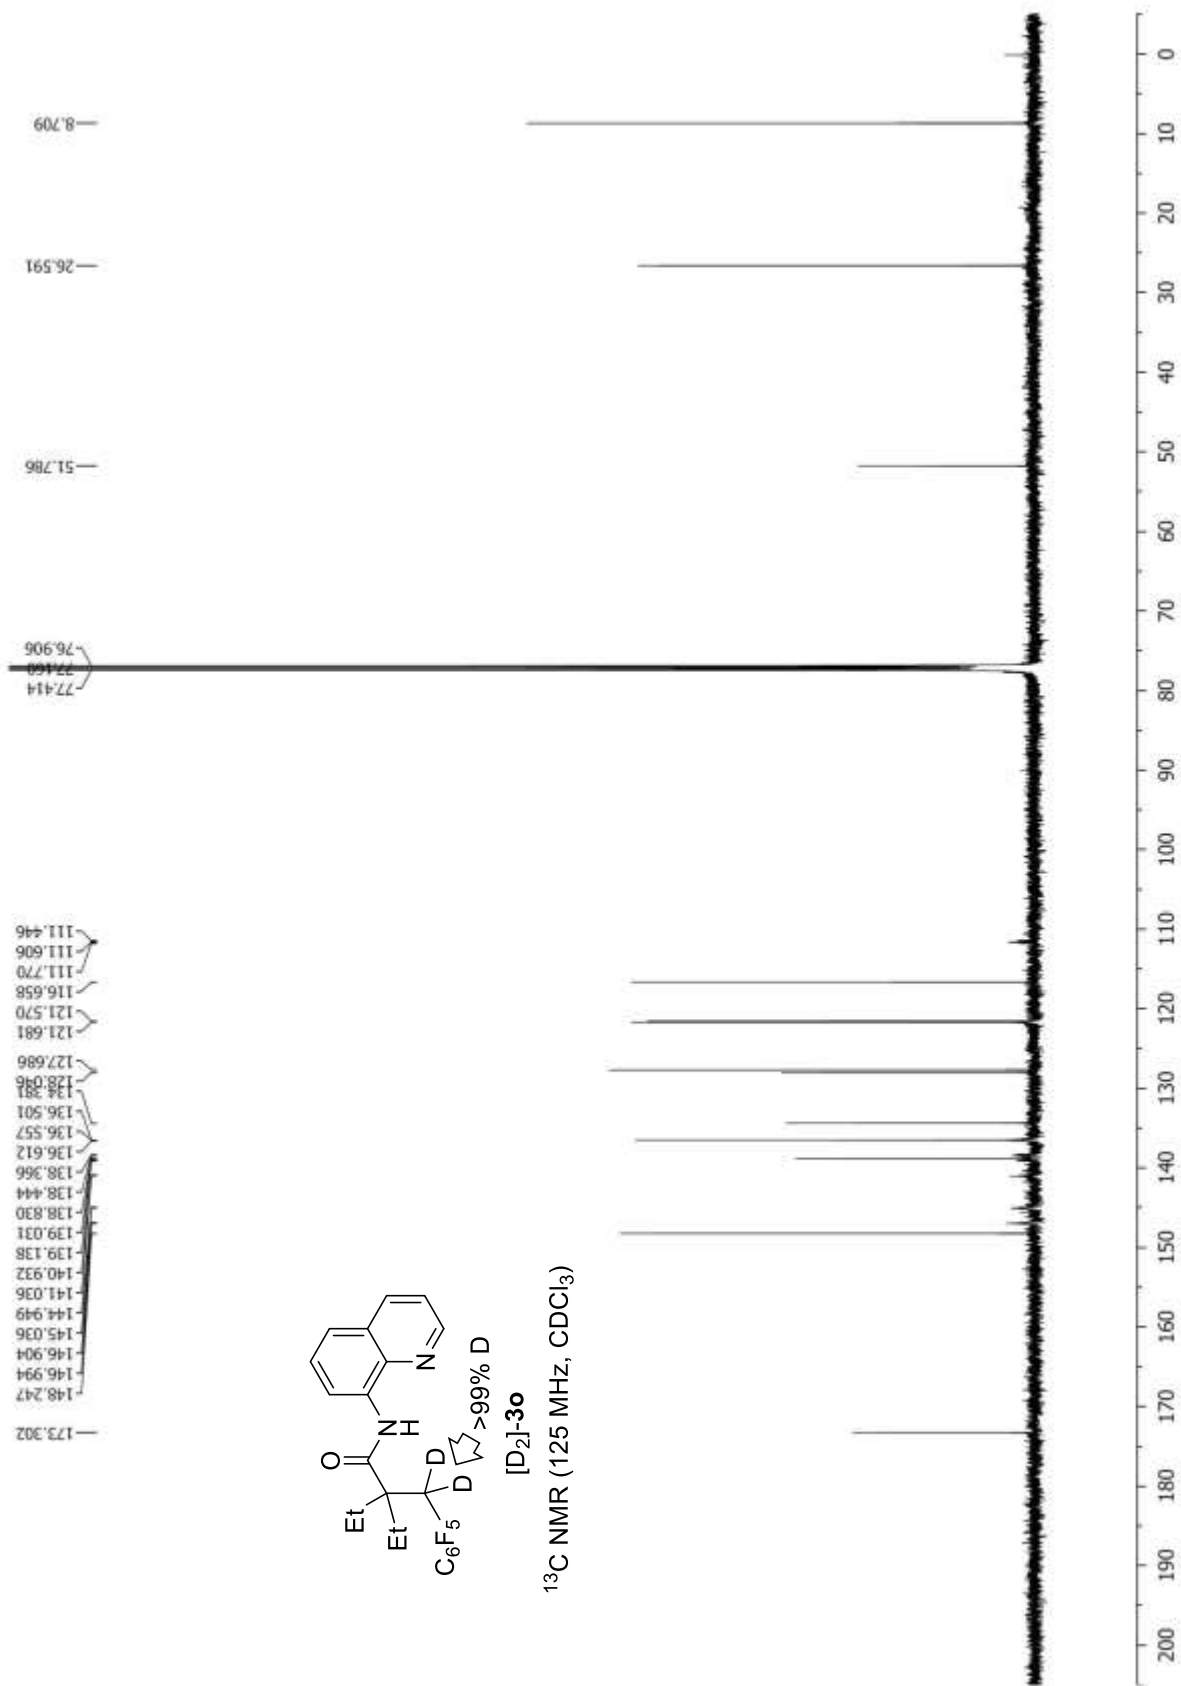

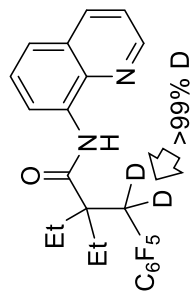

**[D<sub>2</sub>]-3o**  
<sup>19</sup>F NMR (471 MHz, CDCl<sub>3</sub>)

156.584  
 156.628  
 156.673  
 163.077  
 163.082  
 163.095  
 163.118  
 163.126  
 163.139  
 163.148  
 163.170  
 163.187  
 163.192

139.338  
 139.354  
 139.386  
 139.402

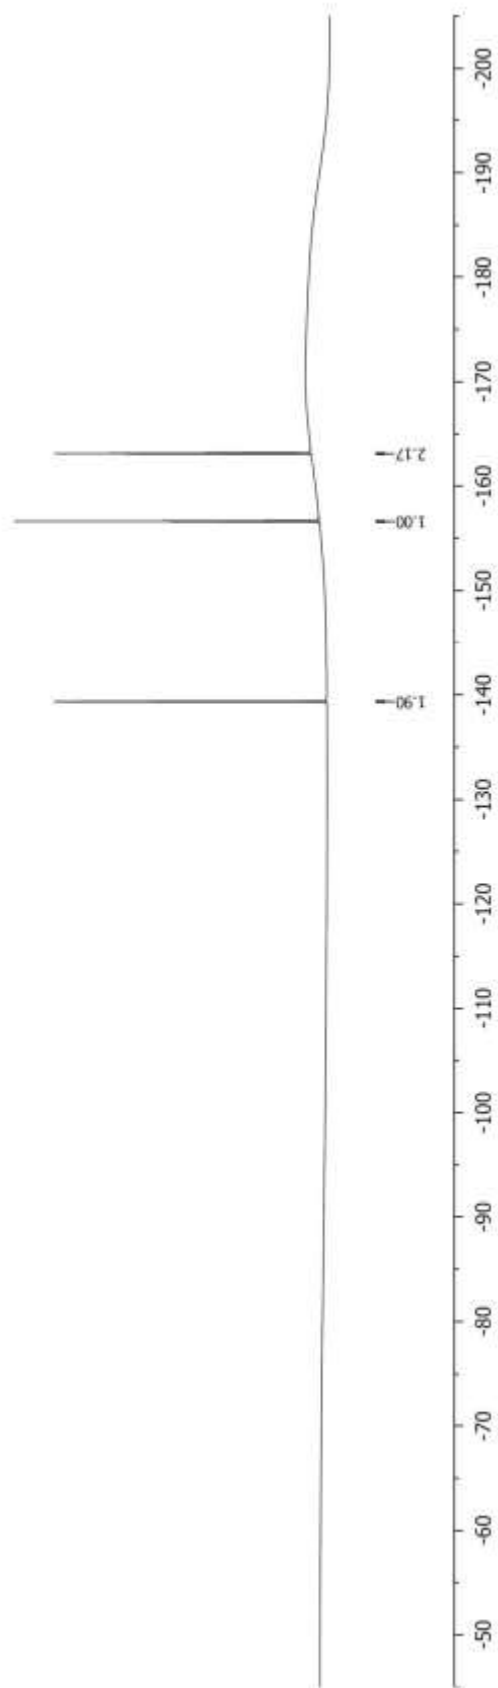

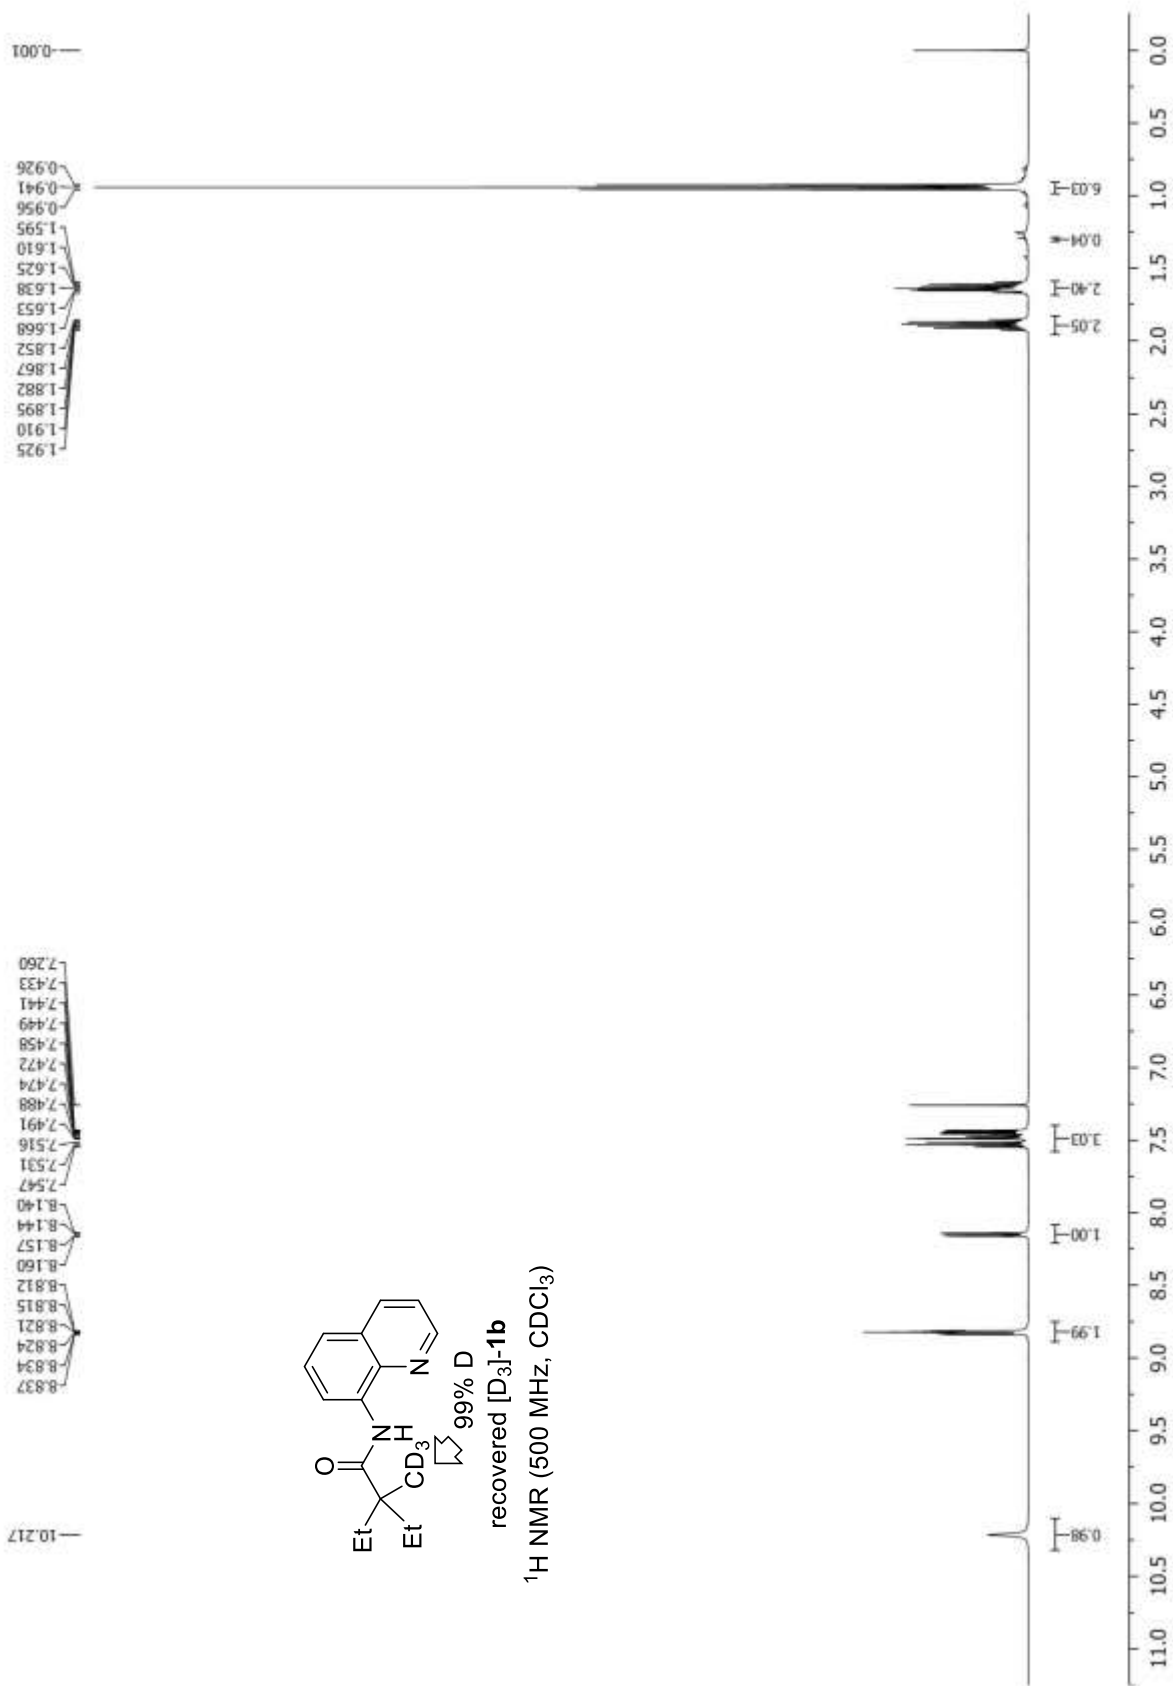

Supplement: SC-006-C5SC02143J-s001.pdf [file SC-006-C5SC02143J-s001.pdf]
